# Supplementary material for: Neuronal Prosurvival Role of Ceramide Synthase 2 by Olidogendrocyte-to-Neuron Extracellular Vesicle Transfer
Source: Int J Mol Sci. 2023 Mar 22;24(6):5986. doi: 10.3390/ijms24065986 (PMC10052063; doi:10.3390/ijms24065986)
Supplement: Supplementary file 1 [file ijms-24-05986-s001.zip › Casadomé-Perales et al_SuppTables.xlsx]

## Sheet: Supp.Table S1
contrast	Log2_fold_Over_Old	pvalue	pvalue (-Log10)	evalue	qvalue	num_replicates	num_peptides	set_type	inferred_proteins	description
old/young	-0.824	9.9999e-06	5	0.03	0.025	3	59	inferred	Q68FD5	Q68FD5|CLH1_MOUSE Clathrin heavy chain 1 OS=Mus musculus OX=10090 GN=Cltc PE=1 SV=3
old/young	-1.413	2.99997e-05	4.52288	0.08	0.025	3	20	unresolved	O35643;Q9DBG3	O35643|AP1B1_MOUSE AP-1 complex subunit beta-1 OS=Mus musculus OX=10090 GN=Ap1b1 PE=1 SV=2
old/young	5.857	5.99994e-05	4.22185	0.15	0.038	3	1	unresolved	O88844;P54071	O88844|IDHC_MOUSE Isocitrate dehydrogenase [NADP] cytoplasmic OS=Mus musculus OX=10090 GN=Idh1 PE=1 SV=2
old/young	-6.133	2.99997e-05	4.52288	0.08	0.038	3	4	inferred	Q8JZR0	Q8JZR0|ACSL5_MOUSE Long-chain-fatty-acid--CoA ligase 5 OS=Mus musculus OX=10090 GN=Acsl5 PE=1 SV=1
old/young	12.081	0.000159998	3.79588	0.4	0.081	3	1	inferred	Q8BSZ2	Q8BSZ2|AP3S2_MOUSE AP-3 complex subunit sigma-2 OS=Mus musculus OX=10090 GN=Ap3s2 PE=1 SV=1
old/young	-0.866	0.000199998	3.69897	0.5	0.084	3	24	inferred	Q9DBG3	Q9DBG3|AP2B1_MOUSE AP-2 complex subunit beta OS=Mus musculus OX=10090 GN=Ap2b1 PE=1 SV=1
old/young	6.532	0.000289997	3.53761	0.73	0.104	1	1	inferred	Q80WV3	Q80WV3|CHST2_MOUSE Carbohydrate sulfotransferase 2 OS=Mus musculus OX=10090 GN=Chst2 PE=2 SV=3
old/young	2.456	0.000449996	3.34679	1.13	0.126	3	2	inferred	Q99LC3	Q99LC3|NDUAA_MOUSE NADH dehydrogenase [ubiquinone] 1 alpha subcomplex subunit 10, mitochondrial OS=Mus musculus OX=10090 GN=Ndufa10 PE=1 SV=1
old/young	2.982	0.000529995	3.27573	1.33	0.133	3	2	inferred	P97411	P97411|ICA69_MOUSE Islet cell autoantigen 1 OS=Mus musculus OX=10090 GN=Ica1 PE=1 SV=3
old/young	-8.051	0.000609994	3.21467	1.54	0.14	1	1	inferred	Q9JIZ9	Q9JIZ9|PLS3_MOUSE Phospholipid scramblase 3 OS=Mus musculus OX=10090 GN=Plscr3 PE=1 SV=1
old/young	-0.772	0.000449996	3.34679	1.13	0.142	3	18	inferred	Q6P5E4	Q6P5E4|UGGG1_MOUSE UDP-glucose:glycoprotein glucosyltransferase 1 OS=Mus musculus OX=10090 GN=Uggt1 PE=1 SV=4
old/young	7.593	0.000769992	3.11351	1.94	0.162	1	1	inferred	Q9JJB1	Q9JJB1|T191C_MOUSE Transmembrane protein 191C OS=Mus musculus OX=10090 GN=Tmem191c PE=1 SV=2
old/young	-0.601	0.000899991	3.04576	2.27	0.162	3	34	inferred	P27773	P27773|PDIA3_MOUSE Protein disulfide-isomerase A3 OS=Mus musculus OX=10090 GN=Pdia3 PE=1 SV=2
old/young	1.988	0.00118999	2.92446	3	0.166	3	3	inferred	A2A5R2	A2A5R2|BIG2_MOUSE Brefeldin A-inhibited guanine nucleotide-exchange protein 2 OS=Mus musculus OX=10090 GN=Arfgef2 PE=1 SV=1
old/young	3.617	0.000879991	3.05552	2.21	0.17	2	1	inferred	P59016	P59016|VP33B_MOUSE Vacuolar protein sorting-associated protein 33B OS=Mus musculus OX=10090 GN=Vps33b PE=1 SV=1
old/young	-3.426	0.00114999	2.93931	2.89	0.17	3	1	inferred	Q9DB41	Q9DB41|GHC2_MOUSE Mitochondrial glutamate carrier 2 OS=Mus musculus OX=10090 GN=Slc25a18 PE=1 SV=4
old/young	1.21	0.00104999	2.97882	2.64	0.176	3	5	inferred	O08547	O08547|SC22B_MOUSE Vesicle-trafficking protein SEC22b OS=Mus musculus OX=10090 GN=Sec22b PE=1 SV=3
old/young	1.567	0.00111999	2.95079	2.82	0.176	3	2	inferred	Q80V26	Q80V26|IMPA3_MOUSE Inositol monophosphatase 3 OS=Mus musculus OX=10090 GN=Impad1 PE=1 SV=1
old/young	0.875	0.00164998	2.78252	4.15	0.219	3	8	inferred	Q9DB77	Q9DB77|QCR2_MOUSE Cytochrome b-c1 complex subunit 2, mitochondrial OS=Mus musculus OX=10090 GN=Uqcrc2 PE=1 SV=1
old/young	4.216	0.00177998	2.74958	4.48	0.224	2	1	unresolved	P70207;Q80UG2	P70207|PLXA2_MOUSE Plexin-A2 OS=Mus musculus OX=10090 GN=Plxna2 PE=1 SV=2
old/young	1.43	0.00199998	2.69897	5.03	0.24	3	3	inferred	P02535	P02535|K1C10_MOUSE Keratin, type I cytoskeletal 10 OS=Mus musculus OX=10090 GN=Krt10 PE=1 SV=3
old/young	2.852	0.00246832	2.6076	6.21	0.282	3	1	inferred	Q91YD9	Q91YD9|WASL_MOUSE Neural Wiskott-Aldrich syndrome protein OS=Mus musculus OX=10090 GN=Wasl PE=1 SV=1
old/young	-1.291	0.00270419	2.56796	6.81	0.284	3	2	inferred	O55026	O55026|ENTP2_MOUSE Ectonucleoside triphosphate diphosphohydrolase 2 OS=Mus musculus OX=10090 GN=Entpd2 PE=1 SV=2
old/young	0.726	0.0026901	2.57023	6.77	0.294	3	8	inferred	Q80ZW2	Q80ZW2|THEM6_MOUSE Protein THEM6 OS=Mus musculus OX=10090 GN=Them6 PE=1 SV=1
old/young	-0.451	0.00316661	2.4994	7.97	0.307	3	52	inferred	Q99104	Q99104|MYO5A_MOUSE Unconventional myosin-Va OS=Mus musculus OX=10090 GN=Myo5a PE=1 SV=2
old/young	0.691	0.00333327	2.47713	8.39	0.311	3	10	unresolved	P62835;Q99JI6	P62835|RAP1A_MOUSE Ras-related protein Rap-1A OS=Mus musculus OX=10090 GN=Rap1a PE=1 SV=1
old/young	-0.66	0.00309672	2.5091	7.79	0.312	3	7	unresolved	Q6PIC6;Q6PIE5;Q8VDN2;Q9WV27	Q6PIC6|AT1A3_MOUSE Sodium/potassium-transporting ATPase subunit alpha-3 OS=Mus musculus OX=10090 GN=Atp1a3 PE=1 SV=1
old/young	0.54	0.00438626	2.35791	11.04	0.394	3	16	inferred	Q6NXK7	Q6NXK7|DPP10_MOUSE Inactive dipeptidyl peptidase 10 OS=Mus musculus OX=10090 GN=Dpp10 PE=1 SV=1
old/young	-0.47	0.0050525	2.29649	12.72	0.397	3	23	inferred	Q922S4	Q922S4|PDE2A_MOUSE cGMP-dependent 3',5'-cyclic phosphodiesterase OS=Mus musculus OX=10090 GN=Pde2a PE=1 SV=4
old/young	2.186	0.00475598	2.32276	11.97	0.399	2	1	inferred	Q8VH51	Q8VH51|RBM39_MOUSE RNA-binding protein 39 OS=Mus musculus OX=10090 GN=Rbm39 PE=1 SV=2
old/young	-2.302	0.00459513	2.3377	11.57	0.399	2	1	inferred	D3YZ68	D3YZ68|D3YZ68_MOUSE Elongation factor 1-alpha 1 (Fragment) OS=Mus musculus OX=10090 GN=Eef1a1 PE=1 SV=1
old/young	0.603	0.00492295	2.30777	12.39	0.4	3	9	inferred	P04370-4	P04370-4|MBP_MOUSE Isoform 4 of Myelin basic protein OS=Mus musculus OX=10090 GN=Mbp
old/young	0.752	0.00558807	2.25274	14.07	0.426	3	5	unresolved	P63321;Q9JIW9	P63321|RALA_MOUSE Ras-related protein Ral-A OS=Mus musculus OX=10090 GN=Rala PE=1 SV=1
old/young	0.602	0.00616109	2.21034	15.51	0.443	3	7	inferred	Q80ZJ1	Q80ZJ1|RAP2A_MOUSE Ras-related protein Rap-2a OS=Mus musculus OX=10090 GN=Rap2a PE=1 SV=2
old/young	2.376	0.00603106	2.21961	15.18	0.446	3	1	inferred	Q9JIW9	Q9JIW9|RALB_MOUSE Ras-related protein Ral-B OS=Mus musculus OX=10090 GN=Ralb PE=1 SV=1
old/young	-0.738	0.00662046	2.17911	16.66	0.463	3	8	inferred	Q60625	Q60625|ICAM5_MOUSE Intercellular adhesion molecule 5 OS=Mus musculus OX=10090 GN=Icam5 PE=1 SV=2
old/young	-0.663	0.00699975	2.15492	17.62	0.464	3	10	inferred	P63038	P63038|CH60_MOUSE 60 kDa heat shock protein, mitochondrial OS=Mus musculus OX=10090 GN=Hspd1 PE=1 SV=1
old/young	-1.365	0.00692832	2.15937	17.44	0.471	3	1	unresolved	Q03137;Q61772	Q03137|EPHA4_MOUSE Ephrin type-A receptor 4 OS=Mus musculus OX=10090 GN=Epha4 PE=1 SV=2
old/young	-0.52	0.0112935	1.94717	28.43	0.474	3	11	unresolved	P17426;P17427	P17426|AP2A1_MOUSE AP-2 complex subunit alpha-1 OS=Mus musculus OX=10090 GN=Ap2a1 PE=1 SV=1
old/young	0.558	0.0118817	1.92512	29.91	0.475	3	11	inferred	Q9CWZ7	Q9CWZ7|SNAG_MOUSE Gamma-soluble NSF attachment protein OS=Mus musculus OX=10090 GN=Napg PE=1 SV=1
old/young	0.541	0.011764	1.92944	29.61	0.478	3	7	inferred	O70152	O70152|DPM1_MOUSE Dolichol-phosphate mannosyltransferase subunit 1 OS=Mus musculus OX=10090 GN=Dpm1 PE=1 SV=1
old/young	-0.963	0.00834746	2.07845	21.01	0.478	3	3	unresolved	Q3TXX4;Q8BLE7	Q3TXX4|VGLU1_MOUSE Vesicular glutamate transporter 1 OS=Mus musculus OX=10090 GN=Slc17a7 PE=1 SV=2
old/young	1.282	0.0121867	1.91411	30.67	0.479	3	1	inferred	Q9D920	Q9D920|BORC5_MOUSE BLOC-1-related complex subunit 5 OS=Mus musculus OX=10090 GN=Borcs5 PE=1 SV=1
old/young	-2.226	0.0112346	1.94944	28.28	0.479	2	1	inferred	Q8BX70	Q8BX70|VP13C_MOUSE Vacuolar protein sorting-associated protein 13C OS=Mus musculus OX=10090 GN=Vps13c PE=1 SV=2
old/young	-0.829	0.00821703	2.08528	20.68	0.481	3	4	inferred	Q8VCD6	Q8VCD6|REEP2_MOUSE Receptor expression-enhancing protein 2 OS=Mus musculus OX=10090 GN=Reep2 PE=1 SV=2
old/young	1.176	0.00881778	2.05464	22.19	0.482	3	2	inferred	Q8VHC3	Q8VHC3|SELM_MOUSE Selenoprotein M OS=Mus musculus OX=10090 GN=Selenom PE=1 SV=3
old/young	2.113	0.0124367	1.90529	31.3	0.482	2	1	inferred	Q61831	Q61831|MK10_MOUSE Mitogen-activated protein kinase 10 OS=Mus musculus OX=10090 GN=Mapk10 PE=1 SV=2
old/young	1.771	0.00767969	2.11466	19.33	0.483	3	1	inferred	Q9CPX7	Q9CPX7|RT16_MOUSE 28S ribosomal protein S16, mitochondrial OS=Mus musculus OX=10090 GN=Mrps16 PE=1 SV=1
old/young	0.604	0.0117052	1.93162	29.46	0.483	3	8	inferred	P21278	P21278|GNA11_MOUSE Guanine nucleotide-binding protein subunit alpha-11 OS=Mus musculus OX=10090 GN=Gna11 PE=1 SV=1
old/young	-1.954	0.0107772	1.96749	27.13	0.484	2	1	inferred	Q8VHK9	Q8VHK9|DHX36_MOUSE ATP-dependent RNA helicase DHX36 OS=Mus musculus OX=10090 GN=Dhx36 PE=1 SV=2
old/young	0.933	0.0111758	1.95172	28.13	0.485	3	3	inferred	Q8K221	Q8K221|ARFP2_MOUSE Arfaptin-2 OS=Mus musculus OX=10090 GN=Arfip2 PE=1 SV=2
old/young	0.68	0.0106836	1.97128	26.89	0.489	3	5	inferred	Q9CZX8	Q9CZX8|RS19_MOUSE 40S ribosomal protein S19 OS=Mus musculus OX=10090 GN=Rps19 PE=1 SV=3
old/young	-0.864	0.007958	2.0992	20.03	0.489	3	5	inferred	P15209	P15209|NTRK2_MOUSE BDNF/NT-3 growth factors receptor OS=Mus musculus OX=10090 GN=Ntrk2 PE=1 SV=1
old/young	0.953	0.00821703	2.08528	20.68	0.492	3	2	inferred	Q9CX00	Q9CX00|IST1_MOUSE IST1 homolog OS=Mus musculus OX=10090 GN=Ist1 PE=1 SV=1
old/young	-0.979	0.00763969	2.11692	19.23	0.493	3	3	inferred	Q9D0I9	Q9D0I9|SYRC_MOUSE Arginine--tRNA ligase, cytoplasmic OS=Mus musculus OX=10090 GN=Rars PE=1 SV=2
old/young	-0.844	0.00881778	2.05464	22.19	0.493	3	3	inferred	Q62188	Q62188|DPYL3_MOUSE Dihydropyrimidinase-related protein 3 OS=Mus musculus OX=10090 GN=Dpysl3 PE=1 SV=1
old/young	0.929	0.0111758	1.95172	28.13	0.494	3	2	inferred	Q9D6J6	Q9D6J6|NDUV2_MOUSE NADH dehydrogenase [ubiquinone] flavoprotein 2, mitochondrial OS=Mus musculus OX=10090 GN=Ndufv2 PE=1 SV=2
old/young	1.362	0.0106105	1.97426	26.71	0.495	3	1	inferred	P70227	P70227|ITPR3_MOUSE Inositol 1,4,5-trisphosphate receptor type 3 OS=Mus musculus OX=10090 GN=Itpr3 PE=1 SV=3
old/young	-1.281	0.00933289	2.02998	23.49	0.5	3	1	unresolved	P63318;P68404-2;Q4VA93	P63318|KPCG_MOUSE Protein kinase C gamma type OS=Mus musculus OX=10090 GN=Prkcg PE=1 SV=1
old/young	-1.481	0.0105784	1.97558	26.63	0.502	3	2	inferred	Q6IRU5	Q6IRU5|CLCB_MOUSE Clathrin light chain B OS=Mus musculus OX=10090 GN=Cltb PE=1 SV=1
old/young	1.332	0.00964952	2.01549	24.29	0.506	3	1	inferred	Q9CQA3	Q9CQA3|SDHB_MOUSE Succinate dehydrogenase [ubiquinone] iron-sulfur subunit, mitochondrial OS=Mus musculus OX=10090 GN=Sdhb PE=1 SV=1
old/young	-0.553	0.0104994	1.97883	26.43	0.508	3	10	inferred	Q8BJI1	Q8BJI1|S6A17_MOUSE Sodium-dependent neutral amino acid transporter SLC6A17 OS=Mus musculus OX=10090 GN=Slc6a17 PE=1 SV=1
old/young	-1.567	0.0137133	1.86286	34.52	0.508	2	1	inferred	Q3UHC1	Q3UHC1|Q3UHC1_MOUSE Rap guanine nucleotide exchange factor (GEF) 1 OS=Mus musculus OX=10090 GN=Rapgef1 PE=1 SV=1
old/young	0.872	0.0136419	1.86513	34.34	0.512	3	2	inferred	O35927	O35927|CTND2_MOUSE Catenin delta-2 OS=Mus musculus OX=10090 GN=Ctnnd2 PE=1 SV=1
old/young	1.595	0.013499	1.8697	33.98	0.515	3	1	inferred	P17665	P17665|COX7C_MOUSE Cytochrome c oxidase subunit 7C, mitochondrial OS=Mus musculus OX=10090 GN=Cox7c PE=1 SV=1
old/young	0.984	0.0104731	1.97992	26.36	0.517	3	2	inferred	Q91Z92	Q91Z92|B3GT6_MOUSE Beta-1,3-galactosyltransferase 6 OS=Mus musculus OX=10090 GN=B3galt6 PE=2 SV=1
old/young	0.921	0.0103679	1.98431	26.1	0.522	3	2	inferred	Q91VU0	Q91VU0|FAM3C_MOUSE Protein FAM3C OS=Mus musculus OX=10090 GN=Fam3c PE=1 SV=1
old/young	0.668	0.0174985	1.757	44.04	0.524	3	4	inferred	O35409	O35409|FOLH1_MOUSE Glutamate carboxypeptidase 2 OS=Mus musculus OX=10090 GN=Folh1 PE=1 SV=2
old/young	2.609	0.0186347	1.72968	46.9	0.527	1	1	inferred	Q924Z4	Q924Z4|CERS2_MOUSE Ceramide synthase 2 OS=Mus musculus OX=10090 GN=Cers2 PE=1 SV=1
old/young	-1.172	0.0184529	1.73394	46.45	0.528	3	1	inferred	Q9D0R2	Q9D0R2|SYTC_MOUSE Threonine--tRNA ligase, cytoplasmic OS=Mus musculus OX=10090 GN=Tars PE=1 SV=2
old/young	0.622	0.017453	1.75813	43.93	0.529	3	6	inferred	Q9CR51	Q9CR51|VATG1_MOUSE V-type proton ATPase subunit G 1 OS=Mus musculus OX=10090 GN=Atp6v1g1 PE=1 SV=3
old/young	-0.391	0.0180893	1.74258	45.53	0.529	3	50	inferred	P50516	P50516|VATA_MOUSE V-type proton ATPase catalytic subunit A OS=Mus musculus OX=10090 GN=Atp6v1a PE=1 SV=2
old/young	0.668	0.0145373	1.83751	36.59	0.53	3	8	inferred	Q9JHZ2	Q9JHZ2|ANKH_MOUSE Progressive ankylosis protein OS=Mus musculus OX=10090 GN=Ankh PE=2 SV=1
old/young	-3.375	0.0103152	1.98652	25.96	0.53	1	1	inferred	P09240	P09240|CCKN_MOUSE Cholecystokinin OS=Mus musculus OX=10090 GN=Cck PE=1 SV=3
old/young	-2.074	0.023997	1.61984	60.4	0.53	3	1	unresolved	O54829;Q9Z2H2	O54829|RGS7_MOUSE Regulator of G-protein signaling 7 OS=Mus musculus OX=10090 GN=Rgs7 PE=1 SV=2
old/young	-1.577	0.018362	1.73608	46.22	0.531	2	1	inferred	Q60864	Q60864|STIP1_MOUSE Stress-induced-phosphoprotein 1 OS=Mus musculus OX=10090 GN=Stip1 PE=1 SV=1
old/young	0.949	0.0179984	1.74477	45.3	0.533	3	3	inferred	Q6NS82	Q6NS82|RETR2_MOUSE Reticulophagy regulator 2 OS=Mus musculus OX=10090 GN=Retreg2 PE=1 SV=2
old/young	0.573	0.0243306	1.61385	61.24	0.533	3	5	inferred	Q8VDP6	Q8VDP6|CDIPT_MOUSE CDP-diacylglycerol--inositol 3-phosphatidyltransferase OS=Mus musculus OX=10090 GN=Cdipt PE=1 SV=1
old/young	-0.845	0.0234971	1.62899	59.14	0.533	3	2	inferred	A2AGL3	A2AGL3|RYR3_MOUSE Ryanodine receptor 3 OS=Mus musculus OX=10090 GN=Ryr3 PE=1 SV=1
old/young	-1.257	0.023997	1.61984	60.4	0.535	2	1	inferred	rev_Q8R1N0	Q8R1N0|ZN830_MOUSE reversed Zinc finger protein 830 OS=Mus musculus OX=10090 GN=Znf830 PE=1 SV=1
old/young	0.439	0.0234418	1.63001	59	0.536	3	9	inferred	Q9WTT4	Q9WTT4|VATG2_MOUSE V-type proton ATPase subunit G 2 OS=Mus musculus OX=10090 GN=Atp6v1g2 PE=1 SV=1
old/young	0.494	0.023872	1.62211	60.09	0.536	3	8	inferred	Q6GQT9	Q6GQT9|NOMO1_MOUSE Nodal modulator 1 OS=Mus musculus OX=10090 GN=Nomo1 PE=1 SV=1
old/young	-0.733	0.017453	1.75813	43.93	0.536	3	3	inferred	Q8R066	Q8R066|C1QT4_MOUSE Complement C1q tumor necrosis factor-related protein 4 OS=Mus musculus OX=10090 GN=C1qtnf4 PE=1 SV=1
old/young	0.578	0.0149219	1.82618	37.56	0.537	3	6	inferred	Q9CQX2	Q9CQX2|CYB5B_MOUSE Cytochrome b5 type B OS=Mus musculus OX=10090 GN=Cyb5b PE=1 SV=1
old/young	1.299	0.0247469	1.60648	62.29	0.537	3	1	inferred	Q921G7	Q921G7|ETFD_MOUSE Electron transfer flavoprotein-ubiquinone oxidoreductase, mitochondrial OS=Mus musculus OX=10090 GN=Etfdh PE=1 SV=1
old/young	0.651	0.0156142	1.80648	39.3	0.538	3	3	inferred	Q9EP72	Q9EP72|EMC7_MOUSE ER membrane protein complex subunit 7 OS=Mus musculus OX=10090 GN=Emc7 PE=1 SV=1
old/young	-1.379	0.0233307	1.63207	58.72	0.539	2	1	inferred	Q7TME0	Q7TME0|PLPR4_MOUSE Phospholipid phosphatase-related protein type 4 OS=Mus musculus OX=10090 GN=Plppr4 PE=1 SV=2
old/young	0.515	0.0167486	1.77602	42.16	0.54	3	8	inferred	P84096	P84096|RHOG_MOUSE Rho-related GTP-binding protein RhoG OS=Mus musculus OX=10090 GN=Rhog PE=1 SV=1
old/young	-0.84	0.0152296	1.81731	38.33	0.54	3	2	inferred	Q80UW2	Q80UW2|FBX2_MOUSE F-box only protein 2 OS=Mus musculus OX=10090 GN=Fbxo2 PE=1 SV=1
old/young	-2.164	0.0154603	1.81078	38.91	0.54	1	1	inferred	A1L3T7	A1L3T7|RIPR3_MOUSE RIPOR family member 3 OS=Mus musculus OX=10090 GN=Ripor3 PE=1 SV=1
old/young	0.469	0.022553	1.64679	56.77	0.541	3	8	inferred	P35293	P35293|RAB18_MOUSE Ras-related protein Rab-18 OS=Mus musculus OX=10090 GN=Rab18 PE=1 SV=2
old/young	-0.525	0.016582	1.78036	41.74	0.542	3	9	unresolved	A0A1Y7VK09;E9Q401	A0A1Y7VK09|A0A1Y7VK09_MOUSE Ryanodine receptor 2 (Fragment) OS=Mus musculus OX=10090 GN=Ryr2 PE=1 SV=1
old/young	-0.836	0.017453	1.75813	43.93	0.542	3	2	inferred	P47962	P47962|RL5_MOUSE 60S ribosomal protein L5 OS=Mus musculus OX=10090 GN=Rpl5 PE=1 SV=3
old/young	0.709	0.0172712	1.76268	43.47	0.543	3	4	inferred	Q62086	Q62086|PON2_MOUSE Serum paraoxonase/arylesterase 2 OS=Mus musculus OX=10090 GN=Pon2 PE=1 SV=2
old/young	0.58	0.022442	1.64894	56.49	0.543	3	4	inferred	Q9R0P9	Q9R0P9|UCHL1_MOUSE Ubiquitin carboxyl-terminal hydrolase isozyme L1 OS=Mus musculus OX=10090 GN=Uchl1 PE=1 SV=1
old/young	-0.478	0.0228863	1.64042	57.6	0.543	3	27	unresolved	E9Q401;Q80ZZ5	E9Q401|RYR2_MOUSE Ryanodine receptor 2 OS=Mus musculus OX=10090 GN=Ryr2 PE=1 SV=1
old/young	-0.534	0.0252468	1.59779	63.55	0.543	3	6	inferred	P80318	P80318|TCPG_MOUSE T-complex protein 1 subunit gamma OS=Mus musculus OX=10090 GN=Cct3 PE=1 SV=1
old/young	0.58	0.0231085	1.63623	58.16	0.544	3	5	inferred	O35639	O35639|ANXA3_MOUSE Annexin A3 OS=Mus musculus OX=10090 GN=Anxa3 PE=1 SV=4
old/young	0.486	0.0233307	1.63207	58.72	0.544	3	8	inferred	Q8BFZ9	Q8BFZ9|ERLN2_MOUSE Erlin-2 OS=Mus musculus OX=10090 GN=Erlin2 PE=1 SV=1
old/young	-0.459	0.0170894	1.76727	43.01	0.544	3	15	inferred	P80317	P80317|TCPZ_MOUSE T-complex protein 1 subunit zeta OS=Mus musculus OX=10090 GN=Cct6a PE=1 SV=3
old/young	-0.52	0.0162486	1.78918	40.9	0.545	3	10	inferred	Q14BI2	Q14BI2|GRM2_MOUSE Metabotropic glutamate receptor 2 OS=Mus musculus OX=10090 GN=Grm2 PE=1 SV=2
old/young	1.699	0.0164986	1.78255	41.53	0.546	2	1	inferred	Q9JJR8	Q9JJR8|TMM9B_MOUSE Transmembrane protein 9B OS=Mus musculus OX=10090 GN=Tmem9b PE=1 SV=1
old/young	0.579	0.016082	1.79366	40.48	0.547	3	6	inferred	Q3THE2	Q3THE2|ML12B_MOUSE Myosin regulatory light chain 12B OS=Mus musculus OX=10090 GN=Myl12b PE=1 SV=2
old/young	-0.409	0.0195437	1.70899	49.19	0.547	3	16	inferred	Q76MZ3	Q76MZ3|2AAA_MOUSE Serine/threonine-protein phosphatase 2A 65 kDa regulatory subunit A alpha isoform OS=Mus musculus OX=10090 GN=Ppp2r1a PE=1 SV=3
old/young	-0.405	0.022442	1.64894	56.49	0.548	3	28	inferred	P17427	P17427|AP2A2_MOUSE AP-2 complex subunit alpha-2 OS=Mus musculus OX=10090 GN=Ap2a2 PE=1 SV=2
old/young	-1.69	0.0269961	1.5687	67.95	0.548	1	1	inferred	P52623	P52623|UCK1_MOUSE Uridine-cytidine kinase 1 OS=Mus musculus OX=10090 GN=Uck1 PE=1 SV=2
old/young	0.608	0.0277103	1.55736	69.75	0.549	3	3	inferred	P61226	P61226|RAP2B_MOUSE Ras-related protein Rap-2b OS=Mus musculus OX=10090 GN=Rap2b PE=1 SV=1
old/young	-0.344	0.0257468	1.58928	64.8	0.549	3	46	inferred	Q6PIC6	Q6PIC6|AT1A3_MOUSE Sodium/potassium-transporting ATPase subunit alpha-3 OS=Mus musculus OX=10090 GN=Atp1a3 PE=1 SV=1
old/young	-1.252	0.0266217	1.57476	67.01	0.549	3	1	unresolved	A0A1L1SV25;Q7TPR4;Q9JI91	A0A1L1SV25|A0A1L1SV25_MOUSE Alpha-actinin-4 OS=Mus musculus OX=10090 GN=Actn4 PE=1 SV=1
old/young	0.695	0.0259968	1.58508	65.43	0.55	3	2	inferred	Q8K0T0	Q8K0T0|RTN1_MOUSE Reticulon-1 OS=Mus musculus OX=10090 GN=Rtn1 PE=1 SV=1
old/young	0.646	0.0268533	1.571	67.59	0.55	3	4	inferred	Q7TN79	Q7TN79|AKA7G_MOUSE A-kinase anchor protein 7 isoform gamma OS=Mus musculus OX=10090 GN=Akap7 PE=1 SV=2
old/young	0.745	0.0221087	1.65544	55.65	0.551	3	2	inferred	E9Q0F0	E9Q0F0|E9Q0F0_MOUSE Keratin 78 OS=Mus musculus OX=10090 GN=Krt78 PE=1 SV=1
old/young	1.844	0.0274247	1.56186	69.03	0.552	1	1	inferred	P28667	P28667|MRP_MOUSE MARCKS-related protein OS=Mus musculus OX=10090 GN=Marcksl1 PE=1 SV=2
old/young	0.86	0.0211088	1.67554	53.13	0.553	3	3	inferred	Q9ERL9	Q9ERL9|GCYA1_MOUSE Guanylate cyclase soluble subunit alpha-1 OS=Mus musculus OX=10090 GN=Gucy1a1 PE=1 SV=2
old/young	0.935	0.0265676	1.57565	66.87	0.553	3	2	inferred	Q5ND34	Q5ND34|WDR81_MOUSE WD repeat-containing protein 81 OS=Mus musculus OX=10090 GN=Wdr81 PE=1 SV=2
old/young	-0.997	0.0208866	1.68013	52.57	0.553	3	1	unresolved	P68368;P68369	P68368|TBA4A_MOUSE Tubulin alpha-4A chain OS=Mus musculus OX=10090 GN=Tuba4a PE=1 SV=1
old/young	1.084	0.021331	1.67099	53.69	0.554	3	1	inferred	Q9DCF9	Q9DCF9|SSRG_MOUSE Translocon-associated protein subunit gamma OS=Mus musculus OX=10090 GN=Ssr3 PE=1 SV=1
old/young	1.073	0.022442	1.64894	56.49	0.554	3	1	inferred	Q9ES89	Q9ES89|EXTL2_MOUSE Exostosin-like 2 OS=Mus musculus OX=10090 GN=Extl2 PE=1 SV=1
old/young	0.743	0.0277103	1.55736	69.75	0.554	3	4	inferred	Q9D7G0	Q9D7G0|PRPS1_MOUSE Ribose-phosphate pyrophosphokinase 1 OS=Mus musculus OX=10090 GN=Prps1 PE=1 SV=4
old/young	-2.46	0.0219976	1.65763	55.37	0.554	1	1	inferred	Q0II04	Q0II04|NEBL_MOUSE Nebulette OS=Mus musculus OX=10090 GN=Nebl PE=1 SV=1
old/young	-0.501	0.0207755	1.68245	52.29	0.556	3	11	inferred	Q8VEK3	Q8VEK3|HNRPU_MOUSE Heterogeneous nuclear ribonucleoprotein U OS=Mus musculus OX=10090 GN=Hnrnpu PE=1 SV=1
old/young	-0.91	0.0282817	1.54849	71.18	0.556	3	3	unresolved	B2RSH2;P08752;P18872-2;Q9DC51	B2RSH2|GNAI1_MOUSE Guanine nucleotide-binding protein G(i) subunit alpha-1 OS=Mus musculus OX=10090 GN=Gnai1 PE=1 SV=1
old/young	0.491	0.0205979	1.68618	51.85	0.557	3	9	inferred	P27601	P27601|GNA13_MOUSE Guanine nucleotide-binding protein subunit alpha-13 OS=Mus musculus OX=10090 GN=Gna13 PE=1 SV=1
old/young	0.406	0.0265676	1.57565	66.87	0.557	3	18	inferred	Q99LR1	Q99LR1|ABD12_MOUSE Monoacylglycerol lipase ABHD12 OS=Mus musculus OX=10090 GN=Abhd12 PE=1 SV=2
old/young	1.81	0.0219976	1.65763	55.37	0.559	2	1	inferred	Q8K083	Q8K083|ZN536_MOUSE Zinc finger protein 536 OS=Mus musculus OX=10090 GN=Znf536 PE=2 SV=1
old/young	-1.094	0.0217754	1.66203	54.81	0.559	3	1	unresolved	P48722;Q61316;Q61699	P48722|HS74L_MOUSE Heat shock 70 kDa protein 4L OS=Mus musculus OX=10090 GN=Hspa4l PE=1 SV=2
old/young	-0.578	0.0287102	1.54196	72.26	0.56	3	5	inferred	A2AUK5	A2AUK5|A2AUK5_MOUSE Band 4.1-like protein 1 OS=Mus musculus OX=10090 GN=Epb41l1 PE=1 SV=1
old/young	2.45	0.020498	1.68829	51.59	0.561	1	1	inferred	Q3UZV7	Q3UZV7|K132L_MOUSE UPF0577 protein KIAA1324-like homolog OS=Mus musculus OX=10090 PE=1 SV=1
old/young	-0.879	0.020298	1.69255	51.09	0.561	3	2	inferred	P16858	P16858|G3P_MOUSE Glyceraldehyde-3-phosphate dehydrogenase OS=Mus musculus OX=10090 GN=Gapdh PE=1 SV=2
old/young	0.708	0.0904548	1.04357	227.67	0.565	2	2	inferred	Q921S7	Q921S7|RM37_MOUSE 39S ribosomal protein L37, mitochondrial OS=Mus musculus OX=10090 GN=Mrpl37 PE=1 SV=1
old/young	0.621	0.0904548	1.04357	227.67	0.566	3	1	inferred	P59644	P59644|PI5PA_MOUSE Phosphatidylinositol 4,5-bisphosphate 5-phosphatase A OS=Mus musculus OX=10090 GN=Inpp5j PE=1 SV=2
old/young	0.372	0.0914543	1.0388	230.19	0.566	3	8	inferred	Q62465	Q62465|VAT1_MOUSE Synaptic vesicle membrane protein VAT-1 homolog OS=Mus musculus OX=10090 GN=Vat1 PE=1 SV=3
old/young	-0.403	0.08997	1.0459	226.45	0.566	3	9	inferred	Q8BLQ9	Q8BLQ9|CADM2_MOUSE Cell adhesion molecule 2 OS=Mus musculus OX=10090 GN=Cadm2 PE=1 SV=2
old/young	-0.524	0.091954	1.03643	231.45	0.566	3	3	inferred	Q9EPL8	Q9EPL8|IPO7_MOUSE Importin-7 OS=Mus musculus OX=10090 GN=Ipo7 PE=1 SV=2
old/young	0.363	0.089955	1.04597	226.42	0.567	3	6	inferred	P63044	P63044|VAMP2_MOUSE Vesicle-associated membrane protein 2 OS=Mus musculus OX=10090 GN=Vamp2 PE=1 SV=2
old/young	0.355	0.0913029	1.03952	229.81	0.567	3	5	inferred	Q64444	Q64444|CAH4_MOUSE Carbonic anhydrase 4 OS=Mus musculus OX=10090 GN=Ca4 PE=1 SV=1
old/young	0.537	0.0914543	1.0388	230.19	0.567	3	2	inferred	P16388	P16388|KCNA1_MOUSE Potassium voltage-gated channel subfamily A member 1 OS=Mus musculus OX=10090 GN=Kcna1 PE=1 SV=1
old/young	0.421	0.091954	1.03643	231.45	0.567	3	4	inferred	Q9CZ42	Q9CZ42|NNRD_MOUSE ATP-dependent (S)-NAD(P)H-hydrate dehydratase OS=Mus musculus OX=10090 GN=Naxd PE=1 SV=1
old/young	-0.728	0.0903032	1.0443	227.29	0.567	3	1	inferred	Q5F2E8	Q5F2E8|TAOK1_MOUSE Serine/threonine-protein kinase TAO1 OS=Mus musculus OX=10090 GN=Taok1 PE=1 SV=1
old/young	-0.534	0.0909545	1.04118	228.93	0.567	3	3	inferred	Q99JG2	Q99JG2|ETBR2_MOUSE Prosaposin receptor GPR37L1 OS=Mus musculus OX=10090 GN=Gpr37l1 PE=1 SV=2
old/young	0.604	0.089955	1.04597	226.42	0.569	3	1	unresolved	P62484;Q8CBW3	P62484|ABI2_MOUSE Abl interactor 2 OS=Mus musculus OX=10090 GN=Abi2 PE=1 SV=1
old/young	0.703	0.0856381	1.06733	215.55	0.57	2	2	inferred	Q923G2	Q923G2|RPAB3_MOUSE DNA-directed RNA polymerases I, II, and III subunit RPABC3 OS=Mus musculus OX=10090 GN=Polr2h PE=1 SV=3
old/young	0.563	0.0896368	1.04751	225.62	0.57	3	2	inferred	Q921E2	Q921E2|RAB31_MOUSE Ras-related protein Rab-31 OS=Mus musculus OX=10090 GN=Rab31 PE=1 SV=1
old/young	0.772	0.089955	1.04597	226.42	0.57	3	1	inferred	Q8BGF8	Q8BGF8|S35D3_MOUSE Solute carrier family 35 member D3 OS=Mus musculus OX=10090 GN=Slc35d3 PE=2 SV=1
old/young	-0.341	0.0894553	1.04839	225.16	0.57	3	10	inferred	P07356	P07356|ANXA2_MOUSE Annexin A2 OS=Mus musculus OX=10090 GN=Anxa2 PE=1 SV=2
old/young	0.7	0.0893036	1.04913	224.78	0.571	3	1	inferred	Q9DCA2	Q9DCA2|RT11_MOUSE 28S ribosomal protein S11, mitochondrial OS=Mus musculus OX=10090 GN=Mrps11 PE=1 SV=2
old/young	0.477	0.0929535	1.03173	233.96	0.571	3	3	inferred	Q9D0M1	Q9D0M1|KPRA_MOUSE Phosphoribosyl pyrophosphate synthase-associated protein 1 OS=Mus musculus OX=10090 GN=Prpsap1 PE=1 SV=1
old/young	0.355	0.0934533	1.02941	235.22	0.571	3	11	inferred	O55234	O55234|PSB5_MOUSE Proteasome subunit beta type-5 OS=Mus musculus OX=10090 GN=Psmb5 PE=1 SV=3
old/young	0.316	0.093953	1.02709	236.48	0.571	3	12	inferred	O55022	O55022|PGRC1_MOUSE Membrane-associated progesterone receptor component 1 OS=Mus musculus OX=10090 GN=Pgrmc1 PE=1 SV=4
old/young	-0.709	0.0889703	1.05075	223.94	0.571	3	1	inferred	Q62093	Q62093|SRSF2_MOUSE Serine/arginine-rich splicing factor 2 OS=Mus musculus OX=10090 GN=Srsf2 PE=1 SV=4
old/young	0.444	0.0886371	1.05238	223.1	0.572	3	4	unresolved	P08556;P32883-2;Q61411	P08556|RASN_MOUSE GTPase NRas OS=Mus musculus OX=10090 GN=Nras PE=1 SV=1
old/young	0.647	0.0893036	1.04913	224.78	0.572	3	1	inferred	P51174	P51174|ACADL_MOUSE Long-chain specific acyl-CoA dehydrogenase, mitochondrial OS=Mus musculus OX=10090 GN=Acadl PE=1 SV=2
old/young	0.69	0.0934533	1.02941	235.22	0.572	3	1	inferred	Q3V0K9	Q3V0K9|PLSI_MOUSE Plastin-1 OS=Mus musculus OX=10090 GN=Pls1 PE=1 SV=1
old/young	-0.514	0.0856381	1.06733	215.55	0.572	3	3	inferred	P06801	P06801|MAOX_MOUSE NADP-dependent malic enzyme OS=Mus musculus OX=10090 GN=Me1 PE=1 SV=2
old/young	0.371	0.0846385	1.07243	213.03	0.573	3	6	inferred	P01831	P01831|THY1_MOUSE Thy-1 membrane glycoprotein OS=Mus musculus OX=10090 GN=Thy1 PE=1 SV=1
old/young	0.385	0.0856381	1.06733	215.55	0.573	3	9	inferred	Q9D1D4	Q9D1D4|TMEDA_MOUSE Transmembrane emp24 domain-containing protein 10 OS=Mus musculus OX=10090 GN=Tmed10 PE=1 SV=1
old/young	0.56	0.0889555	1.05083	223.9	0.573	3	2	inferred	Q3UBX0	Q3UBX0|TM109_MOUSE Transmembrane protein 109 OS=Mus musculus OX=10090 GN=Tmem109 PE=1 SV=2
old/young	0.507	0.093953	1.02709	236.48	0.573	3	2	inferred	Q9D164	Q9D164|FXYD6_MOUSE FXYD domain-containing ion transport regulator 6 OS=Mus musculus OX=10090 GN=Fxyd6 PE=1 SV=2
old/young	-0.523	0.0853049	1.06903	214.71	0.573	3	2	unresolved	Q6P9K9;Q9CS84	Q6P9K9|NRX3A_MOUSE Neurexin-3 OS=Mus musculus OX=10090 GN=Nrxn3 PE=1 SV=2
old/young	0.481	0.0298529	1.52501	75.14	0.574	3	7	inferred	Q8CA95-3	Q8CA95-3|PDE10_MOUSE Isoform 3 of cAMP and cAMP-inhibited cGMP 3',5'-cyclic phosphodiesterase 10A OS=Mus musculus OX=10090 GN=Pde10a
old/young	0.585	0.0843052	1.07415	212.2	0.574	3	2	inferred	Q9JL62	Q9JL62|GLTP_MOUSE Glycolipid transfer protein OS=Mus musculus OX=10090 GN=Gltp PE=1 SV=3
old/young	0.479	0.0846385	1.07243	213.03	0.574	3	4	inferred	P62911	P62911|RL32_MOUSE 60S ribosomal protein L32 OS=Mus musculus OX=10090 GN=Rpl32 PE=1 SV=2
old/young	0.91	0.0886371	1.05238	223.1	0.574	2	1	inferred	F8VPN4	F8VPN4|F8VPN4_MOUSE Amylo-1,6-glucosidase, 4-alpha-glucanotransferase OS=Mus musculus OX=10090 GN=Agl PE=1 SV=1
old/young	-0.468	0.083972	1.07587	211.36	0.574	3	5	inferred	Q6ZQI3	Q6ZQI3|MLEC_MOUSE Malectin OS=Mus musculus OX=10090 GN=Mlec PE=1 SV=2
old/young	-0.843	0.0853049	1.06903	214.71	0.574	2	1	inferred	O08919	O08919|NUMBL_MOUSE Numb-like protein OS=Mus musculus OX=10090 GN=Numbl PE=1 SV=3
old/young	1.056	0.02971	1.5271	74.78	0.575	3	1	inferred	P0DN89	P0DN89|T254A_MOUSE Transmembrane protein 254 OS=Mus musculus OX=10090 GN=Tmem254a PE=1 SV=1
old/young	0.408	0.074975	1.12508	188.71	0.575	3	5	inferred	Q9CQA1	Q9CQA1|TPPC5_MOUSE Trafficking protein particle complex subunit 5 OS=Mus musculus OX=10090 GN=Trappc5 PE=1 SV=1
old/young	0.296	0.0843052	1.07415	212.2	0.575	3	16	inferred	Q9EPR5	Q9EPR5|SORC2_MOUSE VPS10 domain-containing receptor SorCS2 OS=Mus musculus OX=10090 GN=Sorcs2 PE=1 SV=2
old/young	-0.742	0.0886371	1.05238	223.1	0.575	3	1	inferred	B0F2B4	B0F2B4|NLGN4_MOUSE Neuroligin 4-like OS=Mus musculus OX=10090 GN=Nlgn4l PE=1 SV=1
old/young	0.434	0.0736421	1.13287	185.36	0.576	3	8	inferred	Q9CZU6	Q9CZU6|CISY_MOUSE Citrate synthase, mitochondrial OS=Mus musculus OX=10090 GN=Cs PE=1 SV=1
old/young	0.392	0.0739753	1.13091	186.2	0.576	3	9	inferred	O54734	O54734|OST48_MOUSE Dolichyl-diphosphooligosaccharide--protein glycosyltransferase 48 kDa subunit OS=Mus musculus OX=10090 GN=Ddost PE=1 SV=2
old/young	0.393	0.0746418	1.12702	187.87	0.576	3	6	unresolved	Q8VEH3;Q9CQW2	Q8VEH3|ARL8A_MOUSE ADP-ribosylation factor-like protein 8A OS=Mus musculus OX=10090 GN=Arl8a PE=1 SV=1
old/young	0.46	0.083972	1.07587	211.36	0.576	3	5	inferred	Q9R1P1	Q9R1P1|PSB3_MOUSE Proteasome subunit beta type-3 OS=Mus musculus OX=10090 GN=Psmb3 PE=1 SV=1
old/young	0.573	0.0853049	1.06903	214.71	0.576	3	1	inferred	Q9ER00	Q9ER00|STX12_MOUSE Syntaxin-12 OS=Mus musculus OX=10090 GN=Stx12 PE=1 SV=1
old/young	0.503	0.0886371	1.05238	223.1	0.576	3	5	inferred	Q9QY76	Q9QY76|VAPB_MOUSE Vesicle-associated membrane protein-associated protein B OS=Mus musculus OX=10090 GN=Vapb PE=1 SV=3
old/young	0.463	0.0949525	1.02249	239	0.576	3	3	inferred	Q7M6W1	Q7M6W1|Q7M6W1_MOUSE Reticulon OS=Mus musculus OX=10090 GN=Rtn1 PE=1 SV=1
old/young	0.424	0.0743086	1.12896	187.03	0.577	3	6	inferred	O88343	O88343|S4A4_MOUSE Electrogenic sodium bicarbonate cotransporter 1 OS=Mus musculus OX=10090 GN=Slc4a4 PE=1 SV=2
old/young	-0.542	0.0736421	1.13287	185.36	0.577	3	2	inferred	P35282	P35282|RAB21_MOUSE Ras-related protein Rab-21 OS=Mus musculus OX=10090 GN=Rab21 PE=1 SV=4
old/young	-0.415	0.074975	1.12508	188.71	0.577	3	9	inferred	Q78ZA7	Q78ZA7|NP1L4_MOUSE Nucleosome assembly protein 1-like 4 OS=Mus musculus OX=10090 GN=Nap1l4 PE=1 SV=1
old/young	-0.324	0.083972	1.07587	211.36	0.577	3	16	inferred	P62908	P62908|RS3_MOUSE 40S ribosomal protein S3 OS=Mus musculus OX=10090 GN=Rps3 PE=1 SV=1
old/young	-0.54	0.0884558	1.05327	222.64	0.577	3	6	inferred	Q69ZK0	Q69ZK0|PREX1_MOUSE Phosphatidylinositol 3,4,5-trisphosphate-dependent Rac exchanger 1 protein OS=Mus musculus OX=10090 GN=Prex1 PE=1 SV=2
old/young	0.704	0.0746418	1.12702	187.87	0.578	3	1	inferred	Q8BSY0	Q8BSY0|ASPH_MOUSE Aspartyl/asparaginyl beta-hydroxylase OS=Mus musculus OX=10090 GN=Asph PE=1 SV=1
old/young	0.521	0.0836388	1.07759	210.52	0.578	3	4	inferred	Q9R0P6	Q9R0P6|SC11A_MOUSE Signal peptidase complex catalytic subunit SEC11A OS=Mus musculus OX=10090 GN=Sec11a PE=1 SV=1
old/young	0.425	0.0884558	1.05327	222.64	0.578	3	6	inferred	Q61548	Q61548|AP180_MOUSE Clathrin coat assembly protein AP180 OS=Mus musculus OX=10090 GN=Snap91 PE=1 SV=1
old/young	0.506	0.0954523	1.02021	240.25	0.578	3	2	inferred	Q99JH8	Q99JH8|ERD21_MOUSE ER lumen protein-retaining receptor 1 OS=Mus musculus OX=10090 GN=Kdelr1 PE=1 SV=1
old/young	0.375	0.083972	1.07587	211.36	0.579	3	10	inferred	P08752	P08752|GNAI2_MOUSE Guanine nucleotide-binding protein G(i) subunit alpha-2 OS=Mus musculus OX=10090 GN=Gnai2 PE=1 SV=5
old/young	-1.6	0.0736421	1.13287	185.36	0.579	1	1	inferred	Q920L1	Q920L1|FADS1_MOUSE Fatty acid desaturase 1 OS=Mus musculus OX=10090 GN=Fads1 PE=1 SV=1
old/young	0.392	0.0733089	1.13484	184.52	0.58	3	8	inferred	Q60605	Q60605|MYL6_MOUSE Myosin light polypeptide 6 OS=Mus musculus OX=10090 GN=Myl6 PE=1 SV=3
old/young	0.401	0.0884558	1.05327	222.64	0.58	3	7	inferred	Q8BYI8	Q8BYI8|F234B_MOUSE Protein FAM234B OS=Mus musculus OX=10090 GN=Fam234b PE=1 SV=1
old/young	-0.386	0.0836388	1.07759	210.52	0.58	3	7	inferred	Q69ZS6	Q69ZS6|SV2C_MOUSE Synaptic vesicle glycoprotein 2C OS=Mus musculus OX=10090 GN=Sv2c PE=1 SV=2
old/young	0.707	0.0884558	1.05327	222.64	0.581	3	1	inferred	Q0VGY8	Q0VGY8|TANC1_MOUSE Protein TANC1 OS=Mus musculus OX=10090 GN=Tanc1 PE=1 SV=2
old/young	-0.472	0.0729757	1.13682	183.68	0.581	3	7	inferred	P80313	P80313|TCPH_MOUSE T-complex protein 1 subunit eta OS=Mus musculus OX=10090 GN=Cct7 PE=1 SV=1
old/young	-0.767	0.0736421	1.13287	185.36	0.581	3	1	inferred	Q61503	Q61503|5NTD_MOUSE 5'-nucleotidase OS=Mus musculus OX=10090 GN=Nt5e PE=1 SV=2
old/young	-0.708	0.097951	1.00899	246.54	0.581	3	1	inferred	A0A0U1RNV7	A0A0U1RNV7|A0A0U1RNV7_MOUSE Lactadherin OS=Mus musculus OX=10090 GN=Mfge8 PE=4 SV=1
old/young	0.778	0.0733089	1.13484	184.52	0.582	3	1	inferred	Q9D6W8	Q9D6W8|BORC6_MOUSE BLOC-1-related complex subunit 6 OS=Mus musculus OX=10090 GN=Borcs6 PE=1 SV=1
old/young	0.352	0.0836388	1.07759	210.52	0.582	3	6	unresolved	P35279;P61294	P35279|RAB6A_MOUSE Ras-related protein Rab-6A OS=Mus musculus OX=10090 GN=Rab6a PE=1 SV=4
old/young	-0.586	0.0833056	1.07933	209.68	0.582	3	2	inferred	P39447	P39447|ZO1_MOUSE Tight junction protein ZO-1 OS=Mus musculus OX=10090 GN=Tjp1 PE=1 SV=2
old/young	0.448	0.0729757	1.13682	183.68	0.583	3	9	inferred	Q9R1P3	Q9R1P3|PSB2_MOUSE Proteasome subunit beta type-2 OS=Mus musculus OX=10090 GN=Psmb2 PE=1 SV=1
old/young	0.554	0.0836388	1.07759	210.52	0.583	3	3	inferred	Q69ZZ6	Q69ZZ6|TMCC1_MOUSE Transmembrane and coiled-coil domains protein 1 OS=Mus musculus OX=10090 GN=Tmcc1 PE=1 SV=2
old/young	0.719	0.0884558	1.05327	222.64	0.583	3	1	inferred	P02088	P02088|HBB1_MOUSE Hemoglobin subunit beta-1 OS=Mus musculus OX=10090 GN=Hbb-b1 PE=1 SV=2
old/young	0.547	0.0984508	1.00678	247.8	0.583	3	2	inferred	P62715	P62715|PP2AB_MOUSE Serine/threonine-protein phosphatase 2A catalytic subunit beta isoform OS=Mus musculus OX=10090 GN=Ppp2cb PE=1 SV=1
old/young	0.977	0.0989505	1.00458	249.06	0.583	2	1	inferred	Q9CXE7	Q9CXE7|TMED5_MOUSE Transmembrane emp24 domain-containing protein 5 OS=Mus musculus OX=10090 GN=Tmed5 PE=1 SV=1
old/young	-0.558	0.097951	1.00899	246.54	0.583	3	2	inferred	Q8BU30	Q8BU30|SYIC_MOUSE Isoleucine--tRNA ligase, cytoplasmic OS=Mus musculus OX=10090 GN=Iars PE=1 SV=2
old/young	0.519	0.0726425	1.13881	182.84	0.584	3	4	inferred	Q9QXT0	Q9QXT0|CNPY2_MOUSE Protein canopy homolog 2 OS=Mus musculus OX=10090 GN=Cnpy2 PE=1 SV=1
old/young	0.365	0.0884558	1.05327	222.64	0.584	3	5	inferred	O54984	O54984|ASNA_MOUSE ATPase Asna1 OS=Mus musculus OX=10090 GN=Asna1 PE=1 SV=2
old/young	0.586	0.0969515	1.01345	244.03	0.584	3	1	inferred	P58021	P58021|TM9S2_MOUSE Transmembrane 9 superfamily member 2 OS=Mus musculus OX=10090 GN=Tm9sf2 PE=1 SV=1
old/young	-0.454	0.0686438	1.1634	172.78	0.584	3	5	inferred	Q8VHM5	Q8VHM5|Q8VHM5_MOUSE Heterogeneous nuclear ribonucleoprotein R OS=Mus musculus OX=10090 GN=Hnrnpr PE=1 SV=1
old/young	-1.007	0.071976	1.14281	181.16	0.584	2	2	inferred	Q9JKF7	Q9JKF7|RM39_MOUSE 39S ribosomal protein L39, mitochondrial OS=Mus musculus OX=10090 GN=Mrpl39 PE=1 SV=4
old/young	-0.908	0.0833056	1.07933	209.68	0.584	2	1	inferred	P56983	P56983|TM14A_MOUSE Transmembrane protein 14A OS=Mus musculus OX=10090 GN=Tmem14a PE=3 SV=2
old/young	-0.295	0.0974513	1.01121	245.28	0.584	3	15	inferred	Q8BYI9	Q8BYI9|TENR_MOUSE Tenascin-R OS=Mus musculus OX=10090 GN=Tnr PE=1 SV=2
old/young	-0.395	0.097951	1.00899	246.54	0.584	3	5	inferred	P69566	P69566|RANB9_MOUSE Ran-binding protein 9 OS=Mus musculus OX=10090 GN=Ranbp9 PE=1 SV=1
old/young	0.806	0.0729757	1.13682	183.68	0.585	3	2	inferred	Q9CYN2	Q9CYN2|SPCS2_MOUSE Signal peptidase complex subunit 2 OS=Mus musculus OX=10090 GN=Spcs2 PE=1 SV=1
old/young	0.466	0.0769743	1.11365	193.74	0.585	3	3	inferred	Q61735	Q61735|CD47_MOUSE Leukocyte surface antigen CD47 OS=Mus musculus OX=10090 GN=Cd47 PE=1 SV=2
old/young	0.511	0.0969515	1.01345	244.03	0.585	3	2	unresolved	P62761;Q8BGZ1	P62761|VISL1_MOUSE Visinin-like protein 1 OS=Mus musculus OX=10090 GN=Vsnl1 PE=1 SV=2
old/young	0.583	0.0974513	1.01121	245.28	0.585	3	1	inferred	rev_G3XA17	G3XA17|G3XA17_MOUSE reversed Eukaryotic translation initiation factor 4 gamma 2 OS=Mus musculus OX=10090 GN=Eif4g2 PE=1 SV=1
old/young	0.539	0.0989505	1.00458	249.06	0.585	3	1	inferred	Q62186	Q62186|SSRD_MOUSE Translocon-associated protein subunit delta OS=Mus musculus OX=10090 GN=Ssr4 PE=1 SV=1
old/young	0.525	0.09995	1.00022	251.57	0.585	3	2	inferred	P61205	P61205|ARF3_MOUSE ADP-ribosylation factor 3 OS=Mus musculus OX=10090 GN=Arf3 PE=2 SV=2
old/young	0.421	0.0314241	1.50274	79.09	0.586	3	10	inferred	P70699	P70699|LYAG_MOUSE Lysosomal alpha-glucosidase OS=Mus musculus OX=10090 GN=Gaa PE=1 SV=2
old/young	1.14	0.0316614	1.49947	79.69	0.586	3	1	inferred	B1AYM9	B1AYM9|B1AYM9_MOUSE cDNA sequence CK137956 OS=Mus musculus OX=10090 GN=CK137956 PE=4 SV=1
old/young	0.555	0.0766411	1.11554	192.91	0.586	3	2	inferred	Q9DC69	Q9DC69|NDUA9_MOUSE NADH dehydrogenase [ubiquinone] 1 alpha subcomplex subunit 9, mitochondrial OS=Mus musculus OX=10090 GN=Ndufa9 PE=1 SV=2
old/young	0.394	0.0833056	1.07933	209.68	0.586	3	7	inferred	Q91VK4	Q91VK4|ITM2C_MOUSE Integral membrane protein 2C OS=Mus musculus OX=10090 GN=Itm2c PE=1 SV=2
old/young	0.553	0.0884558	1.05327	222.64	0.586	3	3	inferred	Q8CGK7	Q8CGK7|GNAL_MOUSE Guanine nucleotide-binding protein G(olf) subunit alpha OS=Mus musculus OX=10090 GN=Gnal PE=1 SV=1
old/young	0.639	0.097951	1.00899	246.54	0.586	3	1	inferred	Q62283	Q62283|TSN7_MOUSE Tetraspanin-7 OS=Mus musculus OX=10090 GN=Tspan7 PE=1 SV=2
old/young	0.626	0.09995	1.00022	251.57	0.586	3	1	inferred	Q62348	Q62348|TSN_MOUSE Translin OS=Mus musculus OX=10090 GN=Tsn PE=1 SV=1
old/young	-0.409	0.0686438	1.1634	172.78	0.586	3	5	inferred	Q8BG51	Q8BG51|MIRO1_MOUSE Mitochondrial Rho GTPase 1 OS=Mus musculus OX=10090 GN=Rhot1 PE=1 SV=1
old/young	-0.68	0.071976	1.14281	181.16	0.586	3	1	unresolved	Q6PIC6;Q8VDN2;Q9WV27	Q6PIC6|AT1A3_MOUSE Sodium/potassium-transporting ATPase subunit alpha-3 OS=Mus musculus OX=10090 GN=Atp1a3 PE=1 SV=1
old/young	-0.669	0.0726425	1.13881	182.84	0.586	3	2	inferred	P28028	P28028|BRAF_MOUSE Serine/threonine-protein kinase B-raf OS=Mus musculus OX=10090 GN=Braf PE=1 SV=3
old/young	-0.635	0.0883039	1.05402	222.26	0.586	3	2	unresolved	Q3UGX2;Q62261	Q3UGX2|Q3UGX2_MOUSE Spectrin beta chain OS=Mus musculus OX=10090 GN=Sptb PE=1 SV=1
old/young	0.824	0.0309948	1.50871	78.01	0.587	3	2	inferred	Q922U2	Q922U2|K2C5_MOUSE Keratin, type II cytoskeletal 5 OS=Mus musculus OX=10090 GN=Krt5 PE=1 SV=1
old/young	0.915	0.0676441	1.16977	170.26	0.587	2	1	inferred	Q9D125	Q9D125|RT25_MOUSE 28S ribosomal protein S25, mitochondrial OS=Mus musculus OX=10090 GN=Mrps25 PE=1 SV=1
old/young	0.602	0.0769743	1.11365	193.74	0.587	3	2	inferred	Q08460	Q08460|KCMA1_MOUSE Calcium-activated potassium channel subunit alpha-1 OS=Mus musculus OX=10090 GN=Kcnma1 PE=1 SV=2
old/young	0.487	0.0833056	1.07933	209.68	0.587	3	3	inferred	Q6I6G8	Q6I6G8|HECW2_MOUSE E3 ubiquitin-protein ligase HECW2 OS=Mus musculus OX=10090 GN=Hecw2 PE=1 SV=1
old/young	-0.514	0.0683106	1.16551	171.94	0.587	3	5	unresolved	P62137;P62141;P63087	P62137|PP1A_MOUSE Serine/threonine-protein phosphatase PP1-alpha catalytic subunit OS=Mus musculus OX=10090 GN=Ppp1ca PE=1 SV=1
old/young	-0.917	0.0816395	1.0881	205.49	0.587	2	1	unresolved	P17183;P21550	P17183|ENOG_MOUSE Gamma-enolase OS=Mus musculus OX=10090 GN=Eno2 PE=1 SV=2
old/young	-0.546	0.0829723	1.08107	208.84	0.587	3	2	inferred	Q91ZH7	Q91ZH7|ABHD3_MOUSE Phospholipase ABHD3 OS=Mus musculus OX=10090 GN=Abhd3 PE=1 SV=1
old/young	0.567	0.104948	0.979028	264.15	0.588	3	2	inferred	Q9ERY9	Q9ERY9|ERG28_MOUSE Probable ergosterol biosynthetic protein 28 OS=Mus musculus OX=10090 GN=Erg28 PE=2 SV=1
old/young	0.423	0.105447	0.976965	265.41	0.588	3	7	inferred	Q8C8N2	Q8C8N2|SCAI_MOUSE Protein SCAI OS=Mus musculus OX=10090 GN=Scai PE=1 SV=2
old/young	0.912	0.0313281	1.50407	78.85	0.588	3	1	inferred	Q8VED5	Q8VED5|K2C79_MOUSE Keratin, type II cytoskeletal 79 OS=Mus musculus OX=10090 GN=Krt79 PE=1 SV=2
old/young	2.195	0.0319947	1.49492	80.53	0.588	1	1	inferred	Q8BKC5	Q8BKC5|IPO5_MOUSE Importin-5 OS=Mus musculus OX=10090 GN=Ipo5 PE=1 SV=3
old/young	0.585	0.0673109	1.17191	169.42	0.588	3	2	inferred	O89023	O89023|TPP1_MOUSE Tripeptidyl-peptidase 1 OS=Mus musculus OX=10090 GN=Tpp1 PE=1 SV=2
old/young	0.489	0.0686438	1.1634	172.78	0.588	3	4	inferred	P0C192	P0C192|LRC4B_MOUSE Leucine-rich repeat-containing protein 4B OS=Mus musculus OX=10090 GN=Lrrc4b PE=1 SV=1
old/young	1.033	0.0696435	1.15712	175.29	0.588	2	1	inferred	P84075	P84075|HPCA_MOUSE Neuron-specific calcium-binding protein hippocalcin OS=Mus musculus OX=10090 GN=Hpca PE=1 SV=2
old/young	0.402	0.0726425	1.13881	182.84	0.588	3	9	inferred	Q61171	Q61171|PRDX2_MOUSE Peroxiredoxin-2 OS=Mus musculus OX=10090 GN=Prdx2 PE=1 SV=3
old/young	0.539	0.0819727	1.08633	206.33	0.588	3	2	inferred	Q9D6J5	Q9D6J5|NDUB8_MOUSE NADH dehydrogenase [ubiquinone] 1 beta subcomplex subunit 8, mitochondrial OS=Mus musculus OX=10090 GN=Ndufb8 PE=1 SV=1
old/young	0.415	0.0829723	1.08107	208.84	0.588	3	6	inferred	Q5DTL9	Q5DTL9|S4A10_MOUSE Sodium-driven chloride bicarbonate exchanger OS=Mus musculus OX=10090 GN=Slc4a10 PE=1 SV=2
old/young	0.465	0.09995	1.00022	251.57	0.588	3	3	inferred	Q8K021	Q8K021|SCAM1_MOUSE Secretory carrier-associated membrane protein 1 OS=Mus musculus OX=10090 GN=Scamp1 PE=1 SV=1
old/young	-0.39	0.071976	1.14281	181.16	0.588	3	8	inferred	Q6URW6-3	Q6URW6-3|MYH14_MOUSE Isoform 3 of Myosin-14 OS=Mus musculus OX=10090 GN=Myh14
old/young	-0.353	0.102449	0.989493	257.86	0.589	3	6	inferred	Q6P9K9	Q6P9K9|NRX3A_MOUSE Neurexin-3 OS=Mus musculus OX=10090 GN=Nrxn3 PE=1 SV=2
old/young	0.625	0.102949	0.98738	259.12	0.589	3	1	inferred	Q5XKN4	Q5XKN4|JAGN1_MOUSE Protein jagunal homolog 1 OS=Mus musculus OX=10090 GN=Jagn1 PE=1 SV=2
old/young	0.536	0.105947	0.974911	266.67	0.589	3	2	inferred	Q6P5F6	Q6P5F6|S39AA_MOUSE Zinc transporter ZIP10 OS=Mus musculus OX=10090 GN=Slc39a10 PE=1 SV=1
old/young	0.52	0.0676441	1.16977	170.26	0.589	3	3	inferred	P35278	P35278|RAB5C_MOUSE Ras-related protein Rab-5C OS=Mus musculus OX=10090 GN=Rab5c PE=1 SV=2
old/young	0.849	0.0683106	1.16551	171.94	0.589	2	1	inferred	Q7TNR6	Q7TNR6|IGS21_MOUSE Immunoglobulin superfamily member 21 OS=Mus musculus OX=10090 GN=Igsf21 PE=1 SV=1
old/young	0.84	0.0699767	1.15505	176.13	0.589	3	1	inferred	Q9JKZ2	Q9JKZ2|SC5A3_MOUSE Sodium/myo-inositol cotransporter OS=Mus musculus OX=10090 GN=Slc5a3 PE=1 SV=2
old/young	0.977	0.0776408	1.10991	195.42	0.589	2	1	inferred	A0A1W2P6Q6	A0A1W2P6Q6|A0A1W2P6Q6_MOUSE AP-3 complex subunit delta-1 (Fragment) OS=Mus musculus OX=10090 GN=Ap3d1 PE=1 SV=1
old/young	-0.423	0.0816395	1.0881	205.49	0.589	3	9	inferred	P11983	P11983|TCPA_MOUSE T-complex protein 1 subunit alpha OS=Mus musculus OX=10090 GN=Tcp1 PE=1 SV=3
old/young	0.604	0.102449	0.989493	257.86	0.59	3	1	inferred	Q3TYS2	Q3TYS2|CQ062_MOUSE Uncharacterized protein C17orf62 homolog OS=Mus musculus OX=10090 PE=1 SV=2
old/young	0.319	0.102949	0.98738	259.12	0.59	3	9	inferred	P49722	P49722|PSA2_MOUSE Proteasome subunit alpha type-2 OS=Mus musculus OX=10090 GN=Psma2 PE=1 SV=3
old/young	0.305	0.104948	0.979028	264.15	0.59	3	11	inferred	P97467	P97467|AMD_MOUSE Peptidyl-glycine alpha-amidating monooxygenase OS=Mus musculus OX=10090 GN=Pam PE=1 SV=2
old/young	0.408	0.105447	0.976965	265.41	0.59	3	4	inferred	Q9D8N0	Q9D8N0|EF1G_MOUSE Elongation factor 1-gamma OS=Mus musculus OX=10090 GN=Eef1g PE=1 SV=3
old/young	-0.43	0.105947	0.974911	266.67	0.59	3	3	inferred	Q64511	Q64511|TOP2B_MOUSE DNA topoisomerase 2-beta OS=Mus musculus OX=10090 GN=Top2b PE=1 SV=2
old/young	0.581	0.0323279	1.49042	81.37	0.59	3	4	unresolved	A8DUK4;P02088;P02089	A8DUK4|A8DUK4_MOUSE Beta-globin OS=Mus musculus OX=10090 GN=Hbb-bs PE=1 SV=1
old/young	0.486	0.0703099	1.15298	176.97	0.59	3	3	inferred	Q62425	Q62425|NDUA4_MOUSE Cytochrome c oxidase subunit NDUFA4 OS=Mus musculus OX=10090 GN=Ndufa4 PE=1 SV=2
old/young	0.364	0.071976	1.14281	181.16	0.59	3	8	inferred	O09061	O09061|PSB1_MOUSE Proteasome subunit beta type-1 OS=Mus musculus OX=10090 GN=Psmb1 PE=1 SV=1
old/young	0.569	0.0783072	1.1062	197.1	0.59	3	2	inferred	Q9QUP5	Q9QUP5|HPLN1_MOUSE Hyaluronan and proteoglycan link protein 1 OS=Mus musculus OX=10090 GN=Hapln1 PE=1 SV=1
old/young	0.744	0.10095	0.995896	254.09	0.59	2	1	inferred	rev_H3BKB7	H3BKB7|H3BKB7_MOUSE reversed POU domain protein OS=Mus musculus OX=10090 GN=Pou2f2 PE=1 SV=1
old/young	-0.928	0.0673109	1.17191	169.42	0.59	2	1	inferred	Q7TPH6	Q7TPH6|MYCB2_MOUSE E3 ubiquitin-protein ligase MYCBP2 OS=Mus musculus OX=10090 GN=Mycbp2 PE=1 SV=2
old/young	-0.395	0.0696435	1.15712	175.29	0.59	3	9	unresolved	P62814;Q91YH6	P62814|VATB2_MOUSE V-type proton ATPase subunit B, brain isoform OS=Mus musculus OX=10090 GN=Atp6v1b2 PE=1 SV=1
old/young	-0.731	0.0816395	1.0881	205.49	0.59	3	2	inferred	Q6QD59	Q6QD59|SEC20_MOUSE Vesicle transport protein SEC20 OS=Mus musculus OX=10090 GN=Bnip1 PE=1 SV=1
old/young	-0.413	0.0829723	1.08107	208.84	0.59	3	6	inferred	P31648	P31648|SC6A1_MOUSE Sodium- and chloride-dependent GABA transporter 1 OS=Mus musculus OX=10090 GN=Slc6a1 PE=1 SV=2
old/young	0.615	0.102449	0.989493	257.86	0.591	3	1	inferred	Q9CQV4	Q9CQV4|RETR3_MOUSE Reticulophagy regulator 3 OS=Mus musculus OX=10090 GN=Retreg3 PE=1 SV=1
old/young	0.436	0.103948	0.983184	261.64	0.591	3	3	inferred	Q9DC51	Q9DC51|GNAI3_MOUSE Guanine nucleotide-binding protein G(k) subunit alpha OS=Mus musculus OX=10090 GN=Gnai3 PE=1 SV=3
old/young	0.344	0.104448	0.981101	262.9	0.591	3	8	inferred	P99029	P99029|PRDX5_MOUSE Peroxiredoxin-5, mitochondrial OS=Mus musculus OX=10090 GN=Prdx5 PE=1 SV=2
old/young	0.596	0.104948	0.979028	264.15	0.591	3	2	inferred	Q9WVL6	Q9WVL6|EXTL3_MOUSE Exostosin-like 3 OS=Mus musculus OX=10090 GN=Extl3 PE=1 SV=2
old/young	1.117	0.0326612	1.48597	82.21	0.591	3	1	inferred	Q9JIT0	Q9JIT0|LMBR1_MOUSE Limb region 1 protein OS=Mus musculus OX=10090 GN=Lmbr1 PE=2 SV=1
old/young	0.416	0.0683106	1.16551	171.94	0.591	3	11	inferred	P09411	P09411|PGK1_MOUSE Phosphoglycerate kinase 1 OS=Mus musculus OX=10090 GN=Pgk1 PE=1 SV=4
old/young	0.485	0.0716428	1.14483	180.32	0.591	3	4	inferred	P61022	P61022|CHP1_MOUSE Calcineurin B homologous protein 1 OS=Mus musculus OX=10090 GN=Chp1 PE=1 SV=2
old/young	0.527	0.0796401	1.09887	200.45	0.591	3	2	inferred	P32883-2	P32883-2|RASK_MOUSE Isoform 2B of GTPase KRas OS=Mus musculus OX=10090 GN=Kras
old/young	0.404	0.0826391	1.08281	208	0.591	3	6	inferred	Q9CPR4	Q9CPR4|RL17_MOUSE 60S ribosomal protein L17 OS=Mus musculus OX=10090 GN=Rpl17 PE=1 SV=3
old/young	-1.169	0.0309948	1.50871	78.01	0.591	3	2	unresolved	P28656;Q78ZA7	P28656|NP1L1_MOUSE Nucleosome assembly protein 1-like 1 OS=Mus musculus OX=10090 GN=Nap1l1 PE=1 SV=2
old/young	-0.702	0.0356607	1.44781	89.76	0.591	3	3	inferred	P62317	P62317|SMD2_MOUSE Small nuclear ribonucleoprotein Sm D2 OS=Mus musculus OX=10090 GN=Snrpd2 PE=1 SV=1
old/young	-0.731	0.0803066	1.09525	202.13	0.591	3	1	unresolved	P05063;P05064	P05063|ALDOC_MOUSE Fructose-bisphosphate aldolase C OS=Mus musculus OX=10090 GN=Aldoc PE=1 SV=4
old/young	-0.399	0.080973	1.09166	203.81	0.591	3	7	inferred	P97449	P97449|AMPN_MOUSE Aminopeptidase N OS=Mus musculus OX=10090 GN=Anpep PE=1 SV=4
old/young	-0.545	0.0813062	1.08988	204.65	0.591	3	4	inferred	Q9EPK7	Q9EPK7|XPO7_MOUSE Exportin-7 OS=Mus musculus OX=10090 GN=Xpo7 PE=1 SV=3
old/young	0.317	0.103948	0.983184	261.64	0.592	3	14	inferred	Q91XV3	Q91XV3|BASP1_MOUSE Brain acid soluble protein 1 OS=Mus musculus OX=10090 GN=Basp1 PE=1 SV=3
old/young	0.403	0.104448	0.981101	262.9	0.592	3	6	inferred	P19157	P19157|GSTP1_MOUSE Glutathione S-transferase P 1 OS=Mus musculus OX=10090 GN=Gstp1 PE=1 SV=2
old/young	0.629	0.104948	0.979028	264.15	0.592	3	1	inferred	Q8BNY6	Q8BNY6|NCS1_MOUSE Neuronal calcium sensor 1 OS=Mus musculus OX=10090 GN=Ncs1 PE=1 SV=3
old/young	0.717	0.035994	1.44377	90.6	0.592	3	2	inferred	C0HK79	C0HK79|ARXS1_MOUSE Adipocyte-related X-chromosome expressed sequence 1 OS=Mus musculus OX=10090 GN=Arxes1 PE=1 SV=1
old/young	0.392	0.0673109	1.17191	169.42	0.592	3	7	inferred	P35700	P35700|PRDX1_MOUSE Peroxiredoxin-1 OS=Mus musculus OX=10090 GN=Prdx1 PE=1 SV=1
old/young	0.659	0.0713096	1.14685	179.49	0.592	3	4	inferred	P08228	P08228|SODC_MOUSE Superoxide dismutase [Cu-Zn] OS=Mus musculus OX=10090 GN=Sod1 PE=1 SV=2
old/young	0.431	0.071976	1.14281	181.16	0.592	3	4	inferred	P70296	P70296|PEBP1_MOUSE Phosphatidylethanolamine-binding protein 1 OS=Mus musculus OX=10090 GN=Pebp1 PE=1 SV=3
old/young	0.499	0.0783072	1.1062	197.1	0.592	3	2	inferred	Q91ZZ3	Q91ZZ3|SYUB_MOUSE Beta-synuclein OS=Mus musculus OX=10090 GN=Sncb PE=1 SV=1
old/young	0.78	0.0799733	1.09705	201.29	0.592	3	1	inferred	P54923	P54923|ADPRH_MOUSE [Protein ADP-ribosylarginine] hydrolase OS=Mus musculus OX=10090 GN=Adprh PE=1 SV=1
old/young	0.448	0.0806398	1.09345	202.97	0.592	3	3	inferred	Q60597	Q60597|ODO1_MOUSE 2-oxoglutarate dehydrogenase, mitochondrial OS=Mus musculus OX=10090 GN=Ogdh PE=1 SV=3
old/young	0.391	0.0816395	1.0881	205.49	0.592	3	7	inferred	Q60692	Q60692|PSB6_MOUSE Proteasome subunit beta type-6 OS=Mus musculus OX=10090 GN=Psmb6 PE=1 SV=3
old/young	0.68	0.0829723	1.08107	208.84	0.592	3	1	inferred	Q9CQN7	Q9CQN7|RM41_MOUSE 39S ribosomal protein L41, mitochondrial OS=Mus musculus OX=10090 GN=Mrpl41 PE=1 SV=1
old/young	-0.507	0.0336611	1.47287	84.72	0.592	3	12	inferred	E9PZP8	E9PZP8|E9PZP8_MOUSE HECT and RLD domain-containing E3 ubiquitin protein ligase family member 1 OS=Mus musculus OX=10090 GN=Herc1 PE=1 SV=1
old/young	-0.736	0.0669777	1.17407	168.58	0.592	3	1	inferred	Q9QZI9	Q9QZI9|SERC3_MOUSE Serine incorporator 3 OS=Mus musculus OX=10090 GN=Serinc3 PE=1 SV=2
old/young	-0.604	0.080973	1.09166	203.81	0.592	3	2	inferred	P83882	P83882|RL36A_MOUSE 60S ribosomal protein L36a OS=Mus musculus OX=10090 GN=Rpl36a PE=1 SV=2
old/young	0.481	0.102449	0.989493	257.86	0.593	3	2	inferred	Q9DB20	Q9DB20|ATPO_MOUSE ATP synthase subunit O, mitochondrial OS=Mus musculus OX=10090 GN=Atp5o PE=1 SV=1
old/young	-0.999	0.103948	0.983184	261.64	0.593	1	1	inferred	Q99JI6	Q99JI6|RAP1B_MOUSE Ras-related protein Rap-1b OS=Mus musculus OX=10090 GN=Rap1b PE=1 SV=2
old/young	0.605	0.0329945	1.48156	83.05	0.593	3	4	inferred	Q9D8B3	Q9D8B3|CHM4B_MOUSE Charged multivesicular body protein 4b OS=Mus musculus OX=10090 GN=Chmp4b PE=1 SV=2
old/young	0.498	0.0716428	1.14483	180.32	0.593	3	3	inferred	Q9CZX9	Q9CZX9|EMC4_MOUSE ER membrane protein complex subunit 4 OS=Mus musculus OX=10090 GN=Emc4 PE=1 SV=1
old/young	0.648	0.0796401	1.09887	200.45	0.593	3	1	inferred	Q149L6	Q149L6|DJB14_MOUSE DnaJ homolog subfamily B member 14 OS=Mus musculus OX=10090 GN=Dnajb14 PE=2 SV=1
old/young	0.51	0.101949	0.991617	256.61	0.593	3	2	inferred	Q68FH0	Q68FH0|PKP4_MOUSE Plakophilin-4 OS=Mus musculus OX=10090 GN=Pkp4 PE=1 SV=1
old/young	-1.231	0.0803066	1.09525	202.13	0.593	1	1	inferred	Q5FWH7	Q5FWH7|S39AC_MOUSE Zinc transporter ZIP12 OS=Mus musculus OX=10090 GN=Slc39a12 PE=1 SV=1
old/young	0.638	0.102449	0.989493	257.86	0.594	3	1	inferred	P12815	P12815|PDCD6_MOUSE Programmed cell death protein 6 OS=Mus musculus OX=10090 GN=Pdcd6 PE=1 SV=2
old/young	0.964	0.0334944	1.47503	84.31	0.594	2	2	inferred	Q91WD5	Q91WD5|NDUS2_MOUSE NADH dehydrogenase [ubiquinone] iron-sulfur protein 2, mitochondrial OS=Mus musculus OX=10090 GN=Ndufs2 PE=1 SV=1
old/young	0.666	0.0339943	1.46859	85.56	0.594	3	2	unresolved	P62746;Q9QUI0	P62746|RHOB_MOUSE Rho-related GTP-binding protein RhoB OS=Mus musculus OX=10090 GN=Rhob PE=1 SV=1
old/young	0.942	0.0356607	1.44781	89.76	0.594	3	1	inferred	Q9R0U0	Q9R0U0|SRS10_MOUSE Serine/arginine-rich splicing factor 10 OS=Mus musculus OX=10090 GN=Srsf10 PE=1 SV=2
old/young	0.836	0.0669777	1.17407	168.58	0.594	3	1	inferred	Q9CQ89	Q9CQ89|CUTA_MOUSE Protein CutA OS=Mus musculus OX=10090 GN=Cuta PE=1 SV=3
old/young	0.709	0.0709763	1.14889	178.65	0.594	3	1	inferred	Q8R4H9	Q8R4H9|ZNT5_MOUSE Zinc transporter 5 OS=Mus musculus OX=10090 GN=Slc30a5 PE=1 SV=1
old/young	0.356	0.0793069	1.10069	199.62	0.594	3	10	inferred	Q61885	Q61885|MOG_MOUSE Myelin-oligodendrocyte glycoprotein OS=Mus musculus OX=10090 GN=Mog PE=1 SV=1
old/young	0.427	0.101949	0.991617	256.61	0.594	3	3	inferred	P59481	P59481|LMA2L_MOUSE VIP36-like protein OS=Mus musculus OX=10090 GN=Lman2l PE=1 SV=1
old/young	-0.736	0.0391922	1.4068	98.65	0.594	3	3	unresolved	P68369;P68373;Q9JJZ2	P68369|TBA1A_MOUSE Tubulin alpha-1A chain OS=Mus musculus OX=10090 GN=Tuba1a PE=1 SV=1
old/young	-1.391	0.0713096	1.14685	179.49	0.594	1	1	inferred	P49443	P49443|PPM1A_MOUSE Protein phosphatase 1A OS=Mus musculus OX=10090 GN=Ppm1a PE=1 SV=1
old/young	1.032	0.0333278	1.47719	83.89	0.595	2	2	inferred	E9Q3C1	E9Q3C1|C2CD2_MOUSE C2 domain-containing protein 2 OS=Mus musculus OX=10090 GN=C2cd2 PE=1 SV=1
old/young	0.799	0.040192	1.39586	101.16	0.595	3	1	inferred	Q6P6J9	Q6P6J9|TXD15_MOUSE Thioredoxin domain-containing protein 15 OS=Mus musculus OX=10090 GN=Txndc15 PE=1 SV=1
old/young	0.321	0.0796401	1.09887	200.45	0.595	3	15	inferred	P43406	P43406|ITAV_MOUSE Integrin alpha-V OS=Mus musculus OX=10090 GN=Itgav PE=1 SV=2
old/young	-0.385	0.065978	1.1806	166.07	0.595	3	9	inferred	P97427	P97427|DPYL1_MOUSE Dihydropyrimidinase-related protein 1 OS=Mus musculus OX=10090 GN=Crmp1 PE=1 SV=1
old/young	1.803	0.0354941	1.44984	89.34	0.596	1	1	inferred	Q922L6	Q922L6|NELFD_MOUSE Negative elongation factor D OS=Mus musculus OX=10090 GN=Nelfcd PE=1 SV=2
old/young	0.952	0.039992	1.39803	100.66	0.596	3	1	inferred	Q8CDI7	Q8CDI7|CC150_MOUSE Coiled-coil domain-containing protein 150 OS=Mus musculus OX=10090 GN=Ccdc150 PE=2 SV=2
old/young	0.801	0.0613129	1.21245	154.32	0.596	3	1	inferred	Q80XL7	Q80XL7|MPPE1_MOUSE Metallophosphoesterase 1 OS=Mus musculus OX=10090 GN=Mppe1 PE=2 SV=1
old/young	0.647	0.0646451	1.18946	162.71	0.596	3	2	inferred	Q62433	Q62433|NDRG1_MOUSE Protein NDRG1 OS=Mus musculus OX=10090 GN=Ndrg1 PE=1 SV=1
old/young	0.621	0.0653116	1.18501	164.39	0.596	3	2	inferred	Q78IK2	Q78IK2|USMG5_MOUSE Up-regulated during skeletal muscle growth protein 5 OS=Mus musculus OX=10090 GN=Usmg5 PE=1 SV=1
old/young	0.469	0.0663112	1.17841	166.91	0.596	3	5	inferred	P10649	P10649|GSTM1_MOUSE Glutathione S-transferase Mu 1 OS=Mus musculus OX=10090 GN=Gstm1 PE=1 SV=2
old/young	0.526	0.0793069	1.10069	199.62	0.596	3	3	unresolved	Q9D6M3;Q9DB41	Q9D6M3|GHC1_MOUSE Mitochondrial glutamate carrier 1 OS=Mus musculus OX=10090 GN=Slc25a22 PE=1 SV=1
old/young	-0.335	0.0656448	1.1828	165.23	0.596	3	59	inferred	A3KGU9	A3KGU9|A3KGU9_MOUSE Spectrin alpha chain, non-erythrocytic 1 OS=Mus musculus OX=10090 GN=Sptan1 PE=1 SV=2
old/young	-0.727	0.0669777	1.17407	168.58	0.596	3	1	inferred	P21661	P21661|NEC2_MOUSE Neuroendocrine convertase 2 OS=Mus musculus OX=10090 GN=Pcsk2 PE=1 SV=1
old/young	0.636	0.0616461	1.21009	155.16	0.597	3	2	inferred	Q8CIP5	Q8CIP5|DISP2_MOUSE Protein dispatched homolog 2 OS=Mus musculus OX=10090 GN=Disp2 PE=1 SV=1
old/young	0.75	0.0649783	1.18723	163.55	0.597	3	1	inferred	P03930	P03930|ATP8_MOUSE ATP synthase protein 8 OS=Mus musculus OX=10090 GN=Mtatp8 PE=1 SV=1
old/young	1.636	0.065978	1.1806	166.07	0.597	1	1	inferred	Q9Z1F9	Q9Z1F9|SAE2_MOUSE SUMO-activating enzyme subunit 2 OS=Mus musculus OX=10090 GN=Uba2 PE=1 SV=1
old/young	0.74	0.0666445	1.17624	167.74	0.597	3	1	inferred	Q9CQS8	Q9CQS8|SC61B_MOUSE Protein transport protein Sec61 subunit beta OS=Mus musculus OX=10090 GN=Sec61b PE=1 SV=3
old/young	0.337	0.107946	0.966793	271.7	0.598	3	8	inferred	P17710	P17710|HXK1_MOUSE Hexokinase-1 OS=Mus musculus OX=10090 GN=Hk1 PE=1 SV=3
old/young	0.451	0.109445	0.960803	275.47	0.598	3	2	inferred	Q62442	Q62442|VAMP1_MOUSE Vesicle-associated membrane protein 1 OS=Mus musculus OX=10090 GN=Vamp1 PE=1 SV=1
old/young	0.441	0.110445	0.956855	277.99	0.598	3	3	inferred	P49070	P49070|CAMLG_MOUSE Calcium signal-modulating cyclophilin ligand OS=Mus musculus OX=10090 GN=Camlg PE=1 SV=2
old/young	0.775	0.0653116	1.18501	164.39	0.598	3	1	inferred	Q9DCU2	Q9DCU2|PLLP_MOUSE Plasmolipin OS=Mus musculus OX=10090 GN=Pllp PE=1 SV=1
old/young	-0.981	0.0391922	1.4068	98.65	0.598	3	1	inferred	P62881	P62881|GNB5_MOUSE Guanine nucleotide-binding protein subunit beta-5 OS=Mus musculus OX=10090 GN=Gnb5 PE=1 SV=1
old/young	-0.694	0.0613129	1.21245	154.32	0.598	3	1	unresolved	A2AQ07;Q922F4;Q9ERD7	A2AQ07|TBB1_MOUSE Tubulin beta-1 chain OS=Mus musculus OX=10090 GN=Tubb1 PE=1 SV=1
old/young	-0.913	0.0619793	1.20775	156	0.598	3	1	inferred	Q4KMM3	Q4KMM3|OXR1_MOUSE Oxidation resistance protein 1 OS=Mus musculus OX=10090 GN=Oxr1 PE=1 SV=3
old/young	-0.583	0.0646451	1.18946	162.71	0.598	3	4	inferred	Q07113	Q07113|MPRI_MOUSE Cation-independent mannose-6-phosphate receptor OS=Mus musculus OX=10090 GN=Igf2r PE=1 SV=1
old/young	-0.499	0.0669777	1.17407	168.58	0.598	3	5	inferred	Q80XN0	Q80XN0|BDH_MOUSE D-beta-hydroxybutyrate dehydrogenase, mitochondrial OS=Mus musculus OX=10090 GN=Bdh1 PE=1 SV=2
old/young	0.298	0.108446	0.964787	272.96	0.599	3	12	inferred	P51150	P51150|RAB7A_MOUSE Ras-related protein Rab-7a OS=Mus musculus OX=10090 GN=Rab7a PE=1 SV=2
old/young	0.638	0.108946	0.962791	274.22	0.599	3	2	inferred	P10107	P10107|ANXA1_MOUSE Annexin A1 OS=Mus musculus OX=10090 GN=Anxa1 PE=1 SV=2
old/young	-0.305	0.109445	0.960803	275.47	0.599	3	15	inferred	P43006	P43006|EAA2_MOUSE Excitatory amino acid transporter 2 OS=Mus musculus OX=10090 GN=Slc1a2 PE=1 SV=1
old/young	0.527	0.109945	0.958824	276.73	0.599	3	1	inferred	Q9Z239	Q9Z239|PLM_MOUSE Phospholemman OS=Mus musculus OX=10090 GN=Fxyd1 PE=1 SV=1
old/young	-0.528	0.110445	0.956855	277.99	0.599	3	2	inferred	Q9Z1Q9	Q9Z1Q9|SYVC_MOUSE Valine--tRNA ligase OS=Mus musculus OX=10090 GN=Vars PE=1 SV=1
old/young	0.557	0.110945	0.954894	279.25	0.599	3	1	inferred	E9Q0B5	E9Q0B5|E9Q0B5_MOUSE Fc fragment of IgG-binding protein OS=Mus musculus OX=10090 GN=Fcgbp PE=1 SV=1
old/young	0.626	0.039992	1.39803	100.66	0.599	3	3	inferred	O35425	O35425|BOK_MOUSE Bcl-2-related ovarian killer protein OS=Mus musculus OX=10090 GN=Bok PE=1 SV=1
old/young	0.55	0.0592352	1.22742	149.09	0.599	3	2	inferred	Q61411	Q61411|RASH_MOUSE GTPase HRas OS=Mus musculus OX=10090 GN=Hras PE=1 SV=2
old/young	0.895	0.0607348	1.21656	152.87	0.599	2	2	inferred	P98156	P98156|VLDLR_MOUSE Very low-density lipoprotein receptor OS=Mus musculus OX=10090 GN=Vldlr PE=1 SV=1
old/young	0.33	0.108446	0.964787	272.96	0.6	3	11	inferred	P80560	P80560|PTPR2_MOUSE Receptor-type tyrosine-protein phosphatase N2 OS=Mus musculus OX=10090 GN=Ptprn2 PE=1 SV=2
old/young	-0.3	0.108946	0.962791	274.22	0.6	3	10	inferred	P68368	P68368|TBA4A_MOUSE Tubulin alpha-4A chain OS=Mus musculus OX=10090 GN=Tuba4a PE=1 SV=1
old/young	0.366	0.109445	0.960803	275.47	0.6	3	6	inferred	Q61137	Q61137|ASTN1_MOUSE Astrotactin-1 OS=Mus musculus OX=10090 GN=Astn1 PE=1 SV=4
old/young	-0.261	0.110445	0.956855	277.99	0.6	3	28	inferred	P09103	P09103|PDIA1_MOUSE Protein disulfide-isomerase OS=Mus musculus OX=10090 GN=P4hb PE=1 SV=2
old/young	0.466	0.0354941	1.44984	89.34	0.6	3	13	inferred	P05201	P05201|AATC_MOUSE Aspartate aminotransferase, cytoplasmic OS=Mus musculus OX=10090 GN=Got1 PE=1 SV=3
old/young	0.605	0.039792	1.4002	100.16	0.6	3	2	inferred	Q9DCT2	Q9DCT2|NDUS3_MOUSE NADH dehydrogenase [ubiquinone] iron-sulfur protein 3, mitochondrial OS=Mus musculus OX=10090 GN=Ndufs3 PE=1 SV=2
old/young	0.77	0.0524869	1.27995	132.11	0.6	3	1	inferred	Q9D7M1	Q9D7M1|GID8_MOUSE Glucose-induced degradation protein 8 homolog OS=Mus musculus OX=10090 GN=Gid8 PE=1 SV=1
old/young	0.572	0.0603132	1.21959	151.81	0.6	3	2	inferred	O55242	O55242|SGMR1_MOUSE Sigma non-opioid intracellular receptor 1 OS=Mus musculus OX=10090 GN=Sigmar1 PE=1 SV=1
old/young	0.443	0.0609797	1.21481	153.49	0.6	3	5	inferred	Q9CZM2	Q9CZM2|RL15_MOUSE 60S ribosomal protein L15 OS=Mus musculus OX=10090 GN=Rpl15 PE=2 SV=4
old/young	0.445	0.0612347	1.213	154.13	0.6	3	5	inferred	P63321	P63321|RALA_MOUSE Ras-related protein Ral-A OS=Mus musculus OX=10090 GN=Rala PE=1 SV=1
old/young	0.494	0.0624844	1.20423	157.27	0.6	3	4	inferred	P62484	P62484|ABI2_MOUSE Abl interactor 2 OS=Mus musculus OX=10090 GN=Abi2 PE=1 SV=1
old/young	0.742	0.0643119	1.19171	161.87	0.6	3	1	inferred	P17439	P17439|GLCM_MOUSE Glucosylceramidase OS=Mus musculus OX=10090 GN=Gba PE=1 SV=1
old/young	0.492	0.0646451	1.18946	162.71	0.6	3	5	inferred	Q9CQ92	Q9CQ92|FIS1_MOUSE Mitochondrial fission 1 protein OS=Mus musculus OX=10090 GN=Fis1 PE=1 SV=1
old/young	-0.54	0.0574856	1.24044	144.69	0.6	3	3	inferred	Q7TMM9	Q7TMM9|TBB2A_MOUSE Tubulin beta-2A chain OS=Mus musculus OX=10090 GN=Tubb2a PE=1 SV=1
old/young	0.487	0.112944	0.947139	284.28	0.601	3	2	unresolved	Q8BFZ9;Q91X78	Q8BFZ9|ERLN2_MOUSE Erlin-2 OS=Mus musculus OX=10090 GN=Erlin2 PE=1 SV=1
old/young	0.639	0.113943	0.943312	286.79	0.601	3	1	inferred	Q3U4G3	Q3U4G3|XXLT1_MOUSE Xyloside xylosyltransferase 1 OS=Mus musculus OX=10090 GN=Xxylt1 PE=1 SV=2
old/young	0.629	0.114443	0.941412	288.05	0.601	3	2	inferred	Q9D289	Q9D289|TPC6B_MOUSE Trafficking protein particle complex subunit 6B OS=Mus musculus OX=10090 GN=Trappc6b PE=1 SV=1
old/young	0.45	0.0353274	1.45189	88.92	0.601	3	9	inferred	P05202	P05202|AATM_MOUSE Aspartate aminotransferase, mitochondrial OS=Mus musculus OX=10090 GN=Got2 PE=1 SV=1
old/young	0.566	0.0606465	1.21719	152.65	0.601	3	2	inferred	Q9JIK9	Q9JIK9|RT34_MOUSE 28S ribosomal protein S34, mitochondrial OS=Mus musculus OX=10090 GN=Mrps34 PE=1 SV=1
old/young	-1.27	0.0369926	1.43189	93.11	0.601	2	1	inferred	Q5Y5T2	Q5Y5T2|ZDH18_MOUSE Palmitoyltransferase ZDHHC18 OS=Mus musculus OX=10090 GN=Zdhhc18 PE=1 SV=4
old/young	-0.707	0.0379924	1.4203	95.63	0.601	3	2	inferred	Q9CW03	Q9CW03|SMC3_MOUSE Structural maintenance of chromosomes protein 3 OS=Mus musculus OX=10090 GN=Smc3 PE=1 SV=2
old/young	-0.549	0.0417916	1.37891	105.19	0.601	3	3	unresolved	Q7TMK9;Q8VHM5	Q7TMK9|HNRPQ_MOUSE Heterogeneous nuclear ribonucleoprotein Q OS=Mus musculus OX=10090 GN=Syncrip PE=1 SV=2
old/young	-0.588	0.0592352	1.22742	149.09	0.601	3	4	inferred	Q61553	Q61553|FSCN1_MOUSE Fascin OS=Mus musculus OX=10090 GN=Fscn1 PE=1 SV=4
old/young	-0.31	0.0639787	1.19396	161.03	0.601	3	20	inferred	Q9D8E6	Q9D8E6|RL4_MOUSE 60S ribosomal protein L4 OS=Mus musculus OX=10090 GN=Rpl4 PE=1 SV=3
old/young	0.577	0.112444	0.949065	283.02	0.602	3	1	inferred	Q80XI3	Q80XI3|IF4G3_MOUSE Eukaryotic translation initiation factor 4 gamma 3 OS=Mus musculus OX=10090 GN=Eif4g3 PE=1 SV=2
old/young	0.473	0.112944	0.947139	284.28	0.602	3	2	unresolved	P35278;P61021;Q9CQD1	P35278|RAB5C_MOUSE Ras-related protein Rab-5C OS=Mus musculus OX=10090 GN=Rab5c PE=1 SV=2
old/young	-0.361	0.113443	0.945221	285.54	0.602	3	10	unresolved	Q5SQX6;Q7TMB8	Q5SQX6|CYFP2_MOUSE Cytoplasmic FMR1-interacting protein 2 OS=Mus musculus OX=10090 GN=Cyfip2 PE=1 SV=2
old/young	0.376	0.0391922	1.4068	98.65	0.602	3	12	inferred	P46638	P46638|RB11B_MOUSE Ras-related protein Rab-11B OS=Mus musculus OX=10090 GN=Rab11b PE=1 SV=3
old/young	0.518	0.0413917	1.38309	104.18	0.602	3	5	inferred	Q61334	Q61334|BAP29_MOUSE B-cell receptor-associated protein 29 OS=Mus musculus OX=10090 GN=Bcap29 PE=1 SV=1
old/young	0.539	0.0415917	1.38099	104.69	0.602	3	4	inferred	P48774	P48774|GSTM5_MOUSE Glutathione S-transferase Mu 5 OS=Mus musculus OX=10090 GN=Gstm5 PE=1 SV=1
old/young	0.934	0.0636455	1.19623	160.2	0.602	1	2	inferred	O88844	O88844|IDHC_MOUSE Isocitrate dehydrogenase [NADP] cytoplasmic OS=Mus musculus OX=10090 GN=Idh1 PE=1 SV=2
old/young	0.73	0.0643119	1.19171	161.87	0.602	3	2	inferred	Q99KJ8	Q99KJ8|DCTN2_MOUSE Dynactin subunit 2 OS=Mus musculus OX=10090 GN=Dctn2 PE=1 SV=3
old/young	-0.312	0.0368272	1.43383	92.69	0.602	3	80	inferred	E9Q401	E9Q401|RYR2_MOUSE Ryanodine receptor 2 OS=Mus musculus OX=10090 GN=Ryr2 PE=1 SV=1
old/young	-0.67	0.0389922	1.40902	98.14	0.602	3	2	unresolved	P62874;P62880	P62874|GBB1_MOUSE Guanine nucleotide-binding protein G(I)/G(S)/G(T) subunit beta-1 OS=Mus musculus OX=10090 GN=Gnb1 PE=1 SV=3
old/young	-0.456	0.0603132	1.21959	151.81	0.602	3	6	inferred	O70161	O70161|PI51C_MOUSE Phosphatidylinositol 4-phosphate 5-kinase type-1 gamma OS=Mus musculus OX=10090 GN=Pip5k1c PE=1 SV=2
old/young	0.297	0.111944	0.950999	281.76	0.603	3	15	inferred	P60879	P60879|SNP25_MOUSE Synaptosomal-associated protein 25 OS=Mus musculus OX=10090 GN=Snap25 PE=1 SV=1
old/young	0.638	0.112444	0.949065	283.02	0.603	3	1	inferred	Q9DB43	Q9DB43|ZFPL1_MOUSE Zinc finger protein-like 1 OS=Mus musculus OX=10090 GN=Zfpl1 PE=1 SV=1
old/young	-0.737	0.113943	0.943312	286.79	0.603	2	1	unresolved	Q8C1B7;Q8CHH9	Q8C1B7|SEP11_MOUSE Septin-11 OS=Mus musculus OX=10090 GN=Sept11 PE=1 SV=4
old/young	0.521	0.114443	0.941412	288.05	0.603	3	2	inferred	Q80TE7	Q80TE7|LRRC7_MOUSE Leucine-rich repeat-containing protein 7 OS=Mus musculus OX=10090 GN=Lrrc7 PE=1 SV=2
old/young	0.392	0.114943	0.939519	289.31	0.603	3	5	unresolved	P62821;Q9D1G1	P62821|RAB1A_MOUSE Ras-related protein Rab-1A OS=Mus musculus OX=10090 GN=Rab1A PE=1 SV=3
old/young	-0.556	0.115442	0.937635	290.57	0.603	3	1	inferred	A0A1Y7VJP1	A0A1Y7VJP1|A0A1Y7VJP1_MOUSE Ryanodine receptor 2 (Fragment) OS=Mus musculus OX=10090 GN=Ryr2 PE=1 SV=1
old/young	0.874	0.037827	1.4222	95.21	0.603	3	1	inferred	Q7M729	Q7M729|SCN4B_MOUSE Sodium channel subunit beta-4 OS=Mus musculus OX=10090 GN=Scn4b PE=1 SV=1
old/young	0.903	0.0385923	1.4135	97.14	0.603	3	1	inferred	Q9Z210	Q9Z210|PX11B_MOUSE Peroxisomal membrane protein 11B OS=Mus musculus OX=10090 GN=Pex11b PE=1 SV=1
old/young	0.502	0.0387922	1.41126	97.64	0.603	3	4	inferred	Q99KF1	Q99KF1|TMED9_MOUSE Transmembrane emp24 domain-containing protein 9 OS=Mus musculus OX=10090 GN=Tmed9 PE=1 SV=2
old/young	0.612	0.0421916	1.37477	106.2	0.603	3	4	inferred	Q9CR68	Q9CR68|UCRI_MOUSE Cytochrome b-c1 complex subunit Rieske, mitochondrial OS=Mus musculus OX=10090 GN=Uqcrfs1 PE=1 SV=1
old/young	0.553	0.0524869	1.27995	132.11	0.603	3	5	inferred	P61294	P61294|RAB6B_MOUSE Ras-related protein Rab-6B OS=Mus musculus OX=10090 GN=Rab6b PE=1 SV=1
old/young	0.696	0.0574856	1.24044	144.69	0.603	3	2	inferred	Q3UGY8	Q3UGY8|BIG3_MOUSE Brefeldin A-inhibited guanine nucleotide-exchange protein 3 OS=Mus musculus OX=10090 GN=Arfgef3 PE=1 SV=1
old/young	0.687	0.0584854	1.23295	147.21	0.603	3	2	inferred	P70245	P70245|EBP_MOUSE 3-beta-hydroxysteroid-Delta(8),Delta(7)-isomerase OS=Mus musculus OX=10090 GN=Ebp PE=1 SV=3
old/young	0.711	0.0587353	1.2311	147.84	0.603	3	2	inferred	Q80ZS3	Q80ZS3|RT26_MOUSE 28S ribosomal protein S26, mitochondrial OS=Mus musculus OX=10090 GN=Mrps26 PE=1 SV=1
old/young	0.42	0.0639787	1.19396	161.03	0.603	3	5	inferred	Q8C0L0	Q8C0L0|TMX4_MOUSE Thioredoxin-related transmembrane protein 4 OS=Mus musculus OX=10090 GN=Tmx4 PE=1 SV=2
old/young	0.602	0.112944	0.947139	284.28	0.604	3	1	unresolved	B0F2B4;Q69ZK9;Q8BYM5	B0F2B4|NLGN4_MOUSE Neuroligin 4-like OS=Mus musculus OX=10090 GN=Nlgn4l PE=1 SV=1
old/young	0.728	0.113943	0.943312	286.79	0.604	3	1	inferred	Q9DCJ5	Q9DCJ5|NDUA8_MOUSE NADH dehydrogenase [ubiquinone] 1 alpha subcomplex subunit 8 OS=Mus musculus OX=10090 GN=Ndufa8 PE=1 SV=3
old/young	0.57	0.115442	0.937635	290.57	0.604	3	1	inferred	Q9CQ10	Q9CQ10|CHMP3_MOUSE Charged multivesicular body protein 3 OS=Mus musculus OX=10090 GN=Chmp3 PE=1 SV=3
old/young	0.614	0.115942	0.935759	291.83	0.604	3	1	inferred	Q8K4Z3	Q8K4Z3|NNRE_MOUSE NAD(P)H-hydrate epimerase OS=Mus musculus OX=10090 GN=Naxe PE=1 SV=1
old/young	0.396	0.0589853	1.22926	148.47	0.604	3	10	inferred	P62761	P62761|VISL1_MOUSE Visinin-like protein 1 OS=Mus musculus OX=10090 GN=Vsnl1 PE=1 SV=2
old/young	0.478	0.0592352	1.22742	149.09	0.604	3	4	inferred	Q9DAS9	Q9DAS9|GBG12_MOUSE Guanine nucleotide-binding protein G(I)/G(S)/G(O) subunit gamma-12 OS=Mus musculus OX=10090 GN=Gng12 PE=1 SV=3
old/young	-0.702	0.0633122	1.19851	159.36	0.604	3	1	unresolved	P68368;P68369;P68373;Q3UX10	P68368|TBA4A_MOUSE Tubulin alpha-4A chain OS=Mus musculus OX=10090 GN=Tuba4a PE=1 SV=1
old/young	-0.55	0.112444	0.949065	283.02	0.605	3	1	inferred	Q91Y44	Q91Y44|BRDT_MOUSE Bromodomain testis-specific protein OS=Mus musculus OX=10090 GN=Brdt PE=1 SV=3
old/young	0.426	0.0353274	1.45189	88.92	0.605	3	19	inferred	Q9D7N9	Q9D7N9|APMAP_MOUSE Adipocyte plasma membrane-associated protein OS=Mus musculus OX=10090 GN=Apmap PE=1 SV=1
old/young	0.502	0.0427914	1.36864	107.71	0.605	3	9	inferred	P62751	P62751|RL23A_MOUSE 60S ribosomal protein L23a OS=Mus musculus OX=10090 GN=Rpl23a PE=1 SV=1
old/young	0.56	0.0429914	1.36662	108.21	0.605	3	4	inferred	P60766	P60766|CDC42_MOUSE Cell division control protein 42 homolog OS=Mus musculus OX=10090 GN=Cdc42 PE=1 SV=2
old/young	0.868	0.0554861	1.25582	139.66	0.605	3	1	inferred	P63034	P63034|CYH2_MOUSE Cytohesin-2 OS=Mus musculus OX=10090 GN=Cyth2 PE=1 SV=2
old/young	0.926	0.0572357	1.24233	144.06	0.605	2	1	inferred	Q9EPK2	Q9EPK2|XRP2_MOUSE Protein XRP2 OS=Mus musculus OX=10090 GN=Rp2 PE=1 SV=3
old/young	0.564	0.0632342	1.19905	159.16	0.605	3	3	inferred	Q99P72	Q99P72|RTN4_MOUSE Reticulon-4 OS=Mus musculus OX=10090 GN=Rtn4 PE=1 SV=2
old/young	0.906	0.0636455	1.19623	160.2	0.605	2	1	inferred	Q3TTY5	Q3TTY5|K22E_MOUSE Keratin, type II cytoskeletal 2 epidermal OS=Mus musculus OX=10090 GN=Krt2 PE=1 SV=1
old/young	-0.367	0.0574856	1.24044	144.69	0.605	3	23	inferred	Q8K0U4	Q8K0U4|HS12A_MOUSE Heat shock 70 kDa protein 12A OS=Mus musculus OX=10090 GN=Hspa12a PE=1 SV=1
old/young	-0.424	0.0603132	1.21959	151.81	0.605	3	7	unresolved	P47757;P47757-4	P47757|CAPZB_MOUSE F-actin-capping protein subunit beta OS=Mus musculus OX=10090 GN=Capzb PE=1 SV=3
old/young	0.452	0.117441	0.930179	295.6	0.606	3	2	inferred	Q9QXV0	Q9QXV0|PCSK1_MOUSE ProSAAS OS=Mus musculus OX=10090 GN=Pcsk1n PE=1 SV=2
old/young	0.597	0.0377924	1.4226	95.12	0.606	3	3	inferred	Q9CQW1	Q9CQW1|YKT6_MOUSE Synaptobrevin homolog YKT6 OS=Mus musculus OX=10090 GN=Ykt6 PE=1 SV=1
old/young	0.772	0.0411918	1.38519	103.68	0.606	3	2	inferred	Q9Z2I2	Q9Z2I2|FKB1B_MOUSE Peptidyl-prolyl cis-trans isomerase FKBP1B OS=Mus musculus OX=10090 GN=Fkbp1b PE=1 SV=3
old/young	0.74	0.0425915	1.37068	107.2	0.606	3	2	inferred	E9PUL5	E9PUL5|PRRT2_MOUSE Proline-rich transmembrane protein 2 OS=Mus musculus OX=10090 GN=Prrt2 PE=1 SV=1
old/young	0.745	0.0524869	1.27995	132.11	0.606	3	2	inferred	Q8R0S4	Q8R0S4|CACB4_MOUSE Voltage-dependent L-type calcium channel subunit beta-4 OS=Mus musculus OX=10090 GN=Cacnb4 PE=1 SV=2
old/young	0.815	0.0532367	1.27379	134	0.606	3	1	unresolved	Q8VED5;Q922U2	Q8VED5|K2C79_MOUSE Keratin, type II cytoskeletal 79 OS=Mus musculus OX=10090 GN=Krt79 PE=1 SV=2
old/young	0.855	0.0582354	1.23481	146.58	0.606	3	1	inferred	P70202	P70202|LXN_MOUSE Latexin OS=Mus musculus OX=10090 GN=Lxn PE=1 SV=2
old/young	-0.789	0.0351608	1.45394	88.5	0.606	3	2	inferred	P09470	P09470|ACE_MOUSE Angiotensin-converting enzyme OS=Mus musculus OX=10090 GN=Ace PE=1 SV=3
old/young	-0.803	0.0413917	1.38309	104.18	0.606	3	1	unresolved	P99024;Q7TMM9;Q9CWF2;Q9ERD7	P99024|TBB5_MOUSE Tubulin beta-5 chain OS=Mus musculus OX=10090 GN=Tubb5 PE=1 SV=1
old/young	-0.767	0.0584854	1.23295	147.21	0.606	3	1	inferred	P21550	P21550|ENOB_MOUSE Beta-enolase OS=Mus musculus OX=10090 GN=Eno3 PE=1 SV=3
old/young	0.338	0.116942	0.932031	294.34	0.607	3	11	inferred	P17751	P17751|TPIS_MOUSE Triosephosphate isomerase OS=Mus musculus OX=10090 GN=Tpi1 PE=1 SV=4
old/young	0.403	0.117441	0.930179	295.6	0.607	3	4	inferred	P62897	P62897|CYC_MOUSE Cytochrome c, somatic OS=Mus musculus OX=10090 GN=Cycs PE=1 SV=2
old/young	0.608	0.117941	0.928335	296.86	0.607	3	1	inferred	A2A9V9	A2A9V9|A2A9V9_MOUSE BTB/POZ domain-containing protein KCTD2 OS=Mus musculus OX=10090 GN=Kctd2 PE=1 SV=1
old/young	0.455	0.0554861	1.25582	139.66	0.607	3	6	inferred	P60904	P60904|DNJC5_MOUSE DnaJ homolog subfamily C member 5 OS=Mus musculus OX=10090 GN=Dnajc5 PE=1 SV=1
old/young	0.812	0.0603132	1.21959	151.81	0.607	3	1	inferred	G3XA25	G3XA25|G3XA25_MOUSE Acetyl-CoA acetyltransferase, cytosolic OS=Mus musculus OX=10090 GN=Acat2 PE=1 SV=1
old/young	-0.658	0.0349942	1.456	88.08	0.607	3	2	unresolved	P46096;Q9R0N5	P46096|SYT1_MOUSE Synaptotagmin-1 OS=Mus musculus OX=10090 GN=Syt1 PE=1 SV=1
old/young	-0.389	0.0375925	1.4249	94.62	0.607	3	15	unresolved	A0A1Y7VJP1;E9Q401	A0A1Y7VJP1|A0A1Y7VJP1_MOUSE Ryanodine receptor 2 (Fragment) OS=Mus musculus OX=10090 GN=Ryr2 PE=1 SV=1
old/young	-0.412	0.0385923	1.4135	97.14	0.607	3	21	inferred	Q9JKR6	Q9JKR6|HYOU1_MOUSE Hypoxia up-regulated protein 1 OS=Mus musculus OX=10090 GN=Hyou1 PE=1 SV=1
old/young	-1.401	0.116942	0.932031	294.34	0.608	1	1	inferred	Q8BUV8	Q8BUV8|GP107_MOUSE Protein GPR107 OS=Mus musculus OX=10090 GN=Gpr107 PE=1 SV=2
old/young	-0.49	0.117441	0.930179	295.6	0.608	3	3	inferred	Q8BH44	Q8BH44|COR2B_MOUSE Coronin-2B OS=Mus musculus OX=10090 GN=Coro2b PE=1 SV=2
old/young	0.65	0.0567358	1.24614	142.8	0.608	3	2	inferred	O88531	O88531|PPT1_MOUSE Palmitoyl-protein thioesterase 1 OS=Mus musculus OX=10090 GN=Ppt1 PE=1 SV=2
old/young	0.577	0.0572357	1.24233	144.06	0.608	3	5	inferred	Q8BXV2	Q8BXV2|BRI3B_MOUSE BRI3-binding protein OS=Mus musculus OX=10090 GN=Bri3bp PE=1 SV=1
old/young	-0.634	0.0564859	1.24806	142.17	0.608	3	2	unresolved	Q7TMM9;Q922F4;Q9CWF2	Q7TMM9|TBB2A_MOUSE Tubulin beta-2A chain OS=Mus musculus OX=10090 GN=Tubb2a PE=1 SV=1
old/young	-1.755	0.0569858	1.24423	143.43	0.608	1	1	inferred	rev_Q3UKK2	Q3UKK2|CEAM5_MOUSE reversed Carcinoembryonic antigen-related cell adhesion molecule 5 OS=Mus musculus OX=10090 GN=Ceacam5 PE=2 SV=1
old/young	0.305	0.11944	0.922849	300.63	0.609	3	13	inferred	Q9DCN2	Q9DCN2|NB5R3_MOUSE NADH-cytochrome b5 reductase 3 OS=Mus musculus OX=10090 GN=Cyb5r3 PE=1 SV=3
old/young	-0.496	0.11994	0.921036	301.89	0.609	3	2	inferred	O88485	O88485|DC1I1_MOUSE Cytoplasmic dynein 1 intermediate chain 1 OS=Mus musculus OX=10090 GN=Dync1i1 PE=1 SV=2
old/young	0.406	0.11994	0.921036	130.85	0.609	3	5	inferred	P60202	P60202|MYPR_MOUSE Myelin proteolipid protein OS=Mus musculus OX=10090 GN=Plp1 PE=1 SV=2
old/young	0.837	0.0522369	1.28202	131.48	0.609	3	1	inferred	Q9CX13	Q9CX13|CNIH4_MOUSE Protein cornichon homolog 4 OS=Mus musculus OX=10090 GN=Cnih4 PE=2 SV=1
old/young	0.665	0.0524869	1.27995	132.11	0.609	3	3	inferred	O08576	O08576|RUN3A_MOUSE RUN domain-containing protein 3A OS=Mus musculus OX=10090 GN=Rundc3a PE=1 SV=1
old/young	0.478	0.0539865	1.26771	135.88	0.609	3	3	inferred	Q9CQU3	Q9CQU3|RER1_MOUSE Protein RER1 OS=Mus musculus OX=10090 GN=Rer1 PE=1 SV=1
old/young	-0.504	0.0437912	1.35861	110.22	0.609	3	7	inferred	Q91XD7	Q91XD7|CREL1_MOUSE Cysteine-rich with EGF-like domain protein 1 OS=Mus musculus OX=10090 GN=Creld1 PE=1 SV=1
old/young	-0.626	0.0537366	1.26973	135.25	0.609	3	3	inferred	P70232	P70232|NCHL1_MOUSE Neural cell adhesion molecule L1-like protein OS=Mus musculus OX=10090 GN=Chl1 PE=1 SV=2
old/young	0.681	0.118941	0.92467	299.37	0.61	2	1	inferred	Q9D883	Q9D883|U2AF1_MOUSE Splicing factor U2AF 35 kDa subunit OS=Mus musculus OX=10090 GN=U2af1 PE=1 SV=4
old/young	-0.256	0.11944	0.922849	300.63	0.61	3	27	inferred	O08553	O08553|DPYL2_MOUSE Dihydropyrimidinase-related protein 2 OS=Mus musculus OX=10090 GN=Dpysl2 PE=1 SV=2
old/young	0.601	0.11994	0.921036	301.89	0.61	3	1	inferred	P35123	P35123|UBP4_MOUSE Ubiquitin carboxyl-terminal hydrolase 4 OS=Mus musculus OX=10090 GN=Usp4 PE=1 SV=3
old/young	0.488	0.12044	0.91923	303.15	0.61	3	2	inferred	O70378	O70378|EMC8_MOUSE ER membrane protein complex subunit 8 OS=Mus musculus OX=10090 GN=Emc8 PE=1 SV=1
old/young	0.938	0.0562359	1.24999	141.55	0.61	2	1	inferred	rev_Q8CIW6	Q8CIW6|S26A6_MOUSE reversed Solute carrier family 26 member 6 OS=Mus musculus OX=10090 GN=Slc26a6 PE=1 SV=2
old/young	0.449	0.0564859	1.24806	142.17	0.61	3	5	inferred	Q99P58	Q99P58|RB27B_MOUSE Ras-related protein Rab-27B OS=Mus musculus OX=10090 GN=Rab27b PE=1 SV=3
old/young	-0.357	0.0435913	1.3606	109.72	0.61	3	27	inferred	Q8VDD5	Q8VDD5|MYH9_MOUSE Myosin-9 OS=Mus musculus OX=10090 GN=Myh9 PE=1 SV=4
old/young	-0.416	0.0552362	1.25778	139.03	0.61	3	12	inferred	E9PZM8	E9PZM8|E9PZM8_MOUSE Neuronal pentraxin receptor OS=Mus musculus OX=10090 GN=Nptxr PE=1 SV=2
old/young	-0.283	0.0554861	1.25582	139.66	0.61	3	97	inferred	Q9JHU4	Q9JHU4|DYHC1_MOUSE Cytoplasmic dynein 1 heavy chain 1 OS=Mus musculus OX=10090 GN=Dync1h1 PE=1 SV=2
old/young	0.46	0.118941	0.92467	299.37	0.611	3	2	inferred	Q9CQZ5	Q9CQZ5|NDUA6_MOUSE NADH dehydrogenase [ubiquinone] 1 alpha subcomplex subunit 6 OS=Mus musculus OX=10090 GN=Ndufa6 PE=1 SV=1
old/young	0.554	0.11944	0.922849	300.63	0.611	3	1	unresolved	Q6IFX2;Q9QWL7	Q6IFX2|K1C42_MOUSE Keratin, type I cytoskeletal 42 OS=Mus musculus OX=10090 GN=Krt42 PE=1 SV=1
old/young	0.542	0.12094	0.917432	304.4	0.611	3	1	inferred	P22723-2	P22723-2|GBRG2_MOUSE Isoform 2S of Gamma-aminobutyric acid receptor subunit gamma-2 OS=Mus musculus OX=10090 GN=Gabrg2
old/young	0.49	0.121939	0.913857	306.92	0.611	3	1	inferred	Q8BI08	Q8BI08|MAL2_MOUSE Protein MAL2 OS=Mus musculus OX=10090 GN=Mal2 PE=1 SV=1
old/young	0.568	0.0441912	1.35466	111.23	0.611	3	3	inferred	Q921L3	Q921L3|TMCO1_MOUSE Calcium load-activated calcium channel OS=Mus musculus OX=10090 GN=Tmco1 PE=1 SV=1
old/young	0.349	0.0443911	1.3527	111.73	0.611	3	17	inferred	Q8BMF4	Q8BMF4|ODP2_MOUSE Dihydrolipoyllysine-residue acetyltransferase component of pyruvate dehydrogenase complex, mitochondrial OS=Mus musculus OX=10090 GN=Dlat PE=1 SV=2
old/young	0.537	0.0494876	1.3055	124.56	0.611	3	3	unresolved	P28663;Q9DB05	P28663|SNAB_MOUSE Beta-soluble NSF attachment protein OS=Mus musculus OX=10090 GN=Napb PE=1 SV=2
old/young	0.605	0.0507373	1.29467	127.71	0.611	3	2	inferred	P17809	P17809|GTR1_MOUSE Solute carrier family 2, facilitated glucose transporter member 1 OS=Mus musculus OX=10090 GN=Slc2a1 PE=1 SV=4
old/young	0.765	0.0517371	1.2862	130.22	0.611	3	1	inferred	Q3TXX3	Q3TXX3|ZFY27_MOUSE Protrudin OS=Mus musculus OX=10090 GN=Zfyve27 PE=1 SV=2
old/young	-0.515	0.0509873	1.29254	128.33	0.611	3	4	inferred	A0A087WP33	A0A087WP33|A0A087WP33_MOUSE Autophagy-related protein 9 (Fragment) OS=Mus musculus OX=10090 GN=Atg9a PE=1 SV=1
old/young	-0.427	0.0514871	1.2883	129.59	0.611	3	5	unresolved	E9Q1F5;Q99104	E9Q1F5|E9Q1F5_MOUSE Myosin VC OS=Mus musculus OX=10090 GN=Myo5c PE=1 SV=1
old/young	-0.556	0.051987	1.28411	130.85	0.611	3	3	unresolved	P11798;Q6PHZ2-5	P11798|KCC2A_MOUSE Calcium/calmodulin-dependent protein kinase type II subunit alpha OS=Mus musculus OX=10090 GN=Camk2a PE=1 SV=2
old/young	0.387	0.0544864	1.26371	137.14	0.612	3	12	inferred	B2RSH2	B2RSH2|GNAI1_MOUSE Guanine nucleotide-binding protein G(i) subunit alpha-1 OS=Mus musculus OX=10090 GN=Gnai1 PE=1 SV=1
old/young	0.517	0.0549863	1.25975	138.4	0.612	3	4	inferred	Q9Z2G6	Q9Z2G6|SE1L1_MOUSE Protein sel-1 homolog 1 OS=Mus musculus OX=10090 GN=Sel1l PE=1 SV=2
old/young	0.426	0.0552362	1.25778	139.03	0.612	3	7	inferred	Q0VGU4	Q0VGU4|Q0VGU4_MOUSE MCG18019 OS=Mus musculus OX=10090 GN=Vgf PE=1 SV=1
old/young	-0.685	0.121439	0.915641	305.66	0.613	3	1	inferred	Q80TF6	Q80TF6|STAR9_MOUSE StAR-related lipid transfer protein 9 OS=Mus musculus OX=10090 GN=Stard9 PE=1 SV=2
old/young	0.5	0.121939	0.913857	306.92	0.613	3	1	unresolved	B2RSH2;P08752;Q9DC51	B2RSH2|GNAI1_MOUSE Guanine nucleotide-binding protein G(i) subunit alpha-1 OS=Mus musculus OX=10090 GN=Gnai1 PE=1 SV=1
old/young	-0.284	0.122439	0.912081	308.18	0.613	3	31	inferred	P17426	P17426|AP2A1_MOUSE AP-2 complex subunit alpha-1 OS=Mus musculus OX=10090 GN=Ap2a1 PE=1 SV=1
old/young	-0.435	0.121939	0.913857	306.92	0.614	3	3	unresolved	F6U3S2;Q8CBH5	F6U3S2|F6U3S2_MOUSE Major facilitator superfamily domain-containing protein 6 (Fragment) OS=Mus musculus OX=10090 GN=Mfsd6 PE=1 SV=1
old/young	-0.774	0.122939	0.910312	309.44	0.614	2	1	inferred	Q8CD76	Q8CD76|Q8CD76_MOUSE Kinesin light chain 1 OS=Mus musculus OX=10090 GN=Klc1 PE=1 SV=1
old/young	-0.395	0.123438	0.90855	310.69	0.614	3	6	inferred	P07724	P07724|ALBU_MOUSE Serum albumin OS=Mus musculus OX=10090 GN=Alb PE=1 SV=3
old/young	0.632	0.0494876	1.3055	124.56	0.614	3	3	inferred	P97384	P97384|ANX11_MOUSE Annexin A11 OS=Mus musculus OX=10090 GN=Anxa11 PE=1 SV=2
old/young	0.376	0.0499875	1.30114	125.82	0.614	3	11	inferred	O35136	O35136|NCAM2_MOUSE Neural cell adhesion molecule 2 OS=Mus musculus OX=10090 GN=Ncam2 PE=1 SV=1
old/young	0.895	0.0514871	1.2883	129.59	0.614	3	1	inferred	O88741	O88741|GDAP1_MOUSE Ganglioside-induced differentiation-associated protein 1 OS=Mus musculus OX=10090 GN=Gdap1 PE=1 SV=1
old/young	-1.379	0.0492377	1.3077	123.93	0.614	1	1	inferred	Q9JMG3	Q9JMG3|TMUB1_MOUSE Transmembrane and ubiquitin-like domain-containing protein 1 OS=Mus musculus OX=10090 GN=Tmub1 PE=1 SV=1
old/young	-0.4	0.0507373	1.29467	127.71	0.614	3	11	unresolved	A0A1W2P7Y9;Q810U4-2	A0A1W2P7Y9|A0A1W2P7Y9_MOUSE Neuronal cell adhesion molecule OS=Mus musculus OX=10090 GN=Nrcam PE=1 SV=1
old/young	0.401	0.123438	0.90855	310.69	0.615	3	6	inferred	Q64487	Q64487|PTPRD_MOUSE Receptor-type tyrosine-protein phosphatase delta OS=Mus musculus OX=10090 GN=Ptprd PE=1 SV=3
old/young	0.834	0.0549863	1.25975	138.4	0.615	3	1	inferred	Q99K10	Q99K10|NLGN1_MOUSE Neuroligin-1 OS=Mus musculus OX=10090 GN=Nlgn1 PE=1 SV=2
old/young	1.133	0.0484879	1.31437	122.04	0.616	2	1	inferred	Q6VNB8	Q6VNB8|WDFY3_MOUSE WD repeat and FYVE domain-containing protein 3 OS=Mus musculus OX=10090 GN=Wdfy3 PE=1 SV=1
old/young	0.5	0.0492377	1.3077	123.93	0.617	3	4	unresolved	P21278;P21279	P21278|GNA11_MOUSE Guanine nucleotide-binding protein subunit alpha-11 OS=Mus musculus OX=10090 GN=Gna11 PE=1 SV=1
old/young	0.515	0.0507373	1.29467	127.71	0.617	3	4	unresolved	P61226;Q80ZJ1	P61226|RAP2B_MOUSE Ras-related protein Rap-2b OS=Mus musculus OX=10090 GN=Rap2b PE=1 SV=1
old/young	-0.686	0.0489878	1.30991	123.3	0.617	3	4	inferred	Q9QZB7	Q9QZB7|ARP10_MOUSE Actin-related protein 10 OS=Mus musculus OX=10090 GN=Actr10 PE=1 SV=2
old/young	-0.88	0.0504874	1.29682	127.08	0.617	3	1	unresolved	Q8VIJ6;Q99K48	Q8VIJ6|SFPQ_MOUSE Splicing factor, proline- and glutamine-rich OS=Mus musculus OX=10090 GN=Sfpq PE=1 SV=1
old/young	1.235	0.124438	0.905048	313.21	0.618	3	8	inferred	Q9CXR1	Q9CXR1|DHRS7_MOUSE Dehydrogenase/reductase SDR family member 7 OS=Mus musculus OX=10090 GN=Dhrs7 PE=1 SV=2
old/young	1.897	0.0459885	1.33735	115.75	0.619	1	1	inferred	Q8K2M0	Q8K2M0|RM38_MOUSE 39S ribosomal protein L38, mitochondrial OS=Mus musculus OX=10090 GN=Mrpl38 PE=1 SV=2
old/young	1.694	0.0464884	1.33266	117.01	0.619	1	1	inferred	P62806	P62806|H4_MOUSE Histone H4 OS=Mus musculus OX=10090 GN=Hist1h4a PE=1 SV=2
old/young	-0.457	0.0472382	1.32571	118.9	0.619	3	9	inferred	Q80Z24	Q80Z24|NEGR1_MOUSE Neuronal growth regulator 1 OS=Mus musculus OX=10090 GN=Negr1 PE=1 SV=1
old/young	1.693	0.0455909	1.34112	114.75	0.62	1	1	inferred	P46978	P46978|STT3A_MOUSE Dolichyl-diphosphooligosaccharide--protein glycosyltransferase subunit STT3A OS=Mus musculus OX=10090 GN=Stt3a PE=1 SV=1
old/young	0.937	0.0484879	1.31437	122.04	0.62	3	1	unresolved	O88952;Q8JZS0	O88952|LIN7C_MOUSE Protein lin-7 homolog C OS=Mus musculus OX=10090 GN=Lin7c PE=1 SV=2
old/young	-0.382	0.0489878	1.30991	123.3	0.62	3	10	inferred	Q9R1V6	Q9R1V6|ADA22_MOUSE Disintegrin and metalloproteinase domain-containing protein 22 OS=Mus musculus OX=10090 GN=Adam22 PE=1 SV=2
old/young	0.834	0.0453909	1.34303	114.25	0.621	3	1	inferred	Q9DCS9	Q9DCS9|NDUBA_MOUSE NADH dehydrogenase [ubiquinone] 1 beta subcomplex subunit 10 OS=Mus musculus OX=10090 GN=Ndufb10 PE=1 SV=3
old/young	-0.283	0.125437	0.901573	315.73	0.622	3	24	inferred	P47857	P47857|PFKAM_MOUSE ATP-dependent 6-phosphofructokinase, muscle type OS=Mus musculus OX=10090 GN=Pfkm PE=1 SV=3
old/young	0.626	0.125937	0.899847	316.98	0.622	3	1	inferred	Q07417	Q07417|ACADS_MOUSE Short-chain specific acyl-CoA dehydrogenase, mitochondrial OS=Mus musculus OX=10090 GN=Acads PE=1 SV=2
old/young	0.823	0.0464884	1.33266	117.01	0.622	3	1	inferred	Q9CQQ7	Q9CQQ7|AT5F1_MOUSE ATP synthase F(0) complex subunit B1, mitochondrial OS=Mus musculus OX=10090 GN=Atp5f1 PE=1 SV=1
old/young	0.525	0.0469883	1.32801	118.27	0.622	3	3	inferred	Q9EPR4	Q9EPR4|S23A2_MOUSE Solute carrier family 23 member 2 OS=Mus musculus OX=10090 GN=Slc23a2 PE=1 SV=2
old/young	-0.802	0.0459885	1.33735	115.75	0.622	3	2	inferred	Q64314-2	Q64314-2|CD34_MOUSE Isoform Short of Hematopoietic progenitor cell antigen CD34 OS=Mus musculus OX=10090 GN=Cd34
old/young	-0.574	0.125937	0.899847	316.98	0.623	3	1	inferred	Q8K4Q7	Q8K4Q7|CERK1_MOUSE Ceramide kinase OS=Mus musculus OX=10090 GN=Cerk PE=2 SV=2
old/young	-0.326	0.126437	0.898127	318.24	0.623	3	9	inferred	P14152	P14152|MDHC_MOUSE Malate dehydrogenase, cytoplasmic OS=Mus musculus OX=10090 GN=Mdh1 PE=1 SV=3
old/young	0.962	0.0484879	1.31437	122.04	0.623	3	1	inferred	Q3UZP4	Q3UZP4|SVIP_MOUSE Small VCP/p97-interacting protein OS=Mus musculus OX=10090 GN=Svip PE=3 SV=1
old/young	-0.928	0.0472382	1.32571	118.9	0.623	3	1	unresolved	P06151;P16125	P06151|LDHA_MOUSE L-lactate dehydrogenase A chain OS=Mus musculus OX=10090 GN=Ldha PE=1 SV=3
old/young	-0.798	0.0477381	1.32114	120.16	0.623	3	2	inferred	Q3UHJ0	Q3UHJ0|AAK1_MOUSE AP2-associated protein kinase 1 OS=Mus musculus OX=10090 GN=Aak1 PE=1 SV=2
old/young	0.397	0.127436	0.894707	320.76	0.624	3	5	inferred	Q9D394	Q9D394|RUFY3_MOUSE Protein RUFY3 OS=Mus musculus OX=10090 GN=Rufy3 PE=1 SV=1
old/young	0.529	0.127436	0.894707	320.76	0.625	3	1	unresolved	O08807;P35700	O08807|PRDX4_MOUSE Peroxiredoxin-4 OS=Mus musculus OX=10090 GN=Prdx4 PE=1 SV=1
old/young	0.529	0.127936	0.893007	322.01	0.625	3	2	inferred	Q62083	Q62083|PICK1_MOUSE PRKCA-binding protein OS=Mus musculus OX=10090 GN=Pick1 PE=1 SV=2
old/young	-0.466	0.127436	0.894707	320.76	0.626	3	4	inferred	P11835	P11835|ITB2_MOUSE Integrin beta-2 OS=Mus musculus OX=10090 GN=Itgb2 PE=1 SV=2
old/young	0.842	0.0484879	1.31437	122.04	0.626	3	1	inferred	E9QAS7	E9QAS7|E9QAS7_MOUSE Inositol polyphosphate-5-phosphatase A OS=Mus musculus OX=10090 GN=Inpp5a PE=1 SV=1
old/young	0.396	0.132934	0.876365	334.59	0.627	3	5	inferred	Q91VD9	Q91VD9|NDUS1_MOUSE NADH-ubiquinone oxidoreductase 75 kDa subunit, mitochondrial OS=Mus musculus OX=10090 GN=Ndufs1 PE=1 SV=2
old/young	0.321	0.131934	0.879643	332.08	0.628	3	8	inferred	Q8VDQ8-2	Q8VDQ8-2|SIR2_MOUSE Isoform 2 of NAD-dependent protein deacetylase sirtuin-2 OS=Mus musculus OX=10090 GN=Sirt2
old/young	0.471	0.132434	0.878001	333.34	0.628	3	2	inferred	P63137	P63137|GBRB2_MOUSE Gamma-aminobutyric acid receptor subunit beta-2 OS=Mus musculus OX=10090 GN=Gabrb2 PE=1 SV=2
old/young	0.421	0.132934	0.876365	334.59	0.628	3	2	inferred	Q8VBV7	Q8VBV7|CSN8_MOUSE COP9 signalosome complex subunit 8 OS=Mus musculus OX=10090 GN=Cops8 PE=1 SV=1
old/young	0.443	0.133433	0.874736	335.85	0.628	3	3	inferred	P63082	P63082|VATL_MOUSE V-type proton ATPase 16 kDa proteolipid subunit OS=Mus musculus OX=10090 GN=Atp6v0c PE=1 SV=1
old/young	-0.594	0.0483903	1.31524	121.8	0.628	3	4	inferred	Q7TMK9	Q7TMK9|HNRPQ_MOUSE Heterogeneous nuclear ribonucleoprotein Q OS=Mus musculus OX=10090 GN=Syncrip PE=1 SV=2
old/young	-0.588	0.131934	0.879643	332.08	0.629	3	1	inferred	P49442	P49442|INPP_MOUSE Inositol polyphosphate 1-phosphatase OS=Mus musculus OX=10090 GN=Inpp1 PE=1 SV=2
old/young	0.398	0.132434	0.878001	333.34	0.629	3	3	inferred	P60766-1	P60766-1|CDC42_MOUSE Isoform 1 of Cell division control protein 42 homolog OS=Mus musculus OX=10090 GN=Cdc42
old/young	-0.5	0.132934	0.876365	334.59	0.629	3	2	inferred	Q61037	Q61037|TSC2_MOUSE Tuberin OS=Mus musculus OX=10090 GN=Tsc2 PE=1 SV=1
old/young	0.436	0.133933	0.873112	337.11	0.629	3	2	inferred	Q3TFQ1	Q3TFQ1|SPRY7_MOUSE SPRY domain-containing protein 7 OS=Mus musculus OX=10090 GN=Spryd7 PE=1 SV=2
old/young	0.363	0.129435	0.887947	325.79	0.63	3	4	inferred	P18242	P18242|CATD_MOUSE Cathepsin D OS=Mus musculus OX=10090 GN=Ctsd PE=1 SV=1
old/young	0.268	0.131434	0.881291	330.82	0.63	3	12	inferred	Q61490	Q61490|CD166_MOUSE CD166 antigen OS=Mus musculus OX=10090 GN=Alcam PE=1 SV=3
old/young	0.62	0.131934	0.879643	332.08	0.63	3	1	inferred	Q8BK64	Q8BK64|AHSA1_MOUSE Activator of 90 kDa heat shock protein ATPase homolog 1 OS=Mus musculus OX=10090 GN=Ahsa1 PE=1 SV=2
old/young	0.418	0.134433	0.871495	338.37	0.63	3	2	inferred	Q80TS3	Q80TS3|AGRL3_MOUSE Adhesion G protein-coupled receptor L3 OS=Mus musculus OX=10090 GN=Adgrl3 PE=1 SV=3
old/young	-0.274	0.14093	0.850998	354.72	0.63	3	9	inferred	P62754	P62754|RS6_MOUSE 40S ribosomal protein S6 OS=Mus musculus OX=10090 GN=Rps6 PE=1 SV=1
old/young	-0.41	0.129435	0.887947	325.79	0.631	3	5	inferred	Q3TWI9	Q3TWI9|CSCL2_MOUSE CSC1-like protein 2 OS=Mus musculus OX=10090 GN=Tmem63b PE=1 SV=1
old/young	0.654	0.129935	0.886274	327.05	0.631	2	1	unresolved	E9Q1V2;Q1RLL3;Q8JZW4	E9Q1V2|E9Q1V2_MOUSE Copine-5 (Fragment) OS=Mus musculus OX=10090 GN=Cpne5 PE=1 SV=1
old/young	-0.61	0.130935	0.882946	329.56	0.631	3	1	inferred	Q9CZJ2	Q9CZJ2|HS12B_MOUSE Heat shock 70 kDa protein 12B OS=Mus musculus OX=10090 GN=Hspa12b PE=1 SV=1
old/young	-0.269	0.131434	0.881291	330.82	0.631	3	20	inferred	Q68FG2	Q68FG2|Q68FG2_MOUSE Spectrin beta chain OS=Mus musculus OX=10090 GN=Sptbn2 PE=1 SV=1
old/young	0.367	0.131934	0.879643	332.08	0.631	3	5	inferred	Q61598	Q61598|GDIB_MOUSE Rab GDP dissociation inhibitor beta OS=Mus musculus OX=10090 GN=Gdi2 PE=1 SV=1
old/young	0.383	0.134933	0.869883	339.63	0.631	3	7	inferred	P17742	P17742|PPIA_MOUSE Peptidyl-prolyl cis-trans isomerase A OS=Mus musculus OX=10090 GN=Ppia PE=1 SV=2
old/young	0.317	0.14093	0.850998	354.72	0.631	3	8	inferred	Q60737	Q60737|CSK21_MOUSE Casein kinase II subunit alpha OS=Mus musculus OX=10090 GN=Csnk2a1 PE=1 SV=2
old/young	0.446	0.141429	0.849461	355.98	0.631	3	3	inferred	Q8CHX7	Q8CHX7|RFTN2_MOUSE Raftlin-2 OS=Mus musculus OX=10090 GN=Rftn2 PE=1 SV=3
old/young	1.413	0.14093	0.850998	354.72	0.632	3	3	inferred	P04104	P04104|K2C1_MOUSE Keratin, type II cytoskeletal 1 OS=Mus musculus OX=10090 GN=Krt1 PE=1 SV=4
old/young	-0.334	0.141929	0.847929	357.24	0.632	3	6	inferred	P28656	P28656|NP1L1_MOUSE Nucleosome assembly protein 1-like 1 OS=Mus musculus OX=10090 GN=Nap1l1 PE=1 SV=2
old/young	-0.546	0.130935	0.882946	329.56	0.633	3	1	unresolved	G5E8K5;Q02357;Q8C8R3-2	G5E8K5|ANK3_MOUSE Ankyrin-3 OS=Mus musculus OX=10090 GN=Ank3 PE=1 SV=1
old/young	-0.26	0.131434	0.881291	330.82	0.633	3	19	inferred	Q9JIS5	Q9JIS5|SV2A_MOUSE Synaptic vesicle glycoprotein 2A OS=Mus musculus OX=10090 GN=Sv2a PE=1 SV=1
old/young	-0.545	0.13993	0.854089	352.2	0.633	3	1	inferred	rev_E9QM99	E9QM99|E9QM99_MOUSE reversed Dedicator of cytokinesis protein 10 OS=Mus musculus OX=10090 GN=Dock10 PE=1 SV=1
old/young	0.566	0.14043	0.852541	353.46	0.633	3	1	inferred	Q924D1	Q924D1|Q924D1_MOUSE Cytochrome P450 CYP2J9 OS=Mus musculus OX=10090 GN=Cyp2j9 PE=1 SV=1
old/young	0.509	0.14093	0.850998	354.72	0.633	3	1	unresolved	Q6PA06;Q8BH66	Q6PA06|ATLA2_MOUSE Atlastin-2 OS=Mus musculus OX=10090 GN=Atl2 PE=1 SV=1
old/young	-0.39	0.130935	0.882946	329.56	0.634	3	4	inferred	Q9Z2C4	Q9Z2C4|MTMR1_MOUSE Myotubularin-related protein 1 OS=Mus musculus OX=10090 GN=Mtmr1 PE=1 SV=1
old/young	0.283	0.130935	0.882946	329.56	0.635	3	14	inferred	Q9D710	Q9D710|TMX2_MOUSE Thioredoxin-related transmembrane protein 2 OS=Mus musculus OX=10090 GN=Tmx2 PE=1 SV=1
old/young	0.566	0.137931	0.860338	347.17	0.635	3	1	inferred	Q9CZX7	Q9CZX7|PP4P2_MOUSE Type 2 phosphatidylinositol 4,5-bisphosphate 4-phosphatase OS=Mus musculus OX=10090 GN=Pip4p2 PE=1 SV=1
old/young	0.436	0.138931	0.857202	349.69	0.635	3	2	inferred	Q9D1Q4	Q9D1Q4|DPM3_MOUSE Dolichol-phosphate mannosyltransferase subunit 3 OS=Mus musculus OX=10090 GN=Dpm3 PE=1 SV=1
old/young	0.542	0.13943	0.855643	350.95	0.635	2	3	inferred	Q9WTS2	Q9WTS2|FUT8_MOUSE Alpha-(1,6)-fucosyltransferase OS=Mus musculus OX=10090 GN=Fut8 PE=1 SV=2
old/young	0.394	0.13993	0.854089	352.2	0.635	3	3	inferred	Q9D0M3	Q9D0M3|CY1_MOUSE Cytochrome c1, heme protein, mitochondrial OS=Mus musculus OX=10090 GN=Cyc1 PE=1 SV=1
old/young	-0.442	0.14043	0.852541	353.46	0.635	3	3	inferred	P18826	P18826|KPB1_MOUSE Phosphorylase b kinase regulatory subunit alpha, skeletal muscle isoform OS=Mus musculus OX=10090 GN=Phka1 PE=1 SV=3
old/young	-0.581	0.14093	0.850998	354.72	0.635	3	1	unresolved	P28867;P68404-2;Q4VA93	P28867|KPCD_MOUSE Protein kinase C delta type OS=Mus musculus OX=10090 GN=Prkcd PE=1 SV=3
old/young	-0.314	0.136432	0.865084	343.4	0.636	3	17	inferred	Q8CIE6	Q8CIE6|COPA_MOUSE Coatomer subunit alpha OS=Mus musculus OX=10090 GN=Copa PE=1 SV=2
old/young	0.598	0.136932	0.863497	344.66	0.636	3	1	inferred	rev_P28271	P28271|ACOC_MOUSE reversed Cytoplasmic aconitate hydratase OS=Mus musculus OX=10090 GN=Aco1 PE=1 SV=3
old/young	0.461	0.137931	0.860338	347.17	0.636	3	2	inferred	Q61016	Q61016|GBG7_MOUSE Guanine nucleotide-binding protein G(I)/G(S)/G(O) subunit gamma-7 OS=Mus musculus OX=10090 GN=Gng7 PE=1 SV=2
old/young	-0.242	0.138431	0.858767	348.43	0.636	3	28	inferred	P63318	P63318|KPCG_MOUSE Protein kinase C gamma type OS=Mus musculus OX=10090 GN=Prkcg PE=1 SV=1
old/young	-0.497	0.138931	0.857202	349.69	0.636	3	2	inferred	P56818	P56818|BACE1_MOUSE Beta-secretase 1 OS=Mus musculus OX=10090 GN=Bace1 PE=1 SV=2
old/young	-0.363	0.13943	0.855643	350.95	0.636	3	5	inferred	Q8C0C7	Q8C0C7|SYFA_MOUSE Phenylalanine--tRNA ligase alpha subunit OS=Mus musculus OX=10090 GN=Farsa PE=1 SV=1
old/young	-0.225	0.13993	0.854089	352.2	0.636	3	57	inferred	O55143	O55143|AT2A2_MOUSE Sarcoplasmic/endoplasmic reticulum calcium ATPase 2 OS=Mus musculus OX=10090 GN=Atp2a2 PE=1 SV=2
old/young	0.318	0.136432	0.865084	343.4	0.637	3	6	inferred	O88587	O88587|COMT_MOUSE Catechol O-methyltransferase OS=Mus musculus OX=10090 GN=Comt PE=1 SV=2
old/young	0.614	0.136932	0.863497	344.66	0.637	3	1	inferred	P97371	P97371|PSME1_MOUSE Proteasome activator complex subunit 1 OS=Mus musculus OX=10090 GN=Psme1 PE=1 SV=2
old/young	-0.285	0.137431	0.861914	345.91	0.637	3	11	inferred	Q00493	Q00493|CBPE_MOUSE Carboxypeptidase E OS=Mus musculus OX=10090 GN=Cpe PE=1 SV=2
old/young	0.556	0.137931	0.860338	347.17	0.637	3	1	inferred	P03995	P03995|GFAP_MOUSE Glial fibrillary acidic protein OS=Mus musculus OX=10090 GN=Gfap PE=1 SV=4
old/young	0.345	0.138931	0.857202	349.69	0.637	3	4	inferred	Q9DB72	Q9DB72|BTBDH_MOUSE BTB/POZ domain-containing protein 17 OS=Mus musculus OX=10090 GN=Btbd17 PE=1 SV=1
old/young	-1.133	0.137931	0.860338	347.17	0.638	1	1	inferred	P05480	P05480|SRC_MOUSE Neuronal proto-oncogene tyrosine-protein kinase Src OS=Mus musculus OX=10090 GN=Src PE=1 SV=4
old/young	-0.521	0.143428	0.843365	361.01	0.638	3	1	inferred	A8C756	A8C756|THADA_MOUSE Thyroid adenoma-associated protein homolog OS=Mus musculus OX=10090 GN=Thada PE=1 SV=1
old/young	0.375	0.143928	0.841855	362.27	0.639	3	5	inferred	Q8C561	Q8C561|LMBD2_MOUSE LMBR1 domain-containing protein 2 OS=Mus musculus OX=10090 GN=Lmbrd2 PE=1 SV=1
old/young	0.328	0.144928	0.838849	364.78	0.64	3	5	inferred	Q80TJ1	Q80TJ1|CAPS1_MOUSE Calcium-dependent secretion activator 1 OS=Mus musculus OX=10090 GN=Cadps PE=1 SV=3
old/young	0.395	0.144928	0.838849	364.78	0.641	3	3	inferred	Q6TEK5	Q6TEK5|VKORL_MOUSE Vitamin K epoxide reductase complex subunit 1-like protein 1 OS=Mus musculus OX=10090 GN=Vkorc1l1 PE=1 SV=1
old/young	0.349	0.145427	0.837354	366.04	0.641	3	6	inferred	A2AP18	A2AP18|PLCH2_MOUSE 1-phosphatidylinositol 4,5-bisphosphate phosphodiesterase eta-2 OS=Mus musculus OX=10090 GN=Plch2 PE=1 SV=2
old/young	0.388	0.146427	0.834379	368.56	0.641	3	3	inferred	Q8BHK1	Q8BHK1|NIPA1_MOUSE Magnesium transporter NIPA1 OS=Mus musculus OX=10090 GN=Nipa1 PE=1 SV=1
old/young	0.374	0.146927	0.8329	369.81	0.641	3	5	inferred	Q99N28	Q99N28|CADM3_MOUSE Cell adhesion molecule 3 OS=Mus musculus OX=10090 GN=Cadm3 PE=1 SV=1
old/young	0.437	0.144928	0.838849	364.78	0.642	3	2	inferred	Q62048	Q62048|PEA15_MOUSE Astrocytic phosphoprotein PEA-15 OS=Mus musculus OX=10090 GN=Pea15 PE=1 SV=1
old/young	0.388	0.145927	0.835864	367.3	0.642	3	4	inferred	Q8BPU7	Q8BPU7|ELMO1_MOUSE Engulfment and cell motility protein 1 OS=Mus musculus OX=10090 GN=Elmo1 PE=1 SV=2
old/young	0.41	0.146427	0.834379	368.56	0.642	3	2	inferred	P63260	P63260|ACTG_MOUSE Actin, cytoplasmic 2 OS=Mus musculus OX=10090 GN=Actg1 PE=1 SV=1
old/young	0.492	0.146927	0.8329	369.81	0.642	3	1	inferred	P84086	P84086|CPLX2_MOUSE Complexin-2 OS=Mus musculus OX=10090 GN=Cplx2 PE=1 SV=1
old/young	0.48	0.147426	0.831425	371.07	0.642	3	2	inferred	O35188	O35188|X3CL1_MOUSE Fractalkine OS=Mus musculus OX=10090 GN=Cx3cl1 PE=1 SV=3
old/young	0.437	0.146427	0.834379	368.56	0.643	3	2	inferred	Q61937	Q61937|NPM_MOUSE Nucleophosmin OS=Mus musculus OX=10090 GN=Npm1 PE=1 SV=1
old/young	0.468	0.147926	0.829955	372.33	0.643	3	2	inferred	Q8K1Z0	Q8K1Z0|COQ9_MOUSE Ubiquinone biosynthesis protein COQ9, mitochondrial OS=Mus musculus OX=10090 GN=Coq9 PE=1 SV=1
old/young	0.542	0.148926	0.827031	374.85	0.646	3	1	inferred	E9Q4Z2	E9Q4Z2|ACACB_MOUSE Acetyl-CoA carboxylase 2 OS=Mus musculus OX=10090 GN=Acacb PE=1 SV=1
old/young	0.426	0.149425	0.825576	376.1	0.646	3	3	inferred	Q920P3	Q920P3|BRNP1_MOUSE BMP/retinoic acid-inducible neural-specific protein 1 OS=Mus musculus OX=10090 GN=Brinp1 PE=1 SV=1
old/young	0.386	0.149425	0.825576	376.1	0.647	3	3	inferred	Q91X97	Q91X97|NCALD_MOUSE Neurocalcin-delta OS=Mus musculus OX=10090 GN=Ncald PE=1 SV=4
old/young	-0.463	0.149925	0.824126	377.36	0.647	3	2	inferred	Q8BHL3	Q8BHL3|TB10B_MOUSE TBC1 domain family member 10B OS=Mus musculus OX=10090 GN=Tbc1d10b PE=1 SV=2
old/young	1.002	0.150425	0.822681	378.62	0.648	1	1	inferred	Q5SSM3	Q5SSM3|RHG44_MOUSE Rho GTPase-activating protein 44 OS=Mus musculus OX=10090 GN=Arhgap44 PE=1 SV=1
old/young	0.363	0.153923	0.812696	387.42	0.652	3	3	inferred	P62855	P62855|RS26_MOUSE 40S ribosomal protein S26 OS=Mus musculus OX=10090 GN=Rps26 PE=1 SV=3
old/young	0.552	0.153923	0.812696	387.42	0.653	3	1	unresolved	P0C192;Q8C031	P0C192|LRC4B_MOUSE Leucine-rich repeat-containing protein 4B OS=Mus musculus OX=10090 GN=Lrrc4b PE=1 SV=1
old/young	-0.658	0.151924	0.818374	382.39	0.654	2	1	inferred	Q6KAR6	Q6KAR6|EXOC3_MOUSE Exocyst complex component 3 OS=Mus musculus OX=10090 GN=Exoc3 PE=1 SV=2
old/young	0.478	0.153923	0.812696	387.42	0.654	3	2	inferred	Q9D1G3	Q9D1G3|HHATL_MOUSE Protein-cysteine N-palmitoyltransferase HHAT-like protein OS=Mus musculus OX=10090 GN=Hhatl PE=1 SV=2
old/young	0.486	0.153423	0.814109	386.17	0.655	3	2	inferred	Q9JJV2	Q9JJV2|PROF2_MOUSE Profilin-2 OS=Mus musculus OX=10090 GN=Pfn2 PE=1 SV=3
old/young	0.508	0.152924	0.815526	384.91	0.656	3	2	inferred	P01901	P01901|HA1B_MOUSE H-2 class I histocompatibility antigen, K-B alpha chain OS=Mus musculus OX=10090 GN=H2-K1 PE=1 SV=1
old/young	0.319	0.153423	0.814109	386.17	0.656	3	5	inferred	O08709	O08709|PRDX6_MOUSE Peroxiredoxin-6 OS=Mus musculus OX=10090 GN=Prdx6 PE=1 SV=3
old/young	0.574	0.153923	0.812696	387.42	0.656	3	1	inferred	Q8BSL7	Q8BSL7|ARF2_MOUSE ADP-ribosylation factor 2 OS=Mus musculus OX=10090 GN=Arf2 PE=1 SV=2
old/young	0.499	0.155422	0.808487	391.2	0.656	3	2	inferred	Q8K4Q0	Q8K4Q0|RPTOR_MOUSE Regulatory-associated protein of mTOR OS=Mus musculus OX=10090 GN=Rptor PE=1 SV=1
old/young	0.405	0.155922	0.807092	392.46	0.656	3	3	inferred	Q3UGX3	Q3UGX3|NAT8L_MOUSE N-acetylaspartate synthetase OS=Mus musculus OX=10090 GN=Nat8l PE=1 SV=1
old/young	0.466	0.157921	0.80156	397.49	0.656	3	1	unresolved	G5E863;P23819-3;Q9Z2W9	G5E863|G5E863_MOUSE Glutamate receptor 4 OS=Mus musculus OX=10090 GN=Gria4 PE=1 SV=1
old/young	0.556	0.152924	0.815526	384.91	0.657	3	1	inferred	Q8BTJ4	Q8BTJ4|ENPP4_MOUSE Bis(5'-adenosyl)-triphosphatase enpp4 OS=Mus musculus OX=10090 GN=Enpp4 PE=1 SV=1
old/young	0.379	0.153423	0.814109	386.17	0.657	3	3	inferred	D3YVF0	D3YVF0|AKAP5_MOUSE A-kinase anchor protein 5 OS=Mus musculus OX=10090 GN=Akap5 PE=1 SV=2
old/young	0.299	0.155422	0.808487	391.2	0.657	3	6	inferred	Q8R5J9	Q8R5J9|PRAF3_MOUSE PRA1 family protein 3 OS=Mus musculus OX=10090 GN=Arl6ip5 PE=1 SV=2
old/young	-0.633	0.155922	0.807092	392.46	0.657	3	1	inferred	Q8BYR5	Q8BYR5|CAPS2_MOUSE Calcium-dependent secretion activator 2 OS=Mus musculus OX=10090 GN=Cadps2 PE=1 SV=2
old/young	0.3	0.156422	0.805703	393.71	0.657	3	7	inferred	Q8C419	Q8C419|GP158_MOUSE Probable G-protein coupled receptor 158 OS=Mus musculus OX=10090 GN=Gpr158 PE=1 SV=2
old/young	0.364	0.157421	0.802937	396.23	0.657	3	6	inferred	Q99JI4	Q99JI4|PSMD6_MOUSE 26S proteasome non-ATPase regulatory subunit 6 OS=Mus musculus OX=10090 GN=Psmd6 PE=1 SV=1
old/young	0.291	0.157921	0.80156	397.49	0.657	3	7	inferred	P70414	P70414|NAC1_MOUSE Sodium/calcium exchanger 1 OS=Mus musculus OX=10090 GN=Slc8a1 PE=1 SV=1
old/young	-0.619	0.156922	0.804317	394.97	0.658	3	1	inferred	Q9EQK5	Q9EQK5|MVP_MOUSE Major vault protein OS=Mus musculus OX=10090 GN=Mvp PE=1 SV=4
old/young	0.358	0.157421	0.802937	396.23	0.658	3	4	inferred	Q8BH24	Q8BH24|TM9S4_MOUSE Transmembrane 9 superfamily member 4 OS=Mus musculus OX=10090 GN=Tm9sf4 PE=1 SV=1
old/young	-0.329	0.157921	0.80156	397.49	0.658	3	11	inferred	P59764	P59764|DOCK4_MOUSE Dedicator of cytokinesis protein 4 OS=Mus musculus OX=10090 GN=Dock4 PE=1 SV=1
old/young	-0.268	0.157421	0.802937	396.23	0.659	3	36	inferred	P19096	P19096|FAS_MOUSE Fatty acid synthase OS=Mus musculus OX=10090 GN=Fasn PE=1 SV=2
old/young	-1.251	0.16042	0.794742	403.78	0.664	1	1	inferred	Q9JHG6	Q9JHG6|RCAN1_MOUSE Calcipressin-1 OS=Mus musculus OX=10090 GN=Rcan1 PE=1 SV=2
old/young	0.305	0.16042	0.794742	403.78	0.665	3	5	inferred	Q9QYF9	Q9QYF9|NDRG3_MOUSE Protein NDRG3 OS=Mus musculus OX=10090 GN=Ndrg3 PE=1 SV=1
old/young	0.544	0.161919	0.790702	407.55	0.665	3	1	inferred	Q9D8B7	Q9D8B7|JAM3_MOUSE Junctional adhesion molecule C OS=Mus musculus OX=10090 GN=Jam3 PE=1 SV=2
old/young	0.446	0.161919	0.790702	407.55	0.666	3	3	inferred	P30275	P30275|KCRU_MOUSE Creatine kinase U-type, mitochondrial OS=Mus musculus OX=10090 GN=Ckmt1 PE=1 SV=1
old/young	0.551	0.161419	0.792045	406.29	0.667	3	1	unresolved	P26048;P26049;P62812	P26048|GBRA2_MOUSE Gamma-aminobutyric acid receptor subunit alpha-2 OS=Mus musculus OX=10090 GN=Gabra2 PE=1 SV=1
old/young	0.416	0.161919	0.790702	407.55	0.667	3	2	inferred	Q8BS95	Q8BS95|GPHR_MOUSE Golgi pH regulator OS=Mus musculus OX=10090 GN=Gpr89a PE=1 SV=2
old/young	0.607	0.161919	0.790702	407.55	0.668	3	1	inferred	Q5HZI9	Q5HZI9|S2551_MOUSE Solute carrier family 25 member 51 OS=Mus musculus OX=10090 GN=Slc25a51 PE=1 SV=1
old/young	-0.273	0.162919	0.788029	410.07	0.668	3	13	inferred	P06745	P06745|G6PI_MOUSE Glucose-6-phosphate isomerase OS=Mus musculus OX=10090 GN=Gpi PE=1 SV=4
old/young	0.395	0.164418	0.784051	413.84	0.673	3	3	inferred	P19783	P19783|COX41_MOUSE Cytochrome c oxidase subunit 4 isoform 1, mitochondrial OS=Mus musculus OX=10090 GN=Cox4i1 PE=1 SV=2
old/young	-1.222	0.16983	0.769985	427.46	0.673	1	1	inferred	Q91WE4	Q91WE4|CR032_MOUSE UPF0729 protein C18orf32 homolog OS=Mus musculus OX=10090 PE=3 SV=1
old/young	0.462	0.164835	0.78295	414.89	0.674	3	2	inferred	P63085	P63085|MK01_MOUSE Mitogen-activated protein kinase 1 OS=Mus musculus OX=10090 GN=Mapk1 PE=1 SV=3
old/young	0.56	0.168916	0.77233	425.16	0.674	3	1	unresolved	P05132;P68181	P05132|KAPCA_MOUSE cAMP-dependent protein kinase catalytic subunit alpha OS=Mus musculus OX=10090 GN=Prkaca PE=1 SV=3
old/young	0.256	0.16983	0.769985	427.46	0.674	3	12	inferred	Q03265	Q03265|ATPA_MOUSE ATP synthase subunit alpha, mitochondrial OS=Mus musculus OX=10090 GN=Atp5f1a PE=1 SV=1
old/young	0.242	0.170415	0.768493	428.93	0.674	3	12	inferred	Q91YX5	Q91YX5|LGAT1_MOUSE Acyl-CoA:lysophosphatidylglycerol acyltransferase 1 OS=Mus musculus OX=10090 GN=Lpgat1 PE=1 SV=1
old/young	-0.464	0.168831	0.772547	424.95	0.675	3	2	inferred	Q99MR8	Q99MR8|MCCA_MOUSE Methylcrotonoyl-CoA carboxylase subunit alpha, mitochondrial OS=Mus musculus OX=10090 GN=Mccc1 PE=1 SV=2
old/young	-1.154	0.16983	0.769985	427.46	0.675	1	1	inferred	Q7TNV1	Q7TNV1|FA57B_MOUSE Protein FAM57B OS=Mus musculus OX=10090 GN=Fam57b PE=2 SV=2
old/young	1.112	0.170915	0.767221	430.19	0.675	1	1	inferred	Q99N94	Q99N94|RM09_MOUSE 39S ribosomal protein L9, mitochondrial OS=Mus musculus OX=10090 GN=Mrpl9 PE=1 SV=2
old/young	-0.349	0.174825	0.757396	440.03	0.675	3	2	inferred	P11438	P11438|LAMP1_MOUSE Lysosome-associated membrane glycoprotein 1 OS=Mus musculus OX=10090 GN=Lamp1 PE=1 SV=2
old/young	-0.247	0.168831	0.772547	424.95	0.676	3	30	unresolved	P52480;P52480-2	P52480|KPYM_MOUSE Pyruvate kinase PKM OS=Mus musculus OX=10090 GN=Pkm PE=1 SV=4
old/young	0.424	0.16983	0.769985	427.46	0.676	3	2	inferred	O70589	O70589|CSKP_MOUSE Peripheral plasma membrane protein CASK OS=Mus musculus OX=10090 GN=Cask PE=1 SV=2
old/young	0.37	0.174825	0.757396	440.03	0.676	3	3	inferred	Q8R574	Q8R574|KPRB_MOUSE Phosphoribosyl pyrophosphate synthase-associated protein 2 OS=Mus musculus OX=10090 GN=Prpsap2 PE=1 SV=1
old/young	0.415	0.175824	0.754921	442.55	0.676	3	2	inferred	Q66GT5	Q66GT5|PTPM1_MOUSE Phosphatidylglycerophosphatase and protein-tyrosine phosphatase 1 OS=Mus musculus OX=10090 GN=Ptpmt1 PE=1 SV=1
old/young	0.29	0.176823	0.752461	445.06	0.676	3	6	inferred	Q80UU9	Q80UU9|PGRC2_MOUSE Membrane-associated progesterone receptor component 2 OS=Mus musculus OX=10090 GN=Pgrmc2 PE=1 SV=2
old/young	0.519	0.177822	0.750014	447.58	0.676	3	1	inferred	Q99N89	Q99N89|RM43_MOUSE 39S ribosomal protein L43, mitochondrial OS=Mus musculus OX=10090 GN=Mrpl43 PE=1 SV=1
old/young	0.371	0.166417	0.778803	418.87	0.677	3	3	inferred	Q5M8N0	Q5M8N0|CNRP1_MOUSE CB1 cannabinoid receptor-interacting protein 1 OS=Mus musculus OX=10090 GN=Cnrip1 PE=1 SV=1
old/young	-0.711	0.166833	0.777718	419.92	0.677	2	1	inferred	Q9JIF7	Q9JIF7|COPB_MOUSE Coatomer subunit beta OS=Mus musculus OX=10090 GN=Copb1 PE=1 SV=1
old/young	0.286	0.168831	0.772547	424.95	0.677	3	8	inferred	P62821	P62821|RAB1A_MOUSE Ras-related protein Rab-1A OS=Mus musculus OX=10090 GN=Rab1A PE=1 SV=3
old/young	0.455	0.173826	0.759885	437.52	0.677	3	2	unresolved	Q1RLL3;Q8JZW4	Q1RLL3|CPNE9_MOUSE Copine-9 OS=Mus musculus OX=10090 GN=Cpne9 PE=1 SV=1
old/young	-0.683	0.174825	0.757396	440.03	0.677	2	1	inferred	O08581	O08581|KCNK1_MOUSE Potassium channel subfamily K member 1 OS=Mus musculus OX=10090 GN=Kcnk1 PE=1 SV=2
old/young	0.416	0.175824	0.754921	442.55	0.677	3	3	inferred	Q8BK72	Q8BK72|RT27_MOUSE 28S ribosomal protein S27, mitochondrial OS=Mus musculus OX=10090 GN=Mrps27 PE=1 SV=2
old/young	0.456	0.176823	0.752461	445.06	0.677	3	2	inferred	Q3TAS6	Q3TAS6|EMC10_MOUSE ER membrane protein complex subunit 10 OS=Mus musculus OX=10090 GN=Emc10 PE=2 SV=2
old/young	0.432	0.177822	0.750014	447.58	0.677	3	2	inferred	P05532	P05532|KIT_MOUSE Mast/stem cell growth factor receptor Kit OS=Mus musculus OX=10090 GN=Kit PE=1 SV=3
old/young	0.509	0.166417	0.778803	418.87	0.678	3	1	inferred	Q9CQE3	Q9CQE3|RT17_MOUSE 28S ribosomal protein S17, mitochondrial OS=Mus musculus OX=10090 GN=Mrps17 PE=1 SV=1
old/young	0.283	0.167916	0.774908	422.64	0.678	3	6	inferred	P17047	P17047|LAMP2_MOUSE Lysosome-associated membrane glycoprotein 2 OS=Mus musculus OX=10090 GN=Lamp2 PE=1 SV=2
old/young	0.419	0.168831	0.772547	424.95	0.678	3	2	inferred	Q9R0N8	Q9R0N8|SYT6_MOUSE Synaptotagmin-6 OS=Mus musculus OX=10090 GN=Syt6 PE=1 SV=2
old/young	-0.281	0.171828	0.764906	432.49	0.678	3	8	unresolved	Q5SV64;Q61879;Q8VDD5	Q5SV64|Q5SV64_MOUSE Myosin-10 OS=Mus musculus OX=10090 GN=Myh10 PE=1 SV=1
old/young	0.584	0.173826	0.759885	437.52	0.678	3	1	inferred	Q9ERR1	Q9ERR1|NDEL1_MOUSE Nuclear distribution protein nudE-like 1 OS=Mus musculus OX=10090 GN=Ndel1 PE=1 SV=2
old/young	-0.619	0.174825	0.757396	440.03	0.678	2	1	inferred	Q8R307	Q8R307|VPS18_MOUSE Vacuolar protein sorting-associated protein 18 homolog OS=Mus musculus OX=10090 GN=Vps18 PE=1 SV=2
old/young	0.439	0.175824	0.754921	442.55	0.678	3	1	inferred	P39053	P39053|DYN1_MOUSE Dynamin-1 OS=Mus musculus OX=10090 GN=Dnm1 PE=1 SV=2
old/young	0.388	0.176823	0.752461	445.06	0.678	3	4	inferred	Q7TQD2	Q7TQD2|TPPP_MOUSE Tubulin polymerization-promoting protein OS=Mus musculus OX=10090 GN=Tppp PE=1 SV=1
old/young	-0.482	0.177822	0.750014	447.58	0.678	3	1	unresolved	Q3UV17;Q922U2	Q3UV17|K22O_MOUSE Keratin, type II cytoskeletal 2 oral OS=Mus musculus OX=10090 GN=Krt76 PE=1 SV=1
old/young	0.339	0.178821	0.747581	450.09	0.678	3	5	inferred	O55126	O55126|NIPS2_MOUSE Protein NipSnap homolog 2 OS=Mus musculus OX=10090 GN=Nipsnap2 PE=1 SV=1
old/young	0.511	0.17982	0.745162	452.61	0.678	3	1	inferred	P09542	P09542|MYL3_MOUSE Myosin light chain 3 OS=Mus musculus OX=10090 GN=Myl3 PE=1 SV=4
old/young	0.286	0.166417	0.778803	418.87	0.679	3	13	inferred	Q9D1K2	Q9D1K2|VATF_MOUSE V-type proton ATPase subunit F OS=Mus musculus OX=10090 GN=Atp6v1f PE=1 SV=2
old/young	0.46	0.167416	0.776202	421.39	0.679	3	1	inferred	Q9D3B1	Q9D3B1|HACD2_MOUSE Very-long-chain (3R)-3-hydroxyacyl-CoA dehydratase 2 OS=Mus musculus OX=10090 GN=Hacd2 PE=1 SV=1
old/young	0.338	0.167832	0.775125	422.43	0.679	3	3	inferred	O35114	O35114|SCRB2_MOUSE Lysosome membrane protein 2 OS=Mus musculus OX=10090 GN=Scarb2 PE=1 SV=3
old/young	0.31	0.168831	0.772547	424.95	0.679	3	6	inferred	Q9CYN9	Q9CYN9|RENR_MOUSE Renin receptor OS=Mus musculus OX=10090 GN=Atp6ap2 PE=1 SV=2
old/young	-0.42	0.173826	0.759885	437.52	0.679	3	5	inferred	Q64727	Q64727|VINC_MOUSE Vinculin OS=Mus musculus OX=10090 GN=Vcl PE=1 SV=4
old/young	-0.769	0.174825	0.757396	440.03	0.679	2	1	inferred	Q64337	Q64337|SQSTM_MOUSE Sequestosome-1 OS=Mus musculus OX=10090 GN=Sqstm1 PE=1 SV=1
old/young	0.296	0.177822	0.750014	447.58	0.679	3	5	inferred	Q8QZT1	Q8QZT1|THIL_MOUSE Acetyl-CoA acetyltransferase, mitochondrial OS=Mus musculus OX=10090 GN=Acat1 PE=1 SV=1
old/young	0.387	0.178821	0.747581	450.09	0.679	3	3	inferred	Q6AXF6	Q6AXF6|SIDT1_MOUSE SID1 transmembrane family member 1 OS=Mus musculus OX=10090 GN=Sidt1 PE=1 SV=1
old/young	-0.279	0.17941	0.746153	451.58	0.679	3	8	inferred	Q61753	Q61753|SERA_MOUSE D-3-phosphoglycerate dehydrogenase OS=Mus musculus OX=10090 GN=Phgdh PE=1 SV=3
old/young	0.516	0.17982	0.745162	452.61	0.679	3	1	inferred	rev_Q9R0C8	Q9R0C8|VAV3_MOUSE reversed Guanine nucleotide exchange factor VAV3 OS=Mus musculus OX=10090 GN=Vav3 PE=1 SV=2
old/young	0.443	0.180819	0.742756	455.12	0.679	3	1	unresolved	Q6PIC6;Q6PIE5;Q9WV27	Q6PIC6|AT1A3_MOUSE Sodium/potassium-transporting ATPase subunit alpha-3 OS=Mus musculus OX=10090 GN=Atp1a3 PE=1 SV=1
old/young	0.465	0.187812	0.726276	472.72	0.679	3	2	inferred	O89116	O89116|VTI1A_MOUSE Vesicle transport through interaction with t-SNAREs homolog 1A OS=Mus musculus OX=10090 GN=Vti1a PE=1 SV=1
old/young	-0.496	0.188811	0.723972	475.24	0.679	3	2	inferred	Q8R146	Q8R146|APEH_MOUSE Acylamino-acid-releasing enzyme OS=Mus musculus OX=10090 GN=Apeh PE=1 SV=3
old/young	0.338	0.168831	0.772547	424.95	0.68	3	3	inferred	Q9CQD1	Q9CQD1|RAB5A_MOUSE Ras-related protein Rab-5A OS=Mus musculus OX=10090 GN=Rab5a PE=1 SV=1
old/young	0.323	0.172827	0.762388	435.01	0.68	3	5	inferred	Q8R1V4	Q8R1V4|TMED4_MOUSE Transmembrane emp24 domain-containing protein 4 OS=Mus musculus OX=10090 GN=Tmed4 PE=1 SV=1
old/young	-0.279	0.173826	0.759885	437.52	0.68	3	14	inferred	P56695	P56695|WFS1_MOUSE Wolframin OS=Mus musculus OX=10090 GN=Wfs1 PE=1 SV=1
old/young	0.403	0.174825	0.757396	440.03	0.68	3	3	inferred	Q91WS0	Q91WS0|CISD1_MOUSE CDGSH iron-sulfur domain-containing protein 1 OS=Mus musculus OX=10090 GN=Cisd1 PE=1 SV=1
old/young	0.266	0.17982	0.745162	452.61	0.68	3	12	inferred	Q9Z2W9	Q9Z2W9|GRIA3_MOUSE Glutamate receptor 3 OS=Mus musculus OX=10090 GN=Gria3 PE=1 SV=2
old/young	-0.308	0.180819	0.742756	455.12	0.68	3	5	inferred	Q6A0A9	Q6A0A9|F120A_MOUSE Constitutive coactivator of PPAR-gamma-like protein 1 OS=Mus musculus OX=10090 GN=FAM120A PE=1 SV=2
old/young	0.291	0.187812	0.726276	472.72	0.68	3	5	inferred	P61922	P61922|GABT_MOUSE 4-aminobutyrate aminotransferase, mitochondrial OS=Mus musculus OX=10090 GN=Abat PE=1 SV=1
old/young	0.436	0.188811	0.723972	475.24	0.68	3	1	inferred	Q60749	Q60749|KHDR1_MOUSE KH domain-containing, RNA-binding, signal transduction-associated protein 1 OS=Mus musculus OX=10090 GN=Khdrbs1 PE=1 SV=2
old/young	0.315	0.194805	0.710399	490.32	0.68	3	4	inferred	F8WHN4	F8WHN4|F8WHN4_MOUSE Ral GTPase-activating protein subunit beta OS=Mus musculus OX=10090 GN=Ralgapb PE=1 SV=1
old/young	0.302	0.168831	0.772547	424.95	0.681	3	9	inferred	Q9DBS1	Q9DBS1|TMM43_MOUSE Transmembrane protein 43 OS=Mus musculus OX=10090 GN=Tmem43 PE=1 SV=1
old/young	0.613	0.172827	0.762388	435.01	0.681	2	1	inferred	Q8K440	Q8K440|ABC8B_MOUSE ATP-binding cassette sub-family A member 8-B OS=Mus musculus OX=10090 GN=Abca8b PE=1 SV=2
old/young	0.315	0.173826	0.759885	437.52	0.681	3	5	inferred	Q91YP0	Q91YP0|L2HDH_MOUSE L-2-hydroxyglutarate dehydrogenase, mitochondrial OS=Mus musculus OX=10090 GN=L2hgdh PE=1 SV=1
old/young	-0.211	0.186813	0.728592	470.21	0.681	3	37	inferred	G3X922	G3X922|G3X922_MOUSE DnaJ heat shock protein family (Hsp40) member C13 OS=Mus musculus OX=10090 GN=Dnajc13 PE=1 SV=1
old/young	0.465	0.187812	0.726276	472.72	0.681	3	1	inferred	P61148	P61148|FGF1_MOUSE Fibroblast growth factor 1 OS=Mus musculus OX=10090 GN=Fgf1 PE=1 SV=1
old/young	0.99	0.188811	0.723972	475.24	0.681	1	1	inferred	E9Q1V2	E9Q1V2|E9Q1V2_MOUSE Copine-5 (Fragment) OS=Mus musculus OX=10090 GN=Cpne5 PE=1 SV=1
old/young	0.437	0.190809	0.719401	480.27	0.681	3	3	inferred	Q7TPS5	Q7TPS5|C2CD5_MOUSE C2 domain-containing protein 5 OS=Mus musculus OX=10090 GN=C2cd5 PE=1 SV=2
old/young	0.401	0.193806	0.712632	487.81	0.681	3	2	inferred	Q99N16	Q99N16|CP4F3_MOUSE Leukotriene-B(4) omega-hydroxylase 2 OS=Mus musculus OX=10090 GN=Cyp4f3 PE=1 SV=2
old/young	0.433	0.194805	0.710399	490.32	0.681	3	1	inferred	Q5NCF2	Q5NCF2|TPPC1_MOUSE Trafficking protein particle complex subunit 1 OS=Mus musculus OX=10090 GN=Trappc1 PE=1 SV=1
old/young	0.412	0.181818	0.740363	457.64	0.682	3	2	inferred	Q9CQF0	Q9CQF0|RM11_MOUSE 39S ribosomal protein L11, mitochondrial OS=Mus musculus OX=10090 GN=Mrpl11 PE=1 SV=1
old/young	0.254	0.184815	0.733262	465.18	0.682	3	8	inferred	P62301	P62301|RS13_MOUSE 40S ribosomal protein S13 OS=Mus musculus OX=10090 GN=Rps13 PE=1 SV=2
old/young	-0.244	0.186813	0.728592	470.21	0.682	3	10	inferred	O89001	O89001|CBPD_MOUSE Carboxypeptidase D OS=Mus musculus OX=10090 GN=Cpd PE=1 SV=2
old/young	0.528	0.187812	0.726276	472.72	0.682	3	1	inferred	B2RY04	B2RY04|DOCK5_MOUSE Dedicator of cytokinesis protein 5 OS=Mus musculus OX=10090 GN=Dock5 PE=1 SV=2
old/young	-0.251	0.188811	0.723972	475.24	0.682	3	9	inferred	P27659	P27659|RL3_MOUSE 60S ribosomal protein L3 OS=Mus musculus OX=10090 GN=Rpl3 PE=1 SV=3
old/young	0.402	0.18981	0.72168	477.75	0.682	3	2	inferred	Q8CCB4	Q8CCB4|VPS53_MOUSE Vacuolar protein sorting-associated protein 53 homolog OS=Mus musculus OX=10090 GN=Vps53 PE=1 SV=1
old/young	0.439	0.190809	0.719401	480.27	0.682	2	3	inferred	Q0VBD0	Q0VBD0|Q0VBD0_MOUSE Integrin beta OS=Mus musculus OX=10090 GN=Itgb8 PE=1 SV=1
old/young	0.884	0.193806	0.712632	487.81	0.682	1	1	inferred	Q05CL8	Q05CL8|LARP7_MOUSE La-related protein 7 OS=Mus musculus OX=10090 GN=Larp7 PE=1 SV=2
old/young	-0.271	0.194805	0.710399	490.32	0.682	3	8	unresolved	E9Q035;Q921I1	E9Q035|E9Q035_MOUSE Predicted gene 20425 OS=Mus musculus OX=10090 GN=Gm20425 PE=4 SV=1
old/young	0.312	0.196803	0.705968	495.35	0.682	3	4	inferred	Q06335	Q06335|APLP2_MOUSE Amyloid-like protein 2 OS=Mus musculus OX=10090 GN=Aplp2 PE=1 SV=4
old/young	0.265	0.173826	0.759885	437.52	0.683	3	17	inferred	Q9CYH2	Q9CYH2|F213A_MOUSE Redox-regulatory protein FAM213A OS=Mus musculus OX=10090 GN=Fam213a PE=1 SV=2
old/young	0.575	0.183816	0.735616	462.67	0.683	3	1	inferred	P46662	P46662|MERL_MOUSE Merlin OS=Mus musculus OX=10090 GN=Nf2 PE=1 SV=2
old/young	0.362	0.184815	0.733262	465.18	0.683	3	3	inferred	P56395	P56395|CYB5_MOUSE Cytochrome b5 OS=Mus musculus OX=10090 GN=Cyb5a PE=1 SV=2
old/young	-0.579	0.185814	0.730921	467.69	0.683	2	1	inferred	Q8BW96	Q8BW96|KCC1D_MOUSE Calcium/calmodulin-dependent protein kinase type 1D OS=Mus musculus OX=10090 GN=Camk1d PE=1 SV=2
old/young	0.333	0.186813	0.728592	470.21	0.683	3	4	inferred	P62631	P62631|EF1A2_MOUSE Elongation factor 1-alpha 2 OS=Mus musculus OX=10090 GN=Eef1a2 PE=1 SV=1
old/young	-0.339	0.187812	0.726276	472.72	0.683	3	5	inferred	Q3UHK1	Q3UHK1|MYCT_MOUSE Proton myo-inositol cotransporter OS=Mus musculus OX=10090 GN=Slc2a13 PE=1 SV=2
old/young	0.389	0.190809	0.719401	480.27	0.683	3	2	inferred	P50153	P50153|GBG4_MOUSE Guanine nucleotide-binding protein G(I)/G(S)/G(O) subunit gamma-4 OS=Mus musculus OX=10090 GN=Gng4 PE=1 SV=1
old/young	0.434	0.191808	0.717133	482.78	0.683	3	2	inferred	Q9WTX5	Q9WTX5|SKP1_MOUSE S-phase kinase-associated protein 1 OS=Mus musculus OX=10090 GN=Skp1 PE=1 SV=3
old/young	-0.324	0.193806	0.712632	487.81	0.683	3	5	unresolved	Q6PIC6;Q6PIE5	Q6PIC6|AT1A3_MOUSE Sodium/potassium-transporting ATPase subunit alpha-3 OS=Mus musculus OX=10090 GN=Atp1a3 PE=1 SV=1
old/young	0.261	0.194805	0.710399	490.32	0.683	3	8	inferred	O70252	O70252|HMOX2_MOUSE Heme oxygenase 2 OS=Mus musculus OX=10090 GN=Hmox2 PE=1 SV=1
old/young	0.469	0.195804	0.708178	492.84	0.683	3	1	inferred	Q6P9R2	Q6P9R2|OXSR1_MOUSE Serine/threonine-protein kinase OSR1 OS=Mus musculus OX=10090 GN=Oxsr1 PE=1 SV=1
old/young	0.529	0.196803	0.705968	495.35	0.683	3	1	inferred	Q00612	Q00612|G6PD1_MOUSE Glucose-6-phosphate 1-dehydrogenase X OS=Mus musculus OX=10090 GN=G6pdx PE=1 SV=3
old/young	-0.222	0.182817	0.737983	460.15	0.684	3	25	inferred	V9GX76	V9GX76|V9GX76_MOUSE Unconventional myosin-VI OS=Mus musculus OX=10090 GN=Myo6 PE=1 SV=1
old/young	0.29	0.183816	0.735616	462.67	0.684	3	9	inferred	P48962	P48962|ADT1_MOUSE ADP/ATP translocase 1 OS=Mus musculus OX=10090 GN=Slc25a4 PE=1 SV=4
old/young	-0.395	0.184815	0.733262	465.18	0.684	3	2	inferred	G5E884	G5E884|G5E884_MOUSE Non-specific serine/threonine protein kinase OS=Mus musculus OX=10090 GN=Pak1 PE=1 SV=1
old/young	0.404	0.185814	0.730921	467.69	0.684	3	3	inferred	Q99K85	Q99K85|SERC_MOUSE Phosphoserine aminotransferase OS=Mus musculus OX=10090 GN=Psat1 PE=1 SV=1
old/young	0.503	0.186813	0.728592	470.21	0.684	3	1	inferred	Q80TB8	Q80TB8|VAT1L_MOUSE Synaptic vesicle membrane protein VAT-1 homolog-like OS=Mus musculus OX=10090 GN=Vat1l PE=1 SV=2
old/young	-0.248	0.187812	0.726276	472.72	0.684	3	13	inferred	Q9QUJ7	Q9QUJ7|ACSL4_MOUSE Long-chain-fatty-acid--CoA ligase 4 OS=Mus musculus OX=10090 GN=Acsl4 PE=1 SV=2
old/young	-0.381	0.190809	0.719401	480.27	0.684	3	3	inferred	Q8C1E7	Q8C1E7|T120A_MOUSE Transmembrane protein 120A OS=Mus musculus OX=10090 GN=Tmem120a PE=1 SV=1
old/young	0.606	0.191808	0.717133	482.78	0.684	2	1	inferred	Q3B7Z2	Q3B7Z2|OSBP1_MOUSE Oxysterol-binding protein 1 OS=Mus musculus OX=10090 GN=Osbp PE=1 SV=3
old/young	0.422	0.192807	0.714877	485.3	0.684	3	2	inferred	Q9CQE7	Q9CQE7|ERGI3_MOUSE Endoplasmic reticulum-Golgi intermediate compartment protein 3 OS=Mus musculus OX=10090 GN=Ergic3 PE=1 SV=1
old/young	0.325	0.192807	0.714877	485.3	0.684	3	5	inferred	Q99L04	Q99L04|DHRS1_MOUSE Dehydrogenase/reductase SDR family member 1 OS=Mus musculus OX=10090 GN=Dhrs1 PE=1 SV=1
old/young	0.235	0.193806	0.712632	487.81	0.684	3	11	inferred	Q8BXZ1	Q8BXZ1|TMX3_MOUSE Protein disulfide-isomerase TMX3 OS=Mus musculus OX=10090 GN=Tmx3 PE=1 SV=2
old/young	0.405	0.194805	0.710399	490.32	0.684	3	2	inferred	Q9QYI4	Q9QYI4|DJB12_MOUSE DnaJ homolog subfamily B member 12 OS=Mus musculus OX=10090 GN=Dnajb12 PE=1 SV=2
old/young	-0.408	0.196803	0.705968	495.35	0.684	3	3	inferred	Q8BW75	Q8BW75|AOFB_MOUSE Amine oxidase [flavin-containing] B OS=Mus musculus OX=10090 GN=Maob PE=1 SV=4
old/young	-0.316	0.198801	0.701581	500.38	0.684	3	3	inferred	P26043	P26043|RADI_MOUSE Radixin OS=Mus musculus OX=10090 GN=Rdx PE=1 SV=3
old/young	0.269	0.182817	0.737983	460.15	0.685	3	9	inferred	P62482	P62482|KCAB2_MOUSE Voltage-gated potassium channel subunit beta-2 OS=Mus musculus OX=10090 GN=Kcnab2 PE=1 SV=1
old/young	0.454	0.183816	0.735616	462.67	0.685	3	1	inferred	Q8K406	Q8K406|LGI3_MOUSE Leucine-rich repeat LGI family member 3 OS=Mus musculus OX=10090 GN=Lgi3 PE=1 SV=1
old/young	0.35	0.184815	0.733262	465.18	0.685	3	3	inferred	P61804	P61804|DAD1_MOUSE Dolichyl-diphosphooligosaccharide--protein glycosyltransferase subunit DAD1 OS=Mus musculus OX=10090 GN=Dad1 PE=1 SV=3
old/young	0.359	0.185814	0.730921	467.69	0.685	3	3	inferred	P0DP26	P0DP26|CALM1_MOUSE Calmodulin-1 OS=Mus musculus OX=10090 GN=Calm1 PE=1 SV=1
old/young	0.373	0.186813	0.728592	470.21	0.685	3	3	inferred	Q8R2Y8	Q8R2Y8|PTH2_MOUSE Peptidyl-tRNA hydrolase 2, mitochondrial OS=Mus musculus OX=10090 GN=Ptrh2 PE=1 SV=1
old/young	0.357	0.192807	0.714877	485.3	0.685	3	2	inferred	A0A0R4J0B5	A0A0R4J0B5|A0A0R4J0B5_MOUSE cDNA sequence BC017158 OS=Mus musculus OX=10090 GN=BC017158 PE=1 SV=1
old/young	0.675	0.193806	0.712632	487.81	0.685	2	1	inferred	Q9Z0N2	Q9Z0N2|IF2H_MOUSE Eukaryotic translation initiation factor 2 subunit 3, Y-linked OS=Mus musculus OX=10090 GN=Eif2s3y PE=1 SV=2
old/young	0.476	0.196803	0.705968	495.35	0.685	3	1	unresolved	O08709;Q8BG37	O08709|PRDX6_MOUSE Peroxiredoxin-6 OS=Mus musculus OX=10090 GN=Prdx6 PE=1 SV=3
old/young	0.536	0.197802	0.703769	497.87	0.685	3	1	inferred	Q6PB66	Q6PB66|LPPRC_MOUSE Leucine-rich PPR motif-containing protein, mitochondrial OS=Mus musculus OX=10090 GN=Lrpprc PE=1 SV=2
old/young	-0.59	0.198801	0.701581	500.38	0.685	2	1	inferred	Q9DBL1	Q9DBL1|ACDSB_MOUSE Short/branched chain specific acyl-CoA dehydrogenase, mitochondrial OS=Mus musculus OX=10090 GN=Acadsb PE=1 SV=1
old/young	0.414	0.198801	0.701581	500.38	0.685	3	2	inferred	Q9WV54	Q9WV54|ASAH1_MOUSE Acid ceramidase OS=Mus musculus OX=10090 GN=Asah1 PE=1 SV=1
old/young	0.677	0.1998	0.699404	502.9	0.685	2	1	inferred	P62748	P62748|HPCL1_MOUSE Hippocalcin-like protein 1 OS=Mus musculus OX=10090 GN=Hpcal1 PE=1 SV=2
old/young	0.426	0.183816	0.735616	462.67	0.686	2	3	inferred	S4R1E7	S4R1E7|S4R1E7_MOUSE BAI1-associated protein 3 OS=Mus musculus OX=10090 GN=Baiap3 PE=1 SV=1
old/young	-0.299	0.184815	0.733262	465.18	0.686	3	4	inferred	Q9QYJ0	Q9QYJ0|DNJA2_MOUSE DnaJ homolog subfamily A member 2 OS=Mus musculus OX=10090 GN=Dnaja2 PE=1 SV=1
old/young	0.253	0.193806	0.712632	487.81	0.686	3	15	inferred	O08917	O08917|FLOT1_MOUSE Flotillin-1 OS=Mus musculus OX=10090 GN=Flot1 PE=1 SV=1
old/young	-0.24	0.198801	0.701581	500.38	0.686	3	17	inferred	O08914	O08914|FAAH1_MOUSE Fatty-acid amide hydrolase 1 OS=Mus musculus OX=10090 GN=Faah PE=1 SV=1
old/young	-0.389	0.1998	0.699404	502.9	0.686	3	2	inferred	O35098	O35098|DPYL4_MOUSE Dihydropyrimidinase-related protein 4 OS=Mus musculus OX=10090 GN=Dpysl4 PE=1 SV=1
old/young	0.331	0.206793	0.684464	520.5	0.686	3	3	inferred	O70572	O70572|NSMA_MOUSE Sphingomyelin phosphodiesterase 2 OS=Mus musculus OX=10090 GN=Smpd2 PE=1 SV=1
old/young	0.246	0.198801	0.701581	500.38	0.687	3	12	inferred	P62270	P62270|RS18_MOUSE 40S ribosomal protein S18 OS=Mus musculus OX=10090 GN=Rps18 PE=1 SV=3
old/young	1.066	0.200799	0.697238	505.41	0.687	1	1	inferred	A2AFS3	A2AFS3|K1324_MOUSE UPF0577 protein KIAA1324 OS=Mus musculus OX=10090 GN=Kiaa1324 PE=1 SV=1
old/young	0.266	0.201798	0.695083	507.93	0.687	3	10	inferred	Q69ZF3	Q69ZF3|GBA2_MOUSE Non-lysosomal glucosylceramidase OS=Mus musculus OX=10090 GN=Gba2 PE=1 SV=2
old/young	0.226	0.204795	0.68868	515.47	0.687	3	21	inferred	Q8C7X2	Q8C7X2|EMC1_MOUSE ER membrane protein complex subunit 1 OS=Mus musculus OX=10090 GN=Emc1 PE=1 SV=1
old/young	0.425	0.206793	0.684464	520.5	0.687	3	1	unresolved	Q01065;Q8BRR9	Q01065|PDE1B_MOUSE Calcium/calmodulin-dependent 3',5'-cyclic nucleotide phosphodiesterase 1B OS=Mus musculus OX=10090 GN=Pde1b PE=1 SV=2
old/young	0.318	0.200799	0.697238	505.41	0.688	3	4	inferred	Q9CR60	Q9CR60|GOT1B_MOUSE Vesicle transport protein GOT1B OS=Mus musculus OX=10090 GN=Golt1b PE=1 SV=1
old/young	-0.458	0.201798	0.695083	507.93	0.688	3	1	inferred	Q9JHU9	Q9JHU9|INO1_MOUSE Inositol-3-phosphate synthase 1 OS=Mus musculus OX=10090 GN=Isyna1 PE=1 SV=1
old/young	0.389	0.202797	0.692938	510.44	0.688	3	2	inferred	Q62132	Q62132|PTPRR_MOUSE Receptor-type tyrosine-protein phosphatase R OS=Mus musculus OX=10090 GN=Ptprr PE=1 SV=1
old/young	-0.315	0.203796	0.690804	512.96	0.688	3	6	inferred	P97370	P97370|AT1B3_MOUSE Sodium/potassium-transporting ATPase subunit beta-3 OS=Mus musculus OX=10090 GN=Atp1b3 PE=1 SV=1
old/young	0.319	0.204795	0.68868	515.47	0.688	3	3	inferred	Q99J47	Q99J47|DRS7B_MOUSE Dehydrogenase/reductase SDR family member 7B OS=Mus musculus OX=10090 GN=Dhrs7b PE=1 SV=1
old/young	0.296	0.205794	0.686567	517.98	0.688	3	6	inferred	Q80X80	Q80X80|C2C2L_MOUSE Phospholipid transfer protein C2CD2L OS=Mus musculus OX=10090 GN=C2cd2l PE=1 SV=3
old/young	0.455	0.206793	0.684464	520.5	0.688	3	2	inferred	P20917-2	P20917-2|MAG_MOUSE Isoform S-MAG of Myelin-associated glycoprotein OS=Mus musculus OX=10090 GN=Mag
old/young	-0.419	0.206793	0.684464	520.5	0.688	3	1	unresolved	Q8K0U4;Q9CZJ2	Q8K0U4|HS12A_MOUSE Heat shock 70 kDa protein 12A OS=Mus musculus OX=10090 GN=Hspa12a PE=1 SV=1
old/young	0.455	0.207792	0.682371	523.01	0.688	3	1	inferred	Q8BTY2	Q8BTY2|S4A7_MOUSE Sodium bicarbonate cotransporter 3 OS=Mus musculus OX=10090 GN=Slc4a7 PE=1 SV=2
old/young	0.308	0.201798	0.695083	507.93	0.689	3	5	inferred	P21447	P21447|MDR1A_MOUSE Multidrug resistance protein 1A OS=Mus musculus OX=10090 GN=Abcb1a PE=1 SV=3
old/young	0.537	0.202797	0.692938	510.44	0.689	3	2	inferred	Q7TMF3	Q7TMF3|NDUAC_MOUSE NADH dehydrogenase [ubiquinone] 1 alpha subcomplex subunit 12 OS=Mus musculus OX=10090 GN=Ndufa12 PE=1 SV=2
old/young	0.395	0.203796	0.690804	512.96	0.689	3	2	inferred	Q99P72-1	Q99P72-1|RTN4_MOUSE Isoform 3 of Reticulon-4 OS=Mus musculus OX=10090 GN=Rtn4
old/young	-0.368	0.203796	0.690804	512.96	0.689	3	3	inferred	P97447	P97447|FHL1_MOUSE Four and a half LIM domains protein 1 OS=Mus musculus OX=10090 GN=Fhl1 PE=1 SV=3
old/young	0.332	0.204795	0.68868	515.47	0.689	3	2	inferred	Q3TMP8	Q3TMP8|TM38A_MOUSE Trimeric intracellular cation channel type A OS=Mus musculus OX=10090 GN=Tmem38a PE=1 SV=2
old/young	-0.211	0.205794	0.686567	517.98	0.689	3	23	inferred	A2AN08	A2AN08|UBR4_MOUSE E3 ubiquitin-protein ligase UBR4 OS=Mus musculus OX=10090 GN=Ubr4 PE=1 SV=1
old/young	-0.211	0.206793	0.684464	520.5	0.689	3	38	unresolved	O08599;O08599-2	O08599|STXB1_MOUSE Syntaxin-binding protein 1 OS=Mus musculus OX=10090 GN=Stxbp1 PE=1 SV=2
old/young	-0.394	0.202797	0.692938	510.44	0.69	3	3	inferred	Q3U0M1	Q3U0M1|TPPC9_MOUSE Trafficking protein particle complex subunit 9 OS=Mus musculus OX=10090 GN=Trappc9 PE=1 SV=2
old/young	-0.4	0.203796	0.690804	512.96	0.69	3	2	inferred	Q8CHG5	Q8CHG5|AREL1_MOUSE Apoptosis-resistant E3 ubiquitin protein ligase 1 OS=Mus musculus OX=10090 GN=Arel1 PE=2 SV=2
old/young	0.324	0.204795	0.68868	515.47	0.69	3	3	inferred	Q9D8V0	Q9D8V0|HM13_MOUSE Minor histocompatibility antigen H13 OS=Mus musculus OX=10090 GN=Hm13 PE=1 SV=1
old/young	0.392	0.205794	0.686567	517.98	0.69	3	2	inferred	Q9CPS6	Q9CPS6|HINT3_MOUSE Histidine triad nucleotide-binding protein 3 OS=Mus musculus OX=10090 GN=Hint3 PE=1 SV=1
old/young	0.426	0.206793	0.684464	520.5	0.69	3	1	inferred	P21836	P21836|ACES_MOUSE Acetylcholinesterase OS=Mus musculus OX=10090 GN=Ache PE=1 SV=1
old/young	-0.235	0.208791	0.680288	525.53	0.69	3	18	inferred	P14094	P14094|AT1B1_MOUSE Sodium/potassium-transporting ATPase subunit beta-1 OS=Mus musculus OX=10090 GN=Atp1b1 PE=1 SV=1
old/young	0.407	0.208791	0.680288	525.53	0.691	3	1	inferred	O35449	O35449|PRRT1_MOUSE Proline-rich transmembrane protein 1 OS=Mus musculus OX=10090 GN=Prrt1 PE=1 SV=1
old/young	0.329	0.20979	0.678215	528.04	0.691	3	5	inferred	Q8CHT1	Q8CHT1|NGEF_MOUSE Ephexin-1 OS=Mus musculus OX=10090 GN=Ngef PE=1 SV=1
old/young	0.303	0.20979	0.678215	528.04	0.692	3	7	unresolved	Q9ES97;Q9ES97-3	Q9ES97|RTN3_MOUSE Reticulon-3 OS=Mus musculus OX=10090 GN=Rtn3 PE=1 SV=2
old/young	0.446	0.21978	0.658011	553.19	0.692	3	1	inferred	P05132	P05132|KAPCA_MOUSE cAMP-dependent protein kinase catalytic subunit alpha OS=Mus musculus OX=10090 GN=Prkaca PE=1 SV=3
old/young	0.312	0.223776	0.650186	563.24	0.692	3	4	inferred	P35279	P35279|RAB6A_MOUSE Ras-related protein Rab-6A OS=Mus musculus OX=10090 GN=Rab6a PE=1 SV=4
old/young	0.335	0.218781	0.65999	550.67	0.693	3	4	inferred	Q9DBZ5	Q9DBZ5|EIF3K_MOUSE Eukaryotic translation initiation factor 3 subunit K OS=Mus musculus OX=10090 GN=Eif3k PE=1 SV=1
old/young	0.405	0.21978	0.658011	553.19	0.693	3	1	inferred	A0A1W2P772	A0A1W2P772|A0A1W2P772_MOUSE Plasma membrane calcium-transporting ATPase 1 (Fragment) OS=Mus musculus OX=10090 GN=Atp2b1 PE=1 SV=1
old/young	0.32	0.221778	0.654081	558.22	0.693	3	3	inferred	P61211	P61211|ARL1_MOUSE ADP-ribosylation factor-like protein 1 OS=Mus musculus OX=10090 GN=Arl1 PE=1 SV=1
old/young	0.433	0.222777	0.652129	560.73	0.693	3	1	inferred	Q9EQT3	Q9EQT3|RHOU_MOUSE Rho-related GTP-binding protein RhoU OS=Mus musculus OX=10090 GN=Rhou PE=2 SV=1
old/young	0.404	0.223776	0.650186	563.24	0.693	3	1	inferred	Q8BWP8	Q8BWP8|B4GA1_MOUSE Beta-1,4-glucuronyltransferase 1 OS=Mus musculus OX=10090 GN=B4gat1 PE=1 SV=1
old/young	0.35	0.227772	0.642499	573.3	0.693	3	4	inferred	Q9D6R2	Q9D6R2|IDH3A_MOUSE Isocitrate dehydrogenase [NAD] subunit alpha, mitochondrial OS=Mus musculus OX=10090 GN=Idh3a PE=1 SV=1
old/young	0.296	0.210789	0.676152	530.56	0.694	3	4	inferred	Q3U487	Q3U487|HECD3_MOUSE E3 ubiquitin-protein ligase HECTD3 OS=Mus musculus OX=10090 GN=Hectd3 PE=1 SV=2
old/young	-0.233	0.214785	0.667996	540.61	0.694	3	21	inferred	Q9Z140	Q9Z140|CPNE6_MOUSE Copine-6 OS=Mus musculus OX=10090 GN=Cpne6 PE=1 SV=1
old/young	-0.304	0.218781	0.65999	550.67	0.694	3	4	inferred	Q9QZE5	Q9QZE5|COPG1_MOUSE Coatomer subunit gamma-1 OS=Mus musculus OX=10090 GN=Copg1 PE=1 SV=1
old/young	-0.299	0.218781	0.65999	550.67	0.694	3	4	inferred	Q61699	Q61699|HS105_MOUSE Heat shock protein 105 kDa OS=Mus musculus OX=10090 GN=Hsph1 PE=1 SV=2
old/young	0.405	0.21978	0.658011	553.19	0.694	3	3	inferred	Q6DFW0	Q6DFW0|CI072_MOUSE Guanine nucleotide exchange C9orf72 homolog OS=Mus musculus OX=10090 PE=1 SV=2
old/young	0.346	0.220779	0.656042	555.7	0.694	3	2	inferred	P62835	P62835|RAP1A_MOUSE Ras-related protein Rap-1A OS=Mus musculus OX=10090 GN=Rap1a PE=1 SV=1
old/young	0.375	0.221778	0.654081	558.22	0.694	3	2	inferred	Q69ZQ1	Q69ZQ1|MYORG_MOUSE Myogenesis-regulating glycosidase OS=Mus musculus OX=10090 GN=Myorg PE=1 SV=2
old/young	-0.301	0.222777	0.652129	560.73	0.694	3	5	inferred	Q9CZ13	Q9CZ13|QCR1_MOUSE Cytochrome b-c1 complex subunit 1, mitochondrial OS=Mus musculus OX=10090 GN=Uqcrc1 PE=1 SV=2
old/young	0.393	0.223776	0.650186	563.24	0.694	3	2	inferred	Q69ZK9	Q69ZK9|NLGN2_MOUSE Neuroligin-2 OS=Mus musculus OX=10090 GN=Nlgn2 PE=1 SV=2
old/young	0.45	0.224775	0.648252	565.76	0.694	3	1	unresolved	G5E863;P23818;Q7TNB5;Q9Z2W9	G5E863|G5E863_MOUSE Glutamate receptor 4 OS=Mus musculus OX=10090 GN=Gria4 PE=1 SV=1
old/young	0.427	0.226773	0.644408	570.79	0.694	2	2	inferred	Q8C172	Q8C172|CERS6_MOUSE Ceramide synthase 6 OS=Mus musculus OX=10090 GN=Cers6 PE=1 SV=1
old/young	-0.449	0.227772	0.642499	573.3	0.694	3	1	inferred	Q8CGY8	Q8CGY8|OGT1_MOUSE UDP-N-acetylglucosamine--peptide N-acetylglucosaminyltransferase 110 kDa subunit OS=Mus musculus OX=10090 GN=Ogt PE=1 SV=2
old/young	0.413	0.228771	0.640599	575.82	0.694	3	1	inferred	Q9R0N3	Q9R0N3|SYT11_MOUSE Synaptotagmin-11 OS=Mus musculus OX=10090 GN=Syt11 PE=1 SV=2
old/young	-0.58	0.211788	0.674098	533.07	0.695	2	1	inferred	Q9QYY8	Q9QYY8|SPAST_MOUSE Spastin OS=Mus musculus OX=10090 GN=Spast PE=1 SV=3
old/young	-0.299	0.213786	0.67002	538.1	0.695	3	4	unresolved	P68372;P99024;Q9D6F9	P68372|TBB4B_MOUSE Tubulin beta-4B chain OS=Mus musculus OX=10090 GN=Tubb4b PE=1 SV=1
old/young	0.576	0.214785	0.667996	540.61	0.695	2	1	inferred	Q9JJZ4	Q9JJZ4|UB2J1_MOUSE Ubiquitin-conjugating enzyme E2 J1 OS=Mus musculus OX=10090 GN=Ube2j1 PE=1 SV=2
old/young	0.533	0.215784	0.66598	543.13	0.695	3	1	inferred	P47791	P47791|GSHR_MOUSE Glutathione reductase, mitochondrial OS=Mus musculus OX=10090 GN=Gsr PE=1 SV=3
old/young	0.474	0.215784	0.66598	543.13	0.695	3	1	inferred	Q8CF60	Q8CF60|Q8CF60_MOUSE Zinc finger protein 263 OS=Mus musculus OX=10090 GN=Zfp263 PE=1 SV=1
old/young	0.292	0.217782	0.661978	548.16	0.695	3	4	inferred	O35454	O35454|CLCN6_MOUSE Chloride transport protein 6 OS=Mus musculus OX=10090 GN=Clcn6 PE=1 SV=1
old/young	0.36	0.218781	0.65999	550.67	0.695	3	2	inferred	Q8VEH8	Q8VEH8|ERLEC_MOUSE Endoplasmic reticulum lectin 1 OS=Mus musculus OX=10090 GN=Erlec1 PE=1 SV=1
old/young	0.675	0.21978	0.658011	553.19	0.695	2	1	inferred	P12961	P12961|7B2_MOUSE Neuroendocrine protein 7B2 OS=Mus musculus OX=10090 GN=Scg5 PE=1 SV=1
old/young	0.51	0.220779	0.656042	555.7	0.695	3	1	inferred	O88839	O88839|ADA15_MOUSE Disintegrin and metalloproteinase domain-containing protein 15 OS=Mus musculus OX=10090 GN=Adam15 PE=1 SV=2
old/young	-0.218	0.221778	0.654081	558.22	0.695	3	28	inferred	Q91WC3	Q91WC3|ACSL6_MOUSE Long-chain-fatty-acid--CoA ligase 6 OS=Mus musculus OX=10090 GN=Acsl6 PE=1 SV=1
old/young	0.491	0.222777	0.652129	560.73	0.695	3	1	inferred	Q9CYS6	Q9CYS6|CB072_MOUSE Uncharacterized protein C2orf72 homolog OS=Mus musculus OX=10090 PE=1 SV=2
old/young	0.47	0.223776	0.650186	563.24	0.695	3	1	inferred	Q8R480	Q8R480|NUP85_MOUSE Nuclear pore complex protein Nup85 OS=Mus musculus OX=10090 GN=Nup85 PE=1 SV=1
old/young	0.279	0.223776	0.650186	563.24	0.695	3	6	inferred	Q9JKY7	Q9JKY7|Q9JKY7_MOUSE Cytochrome P450 CYP2D22 OS=Mus musculus OX=10090 GN=Cyp2d22 PE=1 SV=1
old/young	0.255	0.225774	0.646326	568.27	0.695	3	6	inferred	Q3TEA8	Q3TEA8|HP1B3_MOUSE Heterochromatin protein 1-binding protein 3 OS=Mus musculus OX=10090 GN=Hp1bp3 PE=1 SV=1
old/young	0.415	0.226773	0.644408	570.79	0.695	3	1	inferred	Q9CY50	Q9CY50|SSRA_MOUSE Translocon-associated protein subunit alpha OS=Mus musculus OX=10090 GN=Ssr1 PE=1 SV=1
old/young	0.412	0.227772	0.642499	573.3	0.695	3	1	inferred	P70349	P70349|HINT1_MOUSE Histidine triad nucleotide-binding protein 1 OS=Mus musculus OX=10090 GN=Hint1 PE=1 SV=3
old/young	0.589	0.228771	0.640599	575.82	0.695	2	1	inferred	Q4VAE3	Q4VAE3|TMM65_MOUSE Transmembrane protein 65 OS=Mus musculus OX=10090 GN=Tmem65 PE=1 SV=1
old/young	0.488	0.228771	0.640599	575.82	0.695	3	1	inferred	Q05512	Q05512|MARK2_MOUSE Serine/threonine-protein kinase MARK2 OS=Mus musculus OX=10090 GN=Mark2 PE=1 SV=3
old/young	0.379	0.22977	0.638706	578.33	0.695	3	3	inferred	Q99JW1	Q99JW1|AB17A_MOUSE Alpha/beta hydrolase domain-containing protein 17A OS=Mus musculus OX=10090 GN=Abhd17a PE=1 SV=1
old/young	0.642	0.211788	0.674098	533.07	0.696	2	1	inferred	Q9D6K5	Q9D6K5|SYJ2B_MOUSE Synaptojanin-2-binding protein OS=Mus musculus OX=10090 GN=Synj2bp PE=1 SV=1
old/young	-0.712	0.212787	0.672054	535.59	0.696	2	1	inferred	Q148R4	Q148R4|Q148R4_MOUSE Serine peptidase inhibitor, Kazal type 5 OS=Mus musculus OX=10090 GN=Spink5 PE=1 SV=1
old/young	0.397	0.212787	0.672054	535.59	0.696	3	1	unresolved	Q60605;Q8CI43	Q60605|MYL6_MOUSE Myosin light polypeptide 6 OS=Mus musculus OX=10090 GN=Myl6 PE=1 SV=3
old/young	-0.24	0.213786	0.67002	538.1	0.696	3	11	inferred	P47911	P47911|RL6_MOUSE 60S ribosomal protein L6 OS=Mus musculus OX=10090 GN=Rpl6 PE=1 SV=3
old/young	0.373	0.214785	0.667996	540.61	0.696	3	2	inferred	P40240	P40240|CD9_MOUSE CD9 antigen OS=Mus musculus OX=10090 GN=Cd9 PE=1 SV=2
old/young	0.285	0.215784	0.66598	543.13	0.696	3	5	inferred	Q99KI3	Q99KI3|EMC3_MOUSE ER membrane protein complex subunit 3 OS=Mus musculus OX=10090 GN=Emc3 PE=1 SV=3
old/young	0.496	0.217782	0.661978	548.16	0.696	3	2	inferred	Q9D4V0	Q9D4V0|EKI1_MOUSE Ethanolamine kinase 1 OS=Mus musculus OX=10090 GN=Etnk1 PE=1 SV=2
old/young	0.219	0.218781	0.65999	550.67	0.696	3	14	inferred	Q9EQH3	Q9EQH3|VPS35_MOUSE Vacuolar protein sorting-associated protein 35 OS=Mus musculus OX=10090 GN=Vps35 PE=1 SV=1
old/young	0.409	0.221778	0.654081	558.22	0.696	3	2	inferred	P61329	P61329|FGF12_MOUSE Fibroblast growth factor 12 OS=Mus musculus OX=10090 GN=Fgf12 PE=1 SV=1
old/young	0.202	0.222777	0.652129	560.73	0.696	3	23	inferred	Q3UHL1	Q3UHL1|CAMKV_MOUSE CaM kinase-like vesicle-associated protein OS=Mus musculus OX=10090 GN=Camkv PE=1 SV=2
old/young	0.409	0.225774	0.646326	568.27	0.696	3	1	inferred	P28571	P28571|SC6A9_MOUSE Sodium- and chloride-dependent glycine transporter 1 OS=Mus musculus OX=10090 GN=Slc6a9 PE=1 SV=3
old/young	0.323	0.225774	0.646326	568.27	0.696	3	5	inferred	Q5DTY9	Q5DTY9|KCD16_MOUSE BTB/POZ domain-containing protein KCTD16 OS=Mus musculus OX=10090 GN=Kctd16 PE=1 SV=2
old/young	0.481	0.226773	0.644408	570.79	0.696	3	1	inferred	Q8CIB6	Q8CIB6|TM230_MOUSE Transmembrane protein 230 OS=Mus musculus OX=10090 GN=Tmem230 PE=1 SV=1
old/young	-0.26	0.227772	0.642499	573.3	0.696	3	6	unresolved	P68404-2;Q4VA93	P68404-2|KPCB_MOUSE Isoform Beta-II of Protein kinase C beta type OS=Mus musculus OX=10090 GN=Prkcb
old/young	0.302	0.22977	0.638706	578.33	0.696	3	4	inferred	Q9CQB5	Q9CQB5|CISD2_MOUSE CDGSH iron-sulfur domain-containing protein 2 OS=Mus musculus OX=10090 GN=Cisd2 PE=1 SV=1
old/young	0.282	0.230769	0.636822	580.85	0.696	3	4	unresolved	A0A0R4J0B5;Q91W34	A0A0R4J0B5|A0A0R4J0B5_MOUSE cDNA sequence BC017158 OS=Mus musculus OX=10090 GN=BC017158 PE=1 SV=1
old/young	0.247	0.231768	0.634946	583.36	0.696	3	10	inferred	O70443	O70443|GNAZ_MOUSE Guanine nucleotide-binding protein G(z) subunit alpha OS=Mus musculus OX=10090 GN=Gnaz PE=1 SV=4
old/young	0.239	0.212787	0.672054	535.59	0.697	3	11	inferred	Q99KW9	Q99KW9|TIP_MOUSE T-cell immunomodulatory protein OS=Mus musculus OX=10090 GN=Itfg1 PE=1 SV=2
old/young	0.437	0.213786	0.67002	538.1	0.697	3	1	inferred	P45376	P45376|ALDR_MOUSE Aldose reductase OS=Mus musculus OX=10090 GN=Akr1b1 PE=1 SV=3
old/young	-0.517	0.214785	0.667996	540.61	0.697	3	1	inferred	Q6NSQ9	Q6NSQ9|G6PC3_MOUSE Glucose-6-phosphatase 3 OS=Mus musculus OX=10090 GN=G6pc3 PE=1 SV=1
old/young	-0.47	0.217782	0.661978	548.16	0.697	3	1	unresolved	P62482;P63143	P62482|KCAB2_MOUSE Voltage-gated potassium channel subunit beta-2 OS=Mus musculus OX=10090 GN=Kcnab2 PE=1 SV=1
old/young	-0.317	0.217782	0.661978	548.16	0.697	3	2	unresolved	P29387;P62880	P29387|GBB4_MOUSE Guanine nucleotide-binding protein subunit beta-4 OS=Mus musculus OX=10090 GN=Gnb4 PE=1 SV=4
old/young	0.466	0.218781	0.65999	550.67	0.697	3	1	inferred	Q9QZS8	Q9QZS8|SH2D3_MOUSE SH2 domain-containing protein 3C OS=Mus musculus OX=10090 GN=Sh2d3c PE=1 SV=1
old/young	0.325	0.226773	0.644408	570.79	0.697	3	2	unresolved	P08556;Q61411	P08556|RASN_MOUSE GTPase NRas OS=Mus musculus OX=10090 GN=Nras PE=1 SV=1
old/young	0.311	0.227772	0.642499	573.3	0.697	3	5	inferred	Q60673	Q60673|PTPRN_MOUSE Receptor-type tyrosine-protein phosphatase-like N OS=Mus musculus OX=10090 GN=Ptprn PE=1 SV=2
old/young	0.212	0.230769	0.636822	580.85	0.697	3	15	inferred	P05063	P05063|ALDOC_MOUSE Fructose-bisphosphate aldolase C OS=Mus musculus OX=10090 GN=Aldoc PE=1 SV=4
old/young	0.339	0.231768	0.634946	583.36	0.697	3	2	inferred	P61089	P61089|UBE2N_MOUSE Ubiquitin-conjugating enzyme E2 N OS=Mus musculus OX=10090 GN=Ube2n PE=1 SV=1
old/young	-0.475	0.232767	0.633078	585.88	0.697	3	1	inferred	Q9WU78	Q9WU78|PDC6I_MOUSE Programmed cell death 6-interacting protein OS=Mus musculus OX=10090 GN=Pdcd6ip PE=1 SV=3
old/young	-0.579	0.23976	0.620223	603.48	0.697	1	2	inferred	Q8BWG8	Q8BWG8|ARRB1_MOUSE Beta-arrestin-1 OS=Mus musculus OX=10090 GN=Arrb1 PE=1 SV=1
old/young	0.405	0.213786	0.67002	538.1	0.698	3	1	inferred	Q8K358	Q8K358|PIGU_MOUSE Phosphatidylinositol glycan anchor biosynthesis class U protein OS=Mus musculus OX=10090 GN=Pigu PE=1 SV=4
old/young	1.063	0.214785	0.667996	540.61	0.698	1	1	inferred	Q5HZK2	Q5HZK2|NRSN2_MOUSE Neurensin-2 OS=Mus musculus OX=10090 GN=Nrsn2 PE=1 SV=1
old/young	-0.644	0.217782	0.661978	548.16	0.698	2	1	inferred	Q6P5B0	Q6P5B0|RRP12_MOUSE RRP12-like protein OS=Mus musculus OX=10090 GN=Rrp12 PE=1 SV=1
old/young	0.49	0.231768	0.634946	583.36	0.698	2	1	inferred	Q6ZWX6	Q6ZWX6|IF2A_MOUSE Eukaryotic translation initiation factor 2 subunit 1 OS=Mus musculus OX=10090 GN=Eif2s1 PE=1 SV=3
old/young	0.363	0.232767	0.633078	585.88	0.698	3	1	inferred	Q9D328	Q9D328|TM35A_MOUSE Transmembrane protein 35A OS=Mus musculus OX=10090 GN=Tmem35a PE=1 SV=1
old/young	0.649	0.23976	0.620223	603.48	0.698	2	1	inferred	Q921Z5	Q921Z5|TFIP8_MOUSE Tumor necrosis factor alpha-induced protein 8 OS=Mus musculus OX=10090 GN=Tnfaip8 PE=1 SV=1
old/young	0.291	0.23976	0.620223	603.48	0.698	3	3	inferred	Q3UYC0	Q3UYC0|PPM1H_MOUSE Protein phosphatase 1H OS=Mus musculus OX=10090 GN=Ppm1h PE=1 SV=1
old/young	0.315	0.240759	0.618417	605.99	0.698	3	3	inferred	Q8BHC4	Q8BHC4|DCAKD_MOUSE Dephospho-CoA kinase domain-containing protein OS=Mus musculus OX=10090 GN=Dcakd PE=1 SV=1
old/young	0.392	0.217782	0.661978	548.16	0.699	3	2	inferred	Q99JH7	Q99JH7|CSTN3_MOUSE Calsyntenin-3 OS=Mus musculus OX=10090 GN=Clstn3 PE=1 SV=1
old/young	0.213	0.231768	0.634946	583.36	0.699	3	16	inferred	Q8BLF1	Q8BLF1|NCEH1_MOUSE Neutral cholesterol ester hydrolase 1 OS=Mus musculus OX=10090 GN=Nceh1 PE=1 SV=1
old/young	-0.481	0.233766	0.631218	588.39	0.699	2	1	inferred	Q8CFV4	Q8CFV4|NRN1_MOUSE Neuritin OS=Mus musculus OX=10090 GN=Nrn1 PE=1 SV=1
old/young	-0.298	0.23976	0.620223	603.48	0.699	3	3	inferred	Q64237	Q64237|DOPO_MOUSE Dopamine beta-hydroxylase OS=Mus musculus OX=10090 GN=Dbh PE=1 SV=2
old/young	0.405	0.240759	0.618417	605.99	0.699	3	2	inferred	P12657	P12657|ACM1_MOUSE Muscarinic acetylcholine receptor M1 OS=Mus musculus OX=10090 GN=Chrm1 PE=1 SV=2
old/young	0.905	0.241758	0.616619	608.51	0.699	1	1	inferred	O55013	O55013|TPPC3_MOUSE Trafficking protein particle complex subunit 3 OS=Mus musculus OX=10090 GN=Trappc3 PE=1 SV=1
old/young	0.253	0.241758	0.616619	608.51	0.699	3	12	inferred	Q9CY27	Q9CY27|TECR_MOUSE Very-long-chain enoyl-CoA reductase OS=Mus musculus OX=10090 GN=Tecr PE=1 SV=1
old/young	0.412	0.217782	0.661978	548.16	0.7	3	2	inferred	P97952	P97952|SCN1B_MOUSE Sodium channel subunit beta-1 OS=Mus musculus OX=10090 GN=Scn1b PE=1 SV=1
old/young	0.298	0.233766	0.631218	588.39	0.7	3	4	inferred	Q80W54	Q80W54|FACE1_MOUSE CAAX prenyl protease 1 homolog OS=Mus musculus OX=10090 GN=Zmpste24 PE=1 SV=2
old/young	0.316	0.23976	0.620223	603.48	0.7	3	2	inferred	Q63912	Q63912|OMGP_MOUSE Oligodendrocyte-myelin glycoprotein OS=Mus musculus OX=10090 GN=Omg PE=1 SV=1
old/young	0.241	0.241758	0.616619	608.51	0.7	3	11	inferred	P24369	P24369|PPIB_MOUSE Peptidyl-prolyl cis-trans isomerase B OS=Mus musculus OX=10090 GN=Ppib PE=1 SV=2
old/young	0.274	0.234765	0.629366	590.9	0.701	3	5	inferred	Q61644	Q61644|PACN1_MOUSE Protein kinase C and casein kinase substrate in neurons protein 1 OS=Mus musculus OX=10090 GN=Pacsin1 PE=1 SV=1
old/young	0.364	0.238761	0.622036	600.96	0.701	3	2	unresolved	E9Q828;G5E829;Q0VF55	E9Q828|E9Q828_MOUSE Calcium-transporting ATPase OS=Mus musculus OX=10090 GN=Atp2b4 PE=1 SV=1
old/young	-0.516	0.23976	0.620223	603.48	0.701	2	1	inferred	Q80ZA4	Q80ZA4|PKHL1_MOUSE Fibrocystin-L OS=Mus musculus OX=10090 GN=Pkhd1l1 PE=1 SV=1
old/young	-0.439	0.242757	0.614828	611.02	0.701	3	1	inferred	A0A1L1SU40	A0A1L1SU40|A0A1L1SU40_MOUSE Choline transporter-like protein 2 (Fragment) OS=Mus musculus OX=10090 GN=Slc44a2 PE=1 SV=1
old/young	0.337	0.243756	0.613044	613.53	0.701	3	2	inferred	Q9CXY9	Q9CXY9|GPI8_MOUSE GPI-anchor transamidase OS=Mus musculus OX=10090 GN=Pigk PE=1 SV=2
old/young	-0.292	0.245754	0.609499	618.56	0.701	3	9	inferred	O54774	O54774|AP3D1_MOUSE AP-3 complex subunit delta-1 OS=Mus musculus OX=10090 GN=Ap3d1 PE=1 SV=1
old/young	0.618	0.237762	0.623857	598.45	0.702	2	1	inferred	Q9WUU7	Q9WUU7|CATZ_MOUSE Cathepsin Z OS=Mus musculus OX=10090 GN=Ctsz PE=1 SV=1
old/young	-0.229	0.237762	0.623857	598.45	0.702	3	10	inferred	Q8C7K6	Q8C7K6|PCYXL_MOUSE Prenylcysteine oxidase-like OS=Mus musculus OX=10090 GN=Pcyox1l PE=1 SV=1
old/young	1.476	0.238761	0.622036	600.96	0.702	3	1	unresolved	P63260;P68033;Q8BFZ3	P63260|ACTG_MOUSE Actin, cytoplasmic 2 OS=Mus musculus OX=10090 GN=Actg1 PE=1 SV=1
old/young	-0.268	0.23976	0.620223	603.48	0.702	3	5	inferred	Q9DBF1	Q9DBF1|AL7A1_MOUSE Alpha-aminoadipic semialdehyde dehydrogenase OS=Mus musculus OX=10090 GN=Aldh7a1 PE=1 SV=4
old/young	0.568	0.243756	0.613044	613.53	0.702	3	1	unresolved	Q69ZS6;Q8BG39	Q69ZS6|SV2C_MOUSE Synaptic vesicle glycoprotein 2C OS=Mus musculus OX=10090 GN=Sv2c PE=1 SV=2
old/young	0.454	0.244755	0.611268	616.05	0.702	3	1	inferred	O09111	O09111|NDUBB_MOUSE NADH dehydrogenase [ubiquinone] 1 beta subcomplex subunit 11, mitochondrial OS=Mus musculus OX=10090 GN=Ndufb11 PE=1 SV=2
old/young	0.346	0.244755	0.611268	616.05	0.702	3	2	inferred	Q9CZ04	Q9CZ04|CSN7A_MOUSE COP9 signalosome complex subunit 7a OS=Mus musculus OX=10090 GN=Cops7a PE=1 SV=2
old/young	0.377	0.245754	0.609499	618.56	0.702	3	2	inferred	Q9CZ30	Q9CZ30|OLA1_MOUSE Obg-like ATPase 1 OS=Mus musculus OX=10090 GN=Ola1 PE=1 SV=1
old/young	0.475	0.246753	0.607737	621.08	0.702	2	2	inferred	P70280	P70280|VAMP7_MOUSE Vesicle-associated membrane protein 7 OS=Mus musculus OX=10090 GN=Vamp7 PE=1 SV=1
old/young	0.314	0.235764	0.627522	593.42	0.703	3	2	unresolved	A0A0R4J2C2;P46096	A0A0R4J2C2|A0A0R4J2C2_MOUSE Synaptotagmin II OS=Mus musculus OX=10090 GN=Syt2 PE=1 SV=1
old/young	0.23	0.237762	0.623857	598.45	0.703	3	9	inferred	P56480	P56480|ATPB_MOUSE ATP synthase subunit beta, mitochondrial OS=Mus musculus OX=10090 GN=Atp5f1b PE=1 SV=2
old/young	0.263	0.238761	0.622036	600.96	0.703	3	6	inferred	Q9CXW4	Q9CXW4|RL11_MOUSE 60S ribosomal protein L11 OS=Mus musculus OX=10090 GN=Rpl11 PE=1 SV=4
old/young	0.371	0.23976	0.620223	603.48	0.703	3	1	inferred	Q9D8M3	Q9D8M3|HRG1_MOUSE Heme transporter HRG1 OS=Mus musculus OX=10090 GN=Slc48a1 PE=2 SV=1
old/young	0.233	0.23976	0.620223	603.48	0.703	3	11	inferred	P58252	P58252|EF2_MOUSE Elongation factor 2 OS=Mus musculus OX=10090 GN=Eef2 PE=1 SV=2
old/young	0.236	0.243756	0.613044	613.53	0.703	3	14	inferred	Q02819	Q02819|NUCB1_MOUSE Nucleobindin-1 OS=Mus musculus OX=10090 GN=Nucb1 PE=1 SV=2
old/young	0.653	0.244755	0.611268	616.05	0.703	2	1	inferred	Q91YW3	Q91YW3|DNJC3_MOUSE DnaJ homolog subfamily C member 3 OS=Mus musculus OX=10090 GN=Dnajc3 PE=1 SV=1
old/young	0.448	0.245754	0.609499	618.56	0.703	3	1	inferred	Q8K209	Q8K209|AGRG1_MOUSE Adhesion G-protein coupled receptor G1 OS=Mus musculus OX=10090 GN=Adgrg1 PE=1 SV=1
old/young	-0.636	0.246753	0.607737	621.08	0.703	2	1	inferred	H3BJD6	H3BJD6|H3BJD6_MOUSE Protein phosphatase 1, regulatory (inhibitor) subunit 9A OS=Mus musculus OX=10090 GN=Ppp1r9a PE=1 SV=1
old/young	-0.459	0.246753	0.607737	621.08	0.703	3	1	inferred	Q7TPV4	Q7TPV4|MBB1A_MOUSE Myb-binding protein 1A OS=Mus musculus OX=10090 GN=Mybbp1a PE=1 SV=2
old/young	0.26	0.247752	0.605982	623.59	0.703	3	6	inferred	Q9R1Q9	Q9R1Q9|VAS1_MOUSE V-type proton ATPase subunit S1 OS=Mus musculus OX=10090 GN=Atp6ap1 PE=1 SV=1
old/young	0.257	0.236763	0.625686	595.93	0.704	3	7	inferred	Q2TBE6	Q2TBE6|P4K2A_MOUSE Phosphatidylinositol 4-kinase type 2-alpha OS=Mus musculus OX=10090 GN=Pi4k2a PE=1 SV=1
old/young	-0.234	0.236763	0.625686	595.93	0.704	3	9	inferred	Q9CS84	Q9CS84|NRX1A_MOUSE Neurexin-1 OS=Mus musculus OX=10090 GN=Nrxn1 PE=1 SV=3
old/young	0.361	0.237762	0.623857	598.45	0.704	3	2	inferred	Q8CBW3	Q8CBW3|ABI1_MOUSE Abl interactor 1 OS=Mus musculus OX=10090 GN=Abi1 PE=1 SV=3
old/young	0.715	0.238761	0.622036	600.96	0.704	2	1	inferred	Q9DBT4	Q9DBT4|ENTP4_MOUSE Ectonucleoside triphosphate diphosphohydrolase 4 OS=Mus musculus OX=10090 GN=Entpd4 PE=1 SV=1
old/young	-1.063	0.245754	0.609499	618.56	0.704	1	1	inferred	Q3UPL0	Q3UPL0|SC31A_MOUSE Protein transport protein Sec31A OS=Mus musculus OX=10090 GN=Sec31a PE=1 SV=2
old/young	0.369	0.247752	0.605982	623.59	0.704	3	2	inferred	Q8JZZ7	Q8JZZ7|AGRL2_MOUSE Adhesion G protein-coupled receptor L2 OS=Mus musculus OX=10090 GN=Adgrl2 PE=1 SV=3
old/young	0.39	0.24975	0.602494	628.62	0.704	3	2	inferred	P54823	P54823|DDX6_MOUSE Probable ATP-dependent RNA helicase DDX6 OS=Mus musculus OX=10090 GN=Ddx6 PE=1 SV=1
old/young	0.346	0.250749	0.60076	631.14	0.704	3	2	inferred	Q61327	Q61327|SC6A3_MOUSE Sodium-dependent dopamine transporter OS=Mus musculus OX=10090 GN=Slc6a3 PE=1 SV=2
old/young	-0.242	0.251748	0.599034	633.65	0.704	3	7	inferred	P62830	P62830|RL23_MOUSE 60S ribosomal protein L23 OS=Mus musculus OX=10090 GN=Rpl23 PE=1 SV=1
old/young	0.618	0.253746	0.5956	638.68	0.704	2	1	inferred	Q8R035	Q8R035|ICT1_MOUSE Peptidyl-tRNA hydrolase ICT1, mitochondrial OS=Mus musculus OX=10090 GN=Mrpl58 PE=1 SV=1
old/young	0.364	0.254745	0.593894	641.19	0.704	3	1	inferred	A2AEM2	A2AEM2|A2AEM2_MOUSE Chloride channel CLIC-like 1, isoform CRA_a OS=Mus musculus OX=10090 GN=Clcc1 PE=1 SV=1
old/young	0.513	0.236763	0.625686	595.93	0.705	2	1	inferred	P62892	P62892|RL39_MOUSE 60S ribosomal protein L39 OS=Mus musculus OX=10090 GN=Rpl39 PE=1 SV=2
old/young	0.463	0.237762	0.623857	598.45	0.705	3	2	inferred	Q62192	Q62192|CD180_MOUSE CD180 antigen OS=Mus musculus OX=10090 GN=Cd180 PE=1 SV=2
old/young	0.271	0.248751	0.604235	626.11	0.705	3	6	inferred	Q8VEM8	Q8VEM8|MPCP_MOUSE Phosphate carrier protein, mitochondrial OS=Mus musculus OX=10090 GN=Slc25a3 PE=1 SV=1
old/young	0.396	0.24975	0.602494	628.62	0.705	3	2	inferred	Q9Z2B2	Q9Z2B2|UCP5_MOUSE Brain mitochondrial carrier protein 1 OS=Mus musculus OX=10090 GN=Slc25a14 PE=1 SV=2
old/young	0.206	0.250749	0.60076	631.14	0.705	3	21	unresolved	P18872;P18872-2	P18872|GNAO_MOUSE Guanine nucleotide-binding protein G(o) subunit alpha OS=Mus musculus OX=10090 GN=Gnao1 PE=1 SV=3
old/young	0.319	0.251748	0.599034	633.65	0.705	3	4	inferred	P41234	P41234|ABCA2_MOUSE ATP-binding cassette sub-family A member 2 OS=Mus musculus OX=10090 GN=Abca2 PE=1 SV=4
old/young	0.411	0.253746	0.5956	638.68	0.705	3	1	inferred	Q3UJB0	Q3UJB0|Q3UJB0_MOUSE Splicing factor 3b, subunit 2 OS=Mus musculus OX=10090 GN=Sf3b2 PE=1 SV=1
old/young	0.552	0.254745	0.593894	641.19	0.705	3	1	unresolved	Q8C1B7;Q9R1T4	Q8C1B7|SEP11_MOUSE Septin-11 OS=Mus musculus OX=10090 GN=Sept11 PE=1 SV=4
old/young	-0.323	0.254745	0.593894	641.19	0.705	3	3	inferred	Q8BGZ4	Q8BGZ4|CDC23_MOUSE Cell division cycle protein 23 homolog OS=Mus musculus OX=10090 GN=Cdc23 PE=1 SV=2
old/young	0.372	0.237762	0.623857	598.45	0.706	3	1	unresolved	P08556;P32883-2	P08556|RASN_MOUSE GTPase NRas OS=Mus musculus OX=10090 GN=Nras PE=1 SV=1
old/young	0.653	0.24975	0.602494	628.62	0.706	2	1	inferred	Q3UHD2	Q3UHD2|GFOD1_MOUSE Glucose-fructose oxidoreductase domain-containing protein 1 OS=Mus musculus OX=10090 GN=Gfod1 PE=1 SV=1
old/young	0.567	0.24975	0.602494	628.62	0.706	2	1	inferred	P52432	P52432|RPAC1_MOUSE DNA-directed RNA polymerases I and III subunit RPAC1 OS=Mus musculus OX=10090 GN=Polr1c PE=1 SV=3
old/young	0.299	0.250749	0.60076	631.14	0.706	3	4	inferred	P97807	P97807|FUMH_MOUSE Fumarate hydratase, mitochondrial OS=Mus musculus OX=10090 GN=Fh PE=1 SV=3
old/young	0.43	0.251748	0.599034	633.65	0.706	3	1	inferred	Q91ZB0	Q91ZB0|ALPK2_MOUSE Alpha-protein kinase 2 OS=Mus musculus OX=10090 GN=Alpk2 PE=2 SV=3
old/young	0.315	0.251748	0.599034	633.65	0.706	3	2	inferred	O08992	O08992|SDCB1_MOUSE Syntenin-1 OS=Mus musculus OX=10090 GN=Sdcbp PE=1 SV=1
old/young	0.33	0.252747	0.597314	636.16	0.706	3	2	inferred	Q8R1S0	Q8R1S0|COQ6_MOUSE Ubiquinone biosynthesis monooxygenase COQ6, mitochondrial OS=Mus musculus OX=10090 GN=Coq6 PE=1 SV=3
old/young	0.266	0.253746	0.5956	638.68	0.706	3	7	unresolved	Q8BH78;Q99P72;Q99P72-1	Q8BH78|Q8BH78_MOUSE Reticulon OS=Mus musculus OX=10090 GN=Rtn4 PE=1 SV=1
old/young	0.397	0.254745	0.593894	641.19	0.706	3	1	inferred	E0CYJ0	E0CYJ0|E0CYJ0_MOUSE MOB-like protein phocein (Fragment) OS=Mus musculus OX=10090 GN=Mob4 PE=1 SV=1
old/young	-0.482	0.24975	0.602494	628.62	0.707	3	1	inferred	Q8R4T9	Q8R4T9|UT2_MOUSE Urea transporter 2 OS=Mus musculus OX=10090 GN=Slc14a2 PE=1 SV=2
old/young	0.422	0.253746	0.5956	638.68	0.707	3	1	unresolved	P55258;P56371;P61027;P61028;P62821;P62823;P63011;Q6PHN9;Q8BHC1;Q91V41;Q91ZR1;Q923S9;Q9CZT8;Q9D1G1	P55258|RAB8A_MOUSE Ras-related protein Rab-8A OS=Mus musculus OX=10090 GN=Rab8a PE=1 SV=2
old/young	0.192	0.253746	0.5956	638.68	0.707	3	16	inferred	P47740	P47740|AL3A2_MOUSE Fatty aldehyde dehydrogenase OS=Mus musculus OX=10090 GN=Aldh3a2 PE=1 SV=2
old/young	0.366	0.256743	0.590501	646.22	0.707	3	1	unresolved	P12658;Q08331	P12658|CALB1_MOUSE Calbindin OS=Mus musculus OX=10090 GN=Calb1 PE=1 SV=2
old/young	-0.25	0.253746	0.5956	638.68	0.708	3	11	inferred	Q99JY9	Q99JY9|ARP3_MOUSE Actin-related protein 3 OS=Mus musculus OX=10090 GN=Actr3 PE=1 SV=3
old/young	-1.788	0.256743	0.590501	646.22	0.708	3	11	inferred	Q9QYS2	Q9QYS2|GRM3_MOUSE Metabotropic glutamate receptor 3 OS=Mus musculus OX=10090 GN=Grm3 PE=1 SV=1
old/young	0.661	0.256743	0.590501	646.22	0.709	1	1	inferred	Q9DCD0	Q9DCD0|6PGD_MOUSE 6-phosphogluconate dehydrogenase, decarboxylating OS=Mus musculus OX=10090 GN=Pgd PE=1 SV=3
old/young	-0.79	0.257742	0.588814	648.74	0.709	1	1	inferred	Q9DC23	Q9DC23|DJC10_MOUSE DnaJ homolog subfamily C member 10 OS=Mus musculus OX=10090 GN=Dnajc10 PE=1 SV=2
old/young	0.529	0.258741	0.587134	651.25	0.71	2	1	unresolved	D3YWQ0;Q80UP3	D3YWQ0|D3YWQ0_MOUSE Diacylglycerol kinase OS=Mus musculus OX=10090 GN=Dgki PE=1 SV=1
old/young	-0.426	0.25974	0.585461	653.77	0.71	3	1	inferred	Q924A2-2	Q924A2-2|CIC_MOUSE Isoform 2 of Protein capicua homolog OS=Mus musculus OX=10090 GN=Cic
old/young	0.393	0.258741	0.587134	651.25	0.711	3	1	unresolved	P61620;Q9JLR1	P61620|S61A1_MOUSE Protein transport protein Sec61 subunit alpha isoform 1 OS=Mus musculus OX=10090 GN=Sec61a1 PE=1 SV=2
old/young	0.309	0.25974	0.585461	653.77	0.711	3	3	inferred	P39098	P39098|MA1A2_MOUSE Mannosyl-oligosaccharide 1,2-alpha-mannosidase IB OS=Mus musculus OX=10090 GN=Man1a2 PE=1 SV=1
old/young	0.309	0.25974	0.585461	653.77	0.711	3	2	inferred	Q9CR64	Q9CR64|KISHA_MOUSE Protein kish-A OS=Mus musculus OX=10090 GN=Tmem167a PE=1 SV=1
old/young	0.327	0.25974	0.585461	653.77	0.712	3	5	inferred	Q9D8V7	Q9D8V7|SC11C_MOUSE Signal peptidase complex catalytic subunit SEC11C OS=Mus musculus OX=10090 GN=Sec11c PE=1 SV=3
old/young	0.822	0.263736	0.57883	663.82	0.712	1	1	inferred	rev_Q6GT24	Q6GT24|Q6GT24_MOUSE reversed Peroxiredoxin-6 OS=Mus musculus OX=10090 GN=Prdx6 PE=1 SV=1
old/young	0.398	0.265734	0.575552	668.85	0.712	3	1	inferred	A0A1W2P7Y9	A0A1W2P7Y9|A0A1W2P7Y9_MOUSE Neuronal cell adhesion molecule OS=Mus musculus OX=10090 GN=Nrcam PE=1 SV=1
old/young	0.307	0.261738	0.582133	658.8	0.713	3	2	unresolved	B2RSH2;P08752;P18872;P18872-2;Q9DC51	B2RSH2|GNAI1_MOUSE Guanine nucleotide-binding protein G(i) subunit alpha-1 OS=Mus musculus OX=10090 GN=Gnai1 PE=1 SV=1
old/young	0.409	0.263736	0.57883	663.82	0.713	3	1	inferred	P97785	P97785|GFRA1_MOUSE GDNF family receptor alpha-1 OS=Mus musculus OX=10090 GN=Gfra1 PE=2 SV=2
old/young	0.374	0.264735	0.577188	666.34	0.713	3	2	inferred	Q921Q7	Q921Q7|RIN1_MOUSE Ras and Rab interactor 1 OS=Mus musculus OX=10090 GN=Rin1 PE=1 SV=1
old/young	0.208	0.264735	0.577188	666.34	0.713	3	18	inferred	Q9D379	Q9D379|HYEP_MOUSE Epoxide hydrolase 1 OS=Mus musculus OX=10090 GN=Ephx1 PE=1 SV=2
old/young	0.314	0.265734	0.575552	668.85	0.713	3	2	inferred	P84309	P84309|ADCY5_MOUSE Adenylate cyclase type 5 OS=Mus musculus OX=10090 GN=Adcy5 PE=1 SV=2
old/young	0.308	0.266733	0.573923	671.37	0.713	3	4	inferred	Q01065	Q01065|PDE1B_MOUSE Calcium/calmodulin-dependent 3',5'-cyclic nucleotide phosphodiesterase 1B OS=Mus musculus OX=10090 GN=Pde1b PE=1 SV=2
old/young	0.377	0.267732	0.572299	673.88	0.713	3	1	inferred	Q91VZ6	Q91VZ6|SMAP1_MOUSE Stromal membrane-associated protein 1 OS=Mus musculus OX=10090 GN=Smap1 PE=1 SV=1
old/young	0.255	0.261738	0.582133	658.8	0.714	3	6	inferred	P15920	P15920|VPP2_MOUSE V-type proton ATPase 116 kDa subunit a isoform 2 OS=Mus musculus OX=10090 GN=Atp6v0a2 PE=1 SV=2
old/young	-0.348	0.262737	0.580478	661.31	0.714	3	1	unresolved	A0A1Y7VJP1;A0A1Y7VK09;A2AGL3;E9Q401	A0A1Y7VJP1|A0A1Y7VJP1_MOUSE Ryanodine receptor 2 (Fragment) OS=Mus musculus OX=10090 GN=Ryr2 PE=1 SV=1
old/young	0.328	0.263736	0.57883	663.82	0.714	3	3	inferred	Q8JZW4	Q8JZW4|CPNE5_MOUSE Copine-5 OS=Mus musculus OX=10090 GN=Cpne5 PE=1 SV=1
old/young	-0.215	0.264735	0.577188	666.34	0.714	3	12	unresolved	P60710;P63260	P60710|ACTB_MOUSE Actin, cytoplasmic 1 OS=Mus musculus OX=10090 GN=Actb PE=1 SV=1
old/young	0.3	0.265734	0.575552	668.85	0.714	3	5	inferred	Q80UP3	Q80UP3|DGKZ_MOUSE Diacylglycerol kinase zeta OS=Mus musculus OX=10090 GN=Dgkz PE=1 SV=2
old/young	-0.318	0.266733	0.573923	671.37	0.714	3	3	inferred	Q9Z0J4	Q9Z0J4|NOS1_MOUSE Nitric oxide synthase, brain OS=Mus musculus OX=10090 GN=Nos1 PE=1 SV=1
old/young	0.299	0.267732	0.572299	673.88	0.714	3	4	inferred	Q8R0X7	Q8R0X7|SGPL1_MOUSE Sphingosine-1-phosphate lyase 1 OS=Mus musculus OX=10090 GN=Sgpl1 PE=1 SV=1
old/young	0.35	0.26973	0.56907	678.91	0.714	3	1	inferred	P62862	P62862|RS30_MOUSE 40S ribosomal protein S30 OS=Mus musculus OX=10090 GN=Fau PE=1 SV=1
old/young	0.229	0.261738	0.582133	658.8	0.715	3	8	inferred	Q8BLE7	Q8BLE7|VGLU2_MOUSE Vesicular glutamate transporter 2 OS=Mus musculus OX=10090 GN=Slc17a6 PE=1 SV=1
old/young	0.392	0.262737	0.580478	661.31	0.715	3	1	inferred	Q8K377	Q8K377|LRRT1_MOUSE Leucine-rich repeat transmembrane neuronal protein 1 OS=Mus musculus OX=10090 GN=Lrrtm1 PE=2 SV=1
old/young	0.445	0.263736	0.57883	663.82	0.715	3	1	inferred	Q9DCX2	Q9DCX2|ATP5H_MOUSE ATP synthase subunit d, mitochondrial OS=Mus musculus OX=10090 GN=Atp5h PE=1 SV=3
old/young	-0.392	0.263736	0.57883	663.82	0.715	3	1	inferred	rev_Q9D0I8	Q9D0I8|MRT4_MOUSE reversed mRNA turnover protein 4 homolog OS=Mus musculus OX=10090 GN=Mrto4 PE=1 SV=1
old/young	-0.388	0.265734	0.575552	668.85	0.715	3	2	inferred	Q922P8	Q922P8|T132A_MOUSE Transmembrane protein 132A OS=Mus musculus OX=10090 GN=Tmem132a PE=1 SV=2
old/young	-0.437	0.267732	0.572299	673.88	0.715	3	1	inferred	P84084	P84084|ARF5_MOUSE ADP-ribosylation factor 5 OS=Mus musculus OX=10090 GN=Arf5 PE=1 SV=2
old/young	0.356	0.267732	0.572299	673.88	0.715	3	1	inferred	A2A690	A2A690|TANC2_MOUSE Protein TANC2 OS=Mus musculus OX=10090 GN=Tanc2 PE=1 SV=1
old/young	0.217	0.268731	0.570682	676.4	0.715	3	10	inferred	Q8BG32	Q8BG32|PSD11_MOUSE 26S proteasome non-ATPase regulatory subunit 11 OS=Mus musculus OX=10090 GN=Psmd11 PE=1 SV=3
old/young	0.321	0.26973	0.56907	678.91	0.715	3	4	inferred	Q8BHE3	Q8BHE3|ATCAY_MOUSE Caytaxin OS=Mus musculus OX=10090 GN=Atcay PE=1 SV=1
old/young	0.302	0.26973	0.56907	678.91	0.715	3	2	inferred	P10637	P10637|TAU_MOUSE Microtubule-associated protein tau OS=Mus musculus OX=10090 GN=Mapt PE=1 SV=3
old/young	0.33	0.277722	0.556389	699.03	0.715	3	1	unresolved	Q6NXK7;Q80VM5	Q6NXK7|DPP10_MOUSE Inactive dipeptidyl peptidase 10 OS=Mus musculus OX=10090 GN=Dpp10 PE=1 SV=1
old/young	-0.225	0.263736	0.57883	663.82	0.716	3	10	inferred	P41216	P41216|ACSL1_MOUSE Long-chain-fatty-acid--CoA ligase 1 OS=Mus musculus OX=10090 GN=Acsl1 PE=1 SV=2
old/young	0.297	0.26973	0.56907	678.91	0.716	3	2	unresolved	P16388;P16390;P63141	P16388|KCNA1_MOUSE Potassium voltage-gated channel subfamily A member 1 OS=Mus musculus OX=10090 GN=Kcna1 PE=1 SV=1
old/young	-0.724	0.270729	0.567465	681.43	0.716	1	1	inferred	Q9JJZ2	Q9JJZ2|TBA8_MOUSE Tubulin alpha-8 chain OS=Mus musculus OX=10090 GN=Tuba8 PE=1 SV=1
old/young	0.415	0.277722	0.556389	699.03	0.716	3	1	inferred	P20352	P20352|TF_MOUSE Tissue factor OS=Mus musculus OX=10090 GN=F3 PE=1 SV=2
old/young	0.207	0.278721	0.55483	701.54	0.716	3	15	inferred	Q04447	Q04447|KCRB_MOUSE Creatine kinase B-type OS=Mus musculus OX=10090 GN=Ckb PE=1 SV=1
old/young	0.451	0.26973	0.56907	678.91	0.717	3	1	inferred	Q8BVA2	Q8BVA2|TM222_MOUSE Transmembrane protein 222 OS=Mus musculus OX=10090 GN=Tmem222 PE=1 SV=1
old/young	0.426	0.271728	0.565865	683.94	0.717	3	1	inferred	Q9ESP1	Q9ESP1|SDF2L_MOUSE Stromal cell-derived factor 2-like protein 1 OS=Mus musculus OX=10090 GN=Sdf2l1 PE=1 SV=2
old/young	0.288	0.276723	0.557954	696.51	0.717	3	4	inferred	Q922Q9	Q922Q9|CHID1_MOUSE Chitinase domain-containing protein 1 OS=Mus musculus OX=10090 GN=Chid1 PE=1 SV=1
old/young	0.346	0.277722	0.556389	699.03	0.717	3	2	inferred	Q9ES56	Q9ES56|TPPC4_MOUSE Trafficking protein particle complex subunit 4 OS=Mus musculus OX=10090 GN=Trappc4 PE=1 SV=1
old/young	-0.246	0.278721	0.55483	701.54	0.717	3	6	inferred	Q99PV0	Q99PV0|PRP8_MOUSE Pre-mRNA-processing-splicing factor 8 OS=Mus musculus OX=10090 GN=Prpf8 PE=1 SV=2
old/young	0.177	0.278721	0.55483	701.54	0.717	3	26	inferred	Q91YQ5	Q91YQ5|RPN1_MOUSE Dolichyl-diphosphooligosaccharide--protein glycosyltransferase subunit 1 OS=Mus musculus OX=10090 GN=Rpn1 PE=1 SV=1
old/young	0.415	0.271728	0.565865	683.94	0.718	3	1	inferred	Q7TNF0	Q7TNF0|DOC2A_MOUSE Double C2-like domain-containing protein alpha OS=Mus musculus OX=10090 GN=Doc2a PE=2 SV=1
old/young	0.357	0.276723	0.557954	696.51	0.718	3	2	inferred	P26049	P26049|GBRA3_MOUSE Gamma-aminobutyric acid receptor subunit alpha-3 OS=Mus musculus OX=10090 GN=Gabra3 PE=1 SV=1
old/young	0.392	0.277722	0.556389	699.03	0.718	3	1	inferred	Q9CQL4	Q9CQL4|RM20_MOUSE 39S ribosomal protein L20, mitochondrial OS=Mus musculus OX=10090 GN=Mrpl20 PE=1 SV=1
old/young	-0.235	0.277722	0.556389	699.03	0.718	3	6	inferred	Q80UG2	Q80UG2|PLXA4_MOUSE Plexin-A4 OS=Mus musculus OX=10090 GN=Plxna4 PE=1 SV=3
old/young	0.807	0.275724	0.559525	694	0.719	1	1	inferred	Q5KU39	Q5KU39|VPS41_MOUSE Vacuolar protein sorting-associated protein 41 homolog OS=Mus musculus OX=10090 GN=Vps41 PE=1 SV=1
old/young	0.3	0.276723	0.557954	696.51	0.719	3	4	inferred	Q8BH82	Q8BH82|NAPEP_MOUSE N-acyl-phosphatidylethanolamine-hydrolyzing phospholipase D OS=Mus musculus OX=10090 GN=Napepld PE=1 SV=1
old/young	0.345	0.277722	0.556389	699.03	0.719	3	1	unresolved	O35927;Q68FH0	O35927|CTND2_MOUSE Catenin delta-2 OS=Mus musculus OX=10090 GN=Ctnnd2 PE=1 SV=1
old/young	0.25	0.280719	0.551728	706.57	0.719	3	5	inferred	Q8BGN3	Q8BGN3|ENPP6_MOUSE Ectonucleotide pyrophosphatase/phosphodiesterase family member 6 OS=Mus musculus OX=10090 GN=Enpp6 PE=1 SV=1
old/young	0.246	0.282717	0.548648	711.6	0.719	3	3	inferred	P18572	P18572|BASI_MOUSE Basigin OS=Mus musculus OX=10090 GN=Bsg PE=1 SV=2
old/young	-0.308	0.283716	0.547116	714.11	0.719	3	3	inferred	Q922J6	Q922J6|TSN2_MOUSE Tetraspanin-2 OS=Mus musculus OX=10090 GN=Tspan2 PE=1 SV=1
old/young	0.201	0.274725	0.561101	691.48	0.72	3	10	inferred	Q6R0H7	Q6R0H7|GNAS1_MOUSE Guanine nucleotide-binding protein G(s) subunit alpha isoforms XLas OS=Mus musculus OX=10090 GN=Gnas PE=1 SV=1
old/young	0.419	0.275724	0.559525	694	0.72	3	1	inferred	Q8BIK4	Q8BIK4|DOCK9_MOUSE Dedicator of cytokinesis protein 9 OS=Mus musculus OX=10090 GN=Dock9 PE=1 SV=2
old/young	0.367	0.276723	0.557954	696.51	0.72	3	1	inferred	P0C0A3	P0C0A3|CHMP6_MOUSE Charged multivesicular body protein 6 OS=Mus musculus OX=10090 GN=Chmp6 PE=1 SV=2
old/young	-0.341	0.276723	0.557954	696.51	0.72	3	4	inferred	Q9WTR1	Q9WTR1|TRPV2_MOUSE Transient receptor potential cation channel subfamily V member 2 OS=Mus musculus OX=10090 GN=Trpv2 PE=1 SV=2
old/young	0.382	0.280719	0.551728	706.57	0.72	3	1	inferred	P31786	P31786|ACBP_MOUSE Acyl-CoA-binding protein OS=Mus musculus OX=10090 GN=Dbi PE=1 SV=2
old/young	-0.234	0.280719	0.551728	706.57	0.72	3	13	inferred	Q8CIQ7	Q8CIQ7|DOCK3_MOUSE Dedicator of cytokinesis protein 3 OS=Mus musculus OX=10090 GN=Dock3 PE=1 SV=1
old/young	0.239	0.281718	0.550185	709.08	0.72	3	5	inferred	A2AEG6	A2AEG6|A2AEG6_MOUSE Glycoprotein m6b, isoform CRA_g OS=Mus musculus OX=10090 GN=Gpm6b PE=1 SV=1
old/young	-0.412	0.282717	0.548648	711.6	0.72	3	2	inferred	Q8K297	Q8K297|GT251_MOUSE Procollagen galactosyltransferase 1 OS=Mus musculus OX=10090 GN=Colgalt1 PE=1 SV=2
old/young	-0.252	0.282717	0.548648	711.6	0.72	3	5	inferred	P08003	P08003|PDIA4_MOUSE Protein disulfide-isomerase A4 OS=Mus musculus OX=10090 GN=Pdia4 PE=1 SV=3
old/young	-0.309	0.283716	0.547116	714.11	0.72	3	3	inferred	O88704	O88704|HCN1_MOUSE Potassium/sodium hyperpolarization-activated cyclic nucleotide-gated channel 1 OS=Mus musculus OX=10090 GN=Hcn1 PE=1 SV=1
old/young	0.322	0.284715	0.545589	716.63	0.72	3	2	inferred	Q9D387	Q9D387|LAMP5_MOUSE Lysosome-associated membrane glycoprotein 5 OS=Mus musculus OX=10090 GN=Lamp5 PE=1 SV=2
old/young	0.486	0.273726	0.562684	688.97	0.721	2	1	inferred	Q8K327	Q8K327|CHAP1_MOUSE Chromosome alignment-maintaining phosphoprotein 1 OS=Mus musculus OX=10090 GN=Champ1 PE=1 SV=1
old/young	-0.217	0.273726	0.562684	688.97	0.721	3	9	inferred	Q9ERD7	Q9ERD7|TBB3_MOUSE Tubulin beta-3 chain OS=Mus musculus OX=10090 GN=Tubb3 PE=1 SV=1
old/young	-0.349	0.274725	0.561101	691.48	0.721	3	2	inferred	Q4VC33	Q4VC33|MAEA_MOUSE Macrophage erythroblast attacher OS=Mus musculus OX=10090 GN=Maea PE=1 SV=1
old/young	-0.456	0.275724	0.559525	694	0.721	2	1	inferred	D3Z4R1	D3Z4R1|HFM1_MOUSE Probable ATP-dependent DNA helicase HFM1 OS=Mus musculus OX=10090 GN=Hfm1 PE=3 SV=2
old/young	-0.428	0.275724	0.559525	694	0.721	3	1	inferred	Q6P5U7	Q6P5U7|NWD2_MOUSE NACHT and WD repeat domain-containing protein 2 OS=Mus musculus OX=10090 GN=Nwd2 PE=1 SV=2
old/young	0.304	0.276723	0.557954	696.51	0.721	3	2	inferred	O88384	O88384|VTI1B_MOUSE Vesicle transport through interaction with t-SNAREs homolog 1B OS=Mus musculus OX=10090 GN=Vti1b PE=1 SV=1
old/young	-0.388	0.281718	0.550185	709.08	0.721	3	1	inferred	Q8BG02	Q8BG02|2ABG_MOUSE Serine/threonine-protein phosphatase 2A 55 kDa regulatory subunit B gamma isoform OS=Mus musculus OX=10090 GN=Ppp2r2c PE=1 SV=1
old/young	-0.232	0.282717	0.548648	711.6	0.721	3	5	unresolved	A0A1Y7VJP1;A0A1Y7VK09;E9Q401	A0A1Y7VJP1|A0A1Y7VJP1_MOUSE Ryanodine receptor 2 (Fragment) OS=Mus musculus OX=10090 GN=Ryr2 PE=1 SV=1
old/young	0.321	0.283716	0.547116	714.11	0.721	3	2	inferred	P60867	P60867|RS20_MOUSE 40S ribosomal protein S20 OS=Mus musculus OX=10090 GN=Rps20 PE=1 SV=1
old/young	0.513	0.284715	0.545589	716.63	0.721	2	1	inferred	A2ARS0	A2ARS0|ANR63_MOUSE Ankyrin repeat domain-containing protein 63 OS=Mus musculus OX=10090 GN=Ankrd63 PE=1 SV=1
old/young	0.374	0.285714	0.544068	719.14	0.721	3	1	unresolved	O35295;P42669	O35295|PURB_MOUSE Transcriptional activator protein Pur-beta OS=Mus musculus OX=10090 GN=Purb PE=1 SV=3
old/young	0.326	0.285714	0.544068	719.14	0.721	3	1	unresolved	O08553;Q62188	O08553|DPYL2_MOUSE Dihydropyrimidinase-related protein 2 OS=Mus musculus OX=10090 GN=Dpysl2 PE=1 SV=2
old/young	0.473	0.286713	0.542552	721.66	0.721	2	1	inferred	O35129	O35129|PHB2_MOUSE Prohibitin-2 OS=Mus musculus OX=10090 GN=Phb2 PE=1 SV=1
old/young	0.333	0.287712	0.541042	724.17	0.721	3	1	unresolved	Q64436;Q6PIC6;Q6PIE5;Q8VDN2	Q64436|ATP4A_MOUSE Potassium-transporting ATPase alpha chain 1 OS=Mus musculus OX=10090 GN=Atp4a PE=1 SV=3
old/young	-0.324	0.274725	0.561101	691.48	0.722	3	1	unresolved	E9QPE7;Q6URW6-3;Q8VDD5	E9QPE7|E9QPE7_MOUSE Myosin-11 OS=Mus musculus OX=10090 GN=Myh11 PE=1 SV=1
old/young	-0.279	0.275724	0.559525	694	0.722	3	4	inferred	Q91W89	Q91W89|MA2C1_MOUSE Alpha-mannosidase 2C1 OS=Mus musculus OX=10090 GN=Man2c1 PE=1 SV=1
old/young	0.395	0.282717	0.548648	711.6	0.722	3	1	inferred	Q8CD26	Q8CD26|S35E1_MOUSE Solute carrier family 35 member E1 OS=Mus musculus OX=10090 GN=Slc35e1 PE=1 SV=2
old/young	0.254	0.285714	0.544068	719.14	0.722	3	4	inferred	O35874	O35874|SATT_MOUSE Neutral amino acid transporter A OS=Mus musculus OX=10090 GN=Slc1a4 PE=1 SV=1
old/young	0.283	0.286713	0.542552	721.66	0.722	3	3	inferred	P68033	P68033|ACTC_MOUSE Actin, alpha cardiac muscle 1 OS=Mus musculus OX=10090 GN=Actc1 PE=1 SV=1
old/young	0.214	0.286713	0.542552	721.66	0.722	3	11	inferred	Q9Z1Q2	Q9Z1Q2|ABHGA_MOUSE Protein ABHD16A OS=Mus musculus OX=10090 GN=Abhd16a PE=1 SV=3
old/young	-0.269	0.287712	0.541042	724.17	0.722	3	8	inferred	Q8VDL4	Q8VDL4|ADPGK_MOUSE ADP-dependent glucokinase OS=Mus musculus OX=10090 GN=Adpgk PE=1 SV=2
old/young	0.76	0.274725	0.561101	691.48	0.723	1	1	inferred	Q6V4S5	Q6V4S5|SDK2_MOUSE Protein sidekick-2 OS=Mus musculus OX=10090 GN=Sdk2 PE=1 SV=1
old/young	0.296	0.287712	0.541042	724.17	0.723	3	2	inferred	Q9CZC8	Q9CZC8|SCRN1_MOUSE Secernin-1 OS=Mus musculus OX=10090 GN=Scrn1 PE=1 SV=1
old/young	-0.228	0.288711	0.539536	726.69	0.723	3	13	inferred	Q9WV92	Q9WV92|E41L3_MOUSE Band 4.1-like protein 3 OS=Mus musculus OX=10090 GN=Epb41l3 PE=1 SV=1
old/young	0.474	0.28971	0.538036	729.2	0.723	3	1	inferred	A6X935	A6X935|ITIH4_MOUSE Inter alpha-trypsin inhibitor, heavy chain 4 OS=Mus musculus OX=10090 GN=Itih4 PE=1 SV=2
old/young	0.753	0.28971	0.538036	729.2	0.724	1	1	inferred	A2APX8	A2APX8|SCN1A_MOUSE Sodium channel protein type 1 subunit alpha OS=Mus musculus OX=10090 GN=Scn1a PE=1 SV=1
old/young	-0.442	0.290709	0.536541	731.72	0.724	3	1	unresolved	Q8BG51;Q8JZN7	Q8BG51|MIRO1_MOUSE Mitochondrial Rho GTPase 1 OS=Mus musculus OX=10090 GN=Rhot1 PE=1 SV=1
old/young	0.334	0.28971	0.538036	729.2	0.725	3	1	unresolved	P84075;Q91X97	P84075|HPCA_MOUSE Neuron-specific calcium-binding protein hippocalcin OS=Mus musculus OX=10090 GN=Hpca PE=1 SV=2
old/young	-0.52	0.290709	0.536541	731.72	0.725	2	1	unresolved	E9Q7X7;Q6P9K9	E9Q7X7|NRX2A_MOUSE Neurexin-2 OS=Mus musculus OX=10090 GN=Nrxn2 PE=1 SV=1
old/young	-0.251	0.291708	0.535051	734.23	0.726	3	3	unresolved	Q7TMM9;Q9CWF2	Q7TMM9|TBB2A_MOUSE Tubulin beta-2A chain OS=Mus musculus OX=10090 GN=Tubb2a PE=1 SV=1
old/young	0.465	0.292707	0.533566	736.74	0.726	2	1	inferred	E9Q407	E9Q407|E9Q407_MOUSE Olfactory receptor 571 OS=Mus musculus OX=10090 GN=Olfr571 PE=3 SV=1
old/young	0.449	0.293706	0.532087	739.26	0.726	3	1	inferred	Q9R049	Q9R049|AMFR_MOUSE E3 ubiquitin-protein ligase AMFR OS=Mus musculus OX=10090 GN=Amfr PE=1 SV=2
old/young	0.406	0.292707	0.533566	736.74	0.727	3	1	inferred	P53810	P53810|PIPNA_MOUSE Phosphatidylinositol transfer protein alpha isoform OS=Mus musculus OX=10090 GN=Pitpna PE=1 SV=2
old/young	0.238	0.292707	0.533566	736.74	0.727	3	8	inferred	Q9JIG8	Q9JIG8|PRAF2_MOUSE PRA1 family protein 2 OS=Mus musculus OX=10090 GN=Praf2 PE=1 SV=1
old/young	0.585	0.293706	0.532087	739.26	0.727	3	11	inferred	P21279	P21279|GNAQ_MOUSE Guanine nucleotide-binding protein G(q) subunit alpha OS=Mus musculus OX=10090 GN=Gnaq PE=1 SV=4
old/young	-0.335	0.292707	0.533566	736.74	0.728	3	2	inferred	Q8C078	Q8C078|KKCC2_MOUSE Calcium/calmodulin-dependent protein kinase kinase 2 OS=Mus musculus OX=10090 GN=Camkk2 PE=1 SV=2
old/young	0.217	0.293706	0.532087	739.26	0.728	3	6	inferred	Q9QYF1	Q9QYF1|RDH11_MOUSE Retinol dehydrogenase 11 OS=Mus musculus OX=10090 GN=Rdh11 PE=1 SV=2
old/young	-0.285	0.295704	0.529142	744.29	0.73	3	4	inferred	P68254	P68254|1433T_MOUSE 14-3-3 protein theta OS=Mus musculus OX=10090 GN=Ywhaq PE=1 SV=1
old/young	0.273	0.295704	0.529142	744.29	0.73	3	4	inferred	Q5SS80	Q5SS80|DHR13_MOUSE Dehydrogenase/reductase SDR family member 13 OS=Mus musculus OX=10090 GN=Dhrs13 PE=1 SV=1
old/young	-0.325	0.296703	0.527678	746.8	0.73	3	1	inferred	O88998	O88998|NOE1_MOUSE Noelin OS=Mus musculus OX=10090 GN=Olfm1 PE=1 SV=1
old/young	-0.257	0.296703	0.527678	746.8	0.731	3	5	inferred	P29341	P29341|PABP1_MOUSE Polyadenylate-binding protein 1 OS=Mus musculus OX=10090 GN=Pabpc1 PE=1 SV=2
old/young	-0.176	0.296703	0.527678	746.8	0.731	3	17	inferred	Q920I9	Q920I9|WDR7_MOUSE WD repeat-containing protein 7 OS=Mus musculus OX=10090 GN=Wdr7 PE=1 SV=3
old/young	0.28	0.297702	0.526218	749.32	0.731	3	2	unresolved	P29387;P62874;P62880	P29387|GBB4_MOUSE Guanine nucleotide-binding protein subunit beta-4 OS=Mus musculus OX=10090 GN=Gnb4 PE=1 SV=4
old/young	-0.403	0.297702	0.526218	749.32	0.732	3	1	inferred	P54320	P54320|ELN_MOUSE Elastin OS=Mus musculus OX=10090 GN=Eln PE=1 SV=2
old/young	0.251	0.298701	0.524763	751.83	0.733	3	5	inferred	Q9D4C9	Q9D4C9|CLVS1_MOUSE Clavesin-1 OS=Mus musculus OX=10090 GN=Clvs1 PE=1 SV=1
old/young	-0.291	0.2997	0.523313	754.35	0.733	3	2	unresolved	Q6ZWU9;Q6ZWY3	Q6ZWU9|RS27_MOUSE 40S ribosomal protein S27 OS=Mus musculus OX=10090 GN=Rps27 PE=1 SV=3
old/young	0.356	0.300699	0.521868	756.86	0.733	3	1	inferred	Q9Z0N1	Q9Z0N1|IF2G_MOUSE Eukaryotic translation initiation factor 2 subunit 3, X-linked OS=Mus musculus OX=10090 GN=Eif2s3x PE=1 SV=2
old/young	0.25	0.302697	0.518991	761.89	0.733	3	5	inferred	P56564	P56564|EAA1_MOUSE Excitatory amino acid transporter 1 OS=Mus musculus OX=10090 GN=Slc1a3 PE=1 SV=2
old/young	0.496	0.2997	0.523313	754.35	0.734	2	1	inferred	Q9R1R2	Q9R1R2|TRIM3_MOUSE Tripartite motif-containing protein 3 OS=Mus musculus OX=10090 GN=Trim3 PE=1 SV=1
old/young	-0.364	0.300699	0.521868	756.86	0.734	3	1	inferred	rev_Q9D2G2	Q9D2G2|ODO2_MOUSE reversed Dihydrolipoyllysine-residue succinyltransferase component of 2-oxoglutarate dehydrogenase complex, mitochondrial OS=Mus musculus OX=10090 GN=Dlst PE=1 SV=1
old/young	0.382	0.301698	0.520427	759.37	0.734	3	1	inferred	Q9CZS1	Q9CZS1|AL1B1_MOUSE Aldehyde dehydrogenase X, mitochondrial OS=Mus musculus OX=10090 GN=Aldh1b1 PE=1 SV=1
old/young	0.194	0.302697	0.518991	761.89	0.734	3	19	inferred	P61264	P61264|STX1B_MOUSE Syntaxin-1B OS=Mus musculus OX=10090 GN=Stx1b PE=1 SV=1
old/young	0.266	0.2997	0.523313	754.35	0.735	3	3	inferred	A2AJA9	A2AJA9|AJM1_MOUSE Apical junction component 1 homolog OS=Mus musculus OX=10090 GN=Ajm1 PE=1 SV=1
old/young	0.342	0.300699	0.521868	756.86	0.735	3	3	inferred	Q3UM45	Q3UM45|PP1R7_MOUSE Protein phosphatase 1 regulatory subunit 7 OS=Mus musculus OX=10090 GN=Ppp1r7 PE=1 SV=2
old/young	0.239	0.301698	0.520427	759.37	0.735	3	6	inferred	P62245	P62245|RS15A_MOUSE 40S ribosomal protein S15a OS=Mus musculus OX=10090 GN=Rps15a PE=1 SV=2
old/young	0.318	0.302697	0.518991	761.89	0.735	3	2	inferred	Q61423	Q61423|KCNA4_MOUSE Potassium voltage-gated channel subfamily A member 4 OS=Mus musculus OX=10090 GN=Kcna4 PE=1 SV=2
old/young	-0.306	0.302697	0.518991	761.89	0.735	3	2	inferred	Q920P5	Q920P5|KAD5_MOUSE Adenylate kinase isoenzyme 5 OS=Mus musculus OX=10090 GN=Ak5 PE=1 SV=2
old/young	-0.319	0.303696	0.51756	764.4	0.735	3	2	inferred	Q8R4E6	Q8R4E6|PURG_MOUSE Purine-rich element-binding protein gamma OS=Mus musculus OX=10090 GN=Purg PE=1 SV=1
old/young	0.274	0.304695	0.516134	766.92	0.735	3	3	inferred	P62843	P62843|RS15_MOUSE 40S ribosomal protein S15 OS=Mus musculus OX=10090 GN=Rps15 PE=1 SV=2
old/young	-0.246	0.302697	0.518991	761.89	0.736	3	3	inferred	P47915	P47915|RL29_MOUSE 60S ribosomal protein L29 OS=Mus musculus OX=10090 GN=Rpl29 PE=1 SV=2
old/young	-0.334	0.304695	0.516134	766.92	0.736	3	2	inferred	O09117-2	O09117-2|SYPL1_MOUSE Isoform 2 of Synaptophysin-like protein 1 OS=Mus musculus OX=10090 GN=Sypl1
old/young	-0.327	0.304695	0.516134	766.92	0.737	3	2	inferred	Q9QZX7	Q9QZX7|SRR_MOUSE Serine racemase OS=Mus musculus OX=10090 GN=Srr PE=1 SV=1
old/young	0.406	0.305694	0.514713	769.43	0.737	3	1	inferred	Q8CGK3	Q8CGK3|LONM_MOUSE Lon protease homolog, mitochondrial OS=Mus musculus OX=10090 GN=Lonp1 PE=1 SV=2
old/young	-0.323	0.306693	0.513296	771.95	0.739	3	1	inferred	P21995	P21995|EMB_MOUSE Embigin OS=Mus musculus OX=10090 GN=Emb PE=1 SV=2
old/young	0.309	0.307692	0.511883	774.46	0.739	3	1	unresolved	Q64436;Q6PIC6;Q6PIE5;Q8VDN2;Q9WV27	Q64436|ATP4A_MOUSE Potassium-transporting ATPase alpha chain 1 OS=Mus musculus OX=10090 GN=Atp4a PE=1 SV=3
old/young	0.343	0.308691	0.510476	776.98	0.739	3	1	inferred	P00761	P00761|TRYP_PIG Trypsin OS=Sus scrofa PE=1 SV=1
old/young	-0.33	0.308691	0.510476	776.98	0.739	3	2	inferred	Q9WTS5	Q9WTS5|TEN2_MOUSE Teneurin-2 OS=Mus musculus OX=10090 GN=Tenm2 PE=1 SV=1
old/young	-0.676	0.307692	0.511883	774.46	0.74	1	1	inferred	Q6A4J8	Q6A4J8|UBP7_MOUSE Ubiquitin carboxyl-terminal hydrolase 7 OS=Mus musculus OX=10090 GN=Usp7 PE=1 SV=1
old/young	-0.182	0.307692	0.511883	774.46	0.74	3	28	inferred	P62814	P62814|VATB2_MOUSE V-type proton ATPase subunit B, brain isoform OS=Mus musculus OX=10090 GN=Atp6v1b2 PE=1 SV=1
old/young	0.54	0.308691	0.510476	776.98	0.74	2	1	inferred	O35127	O35127|C10_MOUSE Protein C10 OS=Mus musculus OX=10090 GN=Grcc10 PE=1 SV=1
old/young	0.234	0.30969	0.509072	779.49	0.74	3	5	inferred	Q9D2G2	Q9D2G2|ODO2_MOUSE Dihydrolipoyllysine-residue succinyltransferase component of 2-oxoglutarate dehydrogenase complex, mitochondrial OS=Mus musculus OX=10090 GN=Dlst PE=1 SV=1
old/young	0.248	0.308691	0.510476	776.98	0.741	3	3	unresolved	A0A0J9YTW6;A2APX8;F7D6J5	A0A0J9YTW6|A0A0J9YTW6_MOUSE Sodium channel protein OS=Mus musculus OX=10090 GN=Scn2a PE=1 SV=1
old/young	-0.475	0.310689	0.507674	782	0.741	2	1	inferred	Q9D4V7	Q9D4V7|RABL3_MOUSE Rab-like protein 3 OS=Mus musculus OX=10090 GN=Rabl3 PE=1 SV=1
old/young	0.377	0.310689	0.507674	782	0.741	3	1	inferred	Q9CPU0	Q9CPU0|LGUL_MOUSE Lactoylglutathione lyase OS=Mus musculus OX=10090 GN=Glo1 PE=1 SV=3
old/young	0.364	0.310689	0.507674	782	0.742	3	1	inferred	Q9R0Q3	Q9R0Q3|TMED2_MOUSE Transmembrane emp24 domain-containing protein 2 OS=Mus musculus OX=10090 GN=Tmed2 PE=1 SV=1
old/young	-0.244	0.312687	0.50489	787.03	0.743	3	6	inferred	Q0VE82	Q0VE82|CPNE7_MOUSE Copine-7 OS=Mus musculus OX=10090 GN=Cpne7 PE=1 SV=1
old/young	0.368	0.313686	0.503504	789.55	0.743	3	1	inferred	E9PZF0	E9PZF0|E9PZF0_MOUSE Nucleoside diphosphate kinase OS=Mus musculus OX=10090 GN=Gm20390 PE=3 SV=1
old/young	0.288	0.313686	0.503504	789.55	0.743	3	3	inferred	Q91XU3	Q91XU3|PI42C_MOUSE Phosphatidylinositol 5-phosphate 4-kinase type-2 gamma OS=Mus musculus OX=10090 GN=Pip4k2c PE=1 SV=1
old/young	-0.207	0.314685	0.502124	792.06	0.743	3	8	inferred	P14873	P14873|MAP1B_MOUSE Microtubule-associated protein 1B OS=Mus musculus OX=10090 GN=Map1b PE=1 SV=2
old/young	0.255	0.312687	0.50489	787.03	0.744	3	3	inferred	Q9D428	Q9D428|GOG7B_MOUSE Golgin subfamily A member 7B OS=Mus musculus OX=10090 GN=GOLGA7B PE=1 SV=1
old/young	0.213	0.313686	0.503504	789.55	0.744	3	7	inferred	Q3U7R1	Q3U7R1|ESYT1_MOUSE Extended synaptotagmin-1 OS=Mus musculus OX=10090 GN=Esyt1 PE=1 SV=2
old/young	0.242	0.314685	0.502124	792.06	0.744	3	4	inferred	Q80TR1	Q80TR1|AGRL1_MOUSE Adhesion G protein-coupled receptor L1 OS=Mus musculus OX=10090 GN=Adgrl1 PE=1 SV=2
old/young	-0.213	0.314685	0.502124	792.06	0.744	3	11	inferred	Q9R1C6	Q9R1C6|DGKE_MOUSE Diacylglycerol kinase epsilon OS=Mus musculus OX=10090 GN=Dgke PE=1 SV=1
old/young	0.256	0.312687	0.50489	787.03	0.745	3	4	inferred	Q9D051	Q9D051|ODPB_MOUSE Pyruvate dehydrogenase E1 component subunit beta, mitochondrial OS=Mus musculus OX=10090 GN=Pdhb PE=1 SV=1
old/young	-0.386	0.313686	0.503504	789.55	0.745	3	1	inferred	Q99LH2	Q99LH2|PTSS1_MOUSE Phosphatidylserine synthase 1 OS=Mus musculus OX=10090 GN=Ptdss1 PE=1 SV=1
old/young	0.369	0.315684	0.500747	794.58	0.745	3	1	inferred	rev_B2RX88	B2RX88|CSPP1_MOUSE reversed Centrosome and spindle pole associated protein 1 OS=Mus musculus OX=10090 GN=Cspp1 PE=1 SV=2
old/young	0.239	0.316683	0.499375	797.09	0.746	3	3	inferred	Q6ZQ18	Q6ZQ18|EFR3B_MOUSE Protein EFR3 homolog B OS=Mus musculus OX=10090 GN=Efr3b PE=1 SV=2
old/young	0.327	0.318681	0.496643	802.12	0.747	3	1	inferred	Q91XL3	Q91XL3|UXS1_MOUSE UDP-glucuronic acid decarboxylase 1 OS=Mus musculus OX=10090 GN=Uxs1 PE=1 SV=1
old/young	-0.154	0.317682	0.498007	799.61	0.748	3	41	inferred	Q01853	Q01853|TERA_MOUSE Transitional endoplasmic reticulum ATPase OS=Mus musculus OX=10090 GN=Vcp PE=1 SV=4
old/young	-0.409	0.318681	0.496643	802.12	0.748	3	1	inferred	O35226	O35226|PSMD4_MOUSE 26S proteasome non-ATPase regulatory subunit 4 OS=Mus musculus OX=10090 GN=Psmd4 PE=1 SV=1
old/young	0.289	0.318681	0.496643	802.12	0.748	3	2	inferred	Q6PDC0	Q6PDC0|RUN3B_MOUSE RUN domain-containing protein 3B OS=Mus musculus OX=10090 GN=Rundc3b PE=1 SV=1
old/young	-0.395	0.31968	0.495284	804.64	0.748	3	3	inferred	E9QK04	E9QK04|E9QK04_MOUSE Neogenin OS=Mus musculus OX=10090 GN=Neo1 PE=1 SV=1
old/young	-0.291	0.31968	0.495284	804.64	0.748	3	4	inferred	Q61361	Q61361|PGCB_MOUSE Brevican core protein OS=Mus musculus OX=10090 GN=Bcan PE=1 SV=2
old/young	-0.407	0.318681	0.496643	802.12	0.749	3	1	inferred	Q9Z266	Q9Z266|SNAPN_MOUSE SNARE-associated protein Snapin OS=Mus musculus OX=10090 GN=Snapin PE=1 SV=1
old/young	-0.294	0.320679	0.493929	807.15	0.749	3	2	inferred	Q8C0E9	Q8C0E9|Q8C0E9_MOUSE PH and SEC7 domain-containing protein 3 OS=Mus musculus OX=10090 GN=Psd3 PE=1 SV=1
old/young	0.376	0.318681	0.496643	802.12	0.75	3	1	inferred	Q9JJ61	Q9JJ61|GLT16_MOUSE Polypeptide N-acetylgalactosaminyltransferase 16 OS=Mus musculus OX=10090 GN=Galnt16 PE=2 SV=2
old/young	0.315	0.321678	0.492578	809.66	0.75	3	3	inferred	Q80UG5	Q80UG5|SEPT9_MOUSE Septin-9 OS=Mus musculus OX=10090 GN=Sept9 PE=1 SV=1
old/young	-0.355	0.321678	0.492578	809.66	0.751	3	1	unresolved	P68372;P99024;Q7TMM9;Q922F4;Q9CWF2;Q9D6F9;Q9ERD7	P68372|TBB4B_MOUSE Tubulin beta-4B chain OS=Mus musculus OX=10090 GN=Tubb4b PE=1 SV=1
old/young	0.689	0.322677	0.491232	812.18	0.751	1	1	inferred	Q5HZI2	Q5HZI2|C2C4C_MOUSE C2 calcium-dependent domain-containing protein 4C OS=Mus musculus OX=10090 GN=C2cd4cC2CD4 family PE=1 SV=1
old/young	0.168	0.322677	0.491232	812.18	0.752	3	14	inferred	Q99JP7	Q99JP7|GGT7_MOUSE Glutathione hydrolase 7 OS=Mus musculus OX=10090 GN=Ggt7 PE=1 SV=2
old/young	-0.29	0.323676	0.489889	814.69	0.753	3	1	unresolved	P68372;P99024;Q7TMM9;Q9CWF2	P68372|TBB4B_MOUSE Tubulin beta-4B chain OS=Mus musculus OX=10090 GN=Tubb4b PE=1 SV=1
old/young	0.32	0.325674	0.487216	819.72	0.754	3	1	inferred	Q8CGQ8-2	Q8CGQ8-2|NCKX4_MOUSE Isoform 2 of Sodium/potassium/calcium exchanger 4 OS=Mus musculus OX=10090 GN=Slc24a4
old/young	0.335	0.324675	0.488551	817.21	0.755	2	2	inferred	Q9D6G9	Q9D6G9|CKLF5_MOUSE CKLF-like MARVEL transmembrane domain-containing protein 5 OS=Mus musculus OX=10090 GN=Cmtm5 PE=1 SV=1
old/young	0.18	0.325674	0.487216	819.72	0.755	3	8	inferred	Q8K2C9	Q8K2C9|HACD3_MOUSE Very-long-chain (3R)-3-hydroxyacyl-CoA dehydratase 3 OS=Mus musculus OX=10090 GN=Hacd3 PE=1 SV=2
old/young	0.377	0.326673	0.485886	822.24	0.755	3	1	inferred	Q8VCH6	Q8VCH6|DHC24_MOUSE Delta(24)-sterol reductase OS=Mus musculus OX=10090 GN=Dhcr24 PE=1 SV=1
old/young	-0.308	0.327672	0.48456	824.75	0.755	3	2	inferred	Q9CXP8	Q9CXP8|GBG10_MOUSE Guanine nucleotide-binding protein G(I)/G(S)/G(O) subunit gamma-10 OS=Mus musculus OX=10090 GN=Gng10 PE=3 SV=1
old/young	0.228	0.327672	0.48456	824.75	0.755	3	5	inferred	Q6P1F6	Q6P1F6|2ABA_MOUSE Serine/threonine-protein phosphatase 2A 55 kDa regulatory subunit B alpha isoform OS=Mus musculus OX=10090 GN=Ppp2r2a PE=1 SV=1
old/young	-0.335	0.328671	0.483238	827.27	0.755	3	2	inferred	P08553	P08553|NFM_MOUSE Neurofilament medium polypeptide OS=Mus musculus OX=10090 GN=Nefm PE=1 SV=4
old/young	-0.527	0.325674	0.487216	819.72	0.756	2	1	inferred	Q9CXI3	Q9CXI3|MOXD1_MOUSE DBH-like monooxygenase protein 1 OS=Mus musculus OX=10090 GN=Moxd1 PE=1 SV=1
old/young	0.221	0.325674	0.487216	819.72	0.756	3	6	inferred	P63213	P63213|GBG2_MOUSE Guanine nucleotide-binding protein G(I)/G(S)/G(O) subunit gamma-2 OS=Mus musculus OX=10090 GN=Gng2 PE=1 SV=2
old/young	0.278	0.326673	0.485886	822.24	0.756	3	2	inferred	Q9CQN6	Q9CQN6|TM14C_MOUSE Transmembrane protein 14C OS=Mus musculus OX=10090 GN=Tmem14c PE=1 SV=1
old/young	0.172	0.327672	0.48456	824.75	0.756	3	13	inferred	O35526	O35526|STX1A_MOUSE Syntaxin-1A OS=Mus musculus OX=10090 GN=Stx1a PE=1 SV=3
old/young	0.178	0.328671	0.483238	827.27	0.756	3	19	inferred	P48036	P48036|ANXA5_MOUSE Annexin A5 OS=Mus musculus OX=10090 GN=Anxa5 PE=1 SV=1
old/young	-0.219	0.32967	0.48192	829.78	0.756	3	10	inferred	O88935	O88935|SYN1_MOUSE Synapsin-1 OS=Mus musculus OX=10090 GN=Syn1 PE=1 SV=2
old/young	0.204	0.32967	0.48192	829.78	0.756	3	13	inferred	Q6PHN9	Q6PHN9|RAB35_MOUSE Ras-related protein Rab-35 OS=Mus musculus OX=10090 GN=Rab35 PE=1 SV=1
old/young	-0.294	0.327672	0.48456	824.75	0.757	3	2	inferred	P35585	P35585|AP1M1_MOUSE AP-1 complex subunit mu-1 OS=Mus musculus OX=10090 GN=Ap1m1 PE=1 SV=3
old/young	0.265	0.32967	0.48192	829.78	0.757	3	4	inferred	Q80WM4	Q80WM4|HPLN4_MOUSE Hyaluronan and proteoglycan link protein 4 OS=Mus musculus OX=10090 GN=Hapln4 PE=2 SV=2
old/young	-0.648	0.330669	0.480606	832.29	0.757	1	1	inferred	Q8CAA7	Q8CAA7|PGM2L_MOUSE Glucose 1,6-bisphosphate synthase OS=Mus musculus OX=10090 GN=Pgm2l1 PE=1 SV=1
old/young	0.858	0.331668	0.479296	834.81	0.759	1	1	inferred	Q99JR1	Q99JR1|SFXN1_MOUSE Sideroflexin-1 OS=Mus musculus OX=10090 GN=Sfxn1 PE=1 SV=3
old/young	-0.256	0.332667	0.47799	837.32	0.759	3	2	unresolved	Q5SV64;Q61879;Q6URW6-3	Q5SV64|Q5SV64_MOUSE Myosin-10 OS=Mus musculus OX=10090 GN=Myh10 PE=1 SV=1
old/young	-0.334	0.332667	0.47799	837.32	0.76	3	2	inferred	Q8K0S0	Q8K0S0|PHYIP_MOUSE Phytanoyl-CoA hydroxylase-interacting protein OS=Mus musculus OX=10090 GN=Phyhip PE=1 SV=1
old/young	0.346	0.333666	0.476688	839.84	0.76	3	1	unresolved	Q7TPR4;Q9JI91	Q7TPR4|ACTN1_MOUSE Alpha-actinin-1 OS=Mus musculus OX=10090 GN=Actn1 PE=1 SV=1
old/young	0.522	0.334665	0.475389	842.35	0.76	2	1	inferred	Q9JK48	Q9JK48|SHLB1_MOUSE Endophilin-B1 OS=Mus musculus OX=10090 GN=Sh3glb1 PE=1 SV=1
old/young	0.269	0.332667	0.47799	837.32	0.761	3	5	unresolved	E9Q1V2;Q8JZW4	E9Q1V2|E9Q1V2_MOUSE Copine-5 (Fragment) OS=Mus musculus OX=10090 GN=Cpne5 PE=1 SV=1
old/young	0.288	0.333666	0.476688	839.84	0.761	3	2	inferred	Q8K386	Q8K386|RAB15_MOUSE Ras-related protein Rab-15 OS=Mus musculus OX=10090 GN=Rab15 PE=1 SV=1
old/young	0.535	0.334665	0.475389	842.35	0.761	2	1	inferred	Q9WTU6	Q9WTU6|MK09_MOUSE Mitogen-activated protein kinase 9 OS=Mus musculus OX=10090 GN=Mapk9 PE=1 SV=2
old/young	0.431	0.335664	0.474095	844.87	0.761	2	2	inferred	Q0P5W1	Q0P5W1|VPS8_MOUSE Vacuolar protein sorting-associated protein 8 homolog OS=Mus musculus OX=10090 GN=Vps8 PE=1 SV=1
old/young	0.244	0.336663	0.472804	847.38	0.761	3	4	inferred	Q9D3A9	Q9D3A9|TTYH1_MOUSE Protein tweety homolog 1 OS=Mus musculus OX=10090 GN=Ttyh1 PE=1 SV=1
old/young	0.203	0.336663	0.472804	847.38	0.761	3	8	inferred	Q8BP92	Q8BP92|RCN2_MOUSE Reticulocalbin-2 OS=Mus musculus OX=10090 GN=Rcn2 PE=1 SV=1
old/young	-0.259	0.338661	0.470234	852.41	0.761	3	3	unresolved	G5E8K5;Q8C8R3-2	G5E8K5|ANK3_MOUSE Ankyrin-3 OS=Mus musculus OX=10090 GN=Ank3 PE=1 SV=1
old/young	0.34	0.334665	0.475389	842.35	0.762	3	1	inferred	Q9EP53	Q9EP53|TSC1_MOUSE Hamartin OS=Mus musculus OX=10090 GN=Tsc1 PE=1 SV=1
old/young	-0.167	0.335664	0.474095	844.87	0.762	3	16	inferred	P28660	P28660|NCKP1_MOUSE Nck-associated protein 1 OS=Mus musculus OX=10090 GN=Nckap1 PE=1 SV=2
old/young	0.32	0.336663	0.472804	847.38	0.762	3	1	inferred	B2RX88	B2RX88|CSPP1_MOUSE Centrosome and spindle pole associated protein 1 OS=Mus musculus OX=10090 GN=Cspp1 PE=1 SV=2
old/young	0.298	0.337662	0.471517	849.9	0.762	3	2	inferred	Q9DCP2	Q9DCP2|S38A3_MOUSE Sodium-coupled neutral amino acid transporter 3 OS=Mus musculus OX=10090 GN=Slc38a3 PE=1 SV=1
old/young	0.264	0.337662	0.471517	849.9	0.762	3	3	inferred	Q6NZL0	Q6NZL0|SOGA3_MOUSE Protein SOGA3 OS=Mus musculus OX=10090 GN=Soga3 PE=1 SV=2
old/young	0.611	0.338661	0.470234	852.41	0.762	2	1	inferred	O54988	O54988|SLK_MOUSE STE20-like serine/threonine-protein kinase OS=Mus musculus OX=10090 GN=Slk PE=1 SV=2
old/young	0.211	0.338661	0.470234	852.41	0.762	3	6	inferred	Q8VBT0	Q8VBT0|TMX1_MOUSE Thioredoxin-related transmembrane protein 1 OS=Mus musculus OX=10090 GN=Tmx1 PE=1 SV=1
old/young	0.237	0.336663	0.472804	847.38	0.763	3	4	inferred	Q8VCW8	Q8VCW8|ACSF2_MOUSE Acyl-CoA synthetase family member 2, mitochondrial OS=Mus musculus OX=10090 GN=Acsf2 PE=1 SV=1
old/young	0.404	0.338661	0.470234	852.41	0.763	3	1	inferred	Q99JN2	Q99JN2|KLH22_MOUSE Kelch-like protein 22 OS=Mus musculus OX=10090 GN=Klhl22 PE=1 SV=1
old/young	0.295	0.33966	0.468955	854.93	0.763	3	1	inferred	P68181	P68181|KAPCB_MOUSE cAMP-dependent protein kinase catalytic subunit beta OS=Mus musculus OX=10090 GN=Prkacb PE=1 SV=2
old/young	-0.478	0.342657	0.46514	862.47	0.763	2	1	inferred	Q6NXM3	Q6NXM3|TM130_MOUSE Transmembrane protein 130 OS=Mus musculus OX=10090 GN=Tmem130 PE=2 SV=1
old/young	0.263	0.350649	0.455127	882.58	0.763	3	2	inferred	P46935	P46935|NEDD4_MOUSE E3 ubiquitin-protein ligase NEDD4 OS=Mus musculus OX=10090 GN=Nedd4 PE=1 SV=3
old/young	-0.166	0.350649	0.455127	882.58	0.763	3	17	inferred	P97351	P97351|RS3A_MOUSE 40S ribosomal protein S3a OS=Mus musculus OX=10090 GN=Rps3a PE=1 SV=3
old/young	-0.225	0.340659	0.46768	857.44	0.764	3	4	inferred	Q3UVL4	Q3UVL4|VPS51_MOUSE Vacuolar protein sorting-associated protein 51 homolog OS=Mus musculus OX=10090 GN=Vps51 PE=1 SV=2
old/young	0.362	0.342657	0.46514	862.47	0.764	3	1	inferred	Q80UP8	Q80UP8|S20A2_MOUSE Sodium-dependent phosphate transporter 2 OS=Mus musculus OX=10090 GN=Slc20a2 PE=1 SV=2
old/young	-0.238	0.343656	0.463876	864.98	0.764	3	3	unresolved	E9QPE7;Q5SV64;Q61879	E9QPE7|E9QPE7_MOUSE Myosin-11 OS=Mus musculus OX=10090 GN=Myh11 PE=1 SV=1
old/young	0.35	0.344655	0.462615	867.5	0.764	3	1	inferred	Q09M02	Q09M02|CBPC5_MOUSE Cytosolic carboxypeptidase-like protein 5 OS=Mus musculus OX=10090 GN=Agbl5 PE=1 SV=2
old/young	0.328	0.344655	0.462615	867.5	0.764	3	1	inferred	Q8CJ61	Q8CJ61|CKLF4_MOUSE CKLF-like MARVEL transmembrane domain-containing protein 4 OS=Mus musculus OX=10090 GN=Cmtm4 PE=1 SV=1
old/young	0.193	0.350649	0.455127	882.58	0.764	3	10	inferred	Q9D517	Q9D517|PLCC_MOUSE 1-acyl-sn-glycerol-3-phosphate acyltransferase gamma OS=Mus musculus OX=10090 GN=Agpat3 PE=1 SV=2
old/young	0.218	0.351648	0.453891	885.1	0.764	3	6	inferred	D3Z286	D3Z286|D3Z286_MOUSE Transmembrane protein with metallophosphoesterase domain OS=Mus musculus OX=10090 GN=Tmppe PE=1 SV=2
old/young	0.28	0.341658	0.466408	859.95	0.765	3	1	inferred	Q99J56	Q99J56|DERL1_MOUSE Derlin-1 OS=Mus musculus OX=10090 GN=Derl1 PE=1 SV=1
old/young	-0.727	0.342657	0.46514	862.47	0.765	1	1	inferred	Q9D1M4	Q9D1M4|MCA3_MOUSE Eukaryotic translation elongation factor 1 epsilon-1 OS=Mus musculus OX=10090 GN=Eef1e1 PE=1 SV=1
old/young	0.223	0.342657	0.46514	862.47	0.765	3	6	unresolved	P61164;Q8R5C5	P61164|ACTZ_MOUSE Alpha-centractin OS=Mus musculus OX=10090 GN=Actr1a PE=1 SV=1
old/young	0.342	0.343656	0.463876	864.98	0.765	3	1	inferred	rev_Q9D1F3	Q9D1F3|CX040_MOUSE reversed Uncharacterized protein CXorf40 homolog OS=Mus musculus OX=10090 PE=1 SV=1
old/young	0.262	0.344655	0.462615	867.5	0.765	3	3	inferred	Q8BMG7	Q8BMG7|RBGPR_MOUSE Rab3 GTPase-activating protein non-catalytic subunit OS=Mus musculus OX=10090 GN=Rab3gap2 PE=1 SV=2
old/young	0.205	0.34965	0.456366	880.07	0.765	3	8	inferred	Q07076	Q07076|ANXA7_MOUSE Annexin A7 OS=Mus musculus OX=10090 GN=Anxa7 PE=1 SV=2
old/young	0.194	0.34965	0.456366	880.07	0.765	3	9	inferred	Q9R1P4	Q9R1P4|PSA1_MOUSE Proteasome subunit alpha type-1 OS=Mus musculus OX=10090 GN=Psma1 PE=1 SV=1
old/young	0.555	0.350649	0.455127	882.58	0.765	2	1	inferred	P10605	P10605|CATB_MOUSE Cathepsin B OS=Mus musculus OX=10090 GN=Ctsb PE=1 SV=2
old/young	0.166	0.350649	0.455127	882.58	0.765	3	13	inferred	Q6ZWN5	Q6ZWN5|RS9_MOUSE 40S ribosomal protein S9 OS=Mus musculus OX=10090 GN=Rps9 PE=1 SV=3
old/young	0.418	0.352647	0.452659	887.61	0.765	3	1	inferred	Q63959	Q63959|KCNC3_MOUSE Potassium voltage-gated channel subfamily C member 3 OS=Mus musculus OX=10090 GN=Kcnc3 PE=1 SV=2
old/young	0.231	0.353646	0.451431	890.13	0.765	3	2	inferred	P63001	P63001|RAC1_MOUSE Ras-related C3 botulinum toxin substrate 1 OS=Mus musculus OX=10090 GN=Rac1 PE=1 SV=1
old/young	0.232	0.341658	0.466408	859.95	0.766	3	3	inferred	Q9CRD2	Q9CRD2|EMC2_MOUSE ER membrane protein complex subunit 2 OS=Mus musculus OX=10090 GN=Emc2 PE=1 SV=1
old/young	0.389	0.342657	0.46514	862.47	0.766	3	1	inferred	rev_Q99N96	Q99N96|RM01_MOUSE reversed 39S ribosomal protein L1, mitochondrial OS=Mus musculus OX=10090 GN=Mrpl1 PE=1 SV=2
old/young	0.513	0.344655	0.462615	867.5	0.766	2	1	inferred	Q8R0A7	Q8R0A7|K0513_MOUSE Uncharacterized protein KIAA0513 OS=Mus musculus OX=10090 GN=Kiaa0513 PE=1 SV=1
old/young	0.349	0.347652	0.458855	875.04	0.766	3	1	inferred	Q3TDQ1	Q3TDQ1|STT3B_MOUSE Dolichyl-diphosphooligosaccharide--protein glycosyltransferase subunit STT3B OS=Mus musculus OX=10090 GN=Stt3b PE=1 SV=2
old/young	0.163	0.348651	0.457609	877.56	0.766	3	14	inferred	Q60634	Q60634|FLOT2_MOUSE Flotillin-2 OS=Mus musculus OX=10090 GN=Flot2 PE=1 SV=2
old/young	0.362	0.34965	0.456366	880.07	0.766	3	1	inferred	Q3USZ8	Q3USZ8|DIA1_MOUSE Deleted in autism protein 1 homolog OS=Mus musculus OX=10090 PE=1 SV=2
old/young	0.193	0.350649	0.455127	882.58	0.766	3	10	inferred	Q3UVK0	Q3UVK0|ERMP1_MOUSE Endoplasmic reticulum metallopeptidase 1 OS=Mus musculus OX=10090 GN=Ermp1 PE=1 SV=2
old/young	-0.195	0.352647	0.452659	887.61	0.766	3	9	inferred	Q62443	Q62443|NPTX1_MOUSE Neuronal pentraxin-1 OS=Mus musculus OX=10090 GN=Nptx1 PE=1 SV=1
old/young	-0.811	0.353646	0.451431	890.13	0.766	1	1	inferred	P43277	P43277|H13_MOUSE Histone H1.3 OS=Mus musculus OX=10090 GN=Hist1h1d PE=1 SV=2
old/young	-0.376	0.354645	0.450206	892.64	0.766	2	1	inferred	Q8BLN5	Q8BLN5|ERG7_MOUSE Lanosterol synthase OS=Mus musculus OX=10090 GN=Lss PE=1 SV=2
old/young	0.369	0.354645	0.450206	892.64	0.766	3	1	inferred	Q91W43	Q91W43|GCSP_MOUSE Glycine dehydrogenase (decarboxylating), mitochondrial OS=Mus musculus OX=10090 GN=Gldc PE=1 SV=1
old/young	-0.352	0.355644	0.448984	895.16	0.766	3	1	inferred	D3YYQ8	D3YYQ8|D3YYQ8_MOUSE Dynein, axonemal, heavy chain 10 OS=Mus musculus OX=10090 GN=Dnah10 PE=1 SV=2
old/young	0.304	0.355644	0.448984	895.16	0.766	3	1	inferred	P54830	P54830|PTN5_MOUSE Tyrosine-protein phosphatase non-receptor type 5 OS=Mus musculus OX=10090 GN=Ptpn5 PE=1 SV=2
old/young	-0.349	0.342657	0.46514	862.47	0.767	3	1	inferred	Q8JZM4	Q8JZM4|DNER_MOUSE Delta and Notch-like epidermal growth factor-related receptor OS=Mus musculus OX=10090 GN=Dner PE=1 SV=1
old/young	-0.799	0.346653	0.460105	872.53	0.767	1	1	inferred	Q7TQI3	Q7TQI3|OTUB1_MOUSE Ubiquitin thioesterase OTUB1 OS=Mus musculus OX=10090 GN=Otub1 PE=1 SV=2
old/young	0.386	0.346653	0.460105	872.53	0.767	2	1	inferred	Q6IFX2	Q6IFX2|K1C42_MOUSE Keratin, type I cytoskeletal 42 OS=Mus musculus OX=10090 GN=Krt42 PE=1 SV=1
old/young	-0.418	0.347652	0.458855	875.04	0.767	3	1	inferred	Q8C341	Q8C341|SUCO_MOUSE SUN domain-containing ossification factor OS=Mus musculus OX=10090 GN=Suco PE=1 SV=3
old/young	0.206	0.348651	0.457609	877.56	0.767	3	5	inferred	P62264	P62264|RS14_MOUSE 40S ribosomal protein S14 OS=Mus musculus OX=10090 GN=Rps14 PE=1 SV=3
old/young	0.423	0.34965	0.456366	880.07	0.767	3	1	inferred	Q5XG69	Q5XG69|F169A_MOUSE Soluble lamin-associated protein of 75 kDa OS=Mus musculus OX=10090 GN=Fam169a PE=1 SV=3
old/young	0.292	0.34965	0.456366	880.07	0.767	3	3	unresolved	G5E829;S4R1C4	G5E829|AT2B1_MOUSE Plasma membrane calcium-transporting ATPase 1 OS=Mus musculus OX=10090 GN=Atp2b1 PE=1 SV=1
old/young	-0.191	0.353646	0.451431	890.13	0.767	3	11	inferred	P40142	P40142|TKT_MOUSE Transketolase OS=Mus musculus OX=10090 GN=Tkt PE=1 SV=1
old/young	-0.186	0.354645	0.450206	892.64	0.767	3	14	inferred	P63017	P63017|HSP7C_MOUSE Heat shock cognate 71 kDa protein OS=Mus musculus OX=10090 GN=Hspa8 PE=1 SV=1
old/young	-0.268	0.355644	0.448984	895.16	0.767	3	3	inferred	Q8BG05	Q8BG05|ROA3_MOUSE Heterogeneous nuclear ribonucleoprotein A3 OS=Mus musculus OX=10090 GN=Hnrnpa3 PE=1 SV=1
old/young	-0.322	0.347652	0.458855	875.04	0.768	3	1	inferred	rev_Q8K4X7	Q8K4X7|PLCD_MOUSE reversed 1-acyl-sn-glycerol-3-phosphate acyltransferase delta OS=Mus musculus OX=10090 GN=Agpat4 PE=1 SV=1
old/young	-0.318	0.347652	0.458855	875.04	0.768	3	1	inferred	Q8BZ98	Q8BZ98|DYN3_MOUSE Dynamin-3 OS=Mus musculus OX=10090 GN=Dnm3 PE=1 SV=1
old/young	0.216	0.348651	0.457609	877.56	0.768	3	10	inferred	Q8BH59	Q8BH59|CMC1_MOUSE Calcium-binding mitochondrial carrier protein Aralar1 OS=Mus musculus OX=10090 GN=Slc25a12 PE=1 SV=1
old/young	0.288	0.34965	0.456366	880.07	0.768	3	2	inferred	Q91XE8	Q91XE8|TM205_MOUSE Transmembrane protein 205 OS=Mus musculus OX=10090 GN=Tmem205 PE=1 SV=1
old/young	0.275	0.357642	0.446551	900.19	0.769	3	2	inferred	Q9CQ60	Q9CQ60|6PGL_MOUSE 6-phosphogluconolactonase OS=Mus musculus OX=10090 GN=Pgls PE=1 SV=1
old/young	0.253	0.358641	0.44534	902.7	0.77	3	2	inferred	Q61165	Q61165|SL9A1_MOUSE Sodium/hydrogen exchanger 1 OS=Mus musculus OX=10090 GN=Slc9a1 PE=1 SV=1
old/young	0.254	0.35964	0.444132	905.21	0.77	3	4	inferred	Q640R3	Q640R3|HECAM_MOUSE Hepatocyte cell adhesion molecule OS=Mus musculus OX=10090 GN=Hepacam PE=1 SV=2
old/young	0.458	0.361638	0.441726	910.24	0.77	2	1	inferred	Q8K2L8	Q8K2L8|TPC12_MOUSE Trafficking protein particle complex subunit 12 OS=Mus musculus OX=10090 GN=Trappc12 PE=1 SV=2
old/young	0.317	0.362637	0.440527	912.76	0.77	3	1	inferred	Q64105	Q64105|SPRE_MOUSE Sepiapterin reductase OS=Mus musculus OX=10090 GN=Spr PE=1 SV=1
old/young	0.438	0.358641	0.44534	902.7	0.771	2	1	inferred	Q5M8N4	Q5M8N4|D39U1_MOUSE Epimerase family protein SDR39U1 OS=Mus musculus OX=10090 GN=Sdr39u1 PE=1 SV=1
old/young	0.425	0.35964	0.444132	905.21	0.771	2	2	inferred	Q91ZR1	Q91ZR1|RAB4B_MOUSE Ras-related protein Rab-4B OS=Mus musculus OX=10090 GN=Rab4b PE=1 SV=2
old/young	0.338	0.360639	0.442927	907.73	0.771	3	1	inferred	P63242	P63242|IF5A1_MOUSE Eukaryotic translation initiation factor 5A-1 OS=Mus musculus OX=10090 GN=Eif5a PE=1 SV=2
old/young	0.234	0.360639	0.442927	907.73	0.771	3	3	unresolved	A0A1W2P772;G5E829	A0A1W2P772|A0A1W2P772_MOUSE Plasma membrane calcium-transporting ATPase 1 (Fragment) OS=Mus musculus OX=10090 GN=Atp2b1 PE=1 SV=1
old/young	0.327	0.361638	0.441726	910.24	0.771	3	1	inferred	Q99N92	Q99N92|RM27_MOUSE 39S ribosomal protein L27, mitochondrial OS=Mus musculus OX=10090 GN=Mrpl27 PE=1 SV=1
old/young	0.167	0.361638	0.441726	910.24	0.771	3	10	inferred	P28663	P28663|SNAB_MOUSE Beta-soluble NSF attachment protein OS=Mus musculus OX=10090 GN=Napb PE=1 SV=2
old/young	0.334	0.362637	0.440527	912.76	0.771	3	1	inferred	Q3UQ44	Q3UQ44|IQGA2_MOUSE Ras GTPase-activating-like protein IQGAP2 OS=Mus musculus OX=10090 GN=Iqgap2 PE=1 SV=2
old/young	-0.159	0.35964	0.444132	905.21	0.772	3	16	inferred	Q62351	Q62351|TFR1_MOUSE Transferrin receptor protein 1 OS=Mus musculus OX=10090 GN=Tfrc PE=1 SV=1
old/young	0.156	0.360639	0.442927	907.73	0.772	3	15	inferred	Q8R2Y0	Q8R2Y0|ABHD6_MOUSE Monoacylglycerol lipase ABHD6 OS=Mus musculus OX=10090 GN=Abhd6 PE=1 SV=1
old/young	-0.454	0.361638	0.441726	910.24	0.772	2	1	inferred	Q9Z2D3	Q9Z2D3|GSDME_MOUSE Gasdermin-E OS=Mus musculus OX=10090 GN=Gsdme PE=1 SV=1
old/young	0.193	0.362637	0.440527	912.76	0.772	3	8	inferred	Q99L43	Q99L43|CDS2_MOUSE Phosphatidate cytidylyltransferase 2 OS=Mus musculus OX=10090 GN=Cds2 PE=1 SV=1
old/young	0.229	0.363636	0.439333	915.27	0.772	3	5	inferred	Q9R1J0	Q9R1J0|NSDHL_MOUSE Sterol-4-alpha-carboxylate 3-dehydrogenase, decarboxylating OS=Mus musculus OX=10090 GN=Nsdhl PE=1 SV=1
old/young	0.24	0.364635	0.438141	917.79	0.772	3	3	inferred	Q8BLR2	Q8BLR2|CPNE4_MOUSE Copine-4 OS=Mus musculus OX=10090 GN=Cpne4 PE=1 SV=1
old/young	-0.218	0.364635	0.438141	917.79	0.773	3	7	inferred	Q641P0	Q641P0|ARP3B_MOUSE Actin-related protein 3B OS=Mus musculus OX=10090 GN=Actr3b PE=1 SV=1
old/young	0.218	0.364635	0.438141	917.79	0.773	3	5	inferred	O88544	O88544|CSN4_MOUSE COP9 signalosome complex subunit 4 OS=Mus musculus OX=10090 GN=Cops4 PE=1 SV=1
old/young	0.467	0.365634	0.436953	920.3	0.773	2	1	inferred	P23506	P23506|PIMT_MOUSE Protein-L-isoaspartate(D-aspartate) O-methyltransferase OS=Mus musculus OX=10090 GN=Pcmt1 PE=1 SV=3
old/young	0.243	0.365634	0.436953	920.3	0.773	3	5	inferred	Q8BFR5	Q8BFR5|EFTU_MOUSE Elongation factor Tu, mitochondrial OS=Mus musculus OX=10090 GN=Tufm PE=1 SV=1
old/young	-0.647	0.366633	0.435768	922.82	0.774	1	1	inferred	Q7M6Z0	Q7M6Z0|R4RL2_MOUSE Reticulon-4 receptor-like 2 OS=Mus musculus OX=10090 GN=Rtn4rl2 PE=1 SV=1
old/young	0.394	0.366633	0.435768	922.82	0.774	3	1	inferred	P61222	P61222|ABCE1_MOUSE ATP-binding cassette sub-family E member 1 OS=Mus musculus OX=10090 GN=Abce1 PE=1 SV=1
old/young	0.417	0.367632	0.434586	925.33	0.774	2	1	inferred	P63030	P63030|MPC1_MOUSE Mitochondrial pyruvate carrier 1 OS=Mus musculus OX=10090 GN=Mpc1 PE=1 SV=1
old/young	-0.225	0.367632	0.434586	925.33	0.774	3	2	unresolved	A2AGL3;E9Q401;Q80ZZ5	A2AGL3|RYR3_MOUSE Ryanodine receptor 3 OS=Mus musculus OX=10090 GN=Ryr3 PE=1 SV=1
old/young	0.434	0.370629	0.43106	932.87	0.774	2	1	inferred	Q8BV13	Q8BV13|CSN7B_MOUSE COP9 signalosome complex subunit 7b OS=Mus musculus OX=10090 GN=Cops7b PE=1 SV=1
old/young	-0.273	0.371628	0.429891	935.39	0.774	3	2	inferred	Q62059	Q62059|CSPG2_MOUSE Versican core protein OS=Mus musculus OX=10090 GN=Vcan PE=1 SV=2
old/young	0.143	0.371628	0.429891	935.39	0.774	3	35	inferred	S4R1C4	S4R1C4|S4R1C4_MOUSE Calcium-transporting ATPase OS=Mus musculus OX=10090 GN=Atp2b2 PE=1 SV=1
old/young	0.337	0.372627	0.428725	937.9	0.774	3	1	inferred	Q9CQW0	Q9CQW0|EMC6_MOUSE ER membrane protein complex subunit 6 OS=Mus musculus OX=10090 GN=Emc6 PE=1 SV=1
old/young	-0.299	0.372627	0.428725	937.9	0.774	3	1	inferred	O88738	O88738|BIRC6_MOUSE Baculoviral IAP repeat-containing protein 6 OS=Mus musculus OX=10090 GN=Birc6 PE=1 SV=2
old/young	0.22	0.376623	0.424093	947.96	0.774	3	7	unresolved	P60766;P60766-1	P60766|CDC42_MOUSE Cell division control protein 42 homolog OS=Mus musculus OX=10090 GN=Cdc42 PE=1 SV=2
old/young	0.249	0.367632	0.434586	925.33	0.775	3	2	inferred	Q921J2	Q921J2|RHEB_MOUSE GTP-binding protein Rheb OS=Mus musculus OX=10090 GN=Rheb PE=1 SV=1
old/young	-0.22	0.368631	0.433408	927.85	0.775	3	3	inferred	Q921F2	Q921F2|TADBP_MOUSE TAR DNA-binding protein 43 OS=Mus musculus OX=10090 GN=Tardbp PE=1 SV=1
old/young	0.289	0.370629	0.43106	932.87	0.775	3	1	inferred	Q8BJ42	Q8BJ42|DLGP2_MOUSE Disks large-associated protein 2 OS=Mus musculus OX=10090 GN=Dlgap2 PE=1 SV=2
old/young	0.161	0.370629	0.43106	932.87	0.775	3	9	inferred	P61358	P61358|RL27_MOUSE 60S ribosomal protein L27 OS=Mus musculus OX=10090 GN=Rpl27 PE=1 SV=2
old/young	0.235	0.371628	0.429891	935.39	0.775	3	3	inferred	Q9QXY6	Q9QXY6|EHD3_MOUSE EH domain-containing protein 3 OS=Mus musculus OX=10090 GN=Ehd3 PE=1 SV=2
old/young	0.204	0.372627	0.428725	937.9	0.775	3	5	inferred	Q8CHK3	Q8CHK3|MBOA7_MOUSE Lysophospholipid acyltransferase 7 OS=Mus musculus OX=10090 GN=Mboat7 PE=1 SV=1
old/young	0.182	0.373626	0.427562	940.42	0.775	3	10	inferred	Q9DC16	Q9DC16|ERGI1_MOUSE Endoplasmic reticulum-Golgi intermediate compartment protein 1 OS=Mus musculus OX=10090 GN=Ergic1 PE=1 SV=1
old/young	0.472	0.376623	0.424093	947.96	0.775	2	1	inferred	P49769	P49769|PSN1_MOUSE Presenilin-1 OS=Mus musculus OX=10090 GN=Psen1 PE=1 SV=1
old/young	0.337	0.377622	0.422942	950.48	0.775	3	1	inferred	P56391	P56391|CX6B1_MOUSE Cytochrome c oxidase subunit 6B1 OS=Mus musculus OX=10090 GN=Cox6b1 PE=1 SV=2
old/young	-0.294	0.377622	0.422942	950.48	0.775	3	3	inferred	P53995	P53995|APC1_MOUSE Anaphase-promoting complex subunit 1 OS=Mus musculus OX=10090 GN=Anapc1 PE=1 SV=2
old/young	0.314	0.378621	0.421795	952.99	0.775	3	1	inferred	Q8CHU3	Q8CHU3|EPN2_MOUSE Epsin-2 OS=Mus musculus OX=10090 GN=Epn2 PE=1 SV=1
old/young	0.22	0.378621	0.421795	952.99	0.775	3	7	inferred	Q7TPR4	Q7TPR4|ACTN1_MOUSE Alpha-actinin-1 OS=Mus musculus OX=10090 GN=Actn1 PE=1 SV=1
old/young	0.181	0.381618	0.418371	960.53	0.775	3	8	inferred	Q61335	Q61335|BAP31_MOUSE B-cell receptor-associated protein 31 OS=Mus musculus OX=10090 GN=Bcap31 PE=1 SV=4
old/young	0.301	0.382617	0.417235	963.05	0.775	3	1	inferred	Q8CA71	Q8CA71|SHSA4_MOUSE Protein shisa-4 OS=Mus musculus OX=10090 GN=Shisa4 PE=1 SV=1
old/young	-0.251	0.36963	0.432232	930.36	0.776	3	3	unresolved	A2A5R2;G3X9K3	A2A5R2|BIG2_MOUSE Brefeldin A-inhibited guanine nucleotide-exchange protein 2 OS=Mus musculus OX=10090 GN=Arfgef2 PE=1 SV=1
old/young	0.671	0.370629	0.43106	932.87	0.776	1	1	inferred	rev_Q8K1N1	Q8K1N1|PLPL8_MOUSE reversed Calcium-independent phospholipase A2-gamma OS=Mus musculus OX=10090 GN=Pnpla8 PE=1 SV=1
old/young	0.22	0.371628	0.429891	935.39	0.776	3	4	inferred	P61021	P61021|RAB5B_MOUSE Ras-related protein Rab-5B OS=Mus musculus OX=10090 GN=Rab5b PE=1 SV=1
old/young	-0.405	0.375624	0.425246	945.45	0.776	2	1	inferred	Q14DN9	Q14DN9|AKD1B_MOUSE Ankyrin repeat and death domain-containing protein 1B OS=Mus musculus OX=10090 GN=Ankdd1b PE=2 SV=3
old/young	0.204	0.375624	0.425246	945.45	0.776	3	6	inferred	P53994	P53994|RAB2A_MOUSE Ras-related protein Rab-2A OS=Mus musculus OX=10090 GN=Rab2a PE=1 SV=1
old/young	0.371	0.376623	0.424093	947.96	0.776	3	1	inferred	rev_D6RI20	D6RI20|D6RI20_MOUSE reversed Haloacid dehalogenase-like hydrolase domain-containing protein 2 OS=Mus musculus OX=10090 GN=Hdhd2 PE=4 SV=1
old/young	0.203	0.376623	0.424093	947.96	0.776	3	3	inferred	P10853	P10853|H2B1F_MOUSE Histone H2B type 1-F/J/L OS=Mus musculus OX=10090 GN=Hist1h2bf PE=1 SV=2
old/young	-0.308	0.377622	0.422942	950.48	0.776	3	1	unresolved	A2AUK5;P48193;Q9WV92	A2AUK5|A2AUK5_MOUSE Band 4.1-like protein 1 OS=Mus musculus OX=10090 GN=Epb41l1 PE=1 SV=1
old/young	-0.239	0.378621	0.421795	952.99	0.776	3	2	inferred	P24638	P24638|PPAL_MOUSE Lysosomal acid phosphatase OS=Mus musculus OX=10090 GN=Acp2 PE=1 SV=2
old/young	0.291	0.37962	0.42065	955.5	0.776	3	2	inferred	Q69Z26	Q69Z26|CNTN4_MOUSE Contactin-4 OS=Mus musculus OX=10090 GN=Cntn4 PE=1 SV=2
old/young	0.244	0.37962	0.42065	955.5	0.776	3	1	inferred	O88983	O88983|STX8_MOUSE Syntaxin-8 OS=Mus musculus OX=10090 GN=Stx8 PE=1 SV=1
old/young	0.462	0.380619	0.419509	958.02	0.776	2	1	inferred	Q99020	Q99020|ROAA_MOUSE Heterogeneous nuclear ribonucleoprotein A/B OS=Mus musculus OX=10090 GN=Hnrnpab PE=1 SV=1
old/young	0.415	0.380619	0.419509	958.02	0.776	2	1	inferred	Q9CQ06	Q9CQ06|RM24_MOUSE 39S ribosomal protein L24, mitochondrial OS=Mus musculus OX=10090 GN=Mrpl24 PE=1 SV=1
old/young	0.194	0.381618	0.418371	960.53	0.776	3	9	inferred	Q9CVB6	Q9CVB6|ARPC2_MOUSE Actin-related protein 2/3 complex subunit 2 OS=Mus musculus OX=10090 GN=Arpc2 PE=1 SV=3
old/young	0.388	0.382617	0.417235	963.05	0.776	2	1	inferred	Q9CPU4	Q9CPU4|MGST3_MOUSE Microsomal glutathione S-transferase 3 OS=Mus musculus OX=10090 GN=Mgst3 PE=1 SV=1
old/young	0.329	0.36963	0.432232	930.36	0.777	3	1	inferred	Q9CXW2	Q9CXW2|RT22_MOUSE 28S ribosomal protein S22, mitochondrial OS=Mus musculus OX=10090 GN=Mrps22 PE=1 SV=1
old/young	-0.719	0.370629	0.43106	932.87	0.777	1	1	inferred	Q3USQ2	Q3USQ2|Q3USQ2_MOUSE Zinc finger protein 467 OS=Mus musculus OX=10090 GN=Zfp467 PE=1 SV=1
old/young	-0.208	0.370629	0.43106	932.87	0.777	3	5	inferred	Q8R191	Q8R191|SNG3_MOUSE Synaptogyrin-3 OS=Mus musculus OX=10090 GN=Syngr3 PE=1 SV=1
old/young	-0.263	0.374625	0.426403	942.93	0.777	3	2	inferred	P63239	P63239|NEC1_MOUSE Neuroendocrine convertase 1 OS=Mus musculus OX=10090 GN=Pcsk1 PE=1 SV=1
old/young	0.207	0.375624	0.425246	945.45	0.777	3	5	inferred	P62900	P62900|RL31_MOUSE 60S ribosomal protein L31 OS=Mus musculus OX=10090 GN=Rpl31 PE=1 SV=1
old/young	0.276	0.376623	0.424093	947.96	0.777	3	1	inferred	Q61011	Q61011|GBB3_MOUSE Guanine nucleotide-binding protein G(I)/G(S)/G(T) subunit beta-3 OS=Mus musculus OX=10090 GN=Gnb3 PE=1 SV=2
old/young	0.266	0.380619	0.419509	958.02	0.777	3	1	inferred	Q0VBF8	Q0VBF8|STUM_MOUSE Protein stum homolog OS=Mus musculus OX=10090 GN=Stum PE=1 SV=1
old/young	0.23	0.381618	0.418371	960.53	0.777	3	4	inferred	P47955	P47955|RLA1_MOUSE 60S acidic ribosomal protein P1 OS=Mus musculus OX=10090 GN=Rplp1 PE=1 SV=1
old/young	0.169	0.381618	0.418371	960.53	0.777	3	9	inferred	Q99NB9	Q99NB9|SF3B1_MOUSE Splicing factor 3B subunit 1 OS=Mus musculus OX=10090 GN=Sf3b1 PE=1 SV=1
old/young	0.218	0.382617	0.417235	963.05	0.777	3	2	inferred	Q91ZU6	Q91ZU6|DYST_MOUSE Dystonin OS=Mus musculus OX=10090 GN=Dst PE=1 SV=2
old/young	0.206	0.383616	0.416103	965.56	0.777	3	6	inferred	P62196	P62196|PRS8_MOUSE 26S proteasome regulatory subunit 8 OS=Mus musculus OX=10090 GN=Psmc5 PE=1 SV=1
old/young	0.222	0.375624	0.425246	945.45	0.778	3	4	inferred	Q4QQM4	Q4QQM4|P5I11_MOUSE Tumor protein p53-inducible protein 11 OS=Mus musculus OX=10090 GN=Trp53i11 PE=1 SV=1
old/young	0.16	0.375624	0.425246	945.45	0.778	3	13	inferred	Q8R127	Q8R127|SCPDL_MOUSE Saccharopine dehydrogenase-like oxidoreductase OS=Mus musculus OX=10090 GN=Sccpdh PE=1 SV=1
old/young	0.29	0.384615	0.414973	968.08	0.778	3	1	inferred	Q9D8U2	Q9D8U2|TM41A_MOUSE Transmembrane protein 41A OS=Mus musculus OX=10090 GN=Tmem41a PE=2 SV=1
old/young	0.228	0.387612	0.411602	975.62	0.779	3	4	inferred	Q99KV1	Q99KV1|DJB11_MOUSE DnaJ homolog subfamily B member 11 OS=Mus musculus OX=10090 GN=Dnajb11 PE=1 SV=1
old/young	-0.218	0.387612	0.411602	975.62	0.779	3	2	unresolved	P11798;P28652;Q6PHZ2-5;Q923T9	P11798|KCC2A_MOUSE Calcium/calmodulin-dependent protein kinase type II subunit alpha OS=Mus musculus OX=10090 GN=Camk2a PE=1 SV=2
old/young	0.253	0.388611	0.410484	978.13	0.779	3	2	inferred	E9Q7X7	E9Q7X7|NRX2A_MOUSE Neurexin-2 OS=Mus musculus OX=10090 GN=Nrxn2 PE=1 SV=1
old/young	0.254	0.387612	0.411602	975.62	0.78	3	2	inferred	Q9JMK2	Q9JMK2|KC1E_MOUSE Casein kinase I isoform epsilon OS=Mus musculus OX=10090 GN=Csnk1e PE=1 SV=2
old/young	-0.2	0.387612	0.411602	975.62	0.78	3	5	inferred	Q7TPD3	Q7TPD3|ROBO2_MOUSE Roundabout homolog 2 OS=Mus musculus OX=10090 GN=Robo2 PE=1 SV=2
old/young	0.236	0.388611	0.410484	978.13	0.78	3	2	inferred	Q9DC29	Q9DC29|ABCB6_MOUSE ATP-binding cassette sub-family B member 6, mitochondrial OS=Mus musculus OX=10090 GN=Abcb6 PE=1 SV=1
old/young	-0.314	0.38961	0.409369	980.65	0.78	3	1	unresolved	P12382;P47857	P12382|PFKAL_MOUSE ATP-dependent 6-phosphofructokinase, liver type OS=Mus musculus OX=10090 GN=Pfkl PE=1 SV=4
old/young	0.33	0.390609	0.408257	983.16	0.78	3	1	inferred	Q920E5	Q920E5|FPPS_MOUSE Farnesyl pyrophosphate synthase OS=Mus musculus OX=10090 GN=Fdps PE=1 SV=1
old/young	0.355	0.398601	0.399461	1003.28	0.78	3	1	unresolved	Q2NL51;Q9WV60	Q2NL51|GSK3A_MOUSE Glycogen synthase kinase-3 alpha OS=Mus musculus OX=10090 GN=Gsk3a PE=1 SV=2
old/young	0.223	0.398601	0.399461	1003.28	0.78	3	2	unresolved	Q641P0;Q99JY9	Q641P0|ARP3B_MOUSE Actin-related protein 3B OS=Mus musculus OX=10090 GN=Actr3b PE=1 SV=1
old/young	-0.309	0.3996	0.398374	1005.79	0.78	3	1	inferred	P97490	P97490|ADCY8_MOUSE Adenylate cyclase type 8 OS=Mus musculus OX=10090 GN=Adcy8 PE=1 SV=2
old/young	0.231	0.386613	0.412723	973.11	0.781	3	3	inferred	B2RXS4	B2RXS4|PLXB2_MOUSE Plexin-B2 OS=Mus musculus OX=10090 GN=Plxnb2 PE=1 SV=1
old/young	-0.3	0.387612	0.411602	975.62	0.781	2	2	inferred	Q9QXB9	Q9QXB9|DRG2_MOUSE Developmentally-regulated GTP-binding protein 2 OS=Mus musculus OX=10090 GN=Drg2 PE=1 SV=1
old/young	0.229	0.38961	0.409369	980.65	0.781	3	3	inferred	Q4VBD2	Q4VBD2|TAPT1_MOUSE Transmembrane anterior posterior transformation protein 1 OS=Mus musculus OX=10090 GN=Tapt1 PE=1 SV=2
old/young	-0.313	0.390609	0.408257	983.16	0.781	3	2	inferred	Q5XJV6	Q5XJV6|LMTK3_MOUSE Serine/threonine-protein kinase LMTK3 OS=Mus musculus OX=10090 GN=Lmtk3 PE=1 SV=1
old/young	0.262	0.396603	0.401644	998.25	0.781	3	1	inferred	P24549	P24549|AL1A1_MOUSE Retinal dehydrogenase 1 OS=Mus musculus OX=10090 GN=Aldh1a1 PE=1 SV=5
old/young	0.15	0.397602	0.400551	1000.77	0.781	3	20	inferred	P17182	P17182|ENOA_MOUSE Alpha-enolase OS=Mus musculus OX=10090 GN=Eno1 PE=1 SV=3
old/young	0.237	0.398601	0.399461	1003.28	0.781	3	1	unresolved	P29387;P62874;P62880;Q61011	P29387|GBB4_MOUSE Guanine nucleotide-binding protein subunit beta-4 OS=Mus musculus OX=10090 GN=Gnb4 PE=1 SV=4
old/young	0.232	0.398601	0.399461	1003.28	0.781	3	5	inferred	P35486	P35486|ODPA_MOUSE Pyruvate dehydrogenase E1 component subunit alpha, somatic form, mitochondrial OS=Mus musculus OX=10090 GN=Pdha1 PE=1 SV=1
old/young	-0.966	0.3996	0.398374	1005.79	0.781	3	1	inferred	Q8CIG8	Q8CIG8|ANM5_MOUSE Protein arginine N-methyltransferase 5 OS=Mus musculus OX=10090 GN=Prmt5 PE=1 SV=3
old/young	0.313	0.400599	0.39729	1008.31	0.781	3	1	inferred	Q78XF5	Q78XF5|OSTC_MOUSE Oligosaccharyltransferase complex subunit OSTC OS=Mus musculus OX=10090 GN=Ostc PE=1 SV=1
old/young	0.317	0.386613	0.412723	973.11	0.782	3	1	inferred	Q0GNC1	Q0GNC1|INF2_MOUSE Inverted formin-2 OS=Mus musculus OX=10090 GN=Inf2 PE=1 SV=1
old/young	0.325	0.387612	0.411602	975.62	0.782	2	1	inferred	Q9JKK1	Q9JKK1|STX6_MOUSE Syntaxin-6 OS=Mus musculus OX=10090 GN=Stx6 PE=1 SV=1
old/young	0.221	0.387612	0.411602	975.62	0.782	3	4	inferred	Q9JM76	Q9JM76|ARPC3_MOUSE Actin-related protein 2/3 complex subunit 3 OS=Mus musculus OX=10090 GN=Arpc3 PE=1 SV=3
old/young	-0.259	0.390609	0.408257	983.16	0.782	3	1	inferred	Q7TNM2	Q7TNM2|TRI46_MOUSE Tripartite motif-containing protein 46 OS=Mus musculus OX=10090 GN=Trim46 PE=1 SV=1
old/young	0.331	0.391608	0.407148	985.68	0.782	3	1	inferred	G5E870	G5E870|TRIPC_MOUSE E3 ubiquitin-protein ligase TRIP12 OS=Mus musculus OX=10090 GN=Trip12 PE=1 SV=1
old/young	-0.258	0.392607	0.406042	988.19	0.782	3	2	inferred	E9PUC5	E9PUC5|E9PUC5_MOUSE PH and SEC7 domain-containing protein 3 OS=Mus musculus OX=10090 GN=Psd3 PE=1 SV=1
old/young	-0.237	0.392607	0.406042	988.19	0.782	3	1	unresolved	Q14BI2;Q9QYS2	Q14BI2|GRM2_MOUSE Metabotropic glutamate receptor 2 OS=Mus musculus OX=10090 GN=Grm2 PE=1 SV=2
old/young	0.249	0.394605	0.403837	993.22	0.782	3	2	inferred	Q61290	Q61290|CAC1E_MOUSE Voltage-dependent R-type calcium channel subunit alpha-1E OS=Mus musculus OX=10090 GN=Cacna1e PE=1 SV=1
old/young	0.401	0.395604	0.402739	995.74	0.782	2	1	inferred	Q8CFI7	Q8CFI7|RPB2_MOUSE DNA-directed RNA polymerase II subunit RPB2 OS=Mus musculus OX=10090 GN=Polr2b PE=1 SV=2
old/young	-0.316	0.395604	0.402739	995.74	0.782	3	1	inferred	rev_Q9DCM0	Q9DCM0|ETHE1_MOUSE reversed Persulfide dioxygenase ETHE1, mitochondrial OS=Mus musculus OX=10090 GN=Ethe1 PE=1 SV=2
old/young	-0.164	0.396603	0.401644	998.25	0.782	3	12	inferred	Q8C8R3-2	Q8C8R3-2|ANK2_MOUSE Isoform 2 of Ankyrin-2 OS=Mus musculus OX=10090 GN=Ank2
old/young	-0.156	0.396603	0.401644	998.25	0.782	3	13	inferred	P62242	P62242|RS8_MOUSE 40S ribosomal protein S8 OS=Mus musculus OX=10090 GN=Rps8 PE=1 SV=2
old/young	-0.282	0.397602	0.400551	1000.77	0.782	3	2	inferred	Q62504	Q62504|MINT_MOUSE Msx2-interacting protein OS=Mus musculus OX=10090 GN=Spen PE=1 SV=2
old/young	0.267	0.397602	0.400551	1000.77	0.782	3	2	inferred	P97300-3	P97300-3|NPTN_MOUSE Isoform 3 of Neuroplastin OS=Mus musculus OX=10090 GN=Nptn
old/young	0.308	0.398601	0.399461	1003.28	0.782	3	1	unresolved	P50571;P63080;P63137	P50571|GBRB1_MOUSE Gamma-aminobutyric acid receptor subunit beta-1 OS=Mus musculus OX=10090 GN=Gabrb1 PE=1 SV=1
old/young	0.173	0.400599	0.39729	1008.31	0.782	3	7	inferred	Q4VA93	Q4VA93|Q4VA93_MOUSE Protein kinase C OS=Mus musculus OX=10090 GN=Prkca PE=1 SV=1
old/young	0.308	0.401598	0.396208	1010.82	0.782	3	2	inferred	Q61301-3	Q61301-3|CTNA2_MOUSE Isoform 3 of Catenin alpha-2 OS=Mus musculus OX=10090 GN=Ctnna2
old/young	0.223	0.401598	0.396208	1010.82	0.782	3	3	inferred	Q9R0N5	Q9R0N5|SYT5_MOUSE Synaptotagmin-5 OS=Mus musculus OX=10090 GN=Syt5 PE=1 SV=1
old/young	0.463	0.402597	0.395129	1013.34	0.782	1	2	inferred	Q8VHK5	Q8VHK5|MLC1_MOUSE Membrane protein MLC1 OS=Mus musculus OX=10090 GN=Mlc1 PE=1 SV=1
old/young	0.272	0.414585	0.382386	1043.51	0.782	3	1	unresolved	B0F2B4;Q69ZK9;Q99K10	B0F2B4|NLGN4_MOUSE Neuroligin 4-like OS=Mus musculus OX=10090 GN=Nlgn4l PE=1 SV=1
old/young	-0.244	0.415584	0.381341	1046.03	0.782	3	3	inferred	Q9WTK3	Q9WTK3|GPAA1_MOUSE Glycosylphosphatidylinositol anchor attachment 1 protein OS=Mus musculus OX=10090 GN=Gpaa1 PE=1 SV=3
old/young	-0.782	0.420579	0.376152	1058.6	0.782	3	6	inferred	Q8BGN8-2	Q8BGN8-2|SYNPR_MOUSE Isoform 2 of Synaptoporin OS=Mus musculus OX=10090 GN=Synpr
old/young	0.232	0.420579	0.376152	1058.6	0.782	3	2	inferred	P42208	P42208|SEPT2_MOUSE Septin-2 OS=Mus musculus OX=10090 GN=Sept2 PE=1 SV=2
old/young	0.253	0.423576	0.373068	1066.14	0.782	2	2	inferred	Q9CZX0	Q9CZX0|ELP3_MOUSE Elongator complex protein 3 OS=Mus musculus OX=10090 GN=Elp3 PE=1 SV=1
old/young	0.264	0.392607	0.406042	988.19	0.783	3	2	inferred	P55065	P55065|PLTP_MOUSE Phospholipid transfer protein OS=Mus musculus OX=10090 GN=Pltp PE=1 SV=1
old/young	-0.191	0.393606	0.404938	990.71	0.783	3	9	inferred	P42859	P42859|HD_MOUSE Huntingtin OS=Mus musculus OX=10090 GN=Htt PE=1 SV=2
old/young	0.161	0.393606	0.404938	990.71	0.783	3	13	inferred	Q80UM7	Q80UM7|MOGS_MOUSE Mannosyl-oligosaccharide glucosidase OS=Mus musculus OX=10090 GN=Mogs PE=1 SV=1
old/young	0.256	0.394605	0.403837	993.22	0.783	3	2	inferred	Q791V5	Q791V5|MTCH2_MOUSE Mitochondrial carrier homolog 2 OS=Mus musculus OX=10090 GN=Mtch2 PE=1 SV=1
old/young	-0.175	0.394605	0.403837	993.22	0.783	3	17	inferred	Q5SQX6	Q5SQX6|CYFP2_MOUSE Cytoplasmic FMR1-interacting protein 2 OS=Mus musculus OX=10090 GN=Cyfip2 PE=1 SV=2
old/young	-0.331	0.395604	0.402739	995.74	0.783	3	1	inferred	Q8CG64	Q8CG64|FKRP_MOUSE Fukutin-related protein OS=Mus musculus OX=10090 GN=Fkrp PE=1 SV=1
old/young	-0.325	0.395604	0.402739	995.74	0.783	3	1	inferred	Q62288	Q62288|TICN1_MOUSE Testican-1 OS=Mus musculus OX=10090 GN=Spock1 PE=2 SV=2
old/young	0.28	0.396603	0.401644	998.25	0.783	3	1	inferred	Q8R2R9	Q8R2R9|AP3M2_MOUSE AP-3 complex subunit mu-2 OS=Mus musculus OX=10090 GN=Ap3m2 PE=1 SV=1
old/young	-0.349	0.398601	0.399461	1003.28	0.783	3	1	inferred	Q8K2P7	Q8K2P7|S38A1_MOUSE Sodium-coupled neutral amino acid transporter 1 OS=Mus musculus OX=10090 GN=Slc38a1 PE=1 SV=1
old/young	0.365	0.402597	0.395129	1013.34	0.783	3	1	inferred	P09242	P09242|PPBT_MOUSE Alkaline phosphatase, tissue-nonspecific isozyme OS=Mus musculus OX=10090 GN=Alpl PE=1 SV=2
old/young	0.241	0.402597	0.395129	1013.34	0.783	3	1	unresolved	P61205;P84084	P61205|ARF3_MOUSE ADP-ribosylation factor 3 OS=Mus musculus OX=10090 GN=Arf3 PE=2 SV=2
old/young	0.204	0.403596	0.394053	1015.85	0.783	3	5	inferred	Q9D4H1	Q9D4H1|EXOC2_MOUSE Exocyst complex component 2 OS=Mus musculus OX=10090 GN=Exoc2 PE=1 SV=1
old/young	0.218	0.405594	0.391908	1020.88	0.783	3	6	inferred	Q9D1T0	Q9D1T0|LIGO1_MOUSE Leucine-rich repeat and immunoglobulin-like domain-containing nogo receptor-interacting protein 1 OS=Mus musculus OX=10090 GN=Lingo1 PE=1 SV=1
old/young	-0.311	0.411588	0.385537	1035.97	0.783	3	1	unresolved	Q3UHK6;Q9WTS5	Q3UHK6|TEN4_MOUSE Teneurin-4 OS=Mus musculus OX=10090 GN=Tenm4 PE=1 SV=2
old/young	0.242	0.413586	0.383434	1041	0.783	3	1	inferred	Q9D1R9	Q9D1R9|RL34_MOUSE 60S ribosomal protein L34 OS=Mus musculus OX=10090 GN=Rpl34 PE=1 SV=2
old/young	-0.456	0.414585	0.382386	1043.51	0.783	1	1	unresolved	P10649;P48774	P10649|GSTM1_MOUSE Glutathione S-transferase Mu 1 OS=Mus musculus OX=10090 GN=Gstm1 PE=1 SV=2
old/young	-0.196	0.414585	0.382386	1043.51	0.783	3	5	unresolved	G5E8G3;Q6DFY2	G5E8G3|G5E8G3_MOUSE MCG9827 OS=Mus musculus OX=10090 GN=Opcml PE=1 SV=1
old/young	0.289	0.415584	0.381341	1046.03	0.783	3	1	inferred	Q7TNV0	Q7TNV0|DEK_MOUSE Protein DEK OS=Mus musculus OX=10090 GN=Dek PE=1 SV=1
old/young	0.16	0.41958	0.377185	1056.08	0.783	3	8	inferred	B9EJ80	B9EJ80|PDZD8_MOUSE PDZ domain-containing protein 8 OS=Mus musculus OX=10090 GN=Pdzd8 PE=1 SV=1
old/young	-0.521	0.420579	0.376152	1058.6	0.783	1	1	inferred	Q80Z10	Q80Z10|ASTN2_MOUSE Astrotactin-2 OS=Mus musculus OX=10090 GN=Astn2 PE=1 SV=2
old/young	-0.228	0.421578	0.375122	1061.11	0.783	3	2	unresolved	P12382;P47857;Q9WUA3	P12382|PFKAL_MOUSE ATP-dependent 6-phosphofructokinase, liver type OS=Mus musculus OX=10090 GN=Pfkl PE=1 SV=4
old/young	0.218	0.421578	0.375122	1061.11	0.783	3	2	inferred	Q8BVI5	Q8BVI5|STX16_MOUSE Syntaxin-16 OS=Mus musculus OX=10090 GN=Stx16 PE=1 SV=3
old/young	1.651	0.423576	0.373068	1066.14	0.783	3	1	inferred	Q9DBG7	Q9DBG7|SRPRA_MOUSE Signal recognition particle receptor subunit alpha OS=Mus musculus OX=10090 GN=Srpra PE=1 SV=1
old/young	0.18	0.423576	0.373068	1066.14	0.783	3	5	inferred	Q3TDN2	Q3TDN2|FAF2_MOUSE FAS-associated factor 2 OS=Mus musculus OX=10090 GN=Faf2 PE=1 SV=2
old/young	0.271	0.394605	0.403837	993.22	0.784	3	2	inferred	P62812	P62812|GBRA1_MOUSE Gamma-aminobutyric acid receptor subunit alpha-1 OS=Mus musculus OX=10090 GN=Gabra1 PE=1 SV=1
old/young	0.178	0.404595	0.392979	1018.37	0.784	3	9	inferred	P47738	P47738|ALDH2_MOUSE Aldehyde dehydrogenase, mitochondrial OS=Mus musculus OX=10090 GN=Aldh2 PE=1 SV=1
old/young	-0.323	0.405594	0.391908	1020.88	0.784	3	1	inferred	rev_Q14CH7	Q14CH7|SYAM_MOUSE reversed Alanine--tRNA ligase, mitochondrial OS=Mus musculus OX=10090 GN=Aars2 PE=1 SV=1
old/young	0.165	0.406593	0.39084	1023.4	0.784	3	8	inferred	Q99JY0	Q99JY0|ECHB_MOUSE Trifunctional enzyme subunit beta, mitochondrial OS=Mus musculus OX=10090 GN=Hadhb PE=1 SV=1
old/young	-0.155	0.407592	0.389774	1025.91	0.784	3	20	inferred	O08532-5	O08532-5|CA2D1_MOUSE Isoform 2E of Voltage-dependent calcium channel subunit alpha-2/delta-1 OS=Mus musculus OX=10090 GN=Cacna2d1
old/young	-0.246	0.40959	0.38765	1030.94	0.784	3	2	unresolved	P60335;Q61990	P60335|PCBP1_MOUSE Poly(rC)-binding protein 1 OS=Mus musculus OX=10090 GN=Pcbp1 PE=1 SV=1
old/young	0.32	0.410589	0.386592	1033.45	0.784	3	1	inferred	A2AWR3	A2AWR3|A2AWR3_MOUSE G protein-coupled receptor 155 OS=Mus musculus OX=10090 GN=Gpr155 PE=1 SV=1
old/young	0.196	0.410589	0.386592	1033.45	0.784	3	5	inferred	O70172	O70172|PI42A_MOUSE Phosphatidylinositol 5-phosphate 4-kinase type-2 alpha OS=Mus musculus OX=10090 GN=Pip4k2a PE=1 SV=1
old/young	0.375	0.411588	0.385537	1035.97	0.784	2	1	inferred	Q9WUE3	Q9WUE3|C56D2_MOUSE Cytochrome b561 domain-containing protein 2 OS=Mus musculus OX=10090 GN=Cyb561d2 PE=2 SV=1
old/young	0.312	0.411588	0.385537	1035.97	0.784	3	1	inferred	Q60710	Q60710|SAMH1_MOUSE Deoxynucleoside triphosphate triphosphohydrolase SAMHD1 OS=Mus musculus OX=10090 GN=Samhd1 PE=1 SV=2
old/young	-0.164	0.412587	0.384484	1038.48	0.784	3	10	inferred	E9QNN1	E9QNN1|E9QNN1_MOUSE ATP-dependent RNA helicase A OS=Mus musculus OX=10090 GN=Dhx9 PE=1 SV=1
old/young	0.608	0.413586	0.383434	1041	0.784	1	1	inferred	O35089	O35089|CNIH2_MOUSE Protein cornichon homolog 2 OS=Mus musculus OX=10090 GN=Cnih2 PE=1 SV=2
old/young	-0.142	0.413586	0.383434	1041	0.784	3	11	inferred	Q91ZJ5-2	Q91ZJ5-2|UGPA_MOUSE Isoform 2 of UTP--glucose-1-phosphate uridylyltransferase OS=Mus musculus OX=10090 GN=Ugp2
old/young	-0.231	0.414585	0.382386	1043.51	0.784	3	2	inferred	Q6PDS3	Q6PDS3|SARM1_MOUSE Sterile alpha and TIR motif-containing protein 1 OS=Mus musculus OX=10090 GN=Sarm1 PE=1 SV=1
old/young	0.369	0.415584	0.381341	1046.03	0.784	2	1	inferred	Q3UDR8	Q3UDR8|YIPF3_MOUSE Protein YIPF3 OS=Mus musculus OX=10090 GN=Yipf3 PE=1 SV=1
old/young	0.228	0.416583	0.380298	1048.54	0.784	3	2	inferred	Q9CX30	Q9CX30|YIF1B_MOUSE Protein YIF1B OS=Mus musculus OX=10090 GN=Yif1b PE=1 SV=2
old/young	-0.34	0.417582	0.379258	1051.05	0.784	3	1	inferred	Q8R3I2	Q8R3I2|MBOA2_MOUSE Lysophospholipid acyltransferase 2 OS=Mus musculus OX=10090 GN=Mboat2 PE=1 SV=1
old/young	-0.192	0.417582	0.379258	1051.05	0.784	3	7	inferred	P62259	P62259|1433E_MOUSE 14-3-3 protein epsilon OS=Mus musculus OX=10090 GN=Ywhae PE=1 SV=1
old/young	0.164	0.418581	0.37822	1053.57	0.784	3	7	unresolved	P53994;P59279	P53994|RAB2A_MOUSE Ras-related protein Rab-2A OS=Mus musculus OX=10090 GN=Rab2a PE=1 SV=1
old/young	0.25	0.41958	0.377185	1056.08	0.784	3	1	inferred	Q9R1Q7	Q9R1Q7|PLP2_MOUSE Proteolipid protein 2 OS=Mus musculus OX=10090 GN=Plp2 PE=1 SV=1
old/young	0.241	0.420579	0.376152	1058.6	0.784	3	1	inferred	P63154	P63154|CRNL1_MOUSE Crooked neck-like protein 1 OS=Mus musculus OX=10090 GN=Crnkl1 PE=1 SV=1
old/young	0.164	0.420579	0.376152	1058.6	0.784	3	7	inferred	Q7TSH2	Q7TSH2|KPBB_MOUSE Phosphorylase b kinase regulatory subunit beta OS=Mus musculus OX=10090 GN=Phkb PE=1 SV=1
old/young	-0.15	0.422577	0.374094	1063.63	0.784	3	26	inferred	Q91V92	Q91V92|ACLY_MOUSE ATP-citrate synthase OS=Mus musculus OX=10090 GN=Acly PE=1 SV=1
old/young	0.303	0.423576	0.373068	1066.14	0.784	3	1	inferred	A6X919	A6X919|D19L1_MOUSE Probable C-mannosyltransferase DPY19L1 OS=Mus musculus OX=10090 GN=Dpy19l1 PE=1 SV=1
old/young	0.493	0.404595	0.392979	1018.37	0.785	1	1	inferred	A2A699	A2A699|F1712_MOUSE Protein FAM171A2 OS=Mus musculus OX=10090 GN=Fam171a2 PE=1 SV=1
old/young	0.442	0.405594	0.391908	1020.88	0.785	2	1	inferred	Q9CQI6	Q9CQI6|COTL1_MOUSE Coactosin-like protein OS=Mus musculus OX=10090 GN=Cotl1 PE=1 SV=3
old/young	0.267	0.405594	0.391908	1020.88	0.785	3	2	inferred	Q9DBT5	Q9DBT5|AMPD2_MOUSE AMP deaminase 2 OS=Mus musculus OX=10090 GN=Ampd2 PE=1 SV=1
old/young	-0.268	0.406593	0.39084	1023.4	0.785	3	1	inferred	O09172	O09172|GSH0_MOUSE Glutamate--cysteine ligase regulatory subunit OS=Mus musculus OX=10090 GN=Gclm PE=1 SV=1
old/young	0.234	0.407592	0.389774	1025.91	0.785	3	4	inferred	O35465	O35465|FKBP8_MOUSE Peptidyl-prolyl cis-trans isomerase FKBP8 OS=Mus musculus OX=10090 GN=Fkbp8 PE=1 SV=2
old/young	0.287	0.408591	0.388711	1028.42	0.785	3	1	inferred	rev_Q8K019	Q8K019|BCLF1_MOUSE reversed Bcl-2-associated transcription factor 1 OS=Mus musculus OX=10090 GN=Bclaf1 PE=1 SV=2
old/young	0.643	0.40959	0.38765	1030.94	0.785	1	1	inferred	P56371	P56371|RAB4A_MOUSE Ras-related protein Rab-4A OS=Mus musculus OX=10090 GN=Rab4a PE=1 SV=2
old/young	0.211	0.40959	0.38765	1030.94	0.785	3	8	inferred	O70318	O70318|E41L2_MOUSE Band 4.1-like protein 2 OS=Mus musculus OX=10090 GN=Epb41l2 PE=1 SV=2
old/young	-0.238	0.410589	0.386592	1033.45	0.785	3	3	unresolved	B1AXF3;Q8BUN9	B1AXF3|B1AXF3_MOUSE Solute carrier family 24 (sodium/potassium/calcium exchanger), member 2 OS=Mus musculus OX=10090 GN=Slc24a2 PE=1 SV=1
old/young	0.132	0.410589	0.386592	1033.45	0.785	3	25	inferred	Q8BH66	Q8BH66|ATLA1_MOUSE Atlastin-1 OS=Mus musculus OX=10090 GN=Atl1 PE=1 SV=1
old/young	0.326	0.411588	0.385537	1035.97	0.785	3	1	inferred	Q68FD9	Q68FD9|K1549_MOUSE UPF0606 protein KIAA1549 OS=Mus musculus OX=10090 GN=Kiaa1549 PE=1 SV=3
old/young	0.292	0.413586	0.383434	1041	0.785	3	1	inferred	O88736	O88736|DHB7_MOUSE 3-keto-steroid reductase OS=Mus musculus OX=10090 GN=Hsd17b7 PE=1 SV=1
old/young	-0.396	0.414585	0.382386	1043.51	0.785	2	1	inferred	Q61410	Q61410|KGP2_MOUSE cGMP-dependent protein kinase 2 OS=Mus musculus OX=10090 GN=Prkg2 PE=1 SV=1
old/young	-0.284	0.417582	0.379258	1051.05	0.785	3	2	inferred	Q9EQC4	Q9EQC4|ELOV4_MOUSE Elongation of very long chain fatty acids protein 4 OS=Mus musculus OX=10090 GN=Elovl4 PE=1 SV=2
old/young	-0.197	0.418581	0.37822	1053.57	0.785	3	4	inferred	E9QB01	E9QB01|E9QB01_MOUSE Neural cell adhesion molecule 1 OS=Mus musculus OX=10090 GN=Ncam1 PE=1 SV=2
old/young	-0.528	0.41958	0.377185	1056.08	0.785	1	1	inferred	Q99KY4	Q99KY4|GAK_MOUSE Cyclin-G-associated kinase OS=Mus musculus OX=10090 GN=Gak PE=1 SV=2
old/young	-0.523	0.41958	0.377185	1056.08	0.785	1	1	inferred	rev_A2BGH0	A2BGH0|BPIB4_MOUSE reversed BPI fold-containing family B member 4 OS=Mus musculus OX=10090 GN=Bpifb4 PE=2 SV=1
old/young	0.342	0.420579	0.376152	1058.6	0.785	2	1	inferred	Q9DCC8	Q9DCC8|TOM20_MOUSE Mitochondrial import receptor subunit TOM20 homolog OS=Mus musculus OX=10090 GN=Tomm20 PE=1 SV=1
old/young	0.256	0.423576	0.373068	1066.14	0.785	3	3	inferred	Q8K183	Q8K183|PDXK_MOUSE Pyridoxal kinase OS=Mus musculus OX=10090 GN=Pdxk PE=1 SV=1
old/young	-0.254	0.423576	0.373068	1066.14	0.785	2	3	inferred	Q6PHS9	Q6PHS9|CA2D2_MOUSE Voltage-dependent calcium channel subunit alpha-2/delta-2 OS=Mus musculus OX=10090 GN=Cacna2d2 PE=1 SV=1
old/young	0.24	0.425574	0.371024	1071.17	0.785	3	3	inferred	Q99JX4	Q99JX4|EIF3M_MOUSE Eukaryotic translation initiation factor 3 subunit M OS=Mus musculus OX=10090 GN=Eif3m PE=1 SV=1
old/young	0.14	0.407592	0.389774	1025.91	0.786	3	24	inferred	P35564	P35564|CALX_MOUSE Calnexin OS=Mus musculus OX=10090 GN=Canx PE=1 SV=1
old/young	0.348	0.408591	0.388711	1028.42	0.786	2	1	inferred	Q8R1Z9	Q8R1Z9|RN121_MOUSE RING finger protein 121 OS=Mus musculus OX=10090 GN=Rnf121 PE=1 SV=1
old/young	-0.296	0.40959	0.38765	1030.94	0.786	3	1	inferred	P16283	P16283|B3A3_MOUSE Anion exchange protein 3 OS=Mus musculus OX=10090 GN=Slc4a3 PE=1 SV=2
old/young	0.245	0.40959	0.38765	1030.94	0.786	3	3	inferred	Q9Z123	Q9Z123|SEM4F_MOUSE Semaphorin-4F OS=Mus musculus OX=10090 GN=Sema4f PE=1 SV=2
old/young	0.32	0.413586	0.383434	1041	0.786	3	1	inferred	Q9CYL5	Q9CYL5|GAPR1_MOUSE Golgi-associated plant pathogenesis-related protein 1 OS=Mus musculus OX=10090 GN=Glipr2 PE=1 SV=3
old/young	0.171	0.41958	0.377185	1056.08	0.786	3	4	inferred	P62852	P62852|RS25_MOUSE 40S ribosomal protein S25 OS=Mus musculus OX=10090 GN=Rps25 PE=1 SV=1
old/young	0.166	0.42957	0.366966	1081.23	0.786	3	7	unresolved	Q8CI94;Q9WUB3	Q8CI94|PYGB_MOUSE Glycogen phosphorylase, brain form OS=Mus musculus OX=10090 GN=Pygb PE=1 SV=3
old/young	0.287	0.430569	0.365957	1083.74	0.786	3	1	inferred	E9QA62	E9QA62|LMOD3_MOUSE Leiomodin-3 OS=Mus musculus OX=10090 GN=Lmod3 PE=1 SV=1
old/young	-0.269	0.430569	0.365957	1083.74	0.786	3	1	inferred	rev_Q9D0D5	Q9D0D5|T2EA_MOUSE reversed General transcription factor IIE subunit 1 OS=Mus musculus OX=10090 GN=Gtf2e1 PE=1 SV=1
old/young	0.366	0.435564	0.360948	1096.32	0.786	2	1	inferred	Q91YN9	Q91YN9|BAG2_MOUSE BAG family molecular chaperone regulator 2 OS=Mus musculus OX=10090 GN=Bag2 PE=1 SV=1
old/young	0.225	0.435564	0.360948	1096.32	0.786	3	2	inferred	Q8VEH3	Q8VEH3|ARL8A_MOUSE ADP-ribosylation factor-like protein 8A OS=Mus musculus OX=10090 GN=Arl8a PE=1 SV=1
old/young	0.196	0.436563	0.359953	1098.83	0.786	3	4	unresolved	E9PZF0;P15532	E9PZF0|E9PZF0_MOUSE Nucleoside diphosphate kinase OS=Mus musculus OX=10090 GN=Gm20390 PE=3 SV=1
old/young	0.33	0.437562	0.35896	1101.34	0.786	2	1	inferred	Q9D1E8	Q9D1E8|PLCE_MOUSE 1-acyl-sn-glycerol-3-phosphate acyltransferase epsilon OS=Mus musculus OX=10090 GN=Agpat5 PE=2 SV=2
old/young	0.131	0.437562	0.35896	1101.34	0.786	3	24	inferred	Q80VM5	Q80VM5|Q80VM5_MOUSE Dipeptidyl aminopeptidase-like protein 6 OS=Mus musculus OX=10090 GN=Dpp6 PE=1 SV=1
old/young	1.499	0.438561	0.35797	1103.86	0.786	3	1	unresolved	P68368;P68369;P68373	P68368|TBA4A_MOUSE Tubulin alpha-4A chain OS=Mus musculus OX=10090 GN=Tuba4a PE=1 SV=1
old/young	0.212	0.438561	0.35797	1103.86	0.786	3	3	inferred	Q8BYM5	Q8BYM5|NLGN3_MOUSE Neuroligin-3 OS=Mus musculus OX=10090 GN=Nlgn3 PE=1 SV=2
old/young	0.161	0.43956	0.356981	1106.37	0.786	3	5	unresolved	P60764;P63001	P60764|RAC3_MOUSE Ras-related C3 botulinum toxin substrate 3 OS=Mus musculus OX=10090 GN=Rac3 PE=1 SV=1
old/young	-0.226	0.428571	0.367977	1078.71	0.787	3	3	inferred	Q6GV12	Q6GV12|KDSR_MOUSE 3-ketodihydrosphingosine reductase OS=Mus musculus OX=10090 GN=Kdsr PE=1 SV=1
old/young	-0.311	0.42957	0.366966	1081.23	0.787	3	2	unresolved	P29341;Q62029	P29341|PABP1_MOUSE Polyadenylate-binding protein 1 OS=Mus musculus OX=10090 GN=Pabpc1 PE=1 SV=2
old/young	-0.261	0.42957	0.366966	1081.23	0.787	3	1	inferred	Q9QXW9	Q9QXW9|LAT2_MOUSE Large neutral amino acids transporter small subunit 2 OS=Mus musculus OX=10090 GN=Slc7a8 PE=1 SV=1
old/young	-0.226	0.430569	0.365957	1083.74	0.787	3	2	inferred	Q8BFT9	Q8BFT9|SVOP_MOUSE Synaptic vesicle 2-related protein OS=Mus musculus OX=10090 GN=Svop PE=1 SV=1
old/young	-0.186	0.431568	0.36495	1086.26	0.787	3	3	unresolved	P39053;P39053-3;Q8BZ98	P39053|DYN1_MOUSE Dynamin-1 OS=Mus musculus OX=10090 GN=Dnm1 PE=1 SV=2
old/young	0.606	0.432567	0.363946	1088.77	0.787	1	1	inferred	Q61420	Q61420|S35A1_MOUSE CMP-sialic acid transporter OS=Mus musculus OX=10090 GN=Slc35a1 PE=1 SV=2
old/young	0.258	0.432567	0.363946	1088.77	0.787	3	1	inferred	Q06138	Q06138|CAB39_MOUSE Calcium-binding protein 39 OS=Mus musculus OX=10090 GN=Cab39 PE=1 SV=2
old/young	0.226	0.433566	0.362944	1091.29	0.787	3	3	inferred	Q61330	Q61330|CNTN2_MOUSE Contactin-2 OS=Mus musculus OX=10090 GN=Cntn2 PE=1 SV=2
old/young	2.144	0.434565	0.361945	1093.8	0.787	3	3	inferred	P23927	P23927|CRYAB_MOUSE Alpha-crystallin B chain OS=Mus musculus OX=10090 GN=Cryab PE=1 SV=2
old/young	0.239	0.434565	0.361945	1093.8	0.787	3	2	inferred	P31324	P31324|KAP3_MOUSE cAMP-dependent protein kinase type II-beta regulatory subunit OS=Mus musculus OX=10090 GN=Prkar2b PE=1 SV=3
old/young	-0.168	0.435564	0.360948	1096.32	0.787	3	6	inferred	P57759	P57759|ERP29_MOUSE Endoplasmic reticulum resident protein 29 OS=Mus musculus OX=10090 GN=Erp29 PE=1 SV=2
old/young	-0.224	0.436563	0.359953	1098.83	0.787	3	2	unresolved	E9QPE7;Q5SV64;Q61879;Q6URW6-3;Q8VDD5	E9QPE7|E9QPE7_MOUSE Myosin-11 OS=Mus musculus OX=10090 GN=Myh11 PE=1 SV=1
old/young	0.162	0.436563	0.359953	1098.83	0.787	3	8	inferred	Q9WVJ2	Q9WVJ2|PSD13_MOUSE 26S proteasome non-ATPase regulatory subunit 13 OS=Mus musculus OX=10090 GN=Psmd13 PE=1 SV=1
old/young	0.311	0.437562	0.35896	1101.34	0.787	2	1	inferred	P46660	P46660|AINX_MOUSE Alpha-internexin OS=Mus musculus OX=10090 GN=Ina PE=1 SV=3
old/young	-0.138	0.437562	0.35896	1101.34	0.787	3	16	inferred	Q91ZX7	Q91ZX7|LRP1_MOUSE Prolow-density lipoprotein receptor-related protein 1 OS=Mus musculus OX=10090 GN=Lrp1 PE=1 SV=1
old/young	0.406	0.438561	0.35797	1103.86	0.787	2	1	inferred	Q99KX1	Q99KX1|MLF2_MOUSE Myeloid leukemia factor 2 OS=Mus musculus OX=10090 GN=Mlf2 PE=1 SV=1
old/young	-0.305	0.43956	0.356981	1106.37	0.787	2	1	inferred	O35887	O35887|CALU_MOUSE Calumenin OS=Mus musculus OX=10090 GN=Calu PE=1 SV=1
old/young	0.227	0.440559	0.355995	1108.89	0.787	3	4	inferred	Q9D024	Q9D024|CCD47_MOUSE Coiled-coil domain-containing protein 47 OS=Mus musculus OX=10090 GN=Ccdc47 PE=1 SV=2
old/young	-1.37	0.427572	0.36899	1076.2	0.788	3	1	inferred	Q8K1M3	Q8K1M3|Q8K1M3_MOUSE Protein kinase, cAMP dependent regulatory, type II alpha OS=Mus musculus OX=10090 GN=Prkar2a PE=1 SV=1
old/young	-0.183	0.427572	0.36899	1076.2	0.788	3	6	inferred	P42932	P42932|TCPQ_MOUSE T-complex protein 1 subunit theta OS=Mus musculus OX=10090 GN=Cct8 PE=1 SV=3
old/young	0.176	0.428571	0.367977	1078.71	0.788	3	5	inferred	Q9CR62	Q9CR62|M2OM_MOUSE Mitochondrial 2-oxoglutarate/malate carrier protein OS=Mus musculus OX=10090 GN=Slc25a11 PE=1 SV=3
old/young	-0.423	0.42957	0.366966	1081.23	0.788	1	1	inferred	Q61647	Q61647|HYAS1_MOUSE Hyaluronan synthase 1 OS=Mus musculus OX=10090 GN=Has1 PE=1 SV=1
old/young	0.305	0.430569	0.365957	1083.74	0.788	2	1	inferred	Q7SIG6	Q7SIG6|ASAP2_MOUSE Arf-GAP with SH3 domain, ANK repeat and PH domain-containing protein 2 OS=Mus musculus OX=10090 GN=Asap2 PE=1 SV=3
old/young	0.166	0.432567	0.363946	1088.77	0.788	3	6	inferred	P23819-4	P23819-4|GRIA2_MOUSE Isoform 4 of Glutamate receptor 2 OS=Mus musculus OX=10090 GN=Gria2
old/young	0.143	0.432567	0.363946	1088.77	0.788	3	16	inferred	Q8K596	Q8K596|NAC2_MOUSE Sodium/calcium exchanger 2 OS=Mus musculus OX=10090 GN=Slc8a2 PE=1 SV=1
old/young	0.304	0.433566	0.362944	1091.29	0.788	2	1	inferred	P60843	P60843|IF4A1_MOUSE Eukaryotic initiation factor 4A-I OS=Mus musculus OX=10090 GN=Eif4a1 PE=1 SV=1
old/young	-0.259	0.434565	0.361945	1093.8	0.788	3	2	inferred	P59108	P59108|CPNE2_MOUSE Copine-2 OS=Mus musculus OX=10090 GN=Cpne2 PE=1 SV=1
old/young	0.364	0.435564	0.360948	1096.32	0.788	2	1	inferred	Q8BMP6	Q8BMP6|GCP60_MOUSE Golgi resident protein GCP60 OS=Mus musculus OX=10090 GN=Acbd3 PE=1 SV=3
old/young	-0.233	0.435564	0.360948	1096.32	0.788	3	1	inferred	Q8BGQ7	Q8BGQ7|SYAC_MOUSE Alanine--tRNA ligase, cytoplasmic OS=Mus musculus OX=10090 GN=Aars PE=1 SV=1
old/young	0.217	0.440559	0.355995	1108.89	0.788	3	2	inferred	Q921H8	Q921H8|THIKA_MOUSE 3-ketoacyl-CoA thiolase A, peroxisomal OS=Mus musculus OX=10090 GN=Acaa1a PE=1 SV=1
old/young	0.287	0.441558	0.355012	1111.4	0.788	2	3	inferred	P98195	P98195|ATP9B_MOUSE Probable phospholipid-transporting ATPase IIB OS=Mus musculus OX=10090 GN=Atp9b PE=1 SV=4
old/young	0.271	0.441558	0.355012	1111.4	0.788	3	1	inferred	F8VQ23	F8VQ23|F8VQ23_MOUSE Alpha-2B adrenergic receptor OS=Mus musculus OX=10090 GN=Adra2b PE=1 SV=1
old/young	-0.488	0.447552	0.349156	1126.49	0.788	1	1	inferred	Q8K448	Q8K448|ABCA5_MOUSE ATP-binding cassette sub-family A member 5 OS=Mus musculus OX=10090 GN=Abca5 PE=1 SV=2
old/young	-0.456	0.428571	0.367977	1078.71	0.789	3	21	inferred	P15105	P15105|GLNA_MOUSE Glutamine synthetase OS=Mus musculus OX=10090 GN=Glul PE=1 SV=6
old/young	0.153	0.428571	0.367977	1078.71	0.789	3	9	inferred	Q9DB05	Q9DB05|SNAA_MOUSE Alpha-soluble NSF attachment protein OS=Mus musculus OX=10090 GN=Napa PE=1 SV=1
old/young	0.155	0.42957	0.366966	1081.23	0.789	3	14	inferred	P14824	P14824|ANXA6_MOUSE Annexin A6 OS=Mus musculus OX=10090 GN=Anxa6 PE=1 SV=3
old/young	0.224	0.434565	0.361945	1093.8	0.789	3	2	inferred	Q8C996	Q8C996|TM163_MOUSE Transmembrane protein 163 OS=Mus musculus OX=10090 GN=Tmem163 PE=1 SV=1
old/young	0.244	0.442557	0.35403	1113.92	0.789	3	2	inferred	Q6PDI5	Q6PDI5|ECM29_MOUSE Proteasome adapter and scaffold protein ECM29 OS=Mus musculus OX=10090 GN=Ecpas PE=1 SV=3
old/young	-0.241	0.447552	0.349156	1126.49	0.789	3	1	unresolved	A2AUK5;P48193	A2AUK5|A2AUK5_MOUSE Band 4.1-like protein 1 OS=Mus musculus OX=10090 GN=Epb41l1 PE=1 SV=1
old/young	-0.208	0.447552	0.349156	1126.49	0.789	3	2	inferred	Q8C437	Q8C437|PEX5R_MOUSE PEX5-related protein OS=Mus musculus OX=10090 GN=Pex5l PE=1 SV=2
old/young	-0.162	0.443556	0.353051	1116.43	0.79	3	6	inferred	B1AXV0	B1AXV0|FRS1L_MOUSE DOMON domain-containing protein FRRS1L OS=Mus musculus OX=10090 GN=Frrs1l PE=1 SV=1
old/young	0.191	0.445554	0.351099	1121.46	0.79	3	4	inferred	O08989	O08989|RASM_MOUSE Ras-related protein M-Ras OS=Mus musculus OX=10090 GN=Mras PE=1 SV=1
old/young	0.176	0.445554	0.351099	1121.46	0.79	3	5	inferred	P14115	P14115|RL27A_MOUSE 60S ribosomal protein L27a OS=Mus musculus OX=10090 GN=Rpl27a PE=1 SV=5
old/young	0.321	0.446553	0.350127	1123.98	0.79	3	1	inferred	P19324	P19324|SERPH_MOUSE Serpin H1 OS=Mus musculus OX=10090 GN=Serpinh1 PE=1 SV=3
old/young	-0.242	0.446553	0.350127	1123.98	0.79	3	2	inferred	Q9ESF1	Q9ESF1|OTOF_MOUSE Otoferlin OS=Mus musculus OX=10090 GN=Otof PE=1 SV=1
old/young	0.254	0.447552	0.349156	1126.49	0.79	3	1	inferred	Q9ERR7	Q9ERR7|SEP15_MOUSE Selenoprotein F OS=Mus musculus OX=10090 GN=Selenof PE=1 SV=3
old/young	2.312	0.448551	0.348188	1129	0.79	3	1	inferred	P63143	P63143|KCAB1_MOUSE Voltage-gated potassium channel subunit beta-1 OS=Mus musculus OX=10090 GN=Kcnab1 PE=1 SV=2
old/young	0.633	0.444555	0.352074	1118.95	0.791	1	1	inferred	Q8CBX0	Q8CBX0|CSC1_MOUSE Calcium permeable stress-gated cation channel 1 OS=Mus musculus OX=10090 GN=Tmem63c PE=1 SV=1
old/young	0.179	0.444555	0.352074	1118.95	0.791	3	7	inferred	Q80XI4	Q80XI4|PI42B_MOUSE Phosphatidylinositol 5-phosphate 4-kinase type-2 beta OS=Mus musculus OX=10090 GN=Pip4k2b PE=1 SV=1
old/young	0.449	0.445554	0.351099	1121.46	0.791	1	1	inferred	P30999	P30999|CTND1_MOUSE Catenin delta-1 OS=Mus musculus OX=10090 GN=Ctnnd1 PE=1 SV=2
old/young	-0.183	0.445554	0.351099	1121.46	0.791	3	6	inferred	Q7TMB8	Q7TMB8|CYFP1_MOUSE Cytoplasmic FMR1-interacting protein 1 OS=Mus musculus OX=10090 GN=Cyfip1 PE=1 SV=1
old/young	0.166	0.446553	0.350127	1123.98	0.791	3	9	inferred	P61027	P61027|RAB10_MOUSE Ras-related protein Rab-10 OS=Mus musculus OX=10090 GN=Rab10 PE=1 SV=1
old/young	0.28	0.447552	0.349156	1126.49	0.791	3	1	inferred	P60060	P60060|SC61G_MOUSE Protein transport protein Sec61 subunit gamma OS=Mus musculus OX=10090 GN=Sec61g PE=3 SV=1
old/young	-0.224	0.447552	0.349156	1126.49	0.791	3	4	inferred	P54071	P54071|IDHP_MOUSE Isocitrate dehydrogenase [NADP], mitochondrial OS=Mus musculus OX=10090 GN=Idh2 PE=1 SV=3
old/young	-0.268	0.44955	0.347222	1131.52	0.791	3	1	unresolved	Q9CZW4;Q9QUJ7	Q9CZW4|ACSL3_MOUSE Long-chain-fatty-acid--CoA ligase 3 OS=Mus musculus OX=10090 GN=Acsl3 PE=1 SV=2
old/young	-0.2	0.450549	0.346258	1134.03	0.791	3	3	inferred	Q68ED2	Q68ED2|GRM7_MOUSE Metabotropic glutamate receptor 7 OS=Mus musculus OX=10090 GN=Grm7 PE=1 SV=1
old/young	-0.278	0.445554	0.351099	1121.46	0.792	3	1	inferred	Q9D180	Q9D180|CFA57_MOUSE Cilia- and flagella-associated protein 57 OS=Mus musculus OX=10090 GN=Cfap57 PE=1 SV=3
old/young	-0.521	0.450549	0.346258	1134.03	0.792	3	17	inferred	P14211	P14211|CALR_MOUSE Calreticulin OS=Mus musculus OX=10090 GN=Calr PE=1 SV=1
old/young	-0.157	0.451548	0.345296	1136.55	0.793	3	12	inferred	Q99KI0	Q99KI0|ACON_MOUSE Aconitate hydratase, mitochondrial OS=Mus musculus OX=10090 GN=Aco2 PE=1 SV=1
old/young	-0.244	0.454545	0.342423	1144.09	0.794	3	1	inferred	Q7TMS5	Q7TMS5|ABCG2_MOUSE ATP-binding cassette sub-family G member 2 OS=Mus musculus OX=10090 GN=Abcg2 PE=1 SV=1
old/young	0.291	0.455544	0.341469	1146.61	0.794	3	1	inferred	Q8BWT1	Q8BWT1|THIM_MOUSE 3-ketoacyl-CoA thiolase, mitochondrial OS=Mus musculus OX=10090 GN=Acaa2 PE=1 SV=3
old/young	-0.185	0.453546	0.343378	1141.58	0.795	3	4	inferred	P51791	P51791|CLCN3_MOUSE H(+)/Cl(-) exchange transporter 3 OS=Mus musculus OX=10090 GN=Clcn3 PE=1 SV=2
old/young	0.232	0.454545	0.342423	1144.09	0.795	3	1	inferred	O88543	O88543|CSN3_MOUSE COP9 signalosome complex subunit 3 OS=Mus musculus OX=10090 GN=Cops3 PE=1 SV=3
old/young	0.212	0.454545	0.342423	1144.09	0.795	3	2	inferred	P61028	P61028|RAB8B_MOUSE Ras-related protein Rab-8B OS=Mus musculus OX=10090 GN=Rab8b PE=1 SV=1
old/young	0.272	0.455544	0.341469	1146.61	0.795	3	1	inferred	Q8VHQ9	Q8VHQ9|ACO11_MOUSE Acyl-coenzyme A thioesterase 11 OS=Mus musculus OX=10090 GN=Acot11 PE=1 SV=1
old/young	-0.191	0.455544	0.341469	1146.61	0.795	3	9	inferred	Q8QZY1	Q8QZY1|EIF3L_MOUSE Eukaryotic translation initiation factor 3 subunit L OS=Mus musculus OX=10090 GN=Eif3l PE=1 SV=1
old/young	0.231	0.457542	0.339569	1151.63	0.795	3	1	unresolved	Q61548;Q7M6Y3	Q61548|AP180_MOUSE Clathrin coat assembly protein AP180 OS=Mus musculus OX=10090 GN=Snap91 PE=1 SV=1
old/young	0.136	0.457542	0.339569	1151.63	0.795	3	8	inferred	Q8BKZ9	Q8BKZ9|ODPX_MOUSE Pyruvate dehydrogenase protein X component, mitochondrial OS=Mus musculus OX=10090 GN=Pdhx PE=1 SV=1
old/young	0.181	0.453546	0.343378	1141.58	0.796	3	3	inferred	P09055	P09055|ITB1_MOUSE Integrin beta-1 OS=Mus musculus OX=10090 GN=Itgb1 PE=1 SV=1
old/young	0.21	0.454545	0.342423	1144.09	0.796	3	2	inferred	Q9JJY3	Q9JJY3|NSMA2_MOUSE Sphingomyelin phosphodiesterase 3 OS=Mus musculus OX=10090 GN=Smpd3 PE=1 SV=1
old/young	0.185	0.454545	0.342423	1144.09	0.796	3	5	inferred	P00920	P00920|CAH2_MOUSE Carbonic anhydrase 2 OS=Mus musculus OX=10090 GN=Ca2 PE=1 SV=4
old/young	-0.295	0.457542	0.339569	1151.63	0.796	3	1	inferred	Q7TSK2	Q7TSK2|SEZ6_MOUSE Seizure protein 6 OS=Mus musculus OX=10090 GN=Sez6 PE=1 SV=1
old/young	0.139	0.457542	0.339569	1151.63	0.796	3	8	inferred	P14131	P14131|RS16_MOUSE 40S ribosomal protein S16 OS=Mus musculus OX=10090 GN=Rps16 PE=1 SV=4
old/young	0.201	0.458541	0.338621	1154.15	0.796	3	3	inferred	Q925N0	Q925N0|SFXN5_MOUSE Sideroflexin-5 OS=Mus musculus OX=10090 GN=Sfxn5 PE=1 SV=2
old/young	-0.201	0.45954	0.337676	1156.66	0.796	3	2	inferred	Q61879	Q61879|MYH10_MOUSE Myosin-10 OS=Mus musculus OX=10090 GN=Myh10 PE=1 SV=2
old/young	-0.196	0.45954	0.337676	1156.66	0.796	3	2	unresolved	P39053;P39053-3;P39054;Q8BZ98	P39053|DYN1_MOUSE Dynamin-1 OS=Mus musculus OX=10090 GN=Dnm1 PE=1 SV=2
old/young	0.252	0.464535	0.332981	1169.24	0.796	3	1	inferred	Q8BG67	Q8BG67|EFR3A_MOUSE Protein EFR3 homolog A OS=Mus musculus OX=10090 GN=Efr3a PE=1 SV=1
old/young	0.284	0.457542	0.339569	1151.63	0.797	3	1	inferred	Q64737	Q64737|PUR2_MOUSE Trifunctional purine biosynthetic protein adenosine-3 OS=Mus musculus OX=10090 GN=Gart PE=1 SV=3
old/young	0.276	0.45954	0.337676	1156.66	0.797	3	1	inferred	Q8BH95	Q8BH95|ECHM_MOUSE Enoyl-CoA hydratase, mitochondrial OS=Mus musculus OX=10090 GN=Echs1 PE=1 SV=1
old/young	0.275	0.45954	0.337676	1156.66	0.797	2	2	inferred	P51660	P51660|DHB4_MOUSE Peroxisomal multifunctional enzyme type 2 OS=Mus musculus OX=10090 GN=Hsd17b4 PE=1 SV=3
old/young	0.237	0.460539	0.336733	1159.18	0.797	3	1	inferred	Q9D8B1-2	Q9D8B1-2|AIG1_MOUSE Isoform 2 of Androgen-induced gene 1 protein OS=Mus musculus OX=10090 GN=Aig1
old/young	0.207	0.461538	0.335792	1161.69	0.797	3	3	inferred	P12023	P12023|A4_MOUSE Amyloid-beta A4 protein OS=Mus musculus OX=10090 GN=App PE=1 SV=3
old/young	0.14	0.461538	0.335792	1161.69	0.797	3	12	inferred	Q91V14	Q91V14|S12A5_MOUSE Solute carrier family 12 member 5 OS=Mus musculus OX=10090 GN=Slc12a5 PE=1 SV=2
old/young	0.21	0.462537	0.334853	1164.21	0.797	3	2	inferred	P97772	P97772|GRM1_MOUSE Metabotropic glutamate receptor 1 OS=Mus musculus OX=10090 GN=Grm1 PE=1 SV=2
old/young	0.186	0.462537	0.334853	1164.21	0.797	3	5	inferred	Q8R0J2	Q8R0J2|Q8R0J2_MOUSE Mannose-P-dolichol utilization defect 1 OS=Mus musculus OX=10090 GN=Mpdu1 PE=1 SV=1
old/young	0.227	0.463536	0.333916	1166.72	0.797	3	1	unresolved	G5E829;Q0VF55	G5E829|AT2B1_MOUSE Plasma membrane calcium-transporting ATPase 1 OS=Mus musculus OX=10090 GN=Atp2b1 PE=1 SV=1
old/young	0.168	0.463536	0.333916	1166.72	0.797	3	5	inferred	D3YZZ5	D3YZZ5|D3YZZ5_MOUSE Transmembrane p24-trafficking protein 7 OS=Mus musculus OX=10090 GN=Tmed7 PE=1 SV=1
old/young	0.167	0.464535	0.332981	1169.24	0.797	3	6	inferred	Q9Z2Q6	Q9Z2Q6|SEPT5_MOUSE Septin-5 OS=Mus musculus OX=10090 GN=Sept5 PE=1 SV=2
old/young	-0.237	0.465534	0.332048	1171.75	0.797	3	1	inferred	Q9ES34	Q9ES34|UBE3B_MOUSE Ubiquitin-protein ligase E3B OS=Mus musculus OX=10090 GN=Ube3b PE=1 SV=3
old/young	0.149	0.461538	0.335792	1161.69	0.798	3	7	unresolved	P23818;Q7TNB5	P23818|GRIA1_MOUSE Glutamate receptor 1 OS=Mus musculus OX=10090 GN=Gria1 PE=1 SV=1
old/young	0.192	0.462537	0.334853	1164.21	0.798	3	2	unresolved	A0A0R4J2C2;P46096;Q9R0N5	A0A0R4J2C2|A0A0R4J2C2_MOUSE Synaptotagmin II OS=Mus musculus OX=10090 GN=Syt2 PE=1 SV=1
old/young	0.212	0.463536	0.333916	1166.72	0.798	3	2	inferred	P28658	P28658|ATX10_MOUSE Ataxin-10 OS=Mus musculus OX=10090 GN=Atxn10 PE=1 SV=2
old/young	0.186	0.464535	0.332981	1169.24	0.798	3	5	inferred	P60229	P60229|EIF3E_MOUSE Eukaryotic translation initiation factor 3 subunit E OS=Mus musculus OX=10090 GN=Eif3e PE=1 SV=1
old/young	-0.157	0.464535	0.332981	1169.24	0.798	3	5	inferred	P80314	P80314|TCPB_MOUSE T-complex protein 1 subunit beta OS=Mus musculus OX=10090 GN=Cct2 PE=1 SV=4
old/young	-0.233	0.465534	0.332048	1171.75	0.798	3	1	unresolved	Q6R0H7;Q8CGK7	Q6R0H7|GNAS1_MOUSE Guanine nucleotide-binding protein G(s) subunit alpha isoforms XLas OS=Mus musculus OX=10090 GN=Gnas PE=1 SV=1
old/young	0.176	0.466533	0.331117	1174.26	0.798	3	3	inferred	Q8BRU6	Q8BRU6|VMAT2_MOUSE Synaptic vesicular amine transporter OS=Mus musculus OX=10090 GN=Slc18a2 PE=1 SV=1
old/young	0.171	0.466533	0.331117	1174.26	0.798	3	4	inferred	D3Z230	D3Z230|D3Z230_MOUSE Type I inositol 3,4-bisphosphate 4-phosphatase OS=Mus musculus OX=10090 GN=Inpp4a PE=1 SV=1
old/young	0.228	0.468531	0.329261	1179.29	0.801	3	1	unresolved	P59108;Q0VE82;Q1RLL3;Q8BLR2;Q8BT60;Q8JZW4;Q9Z140	P59108|CPNE2_MOUSE Copine-2 OS=Mus musculus OX=10090 GN=Cpne2 PE=1 SV=1
old/young	0.209	0.471528	0.326492	1186.84	0.801	3	1	inferred	Q9D882	Q9D882|F241B_MOUSE Uncharacterized protein FAM241B OS=Mus musculus OX=10090 GN=Fam241b PE=1 SV=1
old/young	-0.18	0.473526	0.324656	1191.87	0.801	3	3	inferred	Q7M759	Q7M759|AB17B_MOUSE Alpha/beta hydrolase domain-containing protein 17B OS=Mus musculus OX=10090 GN=Abhd17b PE=1 SV=1
old/young	0.158	0.46953	0.328336	1181.81	0.802	3	5	inferred	Q5PR73	Q5PR73|DIRA2_MOUSE GTP-binding protein Di-Ras2 OS=Mus musculus OX=10090 GN=Diras2 PE=1 SV=1
old/young	0.193	0.470529	0.327413	1184.32	0.802	3	2	unresolved	P23818;P23819-3;Q7TNB5	P23818|GRIA1_MOUSE Glutamate receptor 1 OS=Mus musculus OX=10090 GN=Gria1 PE=1 SV=1
old/young	0.192	0.470529	0.327413	1184.32	0.802	3	3	inferred	Q02248	Q02248|CTNB1_MOUSE Catenin beta-1 OS=Mus musculus OX=10090 GN=Ctnnb1 PE=1 SV=1
old/young	0.323	0.471528	0.326492	1186.84	0.802	2	2	inferred	A2AAE1	A2AAE1|K1109_MOUSE Uncharacterized protein KIAA1109 OS=Mus musculus OX=10090 GN=Kiaa1109 PE=1 SV=4
old/young	-0.134	0.471528	0.326492	1186.84	0.802	3	11	inferred	Q6PGJ3	Q6PGJ3|Q6PGJ3_MOUSE L1 cell adhesion molecule OS=Mus musculus OX=10090 GN=L1cam PE=1 SV=1
old/young	-0.214	0.472527	0.325573	1189.35	0.802	3	2	inferred	Q91WQ3	Q91WQ3|SYYC_MOUSE Tyrosine--tRNA ligase, cytoplasmic OS=Mus musculus OX=10090 GN=Yars PE=1 SV=3
old/young	0.247	0.473526	0.324656	1191.87	0.802	3	1	inferred	Q6ZPJ0	Q6ZPJ0|TEX2_MOUSE Testis-expressed protein 2 OS=Mus musculus OX=10090 GN=Tex2 PE=1 SV=2
old/young	-0.148	0.473526	0.324656	1191.87	0.802	3	16	inferred	O70503	O70503|DHB12_MOUSE Very-long-chain 3-oxoacyl-CoA reductase OS=Mus musculus OX=10090 GN=Hsd17b12 PE=1 SV=1
old/young	-0.337	0.475524	0.322827	1196.9	0.802	2	1	inferred	rev_E9PZ16	E9PZ16|E9PZ16_MOUSE reversed Basement membrane-specific heparan sulfate proteoglycan core protein OS=Mus musculus OX=10090 GN=Hspg2 PE=1 SV=1
old/young	0.127	0.478521	0.320099	1204.44	0.802	3	19	inferred	Q91V41	Q91V41|RAB14_MOUSE Ras-related protein Rab-14 OS=Mus musculus OX=10090 GN=Rab14 PE=1 SV=3
old/young	-0.111	0.470529	0.327413	1184.32	0.803	3	32	inferred	Q8VDN2	Q8VDN2|AT1A1_MOUSE Sodium/potassium-transporting ATPase subunit alpha-1 OS=Mus musculus OX=10090 GN=Atp1a1 PE=1 SV=1
old/young	0.153	0.471528	0.326492	1186.84	0.803	3	8	inferred	P26516	P26516|PSMD7_MOUSE 26S proteasome non-ATPase regulatory subunit 7 OS=Mus musculus OX=10090 GN=Psmd7 PE=1 SV=2
old/young	0.231	0.472527	0.325573	1189.35	0.803	3	2	inferred	Q8JZR6	Q8JZR6|S4A8_MOUSE Electroneutral sodium bicarbonate exchanger 1 OS=Mus musculus OX=10090 GN=Slc4a8 PE=2 SV=1
old/young	-0.233	0.473526	0.324656	1191.87	0.803	3	2	inferred	Q8VCM8	Q8VCM8|NCLN_MOUSE Nicalin OS=Mus musculus OX=10090 GN=Ncln PE=1 SV=2
old/young	-0.219	0.473526	0.324656	1191.87	0.803	3	2	inferred	Q9JKV5	Q9JKV5|SCAM4_MOUSE Secretory carrier-associated membrane protein 4 OS=Mus musculus OX=10090 GN=Scamp4 PE=1 SV=1
old/young	-0.219	0.475524	0.322827	1196.9	0.803	3	2	inferred	Q9WTI7	Q9WTI7|MYO1C_MOUSE Unconventional myosin-Ic OS=Mus musculus OX=10090 GN=Myo1c PE=1 SV=2
old/young	0.138	0.475524	0.322827	1196.9	0.803	3	10	inferred	A0A0R4J2C2	A0A0R4J2C2|A0A0R4J2C2_MOUSE Synaptotagmin II OS=Mus musculus OX=10090 GN=Syt2 PE=1 SV=1
old/young	0.299	0.476523	0.321916	1199.41	0.803	3	1	inferred	Q9QVP9	Q9QVP9|FAK2_MOUSE Protein-tyrosine kinase 2-beta OS=Mus musculus OX=10090 GN=Ptk2b PE=1 SV=2
old/young	-0.127	0.476523	0.321916	1199.41	0.803	3	14	inferred	Q8BG39	Q8BG39|SV2B_MOUSE Synaptic vesicle glycoprotein 2B OS=Mus musculus OX=10090 GN=Sv2b PE=1 SV=1
old/young	0.216	0.477522	0.321006	1201.92	0.803	3	2	inferred	Q921T2	Q921T2|TOIP1_MOUSE Torsin-1A-interacting protein 1 OS=Mus musculus OX=10090 GN=Tor1aip1 PE=1 SV=3
old/young	0.146	0.477522	0.321006	1201.92	0.803	3	8	inferred	Q9D1G1	Q9D1G1|RAB1B_MOUSE Ras-related protein Rab-1B OS=Mus musculus OX=10090 GN=Rab1b PE=1 SV=1
old/young	-0.547	0.478521	0.320099	1204.44	0.803	3	11	inferred	P62874	P62874|GBB1_MOUSE Guanine nucleotide-binding protein G(I)/G(S)/G(T) subunit beta-1 OS=Mus musculus OX=10090 GN=Gnb1 PE=1 SV=3
old/young	-0.192	0.478521	0.320099	1204.44	0.803	3	4	inferred	Q56A07	Q56A07|SCN2B_MOUSE Sodium channel subunit beta-2 OS=Mus musculus OX=10090 GN=Scn2b PE=1 SV=1
old/young	-0.642	0.47952	0.319193	1206.95	0.803	3	8	inferred	P62880	P62880|GBB2_MOUSE Guanine nucleotide-binding protein G(I)/G(S)/G(T) subunit beta-2 OS=Mus musculus OX=10090 GN=Gnb2 PE=1 SV=3
old/young	0.251	0.475524	0.322827	1196.9	0.804	3	2	inferred	Q9DC71	Q9DC71|RT15_MOUSE 28S ribosomal protein S15, mitochondrial OS=Mus musculus OX=10090 GN=Mrps15 PE=1 SV=2
old/young	-0.135	0.477522	0.321006	1201.92	0.804	3	8	inferred	O08795	O08795|GLU2B_MOUSE Glucosidase 2 subunit beta OS=Mus musculus OX=10090 GN=Prkcsh PE=1 SV=1
old/young	0.132	0.478521	0.320099	1204.44	0.804	3	6	unresolved	E9Q828;G5E829;Q0VF55;S4R1C4	E9Q828|E9Q828_MOUSE Calcium-transporting ATPase OS=Mus musculus OX=10090 GN=Atp2b4 PE=1 SV=1
old/young	0.143	0.47952	0.319193	1206.95	0.804	3	8	inferred	Q9R0N7	Q9R0N7|SYT7_MOUSE Synaptotagmin-7 OS=Mus musculus OX=10090 GN=Syt7 PE=1 SV=1
old/young	-0.137	0.480519	0.318289	1209.47	0.804	3	7	inferred	Q60714	Q60714|S27A1_MOUSE Long-chain fatty acid transport protein 1 OS=Mus musculus OX=10090 GN=Slc27a1 PE=1 SV=1
old/young	-0.17	0.481518	0.317387	1211.98	0.805	3	5	inferred	Q8R464	Q8R464|CADM4_MOUSE Cell adhesion molecule 4 OS=Mus musculus OX=10090 GN=Cadm4 PE=1 SV=1
old/young	-0.141	0.481518	0.317387	1211.98	0.805	3	10	inferred	P25444	P25444|RS2_MOUSE 40S ribosomal protein S2 OS=Mus musculus OX=10090 GN=Rps2 PE=1 SV=3
old/young	0.138	0.482517	0.316487	1214.5	0.805	3	8	inferred	P07901	P07901|HS90A_MOUSE Heat shock protein HSP 90-alpha OS=Mus musculus OX=10090 GN=Hsp90aa1 PE=1 SV=4
old/young	-0.123	0.482517	0.316487	1214.5	0.806	3	17	inferred	P14685	P14685|PSMD3_MOUSE 26S proteasome non-ATPase regulatory subunit 3 OS=Mus musculus OX=10090 GN=Psmd3 PE=1 SV=3
old/young	0.257	0.483516	0.315589	1217.01	0.806	3	1	inferred	Q52KR3	Q52KR3|PRUN2_MOUSE Protein prune homolog 2 OS=Mus musculus OX=10090 GN=Prune2 PE=1 SV=2
old/young	0.235	0.4995	0.301464	1257.24	0.806	2	2	inferred	Q8BHN0	Q8BHN0|PPM1L_MOUSE Protein phosphatase 1L OS=Mus musculus OX=10090 GN=Ppm1l PE=1 SV=1
old/young	0.133	0.4995	0.301464	1257.24	0.806	3	10	inferred	Q9WUQ2	Q9WUQ2|PREB_MOUSE Prolactin regulatory element-binding protein OS=Mus musculus OX=10090 GN=Preb PE=1 SV=1
old/young	0.299	0.501499	0.29973	1262.27	0.806	2	1	inferred	rev_Q3V1C1	Q3V1C1|Q3V1C1_MOUSE reversed Zinc finger protein 142 OS=Mus musculus OX=10090 GN=Zfp142 PE=2 SV=1
old/young	0.329	0.503497	0.298004	1267.3	0.806	2	1	inferred	A0A0B4J1H7	A0A0B4J1H7|A0A0B4J1H7_MOUSE Immunoglobulin kappa variable 1-135 (Fragment) OS=Mus musculus OX=10090 GN=Igkv1-135 PE=4 SV=1
old/young	-0.269	0.504496	0.297143	1269.82	0.806	2	1	inferred	rev_P28653	P28653|PGS1_MOUSE reversed Biglycan OS=Mus musculus OX=10090 GN=Bgn PE=1 SV=1
old/young	0.153	0.504496	0.297143	1269.82	0.806	3	4	inferred	Q8BP67	Q8BP67|RL24_MOUSE 60S ribosomal protein L24 OS=Mus musculus OX=10090 GN=Rpl24 PE=1 SV=2
old/young	0.251	0.505495	0.296284	1272.33	0.806	3	1	inferred	rev_P70211	P70211|DCC_MOUSE reversed Netrin receptor DCC OS=Mus musculus OX=10090 GN=Dcc PE=1 SV=2
old/young	0.157	0.509491	0.292864	1282.39	0.806	3	4	inferred	Q62318	Q62318|TIF1B_MOUSE Transcription intermediary factor 1-beta OS=Mus musculus OX=10090 GN=Trim28 PE=1 SV=3
old/young	-0.138	0.483516	0.315589	1217.01	0.807	3	13	inferred	P06151	P06151|LDHA_MOUSE L-lactate dehydrogenase A chain OS=Mus musculus OX=10090 GN=Ldha PE=1 SV=3
old/young	0.17	0.484515	0.314692	1219.53	0.807	3	6	inferred	P18760	P18760|COF1_MOUSE Cofilin-1 OS=Mus musculus OX=10090 GN=Cfl1 PE=1 SV=3
old/young	0.207	0.486513	0.312905	1224.55	0.807	3	2	inferred	O54901	O54901|OX2G_MOUSE OX-2 membrane glycoprotein OS=Mus musculus OX=10090 GN=Cd200 PE=1 SV=1
old/young	-0.279	0.498501	0.302334	1254.73	0.807	3	1	inferred	P97372	P97372|PSME2_MOUSE Proteasome activator complex subunit 2 OS=Mus musculus OX=10090 GN=Psme2 PE=1 SV=4
old/young	0.44	0.4995	0.301464	1257.24	0.807	1	1	inferred	P47759	P47759|NSG2_MOUSE Neuronal vesicle trafficking-associated protein 2 OS=Mus musculus OX=10090 GN=Nsg2 PE=1 SV=1
old/young	0.122	0.4995	0.301464	1257.24	0.807	3	14	inferred	Q99PU5	Q99PU5|ACBG1_MOUSE Long-chain-fatty-acid--CoA ligase ACSBG1 OS=Mus musculus OX=10090 GN=Acsbg1 PE=1 SV=1
old/young	2.198	0.5005	0.300596	1259.76	0.807	2	1	inferred	Q80WJ7	Q80WJ7|LYRIC_MOUSE Protein LYRIC OS=Mus musculus OX=10090 GN=Mtdh PE=1 SV=1
old/young	0.333	0.5005	0.300596	1259.76	0.807	2	1	inferred	Q8BP47	Q8BP47|SYNC_MOUSE Asparagine--tRNA ligase, cytoplasmic OS=Mus musculus OX=10090 GN=Nars PE=1 SV=2
old/young	-0.281	0.501499	0.29973	1262.27	0.807	3	1	inferred	Q9CYT6	Q9CYT6|CAP2_MOUSE Adenylyl cyclase-associated protein 2 OS=Mus musculus OX=10090 GN=Cap2 PE=1 SV=1
old/young	0.238	0.501499	0.29973	1262.27	0.807	3	1	inferred	Q9JJE7	Q9JJE7|FADS3_MOUSE Fatty acid desaturase 3 OS=Mus musculus OX=10090 GN=Fads3 PE=2 SV=2
old/young	0.172	0.502498	0.298866	1264.79	0.807	3	4	inferred	Q91WA3	Q91WA3|HDA11_MOUSE Histone deacetylase 11 OS=Mus musculus OX=10090 GN=Hdac11 PE=1 SV=1
old/young	0.144	0.502498	0.298866	1264.79	0.807	3	10	inferred	Q9CRY7	Q9CRY7|GDPD1_MOUSE Lysophospholipase D GDPD1 OS=Mus musculus OX=10090 GN=Gdpd1 PE=1 SV=1
old/young	-0.37	0.503497	0.298004	1267.3	0.807	2	1	inferred	Q8BHT6	Q8BHT6|B3GLT_MOUSE Beta-1,3-glucosyltransferase OS=Mus musculus OX=10090 GN=B3glct PE=1 SV=3
old/young	0.281	0.503497	0.298004	1267.3	0.807	3	1	inferred	Q9DD18	Q9DD18|DTD1_MOUSE D-aminoacyl-tRNA deacylase 1 OS=Mus musculus OX=10090 GN=Dtd1 PE=1 SV=2
old/young	0.332	0.504496	0.297143	1269.82	0.807	2	1	inferred	Q8BH78	Q8BH78|Q8BH78_MOUSE Reticulon OS=Mus musculus OX=10090 GN=Rtn4 PE=1 SV=1
old/young	-0.297	0.504496	0.297143	1269.82	0.807	2	1	inferred	rev_Q9Z315	Q9Z315|SNUT1_MOUSE reversed U4/U6.U5 tri-snRNP-associated protein 1 OS=Mus musculus OX=10090 GN=Sart1 PE=1 SV=1
old/young	0.154	0.505495	0.296284	1272.33	0.807	3	5	inferred	P40124	P40124|CAP1_MOUSE Adenylyl cyclase-associated protein 1 OS=Mus musculus OX=10090 GN=Cap1 PE=1 SV=4
old/young	0.315	0.506494	0.295426	1274.84	0.807	2	1	inferred	Q14CH0	Q14CH0|F171B_MOUSE Protein FAM171B OS=Mus musculus OX=10090 GN=Fam171b PE=1 SV=2
old/young	-0.133	0.506494	0.295426	1274.84	0.807	3	16	inferred	P46735	P46735|MYO1B_MOUSE Unconventional myosin-Ib OS=Mus musculus OX=10090 GN=Myo1b PE=1 SV=3
old/young	0.219	0.507493	0.29457	1277.36	0.807	3	1	inferred	rev_P39655	P39655|LOX12_MOUSE reversed Arachidonate 12-lipoxygenase, 12S-type OS=Mus musculus OX=10090 GN=Alox12 PE=1 SV=4
old/young	0.166	0.507493	0.29457	1277.36	0.807	3	3	unresolved	O70172;Q80XI4	O70172|PI42A_MOUSE Phosphatidylinositol 5-phosphate 4-kinase type-2 alpha OS=Mus musculus OX=10090 GN=Pip4k2a PE=1 SV=1
old/young	-0.189	0.508492	0.293716	1279.87	0.807	3	2	inferred	Q6PDL0	Q6PDL0|DC1L2_MOUSE Cytoplasmic dynein 1 light intermediate chain 2 OS=Mus musculus OX=10090 GN=Dync1li2 PE=1 SV=2
old/young	0.182	0.509491	0.292864	1282.39	0.807	3	3	inferred	P55302	P55302|AMRP_MOUSE Alpha-2-macroglobulin receptor-associated protein OS=Mus musculus OX=10090 GN=Lrpap1 PE=1 SV=1
old/young	-0.141	0.509491	0.292864	1282.39	0.807	3	9	inferred	Q9JLN9	Q9JLN9|MTOR_MOUSE Serine/threonine-protein kinase mTOR OS=Mus musculus OX=10090 GN=Mtor PE=1 SV=2
old/young	0.147	0.51049	0.292013	1284.9	0.807	3	8	inferred	Q8K4X7	Q8K4X7|PLCD_MOUSE 1-acyl-sn-glycerol-3-phosphate acyltransferase delta OS=Mus musculus OX=10090 GN=Agpat4 PE=1 SV=1
old/young	-0.245	0.485514	0.313798	1222.04	0.808	3	1	inferred	rev_Q61087	Q61087|LAMB3_MOUSE reversed Laminin subunit beta-3 OS=Mus musculus OX=10090 GN=Lamb3 PE=1 SV=2
old/young	0.235	0.485514	0.313798	1222.04	0.808	3	1	inferred	Q80ZP8	Q80ZP8|Q80ZP8_MOUSE Armet protein OS=Mus musculus OX=10090 GN=Manf PE=1 SV=1
old/young	0.538	0.486513	0.312905	1224.55	0.808	1	1	inferred	Q8CAQ8	Q8CAQ8|MIC60_MOUSE MICOS complex subunit Mic60 OS=Mus musculus OX=10090 GN=Immt PE=1 SV=1
old/young	0.233	0.486513	0.312905	1224.55	0.808	3	1	inferred	O54865	O54865|GCYB1_MOUSE Guanylate cyclase soluble subunit beta-1 OS=Mus musculus OX=10090 GN=Gucy1b1 PE=1 SV=1
old/young	0.359	0.487512	0.312014	1227.07	0.808	2	1	inferred	Q3TML0	Q3TML0|Q3TML0_MOUSE Protein disulfide-isomerase A6 OS=Mus musculus OX=10090 GN=Pdia6 PE=1 SV=1
old/young	-0.144	0.488511	0.311125	1229.58	0.808	3	8	inferred	Q8BL86	Q8BL86|MBLC2_MOUSE Metallo-beta-lactamase domain-containing protein 2 OS=Mus musculus OX=10090 GN=Mblac2 PE=1 SV=2
old/young	-0.393	0.48951	0.310238	1232.1	0.808	1	1	inferred	Q62165	Q62165|DAG1_MOUSE Dystroglycan OS=Mus musculus OX=10090 GN=Dag1 PE=1 SV=4
old/young	0.258	0.498501	0.302334	1254.73	0.808	2	1	inferred	Q9CQU0	Q9CQU0|TXD12_MOUSE Thioredoxin domain-containing protein 12 OS=Mus musculus OX=10090 GN=Txndc12 PE=1 SV=1
old/young	0.132	0.498501	0.302334	1254.73	0.808	3	13	inferred	Q8BMS1	Q8BMS1|ECHA_MOUSE Trifunctional enzyme subunit alpha, mitochondrial OS=Mus musculus OX=10090 GN=Hadha PE=1 SV=1
old/young	-0.133	0.4995	0.301464	1257.24	0.808	3	8	inferred	Q03137	Q03137|EPHA4_MOUSE Ephrin type-A receptor 4 OS=Mus musculus OX=10090 GN=Epha4 PE=1 SV=2
old/young	-0.202	0.501499	0.29973	1262.27	0.808	3	1	unresolved	Q9QXK3;Q9QZE5	Q9QXK3|COPG2_MOUSE Coatomer subunit gamma-2 OS=Mus musculus OX=10090 GN=Copg2 PE=1 SV=1
old/young	-0.16	0.503497	0.298004	1267.3	0.808	3	3	inferred	Q8CHG7	Q8CHG7|RPGF2_MOUSE Rap guanine nucleotide exchange factor 2 OS=Mus musculus OX=10090 GN=Rapgef2 PE=1 SV=2
old/young	0.256	0.507493	0.29457	1277.36	0.808	3	1	inferred	P09541	P09541|MYL4_MOUSE Myosin light chain 4 OS=Mus musculus OX=10090 GN=Myl4 PE=1 SV=3
old/young	0.243	0.508492	0.293716	1279.87	0.808	3	1	inferred	O08530	O08530|S1PR1_MOUSE Sphingosine 1-phosphate receptor 1 OS=Mus musculus OX=10090 GN=S1pr1 PE=1 SV=3
old/young	0.226	0.509491	0.292864	1282.39	0.808	3	1	inferred	Q9D0M5	Q9D0M5|DYL2_MOUSE Dynein light chain 2, cytoplasmic OS=Mus musculus OX=10090 GN=Dynll2 PE=1 SV=1
old/young	0.215	0.509491	0.292864	1282.39	0.808	3	2	inferred	P62627	P62627|DLRB1_MOUSE Dynein light chain roadblock-type 1 OS=Mus musculus OX=10090 GN=Dynlrb1 PE=1 SV=3
old/young	0.228	0.511489	0.291164	1287.42	0.808	3	1	inferred	P26645	P26645|MARCS_MOUSE Myristoylated alanine-rich C-kinase substrate OS=Mus musculus OX=10090 GN=Marcks PE=1 SV=2
old/young	0.225	0.511489	0.291164	1287.42	0.808	3	1	unresolved	P55258;P61027;P61028;P62823;P63011;Q8BHC1;Q91V41	P55258|RAB8A_MOUSE Ras-related protein Rab-8A OS=Mus musculus OX=10090 GN=Rab8a PE=1 SV=2
old/young	-0.249	0.512488	0.290317	1289.93	0.808	3	1	inferred	Q9QYB8	Q9QYB8|ADDB_MOUSE Beta-adducin OS=Mus musculus OX=10090 GN=Add2 PE=1 SV=4
old/young	0.36	0.486513	0.312905	1224.55	0.809	2	1	inferred	F6ZGR6	F6ZGR6|F6ZGR6_MOUSE RIKEN cDNA D430041D05 gene (Fragment) OS=Mus musculus OX=10090 GN=D430041D05Rik PE=1 SV=1
old/young	-0.151	0.488511	0.311125	1229.58	0.809	3	9	inferred	Q91V55	Q91V55|Q91V55_MOUSE 40S ribosomal protein S5 OS=Mus musculus OX=10090 GN=Rps5 PE=1 SV=1
old/young	-0.14	0.488511	0.311125	1229.58	0.809	3	9	inferred	P35802	P35802|GPM6A_MOUSE Neuronal membrane glycoprotein M6-a OS=Mus musculus OX=10090 GN=Gpm6a PE=1 SV=1
old/young	-0.395	0.48951	0.310238	1232.1	0.809	2	1	inferred	Q8BMQ2	Q8BMQ2|TF3C4_MOUSE General transcription factor 3C polypeptide 4 OS=Mus musculus OX=10090 GN=Gtf3c4 PE=1 SV=2
old/young	0.308	0.490509	0.309353	1234.61	0.809	2	1	inferred	Q6WQJ1	Q6WQJ1|DGLA_MOUSE Sn1-specific diacylglycerol lipase alpha OS=Mus musculus OX=10090 GN=Dagla PE=1 SV=2
old/young	-0.143	0.492507	0.307587	1239.64	0.809	3	8	inferred	P16054	P16054|KPCE_MOUSE Protein kinase C epsilon type OS=Mus musculus OX=10090 GN=Prkce PE=1 SV=1
old/young	-0.131	0.493506	0.306707	1242.16	0.809	3	13	inferred	P62702	P62702|RS4X_MOUSE 40S ribosomal protein S4, X isoform OS=Mus musculus OX=10090 GN=Rps4x PE=1 SV=2
old/young	-0.257	0.494505	0.305829	1244.67	0.809	3	1	inferred	Q922D8	Q922D8|C1TC_MOUSE C-1-tetrahydrofolate synthase, cytoplasmic OS=Mus musculus OX=10090 GN=Mthfd1 PE=1 SV=4
old/young	0.221	0.494505	0.305829	1244.67	0.809	3	2	inferred	P42867	P42867|GPT_MOUSE UDP-N-acetylglucosamine--dolichyl-phosphate N-acetylglucosaminephosphotransferase OS=Mus musculus OX=10090 GN=Dpagt1 PE=1 SV=2
old/young	0.505	0.498501	0.302334	1254.73	0.809	1	1	inferred	Q62313	Q62313|TGON1_MOUSE Trans-Golgi network integral membrane protein 1 OS=Mus musculus OX=10090 GN=Tgoln1 PE=1 SV=1
old/young	0.258	0.4995	0.301464	1257.24	0.809	3	1	inferred	Q9CPV4	Q9CPV4|GLOD4_MOUSE Glyoxalase domain-containing protein 4 OS=Mus musculus OX=10090 GN=Glod4 PE=1 SV=1
old/young	0.187	0.509491	0.292864	1282.39	0.809	3	2	inferred	Q9Z127	Q9Z127|LAT1_MOUSE Large neutral amino acids transporter small subunit 1 OS=Mus musculus OX=10090 GN=Slc7a5 PE=1 SV=2
old/young	0.406	0.512488	0.290317	1289.93	0.809	2	1	inferred	Q6GQT6	Q6GQT6|SCAP_MOUSE Sterol regulatory element-binding protein cleavage-activating protein OS=Mus musculus OX=10090 GN=Scap PE=1 SV=1
old/young	0.243	0.513487	0.289471	1292.45	0.809	3	2	inferred	Q8K4P8	Q8K4P8|HECW1_MOUSE E3 ubiquitin-protein ligase HECW1 OS=Mus musculus OX=10090 GN=Hecw1 PE=1 SV=3
old/young	-0.18	0.513487	0.289471	1292.45	0.809	3	2	inferred	O35609	O35609|SCAM3_MOUSE Secretory carrier-associated membrane protein 3 OS=Mus musculus OX=10090 GN=Scamp3 PE=1 SV=3
old/young	0.241	0.48951	0.310238	1232.1	0.81	3	1	inferred	P11404	P11404|FABPH_MOUSE Fatty acid-binding protein, heart OS=Mus musculus OX=10090 GN=Fabp3 PE=1 SV=5
old/young	-0.21	0.490509	0.309353	1234.61	0.81	3	1	unresolved	Q3UH60;Q8BWT5	Q3UH60|DIP2B_MOUSE Disco-interacting protein 2 homolog B OS=Mus musculus OX=10090 GN=Dip2b PE=1 SV=1
old/young	0.206	0.491508	0.308469	1237.13	0.81	3	2	inferred	Q921Q3	Q921Q3|ALG1_MOUSE Chitobiosyldiphosphodolichol beta-mannosyltransferase OS=Mus musculus OX=10090 GN=Alg1 PE=1 SV=3
old/young	-0.16	0.491508	0.308469	1237.13	0.81	3	6	inferred	P55066	P55066|NCAN_MOUSE Neurocan core protein OS=Mus musculus OX=10090 GN=Ncan PE=1 SV=1
old/young	0.201	0.492507	0.307587	1239.64	0.81	3	2	inferred	O88703	O88703|HCN2_MOUSE Potassium/sodium hyperpolarization-activated cyclic nucleotide-gated channel 2 OS=Mus musculus OX=10090 GN=Hcn2 PE=1 SV=1
old/young	-0.192	0.492507	0.307587	1239.64	0.81	3	2	unresolved	Q9QXY6;Q9WVK4	Q9QXY6|EHD3_MOUSE EH domain-containing protein 3 OS=Mus musculus OX=10090 GN=Ehd3 PE=1 SV=2
old/young	0.23	0.493506	0.306707	1242.16	0.81	3	1	inferred	B2RXM4	B2RXM4|NTM1B_MOUSE Alpha N-terminal protein methyltransferase 1B OS=Mus musculus OX=10090 GN=Mettl11b PE=2 SV=1
old/young	0.193	0.493506	0.306707	1242.16	0.81	3	2	inferred	Q9WV80	Q9WV80|SNX1_MOUSE Sorting nexin-1 OS=Mus musculus OX=10090 GN=Snx1 PE=1 SV=1
old/young	0.164	0.494505	0.305829	1244.67	0.81	3	4	inferred	Q9R1V7	Q9R1V7|ADA23_MOUSE Disintegrin and metalloproteinase domain-containing protein 23 OS=Mus musculus OX=10090 GN=Adam23 PE=1 SV=1
old/young	-0.147	0.494505	0.305829	1244.67	0.81	3	8	inferred	Q3TXX4	Q3TXX4|VGLU1_MOUSE Vesicular glutamate transporter 1 OS=Mus musculus OX=10090 GN=Slc17a7 PE=1 SV=2
old/young	-0.43	0.495504	0.304952	1247.18	0.81	1	1	inferred	Q80TN7	Q80TN7|NAV3_MOUSE Neuron navigator 3 OS=Mus musculus OX=10090 GN=Nav3 PE=1 SV=2
old/young	0.668	0.498501	0.302334	1254.73	0.81	3	4	inferred	P58158	P58158|B3GA3_MOUSE Galactosylgalactosylxylosylprotein 3-beta-glucuronosyltransferase 3 OS=Mus musculus OX=10090 GN=B3gat3 PE=1 SV=1
old/young	0.182	0.498501	0.302334	1254.73	0.81	3	3	inferred	Q1RLL3	Q1RLL3|CPNE9_MOUSE Copine-9 OS=Mus musculus OX=10090 GN=Cpne9 PE=1 SV=1
old/young	0.216	0.514486	0.288627	1294.96	0.81	3	1	inferred	P62823	P62823|RAB3C_MOUSE Ras-related protein Rab-3C OS=Mus musculus OX=10090 GN=Rab3c PE=1 SV=1
old/young	0.153	0.515485	0.287784	1297.47	0.81	3	3	inferred	P24668	P24668|MPRD_MOUSE Cation-dependent mannose-6-phosphate receptor OS=Mus musculus OX=10090 GN=M6pr PE=1 SV=1
old/young	0.143	0.492507	0.307587	1239.64	0.811	3	5	inferred	P19253	P19253|RL13A_MOUSE 60S ribosomal protein L13a OS=Mus musculus OX=10090 GN=Rpl13a PE=1 SV=4
old/young	0.215	0.496503	0.304078	1249.7	0.811	3	1	inferred	Q9D9E0	Q9D9E0|S22AH_MOUSE Solute carrier family 22 member 17 OS=Mus musculus OX=10090 GN=Slc22a17 PE=2 SV=2
old/young	0.176	0.497502	0.303205	1252.21	0.811	3	2	inferred	P63141	P63141|KCNA2_MOUSE Potassium voltage-gated channel subfamily A member 2 OS=Mus musculus OX=10090 GN=Kcna2 PE=1 SV=1
old/young	0.376	0.498501	0.302334	1254.73	0.811	1	2	inferred	D3YXJ0	D3YXJ0|D3YXJ0_MOUSE Diacylglycerol kinase OS=Mus musculus OX=10090 GN=Dgkh PE=1 SV=1
old/young	-0.119	0.498501	0.302334	1254.73	0.811	3	25	inferred	P84091	P84091|AP2M1_MOUSE AP-2 complex subunit mu OS=Mus musculus OX=10090 GN=Ap2m1 PE=1 SV=1
old/young	-0.161	0.515485	0.287784	1297.47	0.811	3	3	unresolved	A0A1Y7VJP1;A2AGL3;E9Q401	A0A1Y7VJP1|A0A1Y7VJP1_MOUSE Ryanodine receptor 2 (Fragment) OS=Mus musculus OX=10090 GN=Ryr2 PE=1 SV=1
old/young	-1.158	0.516484	0.286944	1299.99	0.811	3	1	inferred	Q9CQC9	Q9CQC9|SAR1B_MOUSE GTP-binding protein SAR1b OS=Mus musculus OX=10090 GN=Sar1b PE=1 SV=1
old/young	-0.28	0.517483	0.286104	1302.5	0.811	3	1	inferred	Q91X78	Q91X78|ERLN1_MOUSE Erlin-1 OS=Mus musculus OX=10090 GN=Erlin1 PE=1 SV=1
old/young	0.24	0.521479	0.282764	1312.56	0.811	3	1	unresolved	G5E863;Q9Z2W9	G5E863|G5E863_MOUSE Glutamate receptor 4 OS=Mus musculus OX=10090 GN=Gria4 PE=1 SV=1
old/young	-0.111	0.521479	0.282764	1312.56	0.811	3	21	inferred	P14148	P14148|RL7_MOUSE 60S ribosomal protein L7 OS=Mus musculus OX=10090 GN=Rpl7 PE=1 SV=2
old/young	-0.248	0.497502	0.303205	1252.21	0.812	3	1	inferred	Q6P1B1	Q6P1B1|XPP1_MOUSE Xaa-Pro aminopeptidase 1 OS=Mus musculus OX=10090 GN=Xpnpep1 PE=1 SV=1
old/young	0.222	0.497502	0.303205	1252.21	0.812	3	2	inferred	Q9DB34	Q9DB34|CHM2A_MOUSE Charged multivesicular body protein 2a OS=Mus musculus OX=10090 GN=Chmp2a PE=1 SV=1
old/young	0.229	0.498501	0.302334	1254.73	0.812	3	2	inferred	Q3ULD5	Q3ULD5|MCCB_MOUSE Methylcrotonoyl-CoA carboxylase beta chain, mitochondrial OS=Mus musculus OX=10090 GN=Mccc2 PE=1 SV=1
old/young	0.206	0.498501	0.302334	1254.73	0.812	3	1	unresolved	P11798;P28652;Q6PHZ2-5	P11798|KCC2A_MOUSE Calcium/calmodulin-dependent protein kinase type II subunit alpha OS=Mus musculus OX=10090 GN=Camk2a PE=1 SV=2
old/young	-0.199	0.517483	0.286104	1302.5	0.812	3	1	unresolved	P60764;P60766;P60766-1;P63001;P84096	P60764|RAC3_MOUSE Ras-related C3 botulinum toxin substrate 3 OS=Mus musculus OX=10090 GN=Rac3 PE=1 SV=1
old/young	-0.129	0.517483	0.286104	1302.5	0.812	3	8	inferred	Q8VEK0	Q8VEK0|CC50A_MOUSE Cell cycle control protein 50A OS=Mus musculus OX=10090 GN=Tmem30a PE=1 SV=1
old/young	-0.21	0.518482	0.285267	1305.02	0.812	3	1	unresolved	O55022;Q80UU9	O55022|PGRC1_MOUSE Membrane-associated progesterone receptor component 1 OS=Mus musculus OX=10090 GN=Pgrmc1 PE=1 SV=4
old/young	-0.183	0.518482	0.285267	1305.02	0.812	3	3	inferred	Q64133	Q64133|AOFA_MOUSE Amine oxidase [flavin-containing] A OS=Mus musculus OX=10090 GN=Maoa PE=1 SV=3
old/young	0.265	0.519481	0.284431	1307.53	0.812	2	1	inferred	Q91VR8	Q91VR8|BRK1_MOUSE Protein BRICK1 OS=Mus musculus OX=10090 GN=Brk1 PE=1 SV=1
old/young	-0.167	0.519481	0.284431	1307.53	0.812	3	3	unresolved	A0A1L1SV25;Q7TPR4	A0A1L1SV25|A0A1L1SV25_MOUSE Alpha-actinin-4 OS=Mus musculus OX=10090 GN=Actn4 PE=1 SV=1
old/young	0.178	0.52048	0.283596	1310.05	0.812	3	1	unresolved	P47753;P47754	P47753|CAZA1_MOUSE F-actin-capping protein subunit alpha-1 OS=Mus musculus OX=10090 GN=Capza1 PE=1 SV=4
old/young	0.175	0.52048	0.283596	1310.05	0.812	3	3	inferred	Q91W90	Q91W90|TXND5_MOUSE Thioredoxin domain-containing protein 5 OS=Mus musculus OX=10090 GN=Txndc5 PE=1 SV=2
old/young	-0.254	0.521479	0.282764	1312.56	0.812	3	1	inferred	P83887	P83887|TBG1_MOUSE Tubulin gamma-1 chain OS=Mus musculus OX=10090 GN=Tubg1 PE=1 SV=1
old/young	-0.167	0.521479	0.282764	1312.56	0.812	3	3	inferred	Q3UTZ3	Q3UTZ3|CG043_MOUSE Uncharacterized protein C7orf43 homolog OS=Mus musculus OX=10090 PE=1 SV=1
old/young	0.267	0.525475	0.279448	1322.62	0.812	2	1	inferred	P39054	P39054|DYN2_MOUSE Dynamin-2 OS=Mus musculus OX=10090 GN=Dnm2 PE=1 SV=2
old/young	0.182	0.525475	0.279448	1322.62	0.812	3	2	inferred	O35316	O35316|SC6A6_MOUSE Sodium- and chloride-dependent taurine transporter OS=Mus musculus OX=10090 GN=Slc6a6 PE=1 SV=2
old/young	0.21	0.526474	0.278623	1325.13	0.812	3	1	inferred	Q8JZN7	Q8JZN7|MIRO2_MOUSE Mitochondrial Rho GTPase 2 OS=Mus musculus OX=10090 GN=Rhot2 PE=1 SV=1
old/young	0.177	0.526474	0.278623	1325.13	0.812	3	3	inferred	Q99M71	Q99M71|EPDR1_MOUSE Mammalian ependymin-related protein 1 OS=Mus musculus OX=10090 GN=Epdr1 PE=1 SV=1
old/young	0.242	0.517483	0.286104	1302.5	0.813	3	1	inferred	Q8BHC1	Q8BHC1|RB39B_MOUSE Ras-related protein Rab-39B OS=Mus musculus OX=10090 GN=Rab39b PE=1 SV=1
old/young	-0.268	0.519481	0.284431	1307.53	0.813	3	1	inferred	Q6P4T2	Q6P4T2|U520_MOUSE U5 small nuclear ribonucleoprotein 200 kDa helicase OS=Mus musculus OX=10090 GN=Snrnp200 PE=1 SV=1
old/young	-0.254	0.52048	0.283596	1310.05	0.813	3	1	inferred	Q69ZU6	Q69ZU6|THS7A_MOUSE Thrombospondin type-1 domain-containing protein 7A OS=Mus musculus OX=10090 GN=Thsd7a PE=1 SV=2
old/young	-0.155	0.521479	0.282764	1312.56	0.813	3	5	inferred	Q8VHE0	Q8VHE0|SEC63_MOUSE Translocation protein SEC63 homolog OS=Mus musculus OX=10090 GN=Sec63 PE=1 SV=4
old/young	-0.169	0.523477	0.281103	1317.59	0.813	3	2	inferred	Q9JJJ7	Q9JJJ7|PORCN_MOUSE Protein-serine O-palmitoleoyltransferase porcupine OS=Mus musculus OX=10090 GN=Porcn PE=1 SV=1
old/young	-0.161	0.523477	0.281103	1317.59	0.813	3	5	inferred	Q9D1Q6	Q9D1Q6|ERP44_MOUSE Endoplasmic reticulum resident protein 44 OS=Mus musculus OX=10090 GN=Erp44 PE=1 SV=1
old/young	0.208	0.524476	0.280275	1320.1	0.813	2	3	inferred	Q60963	Q60963|PAFA_MOUSE Platelet-activating factor acetylhydrolase OS=Mus musculus OX=10090 GN=Pla2g7 PE=2 SV=2
old/young	0.174	0.524476	0.280275	1320.1	0.813	3	3	inferred	A0A0F6AIX5	A0A0F6AIX5|A0A0F6AIX5_MOUSE Lipid droplet-associated hydrolase OS=Mus musculus OX=10090 GN=Ldah PE=1 SV=1
old/young	-0.369	0.525475	0.279448	1322.62	0.813	2	1	inferred	B1AY13	B1AY13|UBP24_MOUSE Ubiquitin carboxyl-terminal hydrolase 24 OS=Mus musculus OX=10090 GN=Usp24 PE=1 SV=1
old/young	-0.141	0.525475	0.279448	1322.62	0.813	3	3	unresolved	A2AQ07;P68372;P99024;Q7TMM9;Q922F4;Q9CWF2;Q9D6F9;Q9ERD7	A2AQ07|TBB1_MOUSE Tubulin beta-1 chain OS=Mus musculus OX=10090 GN=Tubb1 PE=1 SV=1
old/young	0.25	0.526474	0.278623	1325.13	0.813	3	1	inferred	P28661	P28661|SEPT4_MOUSE Septin-4 OS=Mus musculus OX=10090 GN=Sept4 PE=1 SV=1
old/young	-0.228	0.527473	0.2778	1327.65	0.813	3	1	inferred	P28741	P28741|KIF3A_MOUSE Kinesin-like protein KIF3A OS=Mus musculus OX=10090 GN=Kif3a PE=1 SV=2
old/young	0.19	0.528472	0.276978	1330.16	0.813	3	2	inferred	Q9JKW0	Q9JKW0|AR6P1_MOUSE ADP-ribosylation factor-like protein 6-interacting protein 1 OS=Mus musculus OX=10090 GN=Arl6ip1 PE=1 SV=1
old/young	0.265	0.529471	0.276158	1332.68	0.813	3	1	inferred	Q9Z2C9	Q9Z2C9|MTMR7_MOUSE Myotubularin-related protein 7 OS=Mus musculus OX=10090 GN=Mtmr7 PE=1 SV=2
old/young	0.209	0.524476	0.280275	1320.1	0.814	3	2	inferred	Q9D172	Q9D172|ES1_MOUSE ES1 protein homolog, mitochondrial OS=Mus musculus OX=10090 GN=D10Jhu81e PE=1 SV=1
old/young	0.188	0.525475	0.279448	1322.62	0.814	3	2	inferred	Q9D7X1	Q9D7X1|KCTD4_MOUSE BTB/POZ domain-containing protein KCTD4 OS=Mus musculus OX=10090 GN=Kctd4 PE=1 SV=1
old/young	0.233	0.528472	0.276978	1330.16	0.814	3	1	inferred	O35972	O35972|RM23_MOUSE 39S ribosomal protein L23, mitochondrial OS=Mus musculus OX=10090 GN=Mrpl23 PE=1 SV=1
old/young	0.221	0.528472	0.276978	1330.16	0.814	3	1	inferred	rev_Q8BIZ1	Q8BIZ1|ANS1B_MOUSE reversed Ankyrin repeat and sterile alpha motif domain-containing protein 1B OS=Mus musculus OX=10090 GN=Anks1b PE=1 SV=3
old/young	0.122	0.529471	0.276158	1332.68	0.814	3	13	inferred	P17183	P17183|ENOG_MOUSE Gamma-enolase OS=Mus musculus OX=10090 GN=Eno2 PE=1 SV=2
old/young	0.101	0.529471	0.276158	1332.68	0.814	3	20	inferred	P08113	P08113|ENPL_MOUSE Endoplasmin OS=Mus musculus OX=10090 GN=Hsp90b1 PE=1 SV=2
old/young	-0.17	0.531469	0.274522	1337.71	0.814	3	4	inferred	O88712	O88712|CTBP1_MOUSE C-terminal-binding protein 1 OS=Mus musculus OX=10090 GN=Ctbp1 PE=1 SV=2
old/young	-0.193	0.532468	0.273707	1340.22	0.814	3	1	unresolved	P08103;P39688;Q61851	P08103|HCK_MOUSE Tyrosine-protein kinase HCK OS=Mus musculus OX=10090 GN=Hck PE=1 SV=4
old/young	-0.141	0.532468	0.273707	1340.22	0.814	3	9	inferred	B2RXC1	B2RXC1|TPC11_MOUSE Trafficking protein particle complex subunit 11 OS=Mus musculus OX=10090 GN=Trappc11 PE=1 SV=1
old/young	0.176	0.531469	0.274522	1337.71	0.815	3	3	inferred	A0A0A6YY91	A0A0A6YY91|A0A0A6YY91_MOUSE Neural cell adhesion molecule 1 (Fragment) OS=Mus musculus OX=10090 GN=Ncam1 PE=1 SV=1
old/young	-0.104	0.531469	0.274522	1337.71	0.815	3	24	unresolved	P39053;P39053-3	P39053|DYN1_MOUSE Dynamin-1 OS=Mus musculus OX=10090 GN=Dnm1 PE=1 SV=2
old/young	-0.745	0.532468	0.273707	1340.22	0.815	3	2	inferred	Q810C1	Q810C1|SLIK1_MOUSE SLIT and NTRK-like protein 1 OS=Mus musculus OX=10090 GN=Slitrk1 PE=2 SV=1
old/young	-0.174	0.532468	0.273707	1340.22	0.815	3	2	unresolved	Q3UGX2;Q62261;Q68FG2	Q3UGX2|Q3UGX2_MOUSE Spectrin beta chain OS=Mus musculus OX=10090 GN=Sptb PE=1 SV=1
old/young	0.205	0.533467	0.272893	1342.74	0.815	3	1	inferred	rev_Q3UPC7	Q3UPC7|K0825_MOUSE reversed Uncharacterized protein KIAA0825 homolog OS=Mus musculus OX=10090 PE=2 SV=3
old/young	0.192	0.534466	0.27208	1345.25	0.815	3	2	inferred	Q61207	Q61207|SAP_MOUSE Prosaposin OS=Mus musculus OX=10090 GN=Psap PE=1 SV=2
old/young	-0.162	0.551449	0.258495	1388	0.815	3	2	unresolved	B2RXT3;Q60597	B2RXT3|B2RXT3_MOUSE Ogdhl protein OS=Mus musculus OX=10090 GN=Ogdhl PE=1 SV=1
old/young	0.148	0.551449	0.258495	1388	0.815	3	4	inferred	E9Q9B7	E9Q9B7|E9Q9B7_MOUSE Kinase D-interacting substrate 220 OS=Mus musculus OX=10090 GN=Kidins220 PE=1 SV=1
old/young	-0.209	0.552448	0.257709	1390.51	0.815	3	2	inferred	Q924C1	Q924C1|XPO5_MOUSE Exportin-5 OS=Mus musculus OX=10090 GN=Xpo5 PE=1 SV=1
old/young	-0.146	0.552448	0.257709	1390.51	0.815	3	4	inferred	Q4KUS2	Q4KUS2|UN13A_MOUSE Protein unc-13 homolog A OS=Mus musculus OX=10090 GN=Unc13a PE=1 SV=3
old/young	0.205	0.531469	0.274522	1337.71	0.816	2	2	unresolved	Q62419;Q62420	Q62419|SH3G1_MOUSE Endophilin-A2 OS=Mus musculus OX=10090 GN=Sh3gl1 PE=1 SV=1
old/young	0.173	0.534466	0.27208	1345.25	0.816	3	4	inferred	Q8C729	Q8C729|F126B_MOUSE Protein FAM126B OS=Mus musculus OX=10090 GN=Fam126b PE=1 SV=1
old/young	1.123	0.535465	0.271269	1347.76	0.816	2	1	inferred	rev_E9Q876	E9Q876|E9Q876_MOUSE reversed ATP-binding cassette, sub-family A (ABC1), member 12 OS=Mus musculus OX=10090 GN=Abca12 PE=4 SV=1
old/young	-0.246	0.548452	0.260862	1380.45	0.816	3	1	inferred	O35864	O35864|CSN5_MOUSE COP9 signalosome complex subunit 5 OS=Mus musculus OX=10090 GN=Cops5 PE=1 SV=3
old/young	0.135	0.548452	0.260862	1380.45	0.816	3	6	inferred	P98191	P98191|CDS1_MOUSE Phosphatidate cytidylyltransferase 1 OS=Mus musculus OX=10090 GN=Cds1 PE=1 SV=2
old/young	0.181	0.549451	0.260071	1382.97	0.816	3	2	inferred	Q3TRM4	Q3TRM4|PLPL6_MOUSE Neuropathy target esterase OS=Mus musculus OX=10090 GN=Pnpla6 PE=1 SV=2
old/young	0.18	0.551449	0.258495	1388	0.816	3	2	inferred	Q8VEK2	Q8VEK2|RHBD2_MOUSE Rhomboid domain-containing protein 2 OS=Mus musculus OX=10090 GN=Rhbdd2 PE=1 SV=1
old/young	-0.168	0.551449	0.258495	1388	0.816	3	2	inferred	O88545	O88545|CSN6_MOUSE COP9 signalosome complex subunit 6 OS=Mus musculus OX=10090 GN=Cops6 PE=1 SV=1
old/young	-0.154	0.551449	0.258495	1388	0.816	3	3	inferred	Q7TMC8	Q7TMC8|FUK_MOUSE L-fucose kinase OS=Mus musculus OX=10090 GN=Fuk PE=1 SV=1
old/young	0.118	0.552448	0.257709	1390.51	0.816	3	13	inferred	Q3UUQ7	Q3UUQ7|PGAP1_MOUSE GPI inositol-deacylase OS=Mus musculus OX=10090 GN=Pgap1 PE=1 SV=3
old/young	0.217	0.553447	0.256924	1393.02	0.816	2	1	inferred	Q3UV17	Q3UV17|K22O_MOUSE Keratin, type II cytoskeletal 2 oral OS=Mus musculus OX=10090 GN=Krt76 PE=1 SV=1
old/young	0.159	0.536464	0.27046	1350.28	0.817	3	2	inferred	P21460	P21460|CYTC_MOUSE Cystatin-C OS=Mus musculus OX=10090 GN=Cst3 PE=1 SV=2
old/young	0.129	0.536464	0.27046	1350.28	0.817	3	7	inferred	Q2TA57	Q2TA57|ASPH1_MOUSE Aspartate beta-hydroxylase domain-containing protein 1 OS=Mus musculus OX=10090 GN=Asphd1 PE=2 SV=2
old/young	0.132	0.537463	0.269652	1352.79	0.817	3	6	unresolved	Q62261;Q68FG2	Q62261|SPTB2_MOUSE Spectrin beta chain, non-erythrocytic 1 OS=Mus musculus OX=10090 GN=Sptbn1 PE=1 SV=2
old/young	-0.178	0.538462	0.268845	1355.31	0.817	3	3	inferred	O88342	O88342|WDR1_MOUSE WD repeat-containing protein 1 OS=Mus musculus OX=10090 GN=Wdr1 PE=1 SV=3
old/young	-0.204	0.548452	0.260862	1380.45	0.817	3	2	inferred	Q8BK63	Q8BK63|KC1A_MOUSE Casein kinase I isoform alpha OS=Mus musculus OX=10090 GN=Csnk1a1 PE=1 SV=2
old/young	-0.13	0.548452	0.260862	1380.45	0.817	3	6	inferred	P62889	P62889|RL30_MOUSE 60S ribosomal protein L30 OS=Mus musculus OX=10090 GN=Rpl30 PE=1 SV=2
old/young	-0.352	0.549451	0.260071	1382.97	0.817	3	64	unresolved	Q5SV64;Q61879	Q5SV64|Q5SV64_MOUSE Myosin-10 OS=Mus musculus OX=10090 GN=Myh10 PE=1 SV=1
old/young	-0.166	0.55045	0.259282	1385.48	0.817	3	4	inferred	Q8BJZ4	Q8BJZ4|RT35_MOUSE 28S ribosomal protein S35, mitochondrial OS=Mus musculus OX=10090 GN=Mrps35 PE=1 SV=2
old/young	-0.122	0.55045	0.259282	1385.48	0.817	3	7	inferred	Q64514-2	Q64514-2|TPP2_MOUSE Isoform Short of Tripeptidyl-peptidase 2 OS=Mus musculus OX=10090 GN=Tpp2
old/young	-0.218	0.551449	0.258495	1388	0.817	3	1	unresolved	Q9EPN1;Q9ESE1	Q9EPN1|NBEA_MOUSE Neurobeachin OS=Mus musculus OX=10090 GN=Nbea PE=1 SV=1
old/young	-0.11	0.551449	0.258495	1388	0.817	3	15	inferred	Q91VE0	Q91VE0|S27A4_MOUSE Long-chain fatty acid transport protein 4 OS=Mus musculus OX=10090 GN=Slc27a4 PE=1 SV=1
old/young	0.673	0.554446	0.256141	1395.54	0.817	3	3	unresolved	A8DUK4;P02088	A8DUK4|A8DUK4_MOUSE Beta-globin OS=Mus musculus OX=10090 GN=Hbb-bs PE=1 SV=1
old/young	0.175	0.555445	0.255359	1398.05	0.817	3	2	inferred	Q8BYU6	Q8BYU6|TOIP2_MOUSE Torsin-1A-interacting protein 2 OS=Mus musculus OX=10090 GN=Tor1aip2 PE=1 SV=1
old/young	0.133	0.56044	0.251471	1410.63	0.817	3	12	inferred	Q04690	Q04690|NF1_MOUSE Neurofibromin OS=Mus musculus OX=10090 GN=Nf1 PE=1 SV=1
old/young	0.173	0.537463	0.269652	1352.79	0.818	3	2	inferred	Q9JIA7	Q9JIA7|SPHK2_MOUSE Sphingosine kinase 2 OS=Mus musculus OX=10090 GN=Sphk2 PE=1 SV=2
old/young	-0.24	0.538462	0.268845	1355.31	0.818	3	1	inferred	Q3UGR5	Q3UGR5|HDHD2_MOUSE Haloacid dehalogenase-like hydrolase domain-containing protein 2 OS=Mus musculus OX=10090 GN=Hdhd2 PE=1 SV=2
old/young	-0.23	0.538462	0.268845	1355.31	0.818	3	1	unresolved	Q69ZK9;Q99K10	Q69ZK9|NLGN2_MOUSE Neuroligin-2 OS=Mus musculus OX=10090 GN=Nlgn2 PE=1 SV=2
old/young	0.246	0.539461	0.26804	1357.82	0.818	3	1	inferred	Q9WVK4	Q9WVK4|EHD1_MOUSE EH domain-containing protein 1 OS=Mus musculus OX=10090 GN=Ehd1 PE=1 SV=1
old/young	-0.208	0.539461	0.26804	1357.82	0.818	3	1	inferred	P28843	P28843|DPP4_MOUSE Dipeptidyl peptidase 4 OS=Mus musculus OX=10090 GN=Dpp4 PE=1 SV=3
old/young	0.298	0.54046	0.267237	1360.34	0.818	2	1	inferred	Q8R2Y2	Q8R2Y2|MUC18_MOUSE Cell surface glycoprotein MUC18 OS=Mus musculus OX=10090 GN=Mcam PE=1 SV=1
old/young	0.214	0.543457	0.264835	1367.88	0.818	3	1	inferred	Q80ZU0	Q80ZU0|ARL5A_MOUSE ADP-ribosylation factor-like protein 5A OS=Mus musculus OX=10090 GN=Arl5a PE=1 SV=1
old/young	0.213	0.543457	0.264835	1367.88	0.818	2	2	inferred	Q8K273	Q8K273|MMGT1_MOUSE Membrane magnesium transporter 1 OS=Mus musculus OX=10090 GN=Mmgt1 PE=1 SV=1
old/young	0.137	0.544456	0.264038	1370.39	0.818	3	9	inferred	Q60875	Q60875|ARHG2_MOUSE Rho guanine nucleotide exchange factor 2 OS=Mus musculus OX=10090 GN=Arhgef2 PE=1 SV=4
old/young	0.114	0.544456	0.264038	1370.39	0.818	3	16	inferred	E9Q3L2	E9Q3L2|PI4KA_MOUSE Phosphatidylinositol 4-kinase alpha OS=Mus musculus OX=10090 GN=Pi4ka PE=1 SV=2
old/young	-0.172	0.545455	0.263241	1372.91	0.818	3	2	inferred	Q9WUM4	Q9WUM4|COR1C_MOUSE Coronin-1C OS=Mus musculus OX=10090 GN=Coro1c PE=1 SV=2
old/young	-0.312	0.546454	0.262447	1375.42	0.818	2	2	inferred	Q9Z204	Q9Z204|HNRPC_MOUSE Heterogeneous nuclear ribonucleoproteins C1/C2 OS=Mus musculus OX=10090 GN=Hnrnpc PE=1 SV=1
old/young	0.232	0.546454	0.262447	1375.42	0.818	3	1	inferred	Q80U95	Q80U95|UBE3C_MOUSE Ubiquitin-protein ligase E3C OS=Mus musculus OX=10090 GN=Ube3c PE=1 SV=2
old/young	0.173	0.547453	0.261654	1377.94	0.818	3	2	inferred	Q3UHH2	Q3UHH2|S22AN_MOUSE Solute carrier family 22 member 23 OS=Mus musculus OX=10090 GN=Slc22a23 PE=2 SV=1
old/young	0.124	0.547453	0.261654	1377.94	0.818	3	9	inferred	Q9EPN1	Q9EPN1|NBEA_MOUSE Neurobeachin OS=Mus musculus OX=10090 GN=Nbea PE=1 SV=1
old/young	0.17	0.548452	0.260862	1380.45	0.818	3	2	unresolved	B0V2N1;Q64487	B0V2N1|PTPRS_MOUSE Receptor-type tyrosine-protein phosphatase S OS=Mus musculus OX=10090 GN=Ptprs PE=1 SV=1
old/young	0.137	0.548452	0.260862	1380.45	0.818	3	4	inferred	Q9JJI8	Q9JJI8|RL38_MOUSE 60S ribosomal protein L38 OS=Mus musculus OX=10090 GN=Rpl38 PE=1 SV=3
old/young	0.168	0.551449	0.258495	1388	0.818	3	1	inferred	Q9EQK7	Q9EQK7|ICMT_MOUSE Protein-S-isoprenylcysteine O-methyltransferase OS=Mus musculus OX=10090 GN=Icmt PE=2 SV=2
old/young	-0.116	0.555445	0.255359	1398.05	0.818	3	8	inferred	P62192	P62192|PRS4_MOUSE 26S proteasome regulatory subunit 4 OS=Mus musculus OX=10090 GN=Psmc1 PE=1 SV=1
old/young	0.121	0.556444	0.254579	1400.57	0.818	3	8	inferred	B0V2N1	B0V2N1|PTPRS_MOUSE Receptor-type tyrosine-protein phosphatase S OS=Mus musculus OX=10090 GN=Ptprs PE=1 SV=1
old/young	-0.2	0.557443	0.2538	1403.08	0.818	3	1	inferred	Q8R3Q2	Q8R3Q2|PP6R2_MOUSE Serine/threonine-protein phosphatase 6 regulatory subunit 2 OS=Mus musculus OX=10090 GN=Ppp6r2 PE=1 SV=1
old/young	0.472	0.559441	0.252246	1408.11	0.818	1	1	inferred	Q69ZN7	Q69ZN7|MYOF_MOUSE Myoferlin OS=Mus musculus OX=10090 GN=Myof PE=1 SV=2
old/young	0.142	0.559441	0.252246	1408.11	0.818	3	3	inferred	G5E863	G5E863|G5E863_MOUSE Glutamate receptor 4 OS=Mus musculus OX=10090 GN=Gria4 PE=1 SV=1
old/young	0.182	0.56044	0.251471	1410.63	0.818	3	2	inferred	O35382	O35382|EXOC4_MOUSE Exocyst complex component 4 OS=Mus musculus OX=10090 GN=Exoc4 PE=1 SV=2
old/young	0.135	0.56044	0.251471	1410.63	0.818	3	5	inferred	Q80T41	Q80T41|GABR2_MOUSE Gamma-aminobutyric acid type B receptor subunit 2 OS=Mus musculus OX=10090 GN=Gabbr2 PE=1 SV=2
old/young	-0.172	0.561439	0.250698	1413.14	0.818	3	2	inferred	Q9JJ59	Q9JJ59|ABCB9_MOUSE ATP-binding cassette sub-family B member 9 OS=Mus musculus OX=10090 GN=Abcb9 PE=2 SV=1
old/young	-0.181	0.54046	0.267237	1360.34	0.819	3	1	inferred	P68373	P68373|TBA1C_MOUSE Tubulin alpha-1C chain OS=Mus musculus OX=10090 GN=Tuba1c PE=1 SV=1
old/young	0.226	0.541459	0.266435	1362.85	0.819	3	1	inferred	P62071	P62071|RRAS2_MOUSE Ras-related protein R-Ras2 OS=Mus musculus OX=10090 GN=Rras2 PE=1 SV=1
old/young	0.179	0.541459	0.266435	1362.85	0.819	3	2	inferred	O35737	O35737|HNRH1_MOUSE Heterogeneous nuclear ribonucleoprotein H OS=Mus musculus OX=10090 GN=Hnrnph1 PE=1 SV=3
old/young	-0.281	0.542458	0.265634	1365.37	0.819	2	1	inferred	Q6PD28	Q6PD28|2A5B_MOUSE Serine/threonine-protein phosphatase 2A 56 kDa regulatory subunit beta isoform OS=Mus musculus OX=10090 GN=Ppp2r5b PE=1 SV=1
old/young	-0.132	0.542458	0.265634	1365.37	0.819	3	6	inferred	Q6ZWV3	Q6ZWV3|RL10_MOUSE 60S ribosomal protein L10 OS=Mus musculus OX=10090 GN=Rpl10 PE=1 SV=3
old/young	-0.317	0.543457	0.264835	1367.88	0.819	2	1	inferred	Q9DB70	Q9DB70|FUND1_MOUSE FUN14 domain-containing protein 1 OS=Mus musculus OX=10090 GN=Fundc1 PE=1 SV=1
old/young	0.221	0.543457	0.264835	1367.88	0.819	3	2	inferred	Q91V61	Q91V61|SFXN3_MOUSE Sideroflexin-3 OS=Mus musculus OX=10090 GN=Sfxn3 PE=1 SV=1
old/young	-0.246	0.544456	0.264038	1370.39	0.819	3	1	inferred	A0A286YDI8	A0A286YDI8|A0A286YDI8_MOUSE Sec24-related gene family, member C (S. cerevisiae) OS=Mus musculus OX=10090 GN=Sec24c PE=1 SV=1
old/young	0.17	0.545455	0.263241	1372.91	0.819	3	4	inferred	Q99MR3	Q99MR3|S12A9_MOUSE Solute carrier family 12 member 9 OS=Mus musculus OX=10090 GN=Slc12a9 PE=1 SV=2
old/young	-0.237	0.546454	0.262447	1375.42	0.819	3	1	inferred	Q80UM3	Q80UM3|NAA15_MOUSE N-alpha-acetyltransferase 15, NatA auxiliary subunit OS=Mus musculus OX=10090 GN=Naa15 PE=1 SV=1
old/young	0.206	0.546454	0.262447	1375.42	0.819	3	1	inferred	rev_P30415	P30415|NKTR_MOUSE reversed NK-tumor recognition protein OS=Mus musculus OX=10090 GN=Nktr PE=1 SV=4
old/young	-0.132	0.547453	0.261654	1377.94	0.819	3	9	unresolved	Q6PIC6;Q6PIE5;Q8VDN2	Q6PIC6|AT1A3_MOUSE Sodium/potassium-transporting ATPase subunit alpha-3 OS=Mus musculus OX=10090 GN=Atp1a3 PE=1 SV=1
old/young	-0.299	0.548452	0.260862	1380.45	0.819	2	1	inferred	Q9DAU1	Q9DAU1|CNPY3_MOUSE Protein canopy homolog 3 OS=Mus musculus OX=10090 GN=Cnpy3 PE=1 SV=1
old/young	-0.23	0.557443	0.2538	1403.08	0.819	3	1	inferred	Q8R4G0	Q8R4G0|NTNG1_MOUSE Netrin-G1 OS=Mus musculus OX=10090 GN=Ntng1 PE=1 SV=2
old/young	0.122	0.557443	0.2538	1403.08	0.819	3	7	inferred	Q9Z2W0	Q9Z2W0|DNPEP_MOUSE Aspartyl aminopeptidase OS=Mus musculus OX=10090 GN=Dnpep PE=1 SV=2
old/young	-0.139	0.558442	0.253022	1405.6	0.819	3	6	inferred	P61982	P61982|1433G_MOUSE 14-3-3 protein gamma OS=Mus musculus OX=10090 GN=Ywhag PE=1 SV=2
old/young	0.222	0.559441	0.252246	1408.11	0.819	2	2	inferred	A6H5Z3	A6H5Z3|EXC6B_MOUSE Exocyst complex component 6B OS=Mus musculus OX=10090 GN=Exoc6b PE=1 SV=1
old/young	0.108	0.559441	0.252246	1408.11	0.819	3	11	inferred	P63011	P63011|RAB3A_MOUSE Ras-related protein Rab-3A OS=Mus musculus OX=10090 GN=Rab3a PE=1 SV=1
old/young	-0.197	0.56044	0.251471	1410.63	0.819	3	1	inferred	D3Z757	D3Z757|D3Z757_MOUSE WD repeat domain 86 OS=Mus musculus OX=10090 GN=Wdr86 PE=4 SV=1
old/young	0.153	0.563437	0.249155	1418.17	0.819	3	2	inferred	Q8VHW2	Q8VHW2|CCG8_MOUSE Voltage-dependent calcium channel gamma-8 subunit OS=Mus musculus OX=10090 GN=Cacng8 PE=1 SV=1
old/young	0.199	0.575425	0.240012	1448.34	0.819	3	1	inferred	rev_Q9DBU6	Q9DBU6|RSRC1_MOUSE reversed Serine/Arginine-related protein 53 OS=Mus musculus OX=10090 GN=Rsrc1 PE=1 SV=1
old/young	0.16	0.575425	0.240012	1448.34	0.819	3	3	inferred	Q91W53	Q91W53|GOGA7_MOUSE Golgin subfamily A member 7 OS=Mus musculus OX=10090 GN=Golga7 PE=1 SV=1
old/young	0.14	0.577423	0.238506	1453.37	0.819	3	3	inferred	P48758	P48758|CBR1_MOUSE Carbonyl reductase [NADPH] 1 OS=Mus musculus OX=10090 GN=Cbr1 PE=1 SV=3
old/young	-0.127	0.541459	0.266435	1362.85	0.82	3	7	inferred	Q5FWK3	Q5FWK3|RHG01_MOUSE Rho GTPase-activating protein 1 OS=Mus musculus OX=10090 GN=Arhgap1 PE=1 SV=1
old/young	0.207	0.542458	0.265634	1365.37	0.82	3	2	inferred	Q80TI0	Q80TI0|GRM1B_MOUSE GRAM domain-containing protein 1B OS=Mus musculus OX=10090 GN=Gramd1b PE=1 SV=2
old/young	-0.117	0.543457	0.264835	1367.88	0.82	3	13	inferred	P63101	P63101|1433Z_MOUSE 14-3-3 protein zeta/delta OS=Mus musculus OX=10090 GN=Ywhaz PE=1 SV=1
old/young	0.188	0.559441	0.252246	1408.11	0.82	3	1	unresolved	P56371;Q91ZR1	P56371|RAB4A_MOUSE Ras-related protein Rab-4A OS=Mus musculus OX=10090 GN=Rab4a PE=1 SV=2
old/young	0.142	0.559441	0.252246	1408.11	0.82	3	4	inferred	Q9CQW2	Q9CQW2|ARL8B_MOUSE ADP-ribosylation factor-like protein 8B OS=Mus musculus OX=10090 GN=Arl8b PE=1 SV=1
old/young	0.454	0.563437	0.249155	1418.17	0.82	3	3	inferred	Q8BWF0	Q8BWF0|SSDH_MOUSE Succinate-semialdehyde dehydrogenase, mitochondrial OS=Mus musculus OX=10090 GN=Aldh5a1 PE=1 SV=1
old/young	0.107	0.563437	0.249155	1418.17	0.82	3	10	inferred	P28652	P28652|KCC2B_MOUSE Calcium/calmodulin-dependent protein kinase type II subunit beta OS=Mus musculus OX=10090 GN=Camk2b PE=1 SV=2
old/young	-0.346	0.564436	0.248386	1420.68	0.82	2	1	inferred	Q7TT50	Q7TT50|MRCKB_MOUSE Serine/threonine-protein kinase MRCK beta OS=Mus musculus OX=10090 GN=Cdc42bpb PE=1 SV=2
old/young	-0.134	0.564436	0.248386	1420.68	0.82	3	5	inferred	P80316	P80316|TCPE_MOUSE T-complex protein 1 subunit epsilon OS=Mus musculus OX=10090 GN=Cct5 PE=1 SV=1
old/young	0.336	0.565435	0.247618	1423.2	0.82	3	14	inferred	Q8C129	Q8C129|LCAP_MOUSE Leucyl-cystinyl aminopeptidase OS=Mus musculus OX=10090 GN=Lnpep PE=1 SV=1
old/young	0.603	0.566434	0.246851	1425.71	0.82	3	4	inferred	Q9R118	Q9R118|HTRA1_MOUSE Serine protease HTRA1 OS=Mus musculus OX=10090 GN=Htra1 PE=1 SV=2
old/young	-0.128	0.566434	0.246851	1425.71	0.82	3	8	inferred	Q8CHC4	Q8CHC4|SYNJ1_MOUSE Synaptojanin-1 OS=Mus musculus OX=10090 GN=Synj1 PE=1 SV=3
old/young	1.009	0.574426	0.240766	1445.83	0.82	3	4	inferred	Q61838	Q61838|PZP_MOUSE Pregnancy zone protein OS=Mus musculus OX=10090 GN=Pzp PE=1 SV=3
old/young	0.231	0.575425	0.240012	1448.34	0.82	2	2	inferred	O35598	O35598|ADA10_MOUSE Disintegrin and metalloproteinase domain-containing protein 10 OS=Mus musculus OX=10090 GN=Adam10 PE=1 SV=2
old/young	0.102	0.575425	0.240012	1448.34	0.82	3	22	inferred	P68404-2	P68404-2|KPCB_MOUSE Isoform Beta-II of Protein kinase C beta type OS=Mus musculus OX=10090 GN=Prkcb
old/young	-0.193	0.576424	0.239258	1450.86	0.82	3	1	inferred	Q9D1N9	Q9D1N9|RM21_MOUSE 39S ribosomal protein L21, mitochondrial OS=Mus musculus OX=10090 GN=Mrpl21 PE=1 SV=1
old/young	0.264	0.577423	0.238506	1453.37	0.82	2	1	inferred	Q00558	Q00558|F8I2_MOUSE Factor VIII intron 22 protein OS=Mus musculus OX=10090 GN=F8a1 PE=1 SV=1
old/young	0.183	0.577423	0.238506	1453.37	0.82	3	2	inferred	P33173	P33173|KIF1A_MOUSE Kinesin-like protein KIF1A OS=Mus musculus OX=10090 GN=Kif1a PE=1 SV=2
old/young	0.168	0.578422	0.237756	1455.89	0.82	3	1	inferred	O08756	O08756|HCD2_MOUSE 3-hydroxyacyl-CoA dehydrogenase type-2 OS=Mus musculus OX=10090 GN=Hsd17b10 PE=1 SV=4
old/young	0.139	0.578422	0.237756	1455.89	0.82	3	7	inferred	E9QNF7	E9QNF7|E9QNF7_MOUSE Contactin-associated protein-like 2 OS=Mus musculus OX=10090 GN=Cntnap2 PE=1 SV=1
old/young	-0.125	0.563437	0.249155	1418.17	0.821	3	7	inferred	Q91VR5	Q91VR5|DDX1_MOUSE ATP-dependent RNA helicase DDX1 OS=Mus musculus OX=10090 GN=Ddx1 PE=1 SV=1
old/young	0.156	0.565435	0.247618	1423.2	0.821	3	3	inferred	Q3UU96	Q3UU96|MRCKA_MOUSE Serine/threonine-protein kinase MRCK alpha OS=Mus musculus OX=10090 GN=Cdc42bpa PE=1 SV=2
old/young	-0.136	0.566434	0.246851	1425.71	0.821	3	3	unresolved	P28738;Q61768	P28738|KIF5C_MOUSE Kinesin heavy chain isoform 5C OS=Mus musculus OX=10090 GN=Kif5c PE=1 SV=3
old/young	0.118	0.566434	0.246851	1425.71	0.821	3	7	inferred	P62983	P62983|RS27A_MOUSE Ubiquitin-40S ribosomal protein S27a OS=Mus musculus OX=10090 GN=Rps27a PE=1 SV=2
old/young	-0.136	0.567433	0.246086	1428.23	0.821	3	4	inferred	O54781	O54781|SRPK2_MOUSE SRSF protein kinase 2 OS=Mus musculus OX=10090 GN=Srpk2 PE=1 SV=2
old/young	0.151	0.572428	0.242279	1440.8	0.821	3	4	inferred	Q8BHY8	Q8BHY8|SNX14_MOUSE Sorting nexin-14 OS=Mus musculus OX=10090 GN=Snx14 PE=1 SV=2
old/young	-0.203	0.573427	0.241522	1443.31	0.821	3	1	inferred	P97503	P97503|NKX32_MOUSE Homeobox protein Nkx-3.2 OS=Mus musculus OX=10090 GN=Nkx3-2 PE=1 SV=2
old/young	0.125	0.573427	0.241522	1443.31	0.821	3	6	inferred	Q6PA06	Q6PA06|ATLA2_MOUSE Atlastin-2 OS=Mus musculus OX=10090 GN=Atl2 PE=1 SV=1
old/young	-0.236	0.574426	0.240766	1445.83	0.821	3	1	inferred	A2ANE1	A2ANE1|A2ANE1_MOUSE Reproductive homeobox 3F OS=Mus musculus OX=10090 GN=Rhox3f PE=4 SV=1
old/young	-0.143	0.574426	0.240766	1445.83	0.821	3	3	inferred	Q7TT37	Q7TT37|ELP1_MOUSE Elongator complex protein 1 OS=Mus musculus OX=10090 GN=Elp1 PE=1 SV=2
old/young	-0.1	0.574426	0.240766	1445.83	0.821	3	16	inferred	Q9QYR6	Q9QYR6|MAP1A_MOUSE Microtubule-associated protein 1A OS=Mus musculus OX=10090 GN=Map1a PE=1 SV=2
old/young	-0.129	0.575425	0.240012	1448.34	0.821	3	9	inferred	O35295	O35295|PURB_MOUSE Transcriptional activator protein Pur-beta OS=Mus musculus OX=10090 GN=Purb PE=1 SV=3
old/young	0.11	0.575425	0.240012	1448.34	0.821	3	10	inferred	Q9EQ06	Q9EQ06|DHB11_MOUSE Estradiol 17-beta-dehydrogenase 11 OS=Mus musculus OX=10090 GN=Hsd17b11 PE=1 SV=1
old/young	-0.129	0.577423	0.238506	1453.37	0.821	3	4	inferred	Q6ZWZ4	Q6ZWZ4|Q6ZWZ4_MOUSE 60S ribosomal protein L36 OS=Mus musculus OX=10090 GN=Rpl36 PE=1 SV=1
old/young	0.228	0.579421	0.237006	1458.4	0.821	3	1	inferred	A2AU34	A2AU34|A2AU34_MOUSE Transmembrane protein 74B OS=Mus musculus OX=10090 GN=Tmem74b PE=1 SV=1
old/young	0.161	0.58042	0.236258	1460.92	0.821	3	2	inferred	Q5SSH8	Q5SSH8|NEUFC_MOUSE Neuferricin OS=Mus musculus OX=10090 GN=Cyb5d2 PE=1 SV=1
old/young	-0.129	0.58042	0.236258	1460.92	0.821	3	3	inferred	O54983	O54983|CRYM_MOUSE Ketimine reductase mu-crystallin OS=Mus musculus OX=10090 GN=Crym PE=1 SV=1
old/young	0.112	0.581419	0.235511	1463.43	0.821	3	5	inferred	P14231	P14231|AT1B2_MOUSE Sodium/potassium-transporting ATPase subunit beta-2 OS=Mus musculus OX=10090 GN=Atp1b2 PE=1 SV=2
old/young	-0.181	0.595405	0.225188	1498.63	0.821	3	1	inferred	Q9CX86	Q9CX86|ROA0_MOUSE Heterogeneous nuclear ribonucleoprotein A0 OS=Mus musculus OX=10090 GN=Hnrnpa0 PE=1 SV=1
old/young	0.148	0.568432	0.245322	1430.74	0.822	3	2	unresolved	P63318;Q4VA93	P63318|KPCG_MOUSE Protein kinase C gamma type OS=Mus musculus OX=10090 GN=Prkcg PE=1 SV=1
old/young	0.213	0.569431	0.244559	1433.26	0.822	3	1	inferred	Q810U4-2	Q810U4-2|NRCAM_MOUSE Isoform 2 of Neuronal cell adhesion molecule OS=Mus musculus OX=10090 GN=Nrcam
old/young	0.153	0.569431	0.244559	1433.26	0.822	3	3	inferred	Q9CR89	Q9CR89|ERGI2_MOUSE Endoplasmic reticulum-Golgi intermediate compartment protein 2 OS=Mus musculus OX=10090 GN=Ergic2 PE=1 SV=1
old/young	-0.141	0.571429	0.243038	1438.29	0.822	3	3	inferred	Q8CGC7	Q8CGC7|SYEP_MOUSE Bifunctional glutamate/proline--tRNA ligase OS=Mus musculus OX=10090 GN=Eprs PE=1 SV=4
old/young	0.114	0.571429	0.243038	1438.29	0.822	3	5	inferred	Q0KL02	Q0KL02|TRIO_MOUSE Triple functional domain protein OS=Mus musculus OX=10090 GN=Trio PE=1 SV=3
old/young	0.546	0.572428	0.242279	1440.8	0.822	3	8	inferred	Q91VB8	Q91VB8|Q91VB8_MOUSE Alpha globin 1 OS=Mus musculus OX=10090 GN=Hba-a1 PE=1 SV=1
old/young	-0.409	0.572428	0.242279	1440.8	0.822	1	1	inferred	Q99N57	Q99N57|RAF1_MOUSE RAF proto-oncogene serine/threonine-protein kinase OS=Mus musculus OX=10090 GN=Raf1 PE=1 SV=2
old/young	0.137	0.573427	0.241522	1443.31	0.822	3	7	inferred	E9Q912	E9Q912|E9Q912_MOUSE RAP1, GTP-GDP dissociation stimulator 1 OS=Mus musculus OX=10090 GN=Rap1gds1 PE=1 SV=1
old/young	-0.135	0.573427	0.241522	1443.31	0.822	3	5	inferred	Q9Z1S5	Q9Z1S5|SEPT3_MOUSE Neuronal-specific septin-3 OS=Mus musculus OX=10090 GN=Sept3 PE=1 SV=2
old/young	-0.16	0.574426	0.240766	1445.83	0.822	3	2	inferred	P28650	P28650|PURA1_MOUSE Adenylosuccinate synthetase isozyme 1 OS=Mus musculus OX=10090 GN=Adssl1 PE=1 SV=2
old/young	0.191	0.58042	0.236258	1460.92	0.822	3	1	inferred	Q8BL97	Q8BL97|SRSF7_MOUSE Serine/arginine-rich splicing factor 7 OS=Mus musculus OX=10090 GN=Srsf7 PE=1 SV=1
old/young	-0.133	0.581419	0.235511	1463.43	0.822	3	6	inferred	Q9EPU0	Q9EPU0|RENT1_MOUSE Regulator of nonsense transcripts 1 OS=Mus musculus OX=10090 GN=Upf1 PE=1 SV=2
old/young	-0.208	0.582418	0.234766	1465.95	0.822	3	1	inferred	Q8R1J9	Q8R1J9|TOR2A_MOUSE Torsin-2A OS=Mus musculus OX=10090 GN=Tor2a PE=1 SV=1
old/young	0.086	0.582418	0.234766	1465.95	0.822	3	39	inferred	P11881	P11881|ITPR1_MOUSE Inositol 1,4,5-trisphosphate receptor type 1 OS=Mus musculus OX=10090 GN=Itpr1 PE=1 SV=2
old/young	0.231	0.583417	0.234021	1468.46	0.822	2	1	inferred	Q8C3B8	Q8C3B8|RFT1_MOUSE Protein RFT1 homolog OS=Mus musculus OX=10090 GN=Rft1 PE=2 SV=2
old/young	-0.223	0.59041	0.228847	1486.06	0.822	3	1	inferred	rev_P14106	P14106|C1QB_MOUSE reversed Complement C1q subcomponent subunit B OS=Mus musculus OX=10090 GN=C1qb PE=1 SV=2
old/young	0.382	0.591409	0.228112	1488.58	0.822	1	1	inferred	Q3UHD9	Q3UHD9|AGAP2_MOUSE Arf-GAP with GTPase, ANK repeat and PH domain-containing protein 2 OS=Mus musculus OX=10090 GN=Agap2 PE=1 SV=1
old/young	-0.13	0.591409	0.228112	1488.58	0.822	3	2	unresolved	P68372;P99024;Q7TMM9;Q922F4;Q9CWF2;Q9ERD7	P68372|TBB4B_MOUSE Tubulin beta-4B chain OS=Mus musculus OX=10090 GN=Tubb4b PE=1 SV=1
old/young	0.096	0.591409	0.228112	1488.58	0.822	3	8	inferred	P31650	P31650|S6A11_MOUSE Sodium- and chloride-dependent GABA transporter 3 OS=Mus musculus OX=10090 GN=Slc6a11 PE=1 SV=2
old/young	0.124	0.592408	0.227379	1491.09	0.822	3	3	inferred	Q3UN02	Q3UN02|LCLT1_MOUSE Lysocardiolipin acyltransferase 1 OS=Mus musculus OX=10090 GN=Lclat1 PE=1 SV=2
old/young	0.142	0.593407	0.226648	1493.6	0.822	3	2	unresolved	P61205;Q8BSL7	P61205|ARF3_MOUSE ADP-ribosylation factor 3 OS=Mus musculus OX=10090 GN=Arf3 PE=2 SV=2
old/young	-0.112	0.593407	0.226648	1493.6	0.822	3	7	inferred	P11499	P11499|HS90B_MOUSE Heat shock protein HSP 90-beta OS=Mus musculus OX=10090 GN=Hsp90ab1 PE=1 SV=3
old/young	-0.206	0.594406	0.225917	1496.12	0.822	2	1	inferred	Q61851	Q61851|FGFR3_MOUSE Fibroblast growth factor receptor 3 OS=Mus musculus OX=10090 GN=Fgfr3 PE=1 SV=1
old/young	-0.166	0.594406	0.225917	1496.12	0.822	3	2	inferred	Q9QXK3	Q9QXK3|COPG2_MOUSE Coatomer subunit gamma-2 OS=Mus musculus OX=10090 GN=Copg2 PE=1 SV=1
old/young	0.178	0.595405	0.225188	1498.63	0.822	3	1	inferred	rev_Q922B9	Q922B9|SSFA2_MOUSE reversed Sperm-specific antigen 2 homolog OS=Mus musculus OX=10090 GN=Ssfa2 PE=1 SV=3
old/young	-0.135	0.595405	0.225188	1498.63	0.822	3	2	inferred	D3YZI9	D3YZI9|PGBD5_MOUSE PiggyBac transposable element-derived protein 5 OS=Mus musculus OX=10090 GN=Pgbd5 PE=1 SV=1
old/young	-0.242	0.596404	0.22446	1501.15	0.822	2	1	inferred	P42125	P42125|ECI1_MOUSE Enoyl-CoA delta isomerase 1, mitochondrial OS=Mus musculus OX=10090 GN=Eci1 PE=1 SV=2
old/young	0.176	0.596404	0.22446	1501.15	0.822	3	2	inferred	Q9CPW4	Q9CPW4|ARPC5_MOUSE Actin-related protein 2/3 complex subunit 5 OS=Mus musculus OX=10090 GN=Arpc5 PE=1 SV=3
old/young	0.102	0.569431	0.244559	1433.26	0.823	3	10	inferred	Q9Z2U0	Q9Z2U0|PSA7_MOUSE Proteasome subunit alpha type-7 OS=Mus musculus OX=10090 GN=Psma7 PE=1 SV=1
old/young	0.087	0.57043	0.243798	1435.77	0.823	3	22	inferred	P46096	P46096|SYT1_MOUSE Synaptotagmin-1 OS=Mus musculus OX=10090 GN=Syt1 PE=1 SV=1
old/young	0.156	0.571429	0.243038	1438.29	0.823	3	2	inferred	Q99PT1	Q99PT1|GDIR1_MOUSE Rho GDP-dissociation inhibitor 1 OS=Mus musculus OX=10090 GN=Arhgdia PE=1 SV=3
old/young	0.146	0.571429	0.243038	1438.29	0.823	3	5	inferred	P57716	P57716|NICA_MOUSE Nicastrin OS=Mus musculus OX=10090 GN=Ncstn PE=1 SV=3
old/young	-0.206	0.572428	0.242279	1440.8	0.823	3	1	inferred	F8VPZ3	F8VPZ3|F8VPZ3_MOUSE Ubiquitin-specific peptidase 32 OS=Mus musculus OX=10090 GN=Usp32 PE=1 SV=1
old/young	0.173	0.583417	0.234021	1468.46	0.823	3	2	inferred	Q8K4Z5	Q8K4Z5|SF3A1_MOUSE Splicing factor 3A subunit 1 OS=Mus musculus OX=10090 GN=Sf3a1 PE=1 SV=1
old/young	0.143	0.584416	0.233278	1470.97	0.823	3	4	inferred	Q9DCH4	Q9DCH4|EIF3F_MOUSE Eukaryotic translation initiation factor 3 subunit F OS=Mus musculus OX=10090 GN=Eif3f PE=1 SV=2
old/young	0.141	0.584416	0.233278	1470.97	0.823	3	5	inferred	Q8K212	Q8K212|PACS1_MOUSE Phosphofurin acidic cluster sorting protein 1 OS=Mus musculus OX=10090 GN=Pacs1 PE=1 SV=2
old/young	-0.112	0.585415	0.232536	1473.49	0.823	3	6	inferred	Q9R1P0	Q9R1P0|PSA4_MOUSE Proteasome subunit alpha type-4 OS=Mus musculus OX=10090 GN=Psma4 PE=1 SV=1
old/young	0.28	0.586414	0.231796	1476	0.823	2	1	inferred	Q8BHF7	Q8BHF7|PGPS1_MOUSE CDP-diacylglycerol--glycerol-3-phosphate 3-phosphatidyltransferase, mitochondrial OS=Mus musculus OX=10090 GN=Pgs1 PE=1 SV=1
old/young	-0.973	0.587413	0.231057	1478.52	0.823	3	1	inferred	P18872-2	P18872-2|GNAO_MOUSE Isoform Alpha-2 of Guanine nucleotide-binding protein G(o) subunit alpha OS=Mus musculus OX=10090 GN=Gnao1
old/young	0.188	0.587413	0.231057	1478.52	0.823	3	1	inferred	P26883	P26883|FKB1A_MOUSE Peptidyl-prolyl cis-trans isomerase FKBP1A OS=Mus musculus OX=10090 GN=Fkbp1a PE=1 SV=2
old/young	0.241	0.588412	0.230319	1481.03	0.823	3	1	inferred	Q9Z2Q5	Q9Z2Q5|RM40_MOUSE 39S ribosomal protein L40, mitochondrial OS=Mus musculus OX=10090 GN=Mrpl40 PE=1 SV=2
old/young	-0.222	0.588412	0.230319	1481.03	0.823	3	1	inferred	Q8BYY4	Q8BYY4|TT39B_MOUSE Tetratricopeptide repeat protein 39B OS=Mus musculus OX=10090 GN=Ttc39b PE=1 SV=1
old/young	0.799	0.589411	0.229582	1483.55	0.823	3	1	inferred	E9Q7P1	E9Q7P1|E9Q7P1_MOUSE Collagen, type XXII, alpha 1 OS=Mus musculus OX=10090 GN=Col22a1 PE=1 SV=1
old/young	0.207	0.589411	0.229582	1483.55	0.823	3	1	inferred	Q91W69	Q91W69|EPN3_MOUSE Epsin-3 OS=Mus musculus OX=10090 GN=Epn3 PE=1 SV=1
old/young	0.182	0.59041	0.228847	1486.06	0.823	3	1	inferred	Q9QZ06	Q9QZ06|TOLIP_MOUSE Toll-interacting protein OS=Mus musculus OX=10090 GN=Tollip PE=1 SV=1
old/young	-0.157	0.59041	0.228847	1486.06	0.823	3	1	unresolved	P70704;P70704-2;P98200	P70704|AT8A1_MOUSE Phospholipid-transporting ATPase IA OS=Mus musculus OX=10090 GN=Atp8a1 PE=1 SV=2
old/young	0.162	0.591409	0.228112	1488.58	0.823	3	1	unresolved	Q61831;Q9WTU6	Q61831|MK10_MOUSE Mitogen-activated protein kinase 10 OS=Mus musculus OX=10090 GN=Mapk10 PE=1 SV=2
old/young	-0.115	0.591409	0.228112	1488.58	0.823	3	6	inferred	Q9QYG0-2	Q9QYG0-2|NDRG2_MOUSE Isoform 2 of Protein NDRG2 OS=Mus musculus OX=10090 GN=Ndrg2
old/young	-0.138	0.593407	0.226648	1493.6	0.823	3	5	inferred	Q9EQF6	Q9EQF6|DPYL5_MOUSE Dihydropyrimidinase-related protein 5 OS=Mus musculus OX=10090 GN=Dpysl5 PE=1 SV=1
old/young	-0.097	0.593407	0.226648	1493.6	0.823	3	18	inferred	Q6ZPE2	Q6ZPE2|MTMR5_MOUSE Myotubularin-related protein 5 OS=Mus musculus OX=10090 GN=Sbf1 PE=1 SV=2
old/young	0.112	0.594406	0.225917	1496.12	0.823	3	6	inferred	Q80VP9	Q80VP9|ASPH2_MOUSE Aspartate beta-hydroxylase domain-containing protein 2 OS=Mus musculus OX=10090 GN=Asphd2 PE=1 SV=1
old/young	0.156	0.595405	0.225188	1498.63	0.823	3	2	inferred	Q9CR16	Q9CR16|PPID_MOUSE Peptidyl-prolyl cis-trans isomerase D OS=Mus musculus OX=10090 GN=Ppid PE=1 SV=3
old/young	0.099	0.595405	0.225188	1498.63	0.823	3	18	inferred	Q9DBG6	Q9DBG6|RPN2_MOUSE Dolichyl-diphosphooligosaccharide--protein glycosyltransferase subunit 2 OS=Mus musculus OX=10090 GN=Rpn2 PE=1 SV=1
old/young	-0.095	0.597403	0.223733	1503.66	0.823	3	26	inferred	Q8BPN8	Q8BPN8|DMXL2_MOUSE DmX-like protein 2 OS=Mus musculus OX=10090 GN=Dmxl2 PE=1 SV=3
old/young	0.249	0.598402	0.223007	1506.18	0.823	1	2	inferred	B1AWC9	B1AWC9|B1AWC9_MOUSE Phosphodiesterase OS=Mus musculus OX=10090 GN=Pde4b PE=1 SV=1
old/young	-0.196	0.598402	0.223007	1506.18	0.823	2	1	inferred	P63087	P63087|PP1G_MOUSE Serine/threonine-protein phosphatase PP1-gamma catalytic subunit OS=Mus musculus OX=10090 GN=Ppp1cc PE=1 SV=1
old/young	-0.167	0.598402	0.223007	1506.18	0.823	3	1	unresolved	Q0VF55;S4R1C4	Q0VF55|Q0VF55_MOUSE Calcium-transporting ATPase OS=Mus musculus OX=10090 GN=Atp2b3 PE=1 SV=1
old/young	-0.113	0.603397	0.219397	1518.75	0.823	3	6	inferred	P98200	P98200|AT8A2_MOUSE Phospholipid-transporting ATPase IB OS=Mus musculus OX=10090 GN=Atp8a2 PE=1 SV=1
old/young	0.195	0.604396	0.218679	1521.26	0.823	3	1	inferred	G5E8K5	G5E8K5|ANK3_MOUSE Ankyrin-3 OS=Mus musculus OX=10090 GN=Ank3 PE=1 SV=1
old/young	0.144	0.604396	0.218679	1521.26	0.823	3	2	inferred	Q80TN4	Q80TN4|DJC16_MOUSE DnaJ homolog subfamily C member 16 OS=Mus musculus OX=10090 GN=Dnajc16 PE=1 SV=2
old/young	-0.135	0.605395	0.217961	1523.78	0.823	3	4	inferred	Q8R5H6	Q8R5H6|WASF1_MOUSE Wiskott-Aldrich syndrome protein family member 1 OS=Mus musculus OX=10090 GN=Wasf1 PE=1 SV=2
old/young	-0.119	0.606394	0.217245	1526.29	0.823	3	7	inferred	E9Q2E4	E9Q2E4|E9Q2E4_MOUSE HECT domain E3 ubiquitin protein ligase 4 OS=Mus musculus OX=10090 GN=Hectd4 PE=1 SV=2
old/young	-0.448	0.607393	0.21653	1528.81	0.823	1	1	inferred	Q80VD1	Q80VD1|FA98B_MOUSE Protein FAM98B OS=Mus musculus OX=10090 GN=Fam98b PE=1 SV=1
old/young	0.115	0.607393	0.21653	1528.81	0.823	3	5	inferred	Q9Z1L5	Q9Z1L5|CA2D3_MOUSE Voltage-dependent calcium channel subunit alpha-2/delta-3 OS=Mus musculus OX=10090 GN=Cacna2d3 PE=1 SV=1
old/young	0.584	0.571429	0.243038	1438.29	0.824	3	2	inferred	Q9DBX6	Q9DBX6|CP2S1_MOUSE Cytochrome P450 2S1 OS=Mus musculus OX=10090 GN=Cyp2s1 PE=1 SV=1
old/young	-0.954	0.585415	0.232536	1473.49	0.824	3	3	inferred	P18872	P18872|GNAO_MOUSE Guanine nucleotide-binding protein G(o) subunit alpha OS=Mus musculus OX=10090 GN=Gnao1 PE=1 SV=3
old/young	0.141	0.586414	0.231796	1476	0.824	3	2	inferred	P47809	P47809|MP2K4_MOUSE Dual specificity mitogen-activated protein kinase kinase 4 OS=Mus musculus OX=10090 GN=Map2k4 PE=1 SV=2
old/young	-0.115	0.586414	0.231796	1476	0.824	3	5	inferred	Q9ET30	Q9ET30|TM9S3_MOUSE Transmembrane 9 superfamily member 3 OS=Mus musculus OX=10090 GN=Tm9sf3 PE=1 SV=1
old/young	0.144	0.587413	0.231057	1478.52	0.824	3	2	unresolved	G5E863;P23819-3;Q7TNB5	G5E863|G5E863_MOUSE Glutamate receptor 4 OS=Mus musculus OX=10090 GN=Gria4 PE=1 SV=1
old/young	0.106	0.587413	0.231057	1478.52	0.824	3	8	unresolved	P07901;P11499	P07901|HS90A_MOUSE Heat shock protein HSP 90-alpha OS=Mus musculus OX=10090 GN=Hsp90aa1 PE=1 SV=4
old/young	-0.108	0.588412	0.230319	1481.03	0.824	3	17	unresolved	A0A1D5RLD8;P16858	A0A1D5RLD8|A0A1D5RLD8_MOUSE Glyceraldehyde-3-phosphate dehydrogenase OS=Mus musculus OX=10090 GN=Gm10358 PE=1 SV=1
old/young	0.255	0.589411	0.229582	1483.55	0.824	2	1	inferred	O55042	O55042|SYUA_MOUSE Alpha-synuclein OS=Mus musculus OX=10090 GN=Snca PE=1 SV=2
old/young	0.194	0.59041	0.228847	1486.06	0.824	3	1	inferred	rev_Q69Z99	Q69Z99|ZN512_MOUSE reversed Zinc finger protein 512 OS=Mus musculus OX=10090 GN=Znf512 PE=2 SV=2
old/young	-0.108	0.599401	0.222283	1508.69	0.824	3	8	inferred	P62918	P62918|RL8_MOUSE 60S ribosomal protein L8 OS=Mus musculus OX=10090 GN=Rpl8 PE=1 SV=2
old/young	0.409	0.6004	0.22156	1511.21	0.824	1	1	inferred	Q8BH73	Q8BH73|QPCTL_MOUSE Glutaminyl-peptide cyclotransferase-like protein OS=Mus musculus OX=10090 GN=Qpctl PE=1 SV=1
old/young	0.132	0.6004	0.22156	1511.21	0.824	3	5	inferred	P68510	P68510|1433F_MOUSE 14-3-3 protein eta OS=Mus musculus OX=10090 GN=Ywhah PE=1 SV=2
old/young	-0.359	0.601399	0.220838	1513.72	0.824	3	20	inferred	Q6ZQ38	Q6ZQ38|CAND1_MOUSE Cullin-associated NEDD8-dissociated protein 1 OS=Mus musculus OX=10090 GN=Cand1 PE=1 SV=2
old/young	0.188	0.602398	0.220117	1516.23	0.824	3	2	unresolved	E9QPE7;Q5SV64;Q61879;Q8VDD5	E9QPE7|E9QPE7_MOUSE Myosin-11 OS=Mus musculus OX=10090 GN=Myh11 PE=1 SV=1
old/young	-0.144	0.602398	0.220117	1516.23	0.824	3	1	unresolved	E9QPE7;Q8VDD5	E9QPE7|E9QPE7_MOUSE Myosin-11 OS=Mus musculus OX=10090 GN=Myh11 PE=1 SV=1
old/young	-0.192	0.603397	0.219397	1518.75	0.824	3	1	inferred	Q6NS52	Q6NS52|DGKB_MOUSE Diacylglycerol kinase beta OS=Mus musculus OX=10090 GN=Dgkb PE=1 SV=2
old/young	0.155	0.603397	0.219397	1518.75	0.824	3	1	inferred	Q3TWF6	Q3TWF6|WDR70_MOUSE WD repeat-containing protein 70 OS=Mus musculus OX=10090 GN=Wdr70 PE=1 SV=1
old/young	0.183	0.604396	0.218679	1521.26	0.824	3	1	inferred	Q9CPV9	Q9CPV9|P2Y12_MOUSE P2Y purinoceptor 12 OS=Mus musculus OX=10090 GN=P2ry12 PE=1 SV=1
old/young	-0.169	0.604396	0.218679	1521.26	0.824	3	1	inferred	Q9CQN1	Q9CQN1|TRAP1_MOUSE Heat shock protein 75 kDa, mitochondrial OS=Mus musculus OX=10090 GN=Trap1 PE=1 SV=1
old/young	0.192	0.605395	0.217961	1523.78	0.824	2	1	unresolved	P55258;P61028;P62823;P63011;Q9CZT8;Q9DD03	P55258|RAB8A_MOUSE Ras-related protein Rab-8A OS=Mus musculus OX=10090 GN=Rab8a PE=1 SV=2
old/young	0.167	0.606394	0.217245	1526.29	0.824	3	1	inferred	G5E895	G5E895|G5E895_MOUSE Aldo-keto reductase family 1, member B10 (aldose reductase) OS=Mus musculus OX=10090 GN=Akr1b10 PE=1 SV=1
old/young	0.092	0.606394	0.217245	1526.29	0.824	3	8	inferred	P42669	P42669|PURA_MOUSE Transcriptional activator protein Pur-alpha OS=Mus musculus OX=10090 GN=Pura PE=1 SV=1
old/young	0.192	0.607393	0.21653	1528.81	0.824	3	1	inferred	Q9JLZ3	Q9JLZ3|AUHM_MOUSE Methylglutaconyl-CoA hydratase, mitochondrial OS=Mus musculus OX=10090 GN=Auh PE=1 SV=1
old/young	-0.102	0.607393	0.21653	1528.81	0.824	3	8	inferred	P60122	P60122|RUVB1_MOUSE RuvB-like 1 OS=Mus musculus OX=10090 GN=Ruvbl1 PE=1 SV=1
old/young	0.086	0.608392	0.215817	1531.32	0.824	3	22	inferred	Q9Z0E0	Q9Z0E0|NCDN_MOUSE Neurochondrin OS=Mus musculus OX=10090 GN=Ncdn PE=1 SV=1
old/young	-0.167	0.601399	0.220838	1513.72	0.825	3	1	inferred	rev_E9QN44	E9QN44|E9QN44_MOUSE reversed D-2-hydroxyglutarate dehydrogenase, mitochondrial OS=Mus musculus OX=10090 GN=D2hgdh PE=1 SV=1
old/young	0.128	0.602398	0.220117	1516.23	0.825	3	5	inferred	Q8CI71	Q8CI71|VPS50_MOUSE Syndetin OS=Mus musculus OX=10090 GN=Vps50 PE=1 SV=2
old/young	-0.115	0.602398	0.220117	1516.23	0.825	3	13	inferred	Q3U1J4	Q3U1J4|DDB1_MOUSE DNA damage-binding protein 1 OS=Mus musculus OX=10090 GN=Ddb1 PE=1 SV=2
old/young	0.169	0.603397	0.219397	1518.75	0.825	3	2	inferred	Q8BMK4	Q8BMK4|CKAP4_MOUSE Cytoskeleton-associated protein 4 OS=Mus musculus OX=10090 GN=Ckap4 PE=1 SV=2
old/young	0.128	0.603397	0.219397	1518.75	0.825	3	4	inferred	F6SEU4	F6SEU4|SYGP1_MOUSE Ras/Rap GTPase-activating protein SynGAP OS=Mus musculus OX=10090 GN=Syngap1 PE=1 SV=2
old/young	0.17	0.609391	0.215104	1533.84	0.825	3	1	inferred	O09114	O09114|PTGDS_MOUSE Prostaglandin-H2 D-isomerase OS=Mus musculus OX=10090 GN=Ptgds PE=1 SV=1
old/young	0.162	0.61039	0.214393	1536.35	0.825	3	1	inferred	P43274	P43274|H14_MOUSE Histone H1.4 OS=Mus musculus OX=10090 GN=Hist1h1e PE=1 SV=2
old/young	0.109	0.61039	0.214393	1536.35	0.826	3	5	inferred	Q9JKC6	Q9JKC6|CEND_MOUSE Cell cycle exit and neuronal differentiation protein 1 OS=Mus musculus OX=10090 GN=Cend1 PE=1 SV=1
old/young	-0.248	0.611389	0.213683	1538.87	0.826	3	35	inferred	Q62261	Q62261|SPTB2_MOUSE Spectrin beta chain, non-erythrocytic 1 OS=Mus musculus OX=10090 GN=Sptbn1 PE=1 SV=2
old/young	-0.095	0.611389	0.213683	1538.87	0.826	3	12	inferred	Q5XJF6	Q5XJF6|Q5XJF6_MOUSE Ribosomal protein OS=Mus musculus OX=10090 GN=Rpl10a PE=1 SV=1
old/young	0.181	0.612388	0.212974	1541.38	0.826	3	1	inferred	Q9CUN6	Q9CUN6|SMUF1_MOUSE E3 ubiquitin-protein ligase SMURF1 OS=Mus musculus OX=10090 GN=Smurf1 PE=1 SV=2
old/young	0.177	0.616384	0.210149	1551.44	0.826	2	2	inferred	Q8BTG7	Q8BTG7|NDRG4_MOUSE Protein NDRG4 OS=Mus musculus OX=10090 GN=Ndrg4 PE=1 SV=1
old/young	0.099	0.616384	0.210149	1551.44	0.826	3	7	unresolved	Q7M6W1;Q8K0T0	Q7M6W1|Q7M6W1_MOUSE Reticulon OS=Mus musculus OX=10090 GN=Rtn1 PE=1 SV=1
old/young	-1.1	0.613387	0.212266	1543.89	0.827	3	1	unresolved	Q3TES0;Q5DU25;Q8R0S2	Q3TES0|IQEC3_MOUSE IQ motif and SEC7 domain-containing protein 3 OS=Mus musculus OX=10090 GN=Iqsec3 PE=1 SV=1
old/young	0.247	0.613387	0.212266	1543.89	0.827	2	1	inferred	P53986	P53986|MOT1_MOUSE Monocarboxylate transporter 1 OS=Mus musculus OX=10090 GN=Slc16a1 PE=1 SV=1
old/young	0.143	0.614386	0.211559	1546.41	0.827	3	2	inferred	Q6P4T1	Q6P4T1|SNX19_MOUSE Sorting nexin-19 OS=Mus musculus OX=10090 GN=Snx19 PE=1 SV=1
old/young	0.102	0.614386	0.211559	1546.41	0.827	3	6	unresolved	P17156;P63017	P17156|HSP72_MOUSE Heat shock-related 70 kDa protein 2 OS=Mus musculus OX=10090 GN=Hspa2 PE=1 SV=2
old/young	0.192	0.615385	0.210853	1548.92	0.827	2	1	inferred	Q61070	Q61070|EI24_MOUSE Etoposide-induced protein 2.4 OS=Mus musculus OX=10090 GN=Ei24 PE=1 SV=3
old/young	0.201	0.616384	0.210149	1551.44	0.827	3	1	inferred	Q8VHI6	Q8VHI6|WASF3_MOUSE Wiskott-Aldrich syndrome protein family member 3 OS=Mus musculus OX=10090 GN=Wasf3 PE=1 SV=1
old/young	0.112	0.616384	0.210149	1551.44	0.827	3	7	inferred	B9EJ86	B9EJ86|OSBL8_MOUSE Oxysterol-binding protein-related protein 8 OS=Mus musculus OX=10090 GN=Osbpl8 PE=1 SV=1
old/young	-0.098	0.616384	0.210149	1551.44	0.827	3	7	inferred	Q3TFD2	Q3TFD2|PCAT1_MOUSE Lysophosphatidylcholine acyltransferase 1 OS=Mus musculus OX=10090 GN=Lpcat1 PE=1 SV=1
old/young	-0.156	0.617383	0.209446	1553.95	0.827	3	2	inferred	P61315	P61315|G3ST3_MOUSE Galactose-3-O-sulfotransferase 3 OS=Mus musculus OX=10090 GN=Gal3st3 PE=2 SV=1
old/young	0.245	0.618382	0.208743	1556.47	0.827	2	1	inferred	Q9R0A0	Q9R0A0|PEX14_MOUSE Peroxisomal membrane protein PEX14 OS=Mus musculus OX=10090 GN=Pex14 PE=1 SV=1
old/young	0.121	0.618382	0.208743	1556.47	0.827	3	4	inferred	Q924N4	Q924N4|S12A6_MOUSE Solute carrier family 12 member 6 OS=Mus musculus OX=10090 GN=Slc12a6 PE=1 SV=2
old/young	0.094	0.618382	0.208743	1556.47	0.827	3	9	inferred	Q91VA7	Q91VA7|Q91VA7_MOUSE Isocitrate dehydrogenase [NAD] subunit, mitochondrial OS=Mus musculus OX=10090 GN=Idh3b PE=1 SV=1
old/young	0.469	0.619381	0.208042	1558.98	0.827	3	3	inferred	Q80YA9	Q80YA9|CNKR2_MOUSE Connector enhancer of kinase suppressor of ras 2 OS=Mus musculus OX=10090 GN=Cnksr2 PE=1 SV=1
old/young	-0.165	0.619381	0.208042	1558.98	0.827	3	1	inferred	A0A0A6YXZ9	A0A0A6YXZ9|A0A0A6YXZ9_MOUSE Protocadherin gamma subfamily C, 5 (Fragment) OS=Mus musculus OX=10090 GN=Pcdhgc5 PE=4 SV=1
old/young	0.133	0.619381	0.208042	1558.98	0.827	3	2	unresolved	Q922F4;Q9ERD7	Q922F4|TBB6_MOUSE Tubulin beta-6 chain OS=Mus musculus OX=10090 GN=Tubb6 PE=1 SV=1
old/young	0.105	0.62038	0.207342	1561.5	0.827	3	7	inferred	Q9WV55	Q9WV55|VAPA_MOUSE Vesicle-associated membrane protein-associated protein A OS=Mus musculus OX=10090 GN=Vapa PE=1 SV=2
old/young	-0.13	0.614386	0.211559	1546.41	0.828	3	3	inferred	A0A0G2JGJ1	A0A0G2JGJ1|A0A0G2JGJ1_MOUSE Dihydropteridine reductase OS=Mus musculus OX=10090 GN=Qdpr PE=1 SV=1
old/young	-0.131	0.615385	0.210853	1548.92	0.828	3	3	inferred	P62849	P62849|RS24_MOUSE 40S ribosomal protein S24 OS=Mus musculus OX=10090 GN=Rps24 PE=1 SV=1
old/young	-0.301	0.616384	0.210149	1551.44	0.828	2	1	inferred	Q99MX7	Q99MX7|T121B_MOUSE Transmembrane protein 121B OS=Mus musculus OX=10090 GN=Tmem121b PE=1 SV=1
old/young	0.154	0.616384	0.210149	1551.44	0.828	3	1	unresolved	Q60714;Q91VE0	Q60714|S27A1_MOUSE Long-chain fatty acid transport protein 1 OS=Mus musculus OX=10090 GN=Slc27a1 PE=1 SV=1
old/young	0.129	0.62038	0.207342	1561.5	0.828	3	4	inferred	Q6PGE7	Q6PGE7|SC6A7_MOUSE Sodium-dependent proline transporter OS=Mus musculus OX=10090 GN=Slc6a7 PE=1 SV=1
old/young	0.182	0.621379	0.206644	1564.01	0.828	2	1	inferred	P59279	P59279|RAB2B_MOUSE Ras-related protein Rab-2B OS=Mus musculus OX=10090 GN=Rab2b PE=1 SV=1
old/young	0.163	0.623377	0.205249	1569.04	0.828	3	1	inferred	Q9WV91	Q9WV91|FPRP_MOUSE Prostaglandin F2 receptor negative regulator OS=Mus musculus OX=10090 GN=Ptgfrn PE=1 SV=2
old/young	0.122	0.624376	0.204554	1571.55	0.828	3	3	inferred	Q923T9	Q923T9|KCC2G_MOUSE Calcium/calmodulin-dependent protein kinase type II subunit gamma OS=Mus musculus OX=10090 GN=Camk2g PE=1 SV=1
old/young	0.115	0.624376	0.204554	1571.55	0.828	3	2	unresolved	Q91V14;Q924N4	Q91V14|S12A5_MOUSE Solute carrier family 12 member 5 OS=Mus musculus OX=10090 GN=Slc12a5 PE=1 SV=2
old/young	0.193	0.625375	0.20386	1574.07	0.828	2	1	inferred	Q99K23	Q99K23|UFSP2_MOUSE Ufm1-specific protease 2 OS=Mus musculus OX=10090 GN=Ufsp2 PE=1 SV=1
old/young	0.14	0.625375	0.20386	1574.07	0.828	3	3	inferred	Q14C51	Q14C51|PTCD3_MOUSE Pentatricopeptide repeat domain-containing protein 3, mitochondrial OS=Mus musculus OX=10090 GN=Ptcd3 PE=1 SV=2
old/young	-0.121	0.626374	0.203167	1576.58	0.828	3	2	unresolved	O08553;P97427;Q62188	O08553|DPYL2_MOUSE Dihydropyrimidinase-related protein 2 OS=Mus musculus OX=10090 GN=Dpysl2 PE=1 SV=2
old/young	0.129	0.622378	0.205946	1566.52	0.829	3	3	inferred	Q3V1U8	Q3V1U8|ELMD1_MOUSE ELMO domain-containing protein 1 OS=Mus musculus OX=10090 GN=Elmod1 PE=1 SV=2
old/young	0.317	0.623377	0.205249	1569.04	0.829	1	1	inferred	Q9CQ45	Q9CQ45|NENF_MOUSE Neudesin OS=Mus musculus OX=10090 GN=Nenf PE=1 SV=1
old/young	0.175	0.623377	0.205249	1569.04	0.829	3	1	inferred	Q69ZN6	Q69ZN6|GNPTA_MOUSE N-acetylglucosamine-1-phosphotransferase subunits alpha/beta OS=Mus musculus OX=10090 GN=Gnptab PE=2 SV=2
old/young	-0.198	0.624376	0.204554	1571.55	0.829	3	1	inferred	Q9JL26	Q9JL26|FMNL1_MOUSE Formin-like protein 1 OS=Mus musculus OX=10090 GN=Fmnl1 PE=1 SV=1
old/young	0.14	0.624376	0.204554	1571.55	0.829	3	2	inferred	Q80TA1	Q80TA1|EPT1_MOUSE Ethanolaminephosphotransferase 1 OS=Mus musculus OX=10090 GN=Selenoi PE=2 SV=3
old/young	0.122	0.625375	0.20386	1574.07	0.829	3	4	inferred	Q9WV34	Q9WV34|MPP2_MOUSE MAGUK p55 subfamily member 2 OS=Mus musculus OX=10090 GN=Mpp2 PE=1 SV=1
old/young	-0.096	0.626374	0.203167	1576.58	0.829	3	7	inferred	Q8CFX3	Q8CFX3|Q8CFX3_MOUSE Protocadherin 1 OS=Mus musculus OX=10090 GN=Pcdh1 PE=1 SV=1
old/young	-0.359	0.627373	0.202474	1579.1	0.829	3	6	inferred	Q9R0Q6	Q9R0Q6|ARC1A_MOUSE Actin-related protein 2/3 complex subunit 1A OS=Mus musculus OX=10090 GN=Arpc1a PE=1 SV=1
old/young	0.114	0.627373	0.202474	1579.1	0.829	3	3	inferred	Q9Z1X2	Q9Z1X2|PTSS2_MOUSE Phosphatidylserine synthase 2 OS=Mus musculus OX=10090 GN=Ptdss2 PE=1 SV=2
old/young	0.115	0.623377	0.205249	1569.04	0.83	3	6	inferred	Q8BHL5	Q8BHL5|ELMO2_MOUSE Engulfment and cell motility protein 2 OS=Mus musculus OX=10090 GN=Elmo2 PE=1 SV=1
old/young	-0.094	0.628372	0.201783	1581.61	0.83	3	8	inferred	Q8R1Q8	Q8R1Q8|DC1L1_MOUSE Cytoplasmic dynein 1 light intermediate chain 1 OS=Mus musculus OX=10090 GN=Dync1li1 PE=1 SV=1
old/young	-0.182	0.63037	0.200405	1586.64	0.832	3	1	inferred	Q3UUI3	Q3UUI3|THEM4_MOUSE Acyl-coenzyme A thioesterase THEM4 OS=Mus musculus OX=10090 GN=Them4 PE=1 SV=1
old/young	-0.095	0.63037	0.200405	1586.64	0.832	3	16	inferred	Q8C522	Q8C522|ENDD1_MOUSE Endonuclease domain-containing 1 protein OS=Mus musculus OX=10090 GN=Endod1 PE=1 SV=2
old/young	0.148	0.631369	0.199717	1589.15	0.832	3	1	inferred	Q4PZA2	Q4PZA2|ECE1_MOUSE Endothelin-converting enzyme 1 OS=Mus musculus OX=10090 GN=Ece1 PE=1 SV=1
old/young	0.147	0.631369	0.199717	1589.15	0.832	3	1	inferred	Q9D6M3	Q9D6M3|GHC1_MOUSE Mitochondrial glutamate carrier 1 OS=Mus musculus OX=10090 GN=Slc25a22 PE=1 SV=1
old/young	-0.098	0.631369	0.199717	1589.15	0.832	3	8	inferred	Q9DBS2	Q9DBS2|TPRGL_MOUSE Tumor protein p63-regulated gene 1-like protein OS=Mus musculus OX=10090 GN=Tprg1l PE=1 SV=1
old/young	-0.212	0.632368	0.19903	1591.67	0.832	2	1	inferred	Q812A2	Q812A2|SRGP3_MOUSE SLIT-ROBO Rho GTPase-activating protein 3 OS=Mus musculus OX=10090 GN=Srgap3 PE=1 SV=1
old/young	0.165	0.632368	0.19903	1591.67	0.832	3	1	inferred	Q9JIM1	Q9JIM1|S29A1_MOUSE Equilibrative nucleoside transporter 1 OS=Mus musculus OX=10090 GN=Slc29a1 PE=1 SV=3
old/young	0.105	0.634366	0.19766	1596.7	0.834	3	5	inferred	P20357	P20357|MTAP2_MOUSE Microtubule-associated protein 2 OS=Mus musculus OX=10090 GN=Map2 PE=1 SV=2
old/young	0.151	0.635365	0.196977	1599.21	0.834	3	1	inferred	Q6NXK9	Q6NXK9|Q6NXK9_MOUSE alpha-1,2-Mannosidase OS=Mus musculus OX=10090 GN=Man1c1 PE=1 SV=1
old/young	0.085	0.635365	0.196977	1599.21	0.834	3	20	inferred	Q9Z268	Q9Z268|RASL1_MOUSE RasGAP-activating-like protein 1 OS=Mus musculus OX=10090 GN=Rasal1 PE=1 SV=2
old/young	0.181	0.636364	0.196295	1601.73	0.834	3	1	inferred	Q9Z1R4	Q9Z1R4|CF047_MOUSE Uncharacterized protein C6orf47 homolog OS=Mus musculus OX=10090 GN=D17h6s53e PE=1 SV=1
old/young	0.098	0.636364	0.196295	1601.73	0.834	3	11	inferred	Q80U28-14	Q80U28-14|MADD_MOUSE Isoform 14 of MAP kinase-activating death domain protein OS=Mus musculus OX=10090 GN=Madd
old/young	-0.17	0.635365	0.196977	1599.21	0.835	3	1	inferred	A0A0A6YW65	A0A0A6YW65|A0A0A6YW65_MOUSE Transmembrane protein 131 (Fragment) OS=Mus musculus OX=10090 GN=Tmem131 PE=4 SV=1
old/young	0.154	0.635365	0.196977	1599.21	0.835	3	1	inferred	Q8CHH9	Q8CHH9|SEPT8_MOUSE Septin-8 OS=Mus musculus OX=10090 GN=Sept8 PE=1 SV=4
old/young	0.144	0.636364	0.196295	1601.73	0.835	3	1	inferred	Q8CGF5	Q8CGF5|TMM56_MOUSE Transmembrane protein 56 OS=Mus musculus OX=10090 GN=Tmem56 PE=2 SV=1
old/young	0.092	0.637363	0.195613	1604.24	0.835	3	7	inferred	P59999	P59999|ARPC4_MOUSE Actin-related protein 2/3 complex subunit 4 OS=Mus musculus OX=10090 GN=Arpc4 PE=1 SV=3
old/young	0.104	0.643357	0.191548	1619.33	0.835	3	7	inferred	P35980	P35980|RL18_MOUSE 60S ribosomal protein L18 OS=Mus musculus OX=10090 GN=Rpl18 PE=1 SV=3
old/young	-0.154	0.638362	0.194933	1606.76	0.836	3	1	inferred	Q99KQ4	Q99KQ4|NAMPT_MOUSE Nicotinamide phosphoribosyltransferase OS=Mus musculus OX=10090 GN=Nampt PE=1 SV=1
old/young	0.099	0.639361	0.194254	1609.27	0.836	3	8	unresolved	P48962;P51881	P48962|ADT1_MOUSE ADP/ATP translocase 1 OS=Mus musculus OX=10090 GN=Slc25a4 PE=1 SV=4
old/young	-0.17	0.641359	0.192899	1614.3	0.836	3	1	inferred	Q8C0P5	Q8C0P5|COR2A_MOUSE Coronin-2A OS=Mus musculus OX=10090 GN=Coro2a PE=2 SV=1
old/young	0.129	0.641359	0.192899	1614.3	0.836	3	2	inferred	P70670	P70670|NACAM_MOUSE Nascent polypeptide-associated complex subunit alpha, muscle-specific form OS=Mus musculus OX=10090 GN=Naca PE=1 SV=2
old/young	-0.165	0.642358	0.192223	1616.81	0.836	2	2	inferred	P04925	P04925|PRIO_MOUSE Major prion protein OS=Mus musculus OX=10090 GN=Prnp PE=1 SV=2
old/young	0.36	0.643357	0.191548	1619.33	0.836	1	1	inferred	rev_Q5SZV5	Q5SZV5|K0319_MOUSE reversed Dyslexia-associated protein KIAA0319 homolog OS=Mus musculus OX=10090 GN=Kiaa0319 PE=1 SV=1
old/young	-0.124	0.643357	0.191548	1619.33	0.836	3	3	unresolved	Q68FL4;Q80SW1	Q68FL4|SAHH3_MOUSE Putative adenosylhomocysteinase 3 OS=Mus musculus OX=10090 GN=Ahcyl2 PE=1 SV=1
old/young	0.1	0.643357	0.191548	1619.33	0.836	3	6	inferred	Q922Q8	Q922Q8|LRC59_MOUSE Leucine-rich repeat-containing protein 59 OS=Mus musculus OX=10090 GN=Lrrc59 PE=1 SV=1
old/young	-4.266	0.644356	0.190874	1621.84	0.836	2	1	inferred	Q8R5M8	Q8R5M8|CADM1_MOUSE Cell adhesion molecule 1 OS=Mus musculus OX=10090 GN=Cadm1 PE=1 SV=2
old/young	0.17	0.644356	0.190874	1621.84	0.836	2	1	inferred	P62305	P62305|RUXE_MOUSE Small nuclear ribonucleoprotein E OS=Mus musculus OX=10090 GN=Snrpe PE=1 SV=1
old/young	0.152	0.645355	0.190202	1624.36	0.836	3	3	inferred	Q6ZPQ6	Q6ZPQ6|PITM2_MOUSE Membrane-associated phosphatidylinositol transfer protein 2 OS=Mus musculus OX=10090 GN=Pitpnm2 PE=1 SV=2
old/young	-0.152	0.645355	0.190202	1624.36	0.836	3	2	inferred	Q9D1X9	Q9D1X9|TM50B_MOUSE Transmembrane protein 50B OS=Mus musculus OX=10090 GN=Tmem50b PE=1 SV=1
old/young	0.213	0.64036	0.193576	1611.79	0.837	2	1	unresolved	P10630;P60843;Q91VC3	P10630|IF4A2_MOUSE Eukaryotic initiation factor 4A-II OS=Mus musculus OX=10090 GN=Eif4a2 PE=1 SV=2
old/young	-0.172	0.64036	0.193576	1611.79	0.837	2	1	inferred	Q9R0M6	Q9R0M6|RAB9A_MOUSE Ras-related protein Rab-9A OS=Mus musculus OX=10090 GN=Rab9a PE=1 SV=1
old/young	-0.15	0.641359	0.192899	1614.3	0.837	3	1	inferred	O88291	O88291|ZN326_MOUSE DBIRD complex subunit ZNF326 OS=Mus musculus OX=10090 GN=Znf326 PE=1 SV=1
old/young	0.13	0.641359	0.192899	1614.3	0.837	3	4	inferred	G3X9Y1	G3X9Y1|G3X9Y1_MOUSE Synaptotagmin III, isoform CRA_a OS=Mus musculus OX=10090 GN=Syt3 PE=1 SV=1
old/young	0.212	0.642358	0.192223	1616.81	0.837	2	1	inferred	Q3UH68	Q3UH68|LIMC1_MOUSE LIM and calponin homology domains-containing protein 1 OS=Mus musculus OX=10090 GN=Limch1 PE=1 SV=2
old/young	0.165	0.643357	0.191548	1619.33	0.837	2	1	inferred	Q9JI19	Q9JI19|FIBP_MOUSE Acidic fibroblast growth factor intracellular-binding protein OS=Mus musculus OX=10090 GN=Fibp PE=1 SV=1
old/young	-0.092	0.643357	0.191548	1619.33	0.837	3	8	inferred	P08226	P08226|APOE_MOUSE Apolipoprotein E OS=Mus musculus OX=10090 GN=Apoe PE=1 SV=2
old/young	0.116	0.641359	0.192899	1614.3	0.838	3	3	unresolved	P10630;P60843	P10630|IF4A2_MOUSE Eukaryotic initiation factor 4A-II OS=Mus musculus OX=10090 GN=Eif4a2 PE=1 SV=2
old/young	0.136	0.647353	0.188859	1629.39	0.838	3	3	inferred	P63158	P63158|HMGB1_MOUSE High mobility group protein B1 OS=Mus musculus OX=10090 GN=Hmgb1 PE=1 SV=2
old/young	0.074	0.647353	0.188859	1629.39	0.838	3	31	inferred	P20029	P20029|BIP_MOUSE Endoplasmic reticulum chaperone BiP OS=Mus musculus OX=10090 GN=Hspa5 PE=1 SV=3
old/young	0.123	0.648352	0.188189	1631.9	0.839	3	3	inferred	Q99J27	Q99J27|ACATN_MOUSE Acetyl-coenzyme A transporter 1 OS=Mus musculus OX=10090 GN=Slc33a1 PE=1 SV=1
old/young	-0.172	0.649351	0.187521	1634.42	0.839	3	2	inferred	Q9QYC0	Q9QYC0|ADDA_MOUSE Alpha-adducin OS=Mus musculus OX=10090 GN=Add1 PE=1 SV=2
old/young	0.155	0.649351	0.187521	1634.42	0.839	3	1	unresolved	Q9JLB0;Q9WV34	Q9JLB0|MPP6_MOUSE MAGUK p55 subfamily member 6 OS=Mus musculus OX=10090 GN=Mpp6 PE=1 SV=1
old/young	0.109	0.649351	0.187521	1634.42	0.839	3	4	inferred	O70435	O70435|PSA3_MOUSE Proteasome subunit alpha type-3 OS=Mus musculus OX=10090 GN=Psma3 PE=1 SV=3
old/young	0.11	0.65035	0.186853	1636.93	0.839	3	8	inferred	P51881	P51881|ADT2_MOUSE ADP/ATP translocase 2 OS=Mus musculus OX=10090 GN=Slc25a5 PE=1 SV=3
old/young	0.154	0.651349	0.186186	1639.44	0.84	3	1	inferred	rev_Q8BYC6	Q8BYC6|TAOK3_MOUSE reversed Serine/threonine-protein kinase TAO3 OS=Mus musculus OX=10090 GN=Taok3 PE=1 SV=2
old/young	-0.124	0.651349	0.186186	1639.44	0.84	3	3	unresolved	A2AGL3;E9Q401	A2AGL3|RYR3_MOUSE Ryanodine receptor 3 OS=Mus musculus OX=10090 GN=Ryr3 PE=1 SV=1
old/young	-0.108	0.653347	0.184856	1644.47	0.84	3	2	inferred	P63325	P63325|RS10_MOUSE 40S ribosomal protein S10 OS=Mus musculus OX=10090 GN=Rps10 PE=1 SV=1
old/young	-0.128	0.654346	0.184193	1646.99	0.84	3	2	inferred	Q91WB2	Q91WB2|PLPP7_MOUSE Inactive phospholipid phosphatase 7 OS=Mus musculus OX=10090 GN=Plpp7 PE=1 SV=1
old/young	0.162	0.655345	0.18353	1649.5	0.84	3	1	unresolved	Q8BT60;Q8C166	Q8BT60|CPNE3_MOUSE Copine-3 OS=Mus musculus OX=10090 GN=Cpne3 PE=1 SV=2
old/young	0.108	0.655345	0.18353	1649.5	0.84	3	3	inferred	Q9WTR5	Q9WTR5|CAD13_MOUSE Cadherin-13 OS=Mus musculus OX=10090 GN=Cdh13 PE=1 SV=2
old/young	0.121	0.652348	0.185521	1641.96	0.841	3	2	inferred	Q6PB70	Q6PB70|ANO8_MOUSE Anoctamin-8 OS=Mus musculus OX=10090 GN=Ano8 PE=1 SV=3
old/young	0.123	0.653347	0.184856	1644.47	0.841	3	3	inferred	Q9CWS0	Q9CWS0|DDAH1_MOUSE N(G),N(G)-dimethylarginine dimethylaminohydrolase 1 OS=Mus musculus OX=10090 GN=Ddah1 PE=1 SV=3
old/young	-0.09	0.653347	0.184856	1644.47	0.841	3	17	inferred	Q810U3	Q810U3|NFASC_MOUSE Neurofascin OS=Mus musculus OX=10090 GN=Nfasc PE=1 SV=1
old/young	0.132	0.654346	0.184193	1646.99	0.841	3	2	inferred	Q9DBP5	Q9DBP5|KCY_MOUSE UMP-CMP kinase OS=Mus musculus OX=10090 GN=Cmpk1 PE=1 SV=1
old/young	0.097	0.654346	0.184193	1646.99	0.841	3	3	inferred	Q80TZ3	Q80TZ3|AUXI_MOUSE Putative tyrosine-protein phosphatase auxilin OS=Mus musculus OX=10090 GN=Dnajc6 PE=1 SV=2
old/young	-0.183	0.655345	0.18353	1649.5	0.841	3	1	inferred	Q3UHB1	Q3UHB1|NT5D3_MOUSE 5'-nucleotidase domain-containing protein 3 OS=Mus musculus OX=10090 GN=Nt5dc3 PE=1 SV=1
old/young	0.165	0.655345	0.18353	1649.5	0.841	3	1	inferred	rev_P97401	P97401|SFRP3_MOUSE reversed Secreted frizzled-related protein 3 OS=Mus musculus OX=10090 GN=Frzb PE=1 SV=1
old/young	-0.197	0.653347	0.184856	1644.47	0.842	2	1	inferred	Q61701	Q61701|ELAV4_MOUSE ELAV-like protein 4 OS=Mus musculus OX=10090 GN=Elavl4 PE=1 SV=1
old/young	0.179	0.657343	0.182208	1654.53	0.842	3	1	inferred	P70408	P70408|CAD10_MOUSE Cadherin-10 OS=Mus musculus OX=10090 GN=Cdh10 PE=1 SV=3
old/young	0.138	0.657343	0.182208	1654.53	0.842	3	1	unresolved	P14873;Q9QYR6	P14873|MAP1B_MOUSE Microtubule-associated protein 1B OS=Mus musculus OX=10090 GN=Map1b PE=1 SV=2
old/young	-0.184	0.658342	0.181549	1657.05	0.842	3	1	inferred	F6V0L2	F6V0L2|F6V0L2_MOUSE Alpha-protein kinase 1 (Fragment) OS=Mus musculus OX=10090 GN=Alpk1 PE=4 SV=8
old/young	-0.114	0.658342	0.181549	1657.05	0.842	3	3	unresolved	P17182;P17183;P21550	P17182|ENOA_MOUSE Alpha-enolase OS=Mus musculus OX=10090 GN=Eno1 PE=1 SV=3
old/young	-0.088	0.658342	0.181549	1657.05	0.842	3	10	inferred	Q9EPL2	Q9EPL2|CSTN1_MOUSE Calsyntenin-1 OS=Mus musculus OX=10090 GN=Clstn1 PE=1 SV=1
old/young	0.178	0.659341	0.18089	1659.56	0.842	3	1	inferred	P97478	P97478|COQ7_MOUSE 5-demethoxyubiquinone hydroxylase, mitochondrial OS=Mus musculus OX=10090 GN=Coq7 PE=1 SV=3
old/young	0.153	0.659341	0.18089	1659.56	0.842	3	1	inferred	Q80UF9	Q80UF9|OTOP3_MOUSE Proton channel OTOP3 OS=Mus musculus OX=10090 GN=Otop3 PE=2 SV=2
old/young	-0.122	0.66034	0.180233	1662.07	0.842	3	3	inferred	Q68FL6	Q68FL6|SYMC_MOUSE Methionine--tRNA ligase, cytoplasmic OS=Mus musculus OX=10090 GN=Mars PE=1 SV=1
old/young	0.194	0.661339	0.179576	1664.59	0.842	3	1	inferred	Q3THS6	Q3THS6|METK2_MOUSE S-adenosylmethionine synthase isoform type-2 OS=Mus musculus OX=10090 GN=Mat2a PE=1 SV=2
old/young	-0.104	0.66034	0.180233	1662.07	0.843	3	4	inferred	P70206	P70206|PLXA1_MOUSE Plexin-A1 OS=Mus musculus OX=10090 GN=Plxna1 PE=1 SV=1
old/young	-0.29	0.661339	0.179576	1664.59	0.843	1	1	inferred	Q8R555	Q8R555|CRAC1_MOUSE Cartilage acidic protein 1 OS=Mus musculus OX=10090 GN=Crtac1 PE=2 SV=1
old/young	-0.093	0.661339	0.179576	1664.59	0.843	3	10	inferred	Q9WUA3	Q9WUA3|PFKAP_MOUSE ATP-dependent 6-phosphofructokinase, platelet type OS=Mus musculus OX=10090 GN=Pfkp PE=1 SV=1
old/young	0.221	0.662338	0.178921	1667.1	0.843	2	1	inferred	Q5H8C4	Q5H8C4|VP13A_MOUSE Vacuolar protein sorting-associated protein 13A OS=Mus musculus OX=10090 GN=Vps13a PE=1 SV=1
old/young	0.138	0.662338	0.178921	1667.1	0.843	3	1	inferred	Q9JKL5	Q9JKL5|CHP3_MOUSE Calcineurin B homologous protein 3 OS=Mus musculus OX=10090 GN=Tesc PE=1 SV=2
old/young	0.185	0.68032	0.167287	1712.36	0.843	2	1	inferred	Q9JMC3	Q9JMC3|DNJA4_MOUSE DnaJ homolog subfamily A member 4 OS=Mus musculus OX=10090 GN=Dnaja4 PE=1 SV=1
old/young	-0.149	0.684316	0.164744	1722.42	0.843	3	1	inferred	Q69Z99	Q69Z99|ZN512_MOUSE Zinc finger protein 512 OS=Mus musculus OX=10090 GN=Znf512 PE=2 SV=2
old/young	0.104	0.663337	0.178266	1669.62	0.844	3	3	inferred	O35239	O35239|PTN9_MOUSE Tyrosine-protein phosphatase non-receptor type 9 OS=Mus musculus OX=10090 GN=Ptpn9 PE=1 SV=2
old/young	-0.176	0.675325	0.170487	1699.79	0.844	1	2	inferred	P34884	P34884|MIF_MOUSE Macrophage migration inhibitory factor OS=Mus musculus OX=10090 GN=Mif PE=1 SV=2
old/young	-0.124	0.675325	0.170487	1699.79	0.844	3	1	unresolved	E9QPE7;Q5SV64;Q61879;Q6URW6-3	E9QPE7|E9QPE7_MOUSE Myosin-11 OS=Mus musculus OX=10090 GN=Myh11 PE=1 SV=1
old/young	-0.097	0.677323	0.169204	1704.82	0.844	3	5	inferred	Q8BU14	Q8BU14|SEC62_MOUSE Translocation protein SEC62 OS=Mus musculus OX=10090 GN=Sec62 PE=1 SV=1
old/young	0.171	0.678322	0.168564	1707.34	0.844	3	1	inferred	Q6PGN3	Q6PGN3|DCLK2_MOUSE Serine/threonine-protein kinase DCLK2 OS=Mus musculus OX=10090 GN=Dclk2 PE=1 SV=1
old/young	0.132	0.678322	0.168564	1707.34	0.844	3	2	inferred	P62320	P62320|SMD3_MOUSE Small nuclear ribonucleoprotein Sm D3 OS=Mus musculus OX=10090 GN=Snrpd3 PE=1 SV=1
old/young	-0.27	0.679321	0.167925	1709.85	0.844	1	1	inferred	O35099	O35099|M3K5_MOUSE Mitogen-activated protein kinase kinase kinase 5 OS=Mus musculus OX=10090 GN=Map3k5 PE=1 SV=3
old/young	0.127	0.679321	0.167925	1709.85	0.844	3	1	unresolved	E9Q5F4;P63260	E9Q5F4|E9Q5F4_MOUSE Actin, cytoplasmic 1 (Fragment) OS=Mus musculus OX=10090 GN=Actb PE=1 SV=1
old/young	0.113	0.679321	0.167925	1709.85	0.844	3	1	inferred	P38060	P38060|HMGCL_MOUSE Hydroxymethylglutaryl-CoA lyase, mitochondrial OS=Mus musculus OX=10090 GN=Hmgcl PE=1 SV=2
old/young	-0.134	0.68032	0.167287	1712.36	0.844	3	1	inferred	Q9WUD1	Q9WUD1|CHIP_MOUSE STIP1 homology and U box-containing protein 1 OS=Mus musculus OX=10090 GN=Stub1 PE=1 SV=1
old/young	-0.087	0.68032	0.167287	1712.36	0.844	3	7	inferred	B9EKR1	B9EKR1|PRPTZ_MOUSE Receptor-type tyrosine-protein phosphatase zeta OS=Mus musculus OX=10090 GN=Ptprz1 PE=1 SV=1
old/young	-0.069	0.68032	0.167287	1712.36	0.844	3	24	inferred	P51863	P51863|VA0D1_MOUSE V-type proton ATPase subunit d 1 OS=Mus musculus OX=10090 GN=Atp6v0d1 PE=1 SV=2
old/young	0.706	0.681319	0.16665	1714.88	0.844	3	2	inferred	Q8BUR4	Q8BUR4|DOCK1_MOUSE Dedicator of cytokinesis protein 1 OS=Mus musculus OX=10090 GN=Dock1 PE=1 SV=3
old/young	-0.128	0.681319	0.16665	1714.88	0.844	3	1	inferred	rev_Q9CR67	Q9CR67|TMM33_MOUSE reversed Transmembrane protein 33 OS=Mus musculus OX=10090 GN=Tmem33 PE=1 SV=1
old/young	-0.249	0.682318	0.166013	1717.39	0.844	2	1	inferred	Q91XM9	Q91XM9|DLG2_MOUSE Disks large homolog 2 OS=Mus musculus OX=10090 GN=Dlg2 PE=1 SV=2
old/young	0.115	0.682318	0.166013	1717.39	0.844	3	4	inferred	O89051	O89051|ITM2B_MOUSE Integral membrane protein 2B OS=Mus musculus OX=10090 GN=Itm2b PE=1 SV=1
old/young	0.102	0.682318	0.166013	1717.39	0.844	3	4	inferred	E9PVA8	E9PVA8|GCN1_MOUSE eIF-2-alpha kinase activator GCN1 OS=Mus musculus OX=10090 GN=Gcn1 PE=1 SV=1
old/young	0.132	0.683317	0.165378	1719.91	0.844	3	1	inferred	Q9ERE7	Q9ERE7|MESD_MOUSE LRP chaperone MESD OS=Mus musculus OX=10090 GN=Mesd PE=1 SV=1
old/young	0.084	0.683317	0.165378	1719.91	0.844	3	9	inferred	Q9D8W5	Q9D8W5|PSD12_MOUSE 26S proteasome non-ATPase regulatory subunit 12 OS=Mus musculus OX=10090 GN=Psmd12 PE=1 SV=4
[truncated: 807 more rows]

## Sheet: Supp. Table S2
	Antibody	Host specie	Ref. (Brand)
	Bcl-2	Rabbit	BS1511 (Bioworld)
	Caspasa 3	Rabbit	9661 (Cell Signaling)
	CD81	Mouse	sc-166029 (Santa Cruz)
	CERS2	Rabbit	HPA027262 (Sigma)
	cMyc Tag (4A6)	Mouse	05-724-25ug (Merck)
	cMyc Tag (4A6)-AF555	Mouse	16-225 (Merck)
	GAPDH	Mouse	8245 (Abcam)
	GFAP	Mouse	MAB3402 (Millipore)
	Map2	Chicken	822501 (Biolegend)
	MBP	Rat	MCA409S (AbD Serotec)
	NeuN clon A60	Mouse	MAB377 (Millipore)
	OLIG2	Goat	AF2418 (R&D Systems)
	PDI	Mouse	ADI-SPA-891-F (Enzo)
	Tau-5	Mouse	AHB0042 (Invitrogen)
	Tom20 (FL-145)	Rabbit	sc11415 (Santa Cruz)
	β-Actina	Mouse	A5441 (Sigma)
	Anti-Chiken-AF647	Goat	A-21449 (ThermoFisher)
	Anti-Goat-AF555	Donkey	A-21432 (ThermoFisher)
	Anti-Mouse-AF488	Donkey	A-21202 (ThermoFisher)
	Anti-Mouse-AF555	Donkey	A-31570 (ThermoFisher)
	Anti-Rabbit-AF488	Donkey	A-21206 (ThermoFisher)
	Anti-Rabbit-AF647	Donkey	A-31573 (ThermoFisher)
	Anti-Rat-AF647	Donkey	A-21208 (ThermoFisher)
	DAPI	-	268298 (Merck)
